# Supplementary material for: The Complex Admixture History and Recent Southern Origins of Siberian Populations
Source: Oxford University Press journal article supplement (doi:10.1093/molbev/msw055), 2016-03-18
Supplement: msw055_Supplementary_Data.zip [file msw055_Supplementary_Data.zip]

|                                                                                                                         |    |
|-------------------------------------------------------------------------------------------------------------------------|----|
| TEXT S1. SUPPLEMENTARY MATERIALS.....                                                                                   | 1  |
| <i>S1A. 3-population test and TreeMix results.....</i>                                                                  | 1  |
| <i>S1B. Validation of the Admixture History Graph method.....</i>                                                       | 2  |
| <i>S1C. Validation of AHG results for South Siberian populations.....</i>                                               | 3  |
| <i>S1D. Validation of the modifications to the admixture dating method based on wavelet<br/>transform analysis.....</i> | 5  |
| <i>S1E. Simulations of additional gene flow.....</i>                                                                    | 7  |
| <i>S1F. Simulations to determine the time-depth resolution of the method.....</i>                                       | 8  |
| <i>S1G. Simulations to assess the robustness of the method to mis-specification of parental<br/>groups.....</i>         | 9  |
| <i>S1H. Addressing other concerns with dates of admixture inference.....</i>                                            | 10 |
| <br>                                                                                                                    |    |
| TEXT S2. SUPPLEMENTARY NOTE ON HISOTRY AND ARCHAEOLOGICAL<br>RECORD OF SOUTH SIBERIA (ALTAIANS, TUVANS, BURYATS).....   | 13 |
| <br>                                                                                                                    |    |
| TEXT S3. SUPPLEMENTARY NOTE ON GENETIC HISTORY AND<br>ARCHAEOLOGICAL RECORD OF INDIVIDUAL POPULATION GROUPS.....        | 16 |
| <i>S3A. Yakuts and Dolgans.....</i>                                                                                     | 16 |
| <i>S3B. Tungusic-speaking populations.....</i>                                                                          | 19 |
| <i>S3C. Samoyedic-speaking populations.....</i>                                                                         | 22 |
| <i>S3D. Populations of the Russian Far East: Chukchi and Naukan Yupik.....</i>                                          | 24 |
| <i>S3E. General comments.....</i>                                                                                       | 27 |
| <br>                                                                                                                    |    |
| Supplementary References.....                                                                                           | 29 |
| Supplementary Tables S1-S3.....                                                                                         | 35 |
| Supplementary Figures S1-S23.....                                                                                       | 54 |

1 TEXT S1. SUPPLEMENTARY MATERIALS

2 *S1A. 3-population test and TreeMix results*

3 The 3-population test (Patterson et al. 2012) is based on allele frequency correlations across  
4 populations, and the observation of a significantly negative value of the  $f_3$  statistic is taken as clear  
5 evidence of admixture. We have applied this test (in its TreeMix implementation) to the Siberian  
6 data, and although most of the admixture signals inferred in the Far East and discussed in the manuscript  
7 are confirmed (see Table S2 for all significantly negative values of  $f_3$ ), some potential signals of  
8 admixture, which are confirmed by multiple other independent analyses and attested to historically  
9 are missed. In particular, the test confirms that the South Siberian populations show complex  
10 signals of admixture, and also confirms the signals of admixture in the Turkic-speaking Dolgans of  
11 northern Siberia. Yet, while historical accounts (supported by the results of other analyses based on  
12 genetic data, see Text S3A) suggest that the Dolgans trace their ancestry to Yakuts and Evenks  
13 (Stapert 2013, and references therein), Yakut ancestry in the Dolgans is not confirmed by the  $f_3$   
14 statistic. Also, whereas the three-population test provides statistically significant evidence that the  
15 southern Tungusic-speaking populations (Oroqen, Hezhen, Xibo) trace their ancestry to populations  
16 related to the modern day Koryaks, Nganasan and Mongolians (as is suggested by other analyses in  
17 Text S3B), no such signal is detected for the northern Tungusic-speaking groups (Even and  
18 Evenks); the strong signal of recent gene flow into these groups from the neighbouring Yakuts and  
19 Koryaks (particularly evident in the analysis of IBD segments) is not identified either. Similarly,  
20 while the test supports a signal of admixture in the Chukchi when Naukan Yupik and Koryaks are  
21 used as source populations, the signal of the reciprocal gene flow from the Chukchi into the Naukan  
22 Yupik is not supported. In addition, while the Samoyedic-speaking populations (except the  
23 Nganasan) appear to be closely related based on PCA, ADMIXTURE, AHG, and the analysis of  
24 IBD segments, the three-population test fails to detect Khanty ancestry in the Selkup, while it does  
25 identify it in the Nenets groups.

26

27 We also attempted to investigate the history of admixture in the Siberian populations with the  
28 TreeMix approach (Pickrell & Pritchard 2012). This approach infers a maximum-likelihood tree  
29 and then sequentially adds migrations that reduce the residuals between the observed data and the  
30 fitted data. However, even after ten migration edges were added (Fig.S7A) the residuals were still  
31 quite large (24.9 standard errors; Fig.S7B). The results are difficult to interpret due to the close  
32 relationship between the populations being analysed, although the analysis does confirm that all

33 present-day Siberian populations trace their ancestry to South Siberia. Some other results reported  
34 in the Main Text and Text S3 are also supported, e.g. additional gene flow into the Samoyedic-  
35 speakers from populations related to the modern day Nganasan and Khanty. Admixture events  
36 suggested by PCA, ADMIXTURE, analysis of the IBD segments and multiple regression analyses  
37 (and in many cases supported by the  $f_3$  statistic or independent genetic analyses and attested to in  
38 the historical records) that are nevertheless not inferred by TreeMix include: Finno-Ugric gene flow  
39 into Russians, recent gene flow from Yakuts into the neighbouring Even population, and reciprocal  
40 gene flow between Chukchi and Naukan. In addition, the Dolgans are not being modelled as  
41 admixed between Evenks and Yakuts, and the impact of the Xiongnu invasions (Asian admixture in  
42 the northern Turkic- and Tungusic-speakers, see Text S3E below) is also not observed. At the same  
43 time, a number of inferred migration edges are hardly plausible, e.g. the gene flow from the San  
44 population of southern Africa into the Buryats of south Siberia, or the gene flow from the Han  
45 Chinese into the San. Also unlikely is the gene flow edge inferred between the Hezhen (southern  
46 branch of the Tungusic language family) and the branch leading to all the northern Tungusic and Far  
47 Eastern populations as well as Greenland Inuit (this gene flow therefore could not have been recent,  
48 and must have preceded the migration of Paleo-Yupik-Inuit into the Bering Sea region).  
49 While significant  $f_3$  scores are taken to indicate admixture, nonsignificant tests do not necessarily  
50 indicate its absence, as processes such as genetic drift following admixture could mask the signal  
51 (Patterson et al. 2012). This could affect for example admixture signals in the Yakuts - a population  
52 which has been shown by the analysis of the distribution of lengths of IBD segments to have  
53 recently experienced a founder effect (Text S3A). In addition, given complex admixture histories  
54 with multiple admixture events as suggested by the ADMIXTURE analysis (Fig.3), the tests based  
55 on pairwise comparisons might not be very informative. Similarly, it is not surprising that the tree  
56 inferred by the TreeMix analysis appears to be a poor fit to the data, since all other results suggest  
57 recent shared ancestry followed by complex multiple and often reciprocal admixture events; i.e. the  
58 Siberian populations did not experience a tree-like population history.

### 59 *S1B. Validation of the Admixture History Graph method*

60 In order to validate the AHG method, we generated (using R) populations with all the possible  
61 combinations of admixture proportions A, B and C such that in the populations reconstructed as  
62 they were at the time of admixture the initial ancestry component A was allowed to vary around  
63 10%, 20%, 30%, 40% and 50% (with  $B=1-A$ ), and the later contribution of C similarly varied from  
64 around 10%, 20%, 30% etc to around 90%. For each of the different admixture histories 100,000  
65 outcomes were generated. We then ran the covariance test described in the Materials and Methods

66 section of the main text to determine the sequence of admixture events. For sample sizes of 10  
67 individuals the sequence of admixture events was inferred correctly for all values of A (100% of  
68 outcomes with the correct history inferred), unless the initial proportion of A or C was less than  
69 10%, or the initial proportion of C was over 90%, bringing the final proportion of A to below 5%.  
70 When the final proportion of ancestry A in a population dropped to below 5%, the performance of  
71 the method diminished slightly (Fig.S2A).

72 To determine if the test is useful for more complicated admixture scenarios we added another  
73 ancestry component (D) to the hypothetical populations already containing ancestries A, B, and C at  
74 various mixture proportions. We tested various possible mixture combinations that would allow for  
75 the final proportions of any ancestry to be above 5% (Fig.S2B). For sample sizes of 10, the  
76 admixture history is inferred correctly more than 95% of the time for a wide range of possible  
77 permissible values of A and C (0.2-0.8) and for values of D up to 70%. (Fig.S2B).

78 Additionally, we explored a scenario where one admixture event between two already admixed  
79 populations leads to the appearance of a population with four sources of ancestry ((AB)(CD))  
80 (Fig.S2C). Again, for sample sizes of 10, the admixture history is inferred correctly more than 98%  
81 of the time for a wide range of possible permissible values of A and C and for different mixing  
82 ratios of AB and CD (Fig.S2C).

### 83 *S1C. Validation of AHG results for South Siberian populations*

#### 84 Altaians

85 For the Altaians, the configuration most supported by the AHG calculation is (European, Western  
86 Siberian)(Central Siberian, EAsian), shown in Fig.7B. This graph is supported by three out of four  
87 sets of covariance tests across the top 30% of the ADMIXTURE runs (see Main Text and Table S3),  
88 while the remaining set of tests involving West Siberian, Asian and European ancestries suggest  
89 Western Siberian was coupled with Asian, rather than European. Because the admixture history  
90 suggested by the AHG results is different for the Altaians and Tuvans, despite their apparent  
91 similarity in ancestry composition as inferred by ADMIXTURE, we tested the admixture tree  
92 supported by the AHG for the Altaians (European,West Siberian)(Central Siberian, EAsian) against  
93 the tree suggested for the Tuvans (((European, Central Siberian)Western Siberian)EAsian). The  
94 question here was: if we simulate the ancestral population under the (((AB)C)D) admixture model  
95 using as input parameters the means and variances for the A, B, C and D components as observed in  
96 the Altaians, how likely are we to recover the incorrect (AB)(CD) graph using the AHG method?

97 Based on the results of 100,000 simulations we estimate the probability of this error to be around  
98 5%.

#### 99 Tuvans

100 Because Tuvans have two out of four ancestries present at low proportion (namely Western Siberian  
101 and European), the covariance tests were largely inconclusive (Table S3), and we had to rely only  
102 on covariance tests which did not involve both of these ancestries simultaneously as part of the  
103 tested trio. Based on these more reliable tests, out of fifteen possible configurations only three were  
104 supported. These three configurations are: (((European, Western Siberian)Central Siberian)EAsian),  
105 (((European, Central Siberian)Western Siberian)EAsian), and (((Western Siberian, Central  
106 Siberian)European)EAsian).

107 Nevertheless, analysis of ancestry block structure reveals that blocks of European and Central  
108 Siberian ancestry are the smallest and therefore are likely to be the oldest in Tuvans. However, there  
109 is clear evidence of recent additional Central Siberian gene flow into Tuvans, as in addition to small  
110 blocks they exhibit an abundance of wide blocks not seen in the Altaians (Fig.7C). On the other  
111 hand, the average width of Western Siberian ancestry blocks is only slightly smaller than that of  
112 Asian ancestry blocks, and although this implies that the Asian ancestry is more recent (in  
113 agreement with all the AHG results), the difference is too small to distinguish in terms of inferred  
114 admixture dates (the date inferred for these two ancestries is ~1,980 ya). Given this additional  
115 evidence, we conclude that the configuration best supported for Tuvans is (((European, Central  
116 Siberian)Western Siberian)EAsian), and it was this configuration that we tested against the graph  
117 inferred for Altaians (European, Western Siberian)(Central Siberian, EAsian). We tried to simulate  
118 the admixture history (AB)(CD) using as the input for A, B, C and D the sample means and  
119 variances for the European, Central Siberian, Western Siberian and EAsian ancestry components  
120 observed in the Tuvans. However, as part of the simulation we generate the parameter space of all  
121 possible combinations of A, B, C and D available for the population at the time of admixture under  
122 a given admixture model and observed admixture proportions, and the Tuvan set of parameters was  
123 outside such a parameter space, i.e. the (AB)(CD) admixture model (at least in its simplest form  
124 without additional gene flow) inferred for Altaians is not possible for Tuvans. For example, if we  
125 assume that the Central Siberian and EAsian ancestry we observe in Tuvans originated from the  
126 same source population (as in Altaians), then we can estimate the initial parameters in the admixing  
127 population. For Tuvans, let

128  $mc=0.37$  (observed mean frequency of Central Siberian ancestry)

129  $md=0.39$  (observed mean frequency of EAsian ancestry)

130  $ma=0.11$  (observed mean frequency of European ancestry)

131  $mb=0.08$  (observed mean frequency of Western Siberian ancestry)

132 (Note that the Tuvans also have 3% Far Eastern and 2% Yupik-Inuit ancestry components, which do  
133 not enter into the calculations). From these values we can first estimate the initial frequency of the  
134 Central Siberian ancestry in the initial admixing population:

135  $mz = mc / (1-(ma+mb)).$

136 In this example, the initial mean frequency of the component  $mc$  was 0.46. As  $mz$  is distributed in  
137 the interval (0,1) and follows a truncated gamma distribution, the maximal expected variance is  
138  $((1-mz)^2)/3$  or 0.097. We can compare this value for variance with the one that would yield the  
139 observed variances in  $mc$  and  $md$  :

140  $vc= 0.0005$  (observed variance of Central Siberian ancestry)

141  $vd=0.002$  (observed variance of EAsian ancestry)

142  $vz = (1-2*mz) / ( (vd+md^2) / (vc+mc^2) - 1 ) - mz^2$

143 In this example, the value of  $vz$  we obtain is 0.46 and this value violates the restriction of 0.097  
144 calculated above.

145 In addition, we can simulate the admixture history inferred for Tuvans ((AB)C)D only if the A  
146 component assumes the mean and variance of the European component as observed in Tuvans (and  
147 B is calculated as 1-A), while if we express A through the Central Siberian component, this  
148 admixture graph becomes impossible. In fact the Central Siberian component with the mean and  
149 variance as observed in Tuvans is not possible under any simple model of 4-way admixture given  
150 the other parameters seen in this population. We therefore suggest that this is complementary  
151 indirect evidence for more recent additional Central Siberian gene flow into this population.

152 *SID. Validation of the modifications to the admixture dating method based on wavelet transform*  
153 *analysis.*

154 We constructed different sets of artificially admixed chromosome 1 from the phased genotypes of

155 unrelated Yoruban (YRI) and Han Chinese (CHB) individuals and individuals of European ancestry  
156 (CEU), downloaded from the International HapMap project home page (International HapMap  
157 Consortium et al. 2007). First, we simulated admixture between YRI and CEU haploid  
158 chromosomes. Admixed genomes were constructed as described previously (Pugach et al. 2011).  
159 Briefly, we started by building a recombination map by drawing from an exponential distribution  
160 with weight  $\lambda$ , such that an ancestry switch occurred with probability  $1 - e^{-\lambda g}$  for each distance of  $g$   
161 Morgans. The  $\lambda$  parameter reflects the time of admixture through the expected number of ancestry  
162 switches (or breakpoints) that occur given the rate of admixture and recombination (Pugach et al.  
163 2011). In our previous study (Pugach et al. 2011) we showed that for simulated data, the observed  
164 number of breakpoints starts to deviate from the expected value beginning around 50-100  
165 generations since the admixture event (depending on the rate of admixture and the effective  
166 population size,  $N_e$ ) (Fig.S18A), which means that the actual time of admixture the simulated  
167 number of breakpoints (parameterized by  $\lambda$ ) corresponds to is older than  $\lambda$ . In other words and  
168 based on the results obtained previously (Pugach et al. 2011), recovering a  $\lambda$  of 80 in the hybrids  
169 would indicate power to recover admixture events which have occurred 85 generations ago, if the  
170 rate of admixture was 30%; 100 generations ago, if the admixture rate was 40%, and 115  
171 generations ago, if 30% admixture happened in a population with small  $N_e$  (which applies to most  
172 of the Siberian populations as evident by the genome-wide pattern of LD (Fig.S11)). To generate  
173 artificial genomes we started at the beginning of each simulated chromosome and at each of the  
174 recombination points from the recombination map we sampled CEU ancestry with probability  $\alpha$  and  
175 YRI ancestry with probability  $1 - \alpha$ , where the value of  $\alpha$  was sampled from a beta distribution with  
176 mean 0.30 and standard deviation 0.10. The following values of  $\lambda$  were simulated: 80, 100, 120. We  
177 constructed 20 admixed chromosomes for each value of  $\lambda$ . These artificial chromosomes were then  
178 used as one of the parental populations for another simulated admixture event, involving CHB. New  
179 hybrids were constructed exactly as above, but the values of  $\lambda$  simulated for this more recent  
180 admixture event were: 10, 20, 40, and 60. As before, 20 haploid chromosomes were simulated per  
181 population. Thus, in total 12 artificial data sets with different admixture histories were simulated  
182 (each recent admixture time point is simulated three times, each time using a different admixture  
183 background). To recover these 24 admixture dates (two dates of admixture for each of these  
184 artificial populations), we first inferred ancestry along the chromosomes using PCAdmix with the  
185 same settings as for the empirical data. Wavelet decomposition of the admixture signal as inferred  
186 by PCAdmix was performed following the workflow described for the empirical data. The results  
187 are reported in Fig.S20 and demonstrate that the admixture dating protocol (Pugach et al. 2011)  
188 which we now modified to apply to dating two (or more) pulses of gene flow into the same

189 population, does recover both dates of admixture quite accurately. The time-depth resolution of the  
190 method is discussed in the next section.

191

192 As a further part of the validation scheme we inferred the dates of admixture in Russians as  
193 revealed by ADMIXTURE (Fig.3) using two different methods: the one described in this study, and  
194 the previously published StepPCO method (Pugach et al. 2011). Although both methods use wavelet  
195 transform analysis for the time of admixture estimation, the inference of ancestry along the  
196 chromosome is based on different approaches in these two methods. The method used here requires  
197 phased data (which potentially introduces phasing switch error (Tang et al. 2006; Andrés et al.  
198 2007)), and the PCAdmix algorithm (Brisbin et al. 2012), which uses HMM to assign ancestry for  
199 small non-overlapping windows across the genome. The second method uses the StepPCO  
200 approach (which does not require the data to be phased), and the windows taken across the genome  
201 are larger and overlapping; furthermore, the assignment of ancestry within each window is based on  
202 the PC1 coordinates of the SNPs within the window. In both instances we used Italians and Khanty  
203 as proxies for the parental populations (chosen based on the results of ADMIXTURE, Fig.3). Based  
204 on the results of PCAdmix the admixture event in Russians is estimated to have occurred 870 years  
205 ago (CI: 810-1,020), and the StepPCO method yields a similar date of 750 years ago (CI: 600-960).  
206 It has been suggested previously that in the course of their history Russians assimilated and  
207 admixed with Finno-Ugric tribes of northeastern Europe (Balanovsky et al. 2008; Khrunin et al.  
208 2013), and the time we infer here with both methods (beginning to middle of the 13<sup>th</sup> century) is  
209 consistent with this potential source of the admixture signal (Alekseeva 2002).

#### 210 *SIE. Simulations of additional gene flow*

211 To understand the effect on estimates of time of admixture in situations when the same ancestral  
212 population contributes to the admixed population multiple times, we first simulated admixture  
213 between YRI and CEU haploid chromosomes at 120, 100 and 80 generations ago (as described in  
214 the previous section). Then, on each of these artificial backgrounds one additional admixture event  
215 involving haploid chromosomes from CHB was introduced at 60 generations ago (as before), thus  
216 producing three sets of artificially admixed populations. For each of these three sets we then  
217 introduced additional gene flow from CEU haploid chromosomes. The values of  $\lambda$  simulated for this  
218 additional admixture event were: 20, 30 and 40. Furthermore, for each of these time points we  
219 tested scenarios involving four different rates of admixture, with  $\alpha$  being 0.1, 0.2, 0.3 or 0.4. This  
220 produced 36 different admixture histories. As before, to recover the dates of admixture (two dates  
221 for each of these admixture histories), we first inferred ancestry along the chromosomes using



222 PCAdmix with the same settings as for the empirical data. Wavelet decomposition of the admixture  
223 signal as inferred by PCAdmix was performed following the workflow described for the empirical  
224 data. The results are reported in Fig.S21. As expected, additional gene flow lowers the estimated  
225 dates of admixture, as it introduces new wider ancestry blocks into the population, thereby altering  
226 older narrower block structure and erasing information on past admixture events. Higher rates of  
227 additional gene flow amplify this effect, and the underestimates are most severe for scenarios  
228 involving the most recent gene flow ( $\lambda = 20$ ), and the highest admixture rates ( $\alpha = 0.4$ ). Furthermore,  
229 the confidence intervals for the dates inferred for the earlier vs. later event of admixture overlap  
230 considerably. This means that in some situations an earlier admixture event might be inferred to be  
231 younger than a more recent admixture event.

232

### 233 *SIF. Simulations to determine the time-depth resolution of the method*

234 The power to correctly infer small ancestry tracts characteristic of older admixture events depends  
235 a) on the density of informative SNPs present in the data, b) on the degree of genetic differentiation  
236 of the source populations and c) on the robustness of the method to the source population being  
237 mis-specified. Although we have shown previously that in general the wavelet transform method  
238 offers a better resolution than any of the existing admixture dating methods it has been compared to  
239 (Pugach et al. 2011), the data itself could pose a limitation on how far back in time the dates of  
240 admixture could be recovered. To test this we again constructed different sets of artificially  
241 admixed genomes following the strategy described in the previous paragraph, but using the same  
242 populations (and same markers) that were used as the source groups for our admixture dating  
243 routine, i.e. Koryaks (KRY), Italians (ITA), Khanty (KHA), Nganasan (NGA) and Greenland Inuit  
244 (ESK), generating hybrid chromosomes to mimic the admixture histories observed for the Siberian  
245 dataset. For the first event of admixture we simulated 22 different values of  $\lambda$  ranging from 20 to  
246 200. For each value of  $\lambda$  20 admixed chromosomes were constructed. These artificial chromosomes  
247 were then used as one of the parental populations for another simulated admixture event. New  
248 hybrids were constructed exactly as above, but the values of  $\lambda$  simulated for this more recent  
249 admixture event ranged from 10 to 100 (but always keeping this  $\lambda$  smaller than the  $\lambda$  used to  
250 generate the background event of admixture). As before, 20 haploid chromosomes were simulated  
251 per population. In total 118 artificial data sets for each of the admixture histories were simulated. To  
252 recover the dates of admixture (two dates of admixture for each of these artificial populations) we  
253 followed the workflow described for the empirical data, we first inferred ancestry along the  
254 chromosomes using PCAdmix, and then used wavelet decomposition of the admixture signal as

255 inferred by PCAdmix to recover the dates. The results are reported in Fig.S18 and demonstrate that  
256 most simulated admixture events are inferred to have happened not more than 4,000 years ago.  
257 Nevertheless, most of the dates we infer for the Siberian dataset are within the bounds of the  
258 method's resolution. Furthermore, they are in good agreement with what has been suggested by  
259 other studies, e.g. Haak et al (Haak et al. 2015) and Allentoft et al (Allentoft et al. 2015) which show  
260 that large scale bi-directional migrations across the Eurasian steppe in the Bronze age produced  
261 major changes in the genetic structure of Eurasia, admixing with and replacing autochthonous  
262 populations.

### 263 *SIG. Simulations to assess the robustness of the method to mis-specification of parental groups*

264 To assess the effect of mis-specification of parental groups on the time of admixture estimates, we  
265 similarly constructed different sets of artificially admixed chromosomes (chromosome 1 only), but  
266 using CEPH panel Affymetrix 500K SNP chip data (López Herráez et al. 2009) from Siberian  
267 (Oroqen), Pakistani (Balochi) and European (French) individuals, generating hybrid chromosomes  
268 which matched the Siberian dataset in the most important characteristics such as the degree of  
269 separation of the parental groups and the density of markers (24,068 Affy SNPs vs 26,420 Illumina  
270 SNPs). First, we simulated admixture between French (FRE) and Oroqen (ORO) haploid  
271 chromosomes. We used a rate of admixture of 0.3 and simulated 19 different values of  $\lambda$  ranging  
272 from 65 to 260. For each value of  $\lambda$  20 admixed chromosomes were constructed. These artificial  
273 chromosomes were then used as one of the parental populations for another simulated admixture  
274 event, involving Balochi (BAL). New hybrids were constructed exactly as above, but the values of  
275  $\lambda$  simulated for this more recent admixture event ranged from 55 to 110 (but always keeping this  $\lambda$   
276 smaller than the  $\lambda$  used to generate the background event of admixture). As before, 20 haploid  
277 chromosomes were simulated per population. In total 134 artificial data sets with different  
278 admixture histories were simulated. Next, we inferred ancestry along the chromosomes with  
279 PCAdmix supplying as parental groups either the true source populations (French, Oroqen and  
280 Balochi) or the mis-specified proxies a) Italians from Bergamo in lieu of French, b) Yakut and  
281 Burusho or c) Han and Yoruba in lieu of Oroqen and Balochi, respectively. The results of this  
282 analysis are shown in Fig.S22A-C, while Fig.S22D shows results of the PCA performed on the  
283 SNPs included in the analysis. It is evident that when a reasonable proxy is used ( $F_{st}=0.002$   
284 between French and Bergamo individuals, as estimated by PLINK) the results are essentially the  
285 same (Fig.S22A). Furthermore, for admixture times up to 100 generations ago the results remain  
286 reliable even when the proxies are a poor choice for a true source population ( $F_{st}=0.016$  between  
287 Oroqen and Yakuts, and  $F_{st}=0.013$  between Oroqen and Han)(Fig.S22B). Considerable errors in

288 admixture time estimation (Fig.S22C) are only observed when the proxies used are dramatically  
289 either less (experiment b) or more differentiated (experiment c) than the true source populations are  
290 (Fig.S22D). In both examples the dates involving Burusho and Yoruba admixture are over-  
291 estimated. In the first scenario, where all three proxy populations are not well differentiated for the  
292 SNPs used in the analysis, PCAdmix seems to randomly assign segments of chromosomes it does  
293 not "recognize" making the inferred ancestry blocks more uniform in length. In the second scenario  
294 one of the proxies used was so different from the true source population ( $F_{st}=0.136$  between Yoruba  
295 and Balochi), that only 3% of the chromosomes were assigned to this ancestry (instead of the  
296 simulated 30%), making the ancestry blocks very small and leading to a dramatic overestimation of  
297 one of the admixture dates, while the second one was underestimated due to artificial extension of  
298 the remaining ancestry blocks. Unfortunately, most of the currently available admixture dating  
299 methods require the use of pre-defined source populations. Identification of an appropriate source  
300 group is always difficult, especially for populations that have experienced admixture a long time  
301 ago, and hence had more time to experience genetic drift. Since incorrect identification of source  
302 groups could potentially lead to erroneous conclusions, careful attention is required when  
303 identifying parental groups. These experiments however show that PCAdmix is fairly robust to the  
304 mis-specification of parental groups (as was already shown in (Brisbin et al. 2012) for admixture  
305 events involving two ancestral populations) and that the mistake in the choice of proxies would  
306 have to be considerable for it to noticeably affect the inferred admixture dates.

### 307 SIH. Addressing other concerns with dates of admixture inference

308 We assessed the possibility of overestimating the dates of admixture due to potential errors in  
309 ancestry estimation by PCAdmix. Indeed, if small errors are being introduced during ancestry  
310 estimation (with small blocks of "inappropriate" ancestry being inserted within long continuous  
311 blocks), such errors would cause the signal of admixture to appear older. We calculated the widths  
312 of ancestry blocks, as inferred by PCAdmix, in Anabar Dolgans and scrutinized the genomewide  
313 distribution of block widths for each individual and each ancestry. The results are summarized in  
314 Fig.S23. We do not observe an excess of short ancestral blocks, and hence find no evidence for  
315 erroneous insertions by PCAdmix.

316 In addition, for every individual and every window, PCAdmix outputs posterior probabilities  
317 obtained from the HMM of assignment to a particular ancestry. To further explore if errors in  
318 PCAdmix ancestry estimation affect our dates of admixture inference, in another set of experiments  
319 we performed admixture dating using only those PCAdmix windows where the ancestry was

320 inferred with high confidence (at least 0.8 probability in at least 80% of samples). Comparison of  
321 dates of admixture inferred using a full set of windows vs. only high confidence windows  
322 (Fig.S24A) reveals no tendency to overestimate admixture dates when all the data are used, and  
323 again argues against PCAdmix being the source of systematic error in our dates of admixture  
324 inference.

325  
326 Since it is known that haplotype phasing at the level of the entire chromosome is subject to phasing  
327 (switch) errors (Tang et al. 2006; Andrés et al. 2007), we wanted to assess to what extent such  
328 potential switch errors might affect our results. For two-way admixture we can directly compare  
329 results obtained from phased and unphased data (see the discussion in section S1D of similar dates  
330 obtained for admixture in Russians using two different methods). For admixture scenarios involving  
331 more than two sources of ancestry, the direct comparison is impossible, since the StepPCO  
332 approach (which uses unphased data) cannot handle more than two parental populations and  
333 PCAdmix requires phased data. Therefore, to test the effect of phasing on admixture dating in a  
334 population with more than two sources of ancestry, we re-phased part of the data using a different  
335 phasing algorithm, SHAPE-it (Delaneau et al. 2008). SHAPE-it has been shown to have a lower  
336 error rate than BEAGLE (Browning & Browning 2007), which was the phasing algorithm  
337 employed for this study. The expectation here was that if phasing switch error has a strong influence  
338 on the inferred dates of admixture, then a different switch error rate should result in a different date  
339 of admixture estimate. Our results show that dating a three-way admixture event using BEAGLE-  
340 phased vs. SHAPE-it-phased data yields almost identical dates (Fig.S24B).

341 In another set of experiments we took the PCAdmix output and "unphased" it by collapsing each  
342 pair of windows corresponding to two phased chromosomes of each individual into one, and then  
343 running wavelet transform analysis on such "unphased" chromosomes. Although this is not the  
344 same as using unphased data (as "unphasing" is done on windows, not on genotypes), we still  
345 expect the small ancestry blocks potentially introduced by switch error to disappear and their effect  
346 on dates of admixture estimation to be removed. For example, if the ancestry inferred by PCAdmix  
347 in six consecutive windows on two phased parental chromosomes is 1 2 1 2 0 1 and 2 1 2 1 0 1  
348 (ancestry from parental populations 0, 1 or 2), then our "collapsed" chromosome will have the  
349 following assignment for these windows: 3 3 3 3 0 1 (3 coding a window with ancestry assigned to  
350 both parental populations 1 and 2). It is easy to see that such "unphasing" converts four potentially  
351 erroneous small ancestry blocks into one longer ancestry block. If we indeed have such erroneously  
352 inferred small blocks of ancestry in our data, "unphasing" should result in a more recent admixture

353 date. This however is not the case, and the dates of admixture inferred using phased and "unphased"  
354 data were almost identical (Fig.S24A). In summary, phasing switch error does not appear to have a  
355 strong influence on our results.

356 TEXT S2. SUPPLEMENTARY NOTE ON HISTORY AND ARCHAEOLOGICAL  
357 RECORD OF SOUTH SIBERIA (ALTAIANS, TUVANS, BURYATS)

358

359 Some of the earliest archaeological monuments in the Altai region that postdate the Last Glacial  
360 Maximum belong to the Afanasevo culture, which flourished from around 5,000 years ago (ya)  
361 (Naumov 2006). Morphologically, the skeletal remains associated with this culture show affinities  
362 with Europeans (Solodovnikov 2003). These affinities are confirmed by analyses of ancient  
363 genomes which demonstrate that the Afanasevo culture can be traced to an immigration of peoples  
364 from the Yamnaya culture from the Pontic-Caspian steppe. The same peoples have been shown to  
365 have also contributed genetically to populations of northern and central Europe (Allentoft et al.  
366 2015). Around 3,500-4,000 ya the Afanasevo culture was succeeded or replaced by the Okunev  
367 culture (Savinov & Podolskiy 2006; Sokolova 2007), the bearers of which have been shown to be  
368 genetically distinct from the Afanasevo and manifest genetic affinity towards present-day Native  
369 Americans (Allentoft et al. 2015). Controversially, some researchers claim that the Okunev culture  
370 has been brought to the Altai region by immigrating peoples (Sinor 1990; Savinov & Podolskiy  
371 2006), while others suggest that it pre-dated, possibly co-existed with, and later assimilated the  
372 Afanasevo people (Sokolova 2007). The recent finding that the Okunev people could be related to  
373 the Upper Paleolithic Mal'ta individuals from Lake Baikal (Allentoft et al. 2015) that was shown to  
374 be genetically related to Native Americans (Raghavan, Skoglund, et al. 2014) is more consistent  
375 with the second possibility. The date of 3,360 ya inferred here for the admixture between the  
376 European and Western Siberian substrates in Altaians (Fig.7B) fits well with the Early Bronze Age  
377 eastward expansion of the Yamnaya people and their potential subsequent contact with the Okunev  
378 people in the Middle Bronze Age.

379

380 Around Lake Baikal, to the east of the Afanasevo and Okunev cultures and contemporary with  
381 them, thrived an independent archaeological culture called Serovo-Glazkovo (dated to 6,200-3,000  
382 ya; (Weber & Bettinger 2010)). Analysis of ancient mtDNA lineages from Serovo-Glazkovo sites of  
383 the Baikal region show affinities with modern-day South and Central Siberian and East Asian  
384 populations, but not with western Eurasians (Moeder et al. 2006). Yet artifacts from Okunev and  
385 Serovo-Glazkovo archaeological sites show reciprocal influence of both traditions on each other,  
386 and it is not surprising that this cultural contact might have been accompanied by genetic contact as  
387 well (Nikolaev 2004), as is suggested by our results.

389 The archaeological record of Mongolia for the same time period attests to the emergence of a new  
390 grave culture, known as the Slab Grave culture. This cultural tradition persisted in Mongolia from  
391 3,100 to 2,300 ya, and is attributed to the ancestors of the Xiongnu people (also known as Asian  
392 Huns), who around 2,000 ya created a powerful empire which for three centuries dominated central  
393 and eastern Asia and extended from eastern Kazakhstan to western Manchuria (Rudenko 1962;  
394 Taskin 1968; Konovalov 1976; Miniaev 2001). There are notable similarities between the Bronze  
395 Age cultures of the Altai region (Okunev culture and its successors) and the Slab Grave culture of  
396 Mongolia, thus suggesting extensive cross-regional contacts between the Altai, Mongolia and Lake  
397 Baikal (Mooder et al. 2006; Tumen 2008 and references therein). Nuclear and mitochondrial DNA  
398 extracted from the skeletal remains contained in a 2,000 year old Xiongnu necropolis in northern  
399 Mongolia (Keyser-Tracqui et al. 2003) show affinities to modern-day South Siberian populations  
400 and Mongolians (Crubézy et al. 2010; González-Ruiz et al. 2012). And although the dates of around  
401 2,000 ya estimated for the appearance of the EAsian signal in Buryats and Tuvans perfectly  
402 correspond to the time period of the Xiongnu empire, we suggest, based on the distribution of the  
403 ancestral Asian block widths in populations of South Siberia (Fig.7C), that Buryats must have  
404 received additional gene flow from some East Eurasian source. This additional gene flow is likely  
405 to have occurred 800-600 ya, in the times of the Mongol empire under Genghis Khan and his  
406 successors, which stretched far beyond the modern borders of Mongolia. Hence, we suggest that the  
407 dates of EAsian admixture estimated for Buryats are composite and reflect: an older admixture  
408 event of around 2,700 ya, as observed in Altaians and as consistent with the dates for the  
409 appearance of the Slab Grave Culture in Mongolia associated with the ancestors of the Xiongnu:  
410 and a more recent admixture of around 800-600 ya, consistent with the Mongol expansion under  
411 Genghis Khan. Furthermore, mtDNA analysis of skeletal remains from Bronze Age archaeological  
412 sites in the eastern and western Altai shows that 5,000-3,000 ya mtDNA lineages in the western  
413 (Russian) Altai were exclusively of western Eurasian origin, while the mtDNA lineages in the  
414 eastern (Mongolian) Altai were exclusively eastern Eurasian. In contrast, all analysed skeletal  
415 remains from the Iron Age (2,800-1,800 ya) sites from the eastern and western Altai as well as from  
416 Kazakhstan (Pazyryk culture, traditionally associated with the Eastern Scythians and also with the  
417 Tarim mummies of western China (Li et al. 2010)), reveal the presence of both western and eastern  
418 Eurasian mtDNA haplogroups (González-Ruiz et al. 2012), in agreement with the AHG inferred for  
419 Altaians. These findings are also reflected in studies of uniparental markers in modern-day South  
420 Siberian populations that show a larger proportion of western Eurasian lineages in the populations  
421 of the Altai-Sayan than in the Baikal region (Derenko et al. 2003; Derenko et al. 2006). Since the

422 peoples with western and eastern Eurasian ancestries co-existed in the Altai for a prolonged period  
423 of time (González-Ruiz et al. 2012), it is plausible that the admixture date of ~2,300 ya estimated  
424 for the Altaians captures admixture between these local groups and is not associated with any  
425 additional migration from the outside.



426 TEXT S3. SUPPLEMENTARY NOTE ON GENETIC HISTORY AND  
427 ARCHAEOLOGICAL RECORD OF INDIVIDUAL POPULATION GROUPS

428 In the following sections we analyze signals of admixture and discuss the genetic prehistory of  
429 populations grouped either by their present-day geographical location or by their linguistic  
430 affiliation.

431

432 *S3A. Yakuts and Dolgans*

433 Although they live in central and northern Siberia, the Yakuts and Dolgans speak Turkic languages  
434 related to those spoken in the south. The Yakuts practice animal husbandry like the South Siberian  
435 Turkic-speakers, whereas the Dolgans are nomadic reindeer breeders and hunters like their  
436 neighbours, the Tungusic-speaking Evenks (Popov 1956a; Tokarev & Gurvich 1956; Vasilevich  
437 1956). Notwithstanding the great geographic distances that separate the Yakuts and Dolgans from  
438 their linguistic relatives, their genetic relationship with the South Siberian populations emerges  
439 clearly in both the PC and ADMIXTURE analyses. In the PC analysis, the Turkic-speaking  
440 populations are not separated along PC1-PC2, and a distinction between the southern (Altaians,  
441 Tuvans) and northern (Yakuts, Dolgans) Turkic-speaking groups is first observable only at PC3 and  
442 PC4 (Fig.S3). It has been shown before that for spatially structured data the first two PCs accurately  
443 capture geography, and genetic information can thus be used to infer geographic origin (Lao et al.  
444 2008; Novembre et al. 2008). Such a genetic trace of pre-migration origins can be discerned for the  
445 Yakuts: their position in the PC analysis would place their geographic origin to the east of Tuva and  
446 north of Buryatia; this is in good accordance with their purported origins around Lake Baikal  
447 (Tokarev & Gurvich 1956; Crubézy et al. 2010).

448

449 The hypothesis of a southern origin is also indirectly supported by the results of the IBD analysis.  
450 The amount of the IBD segments shared within the Yakuts is relatively high in comparison to other  
451 populations (Fig.S10); for instance, they share twice as many segments within the population as the  
452 Buryats, even though the census sizes of Buryats and Yakuts are comparable (Buryats – 461,389  
453 individuals, Yakuts – 478,085 individuals; Russian 2010 census). Furthermore, the slow decay in  
454 the frequency of small IBD segments (2-10 cM) in comparison to longer segments in the Yakuts  
455 (Fig.S10) also suggests a strong founder event (Palamara et al. 2012). Although the Yakuts currently  
456 constitute one of the most numerous indigenous ethnic groups in Siberia, this pattern of sharing of

457 IBD segments is consistent with a recent expansion from a small founding population, which is also  
458 supported by uniparental data (Pakendorf et al. 2002; Pakendorf et al. 2006; Zlojutro et al. 2009)  
459 and by the relatively high genome-wide LD in the Yakuts (Fig.S11B).

460 In terms of sharing with other populations, the Yakuts share more and the longest IBD blocks with  
461 the Dolgans, who are thought to be partially descended from Yakuts (Stapert 2013, and references  
462 therein), but also with the neighbouring Even groups (Sakkyryyr, Sebjan, Tompo), Buryats, and  
463 Evenks (Fig.5 and Fig.S12). The sharing of IBD blocks with Buryats is consistent with the idea that  
464 the Yakut ancestors once lived in close proximity to the ancestors of modern-day Buryats. The  
465 Dolgans share a large amount of long IBD segments with the Yakuts, Evenks, Nganasan and Evens  
466 (Fig.S12). While the Yakuts and Evenks are thought to have contributed genetically to the modern-  
467 day Dolgans, the affinity towards the Nganasan and Evens is probably indirect, and is best  
468 explained by these populations having themselves shared ancestry with the Evenks, although direct  
469 admixture with Nganasan cannot be excluded.

470

471 The ADMIXTURE results (Fig.3) suggest three sources of ancestry for the Yakuts and the Dolgans:  
472 Central Siberian (blue) (59% in the Yakuts, 67% in the Dolgans), EAsian (pink) (30% in the Yakuts,  
473 18% in the Dolgans), and European (light green) (10% in the Yakuts, 11% in the Dolgans). In  
474 contrast to their South Siberian Turkic-speaking relatives, the Yakuts and Dolgans lack the Western  
475 Siberian (yellow) component.

476

477 Analysis of the distribution of the widths of blocks of different ancestries reveals that the blocks of  
478 Central Siberian ancestry in Yakuts and Dolgans become progressively wider to the north and west  
479 (Fig.S14B). This would be consistent with additional recent gene flow from a population of mainly  
480 Central Siberian ancestry. In fact, the widest blocks and the highest variance around the mean are  
481 observed in the Taimyr Dolgans, the population with close genetic ties to the Evenks, who in turn  
482 have a high proportion of the Central Siberian ancestral component. The inferred dates for the  
483 Central Siberian admixture given in Fig.S14A therefore provide a lower bound for this event in the  
484 Yakuts. In the Dolgans, the Central Siberian date is likely an underestimate since the resolution for  
485 dating this admixture in the Dolgans is relatively low (Fig.S18H). The source of recent gene flow  
486 of Central Siberian ancestry to the Yakuts does not appear to be any of the neighboring Tungusic  
487 populations, since Yakuts completely lack the Far Eastern component (red) found in all the  
488 Tungusic groups (see below); however, given the frequency of this component in the neighboring  
489 Evenks and Evens, low levels of gene flow (1-3%) cannot be excluded. In contrast, the Far Eastern

490 component is observed in both Dolgan subgroups, albeit at very low frequency (less than 3%). This  
491 again is consistent with historical accounts of Dolgans tracing some of their ancestry (at least 33%,  
492 based on the amount of Far Eastern ancestry) to Evenks (Stapert 2013, and references therein). The  
493 absence vs. presence of this Far Eastern component thus genetically differentiates the Yakuts from  
494 the Dolgans. The substantially younger signal of European admixture in the Dolgans than the  
495 Yakuts can be explained by gene flow from Russians, known on the Taimyr from the 17th century  
496 (Stapert 2013, and references therein). Indeed, analysis of the means and variance of the inferred  
497 admixture blocks in the Yakuts and Dolgans (Fig.S14B) shows that the blocks of European ancestry  
498 are longer in the Dolgans than in the Yakuts and have higher variance, thus providing corroborating  
499 evidence for additional European gene flow in Dolgans. This implies that the date of 1,470 years BP  
500 inferred for the European admixture in the Dolgans reflects both an older signal of admixture  
501 already present in the Yakuts and South Siberian populations, and more recent contact with the  
502 Russian population of the Taimyr.

503

504 In summary, our results are in good accordance with the hypothesis that the Yakuts originated in  
505 South Siberia and stem from a shared ancestral population with Buryats (Tokarev & Gurvich 1956;  
506 Crubézy et al. 2010). The two seemingly contradictory pieces of evidence - the absence of a  
507 Western Siberian signal in the Yakuts and the different AHGs (which are consistent across the top  
508 30% of the ADMIXTURE runs) inferred for the Yakuts (Fig.S14A and Table S3) vs Buryats  
509 (Fig.7B) -- can be explained by drift and differential gene flow: on the one hand, low levels of  
510 Western Siberian ancestry could have been lost by drift in the small founding population of the  
511 Yakuts (indeed, Western Siberian ancestry is present at only 2% in the Buryats). On the other hand,  
512 recent differential gene flow after the divergence of the Yakuts (Central Siberian into the Yakuts and  
513 EAsian into the Buryats), as supported by the comparatively wide blocks of Central Siberian and  
514 EAsian ancestry in these populations, would have changed the configuration of their AHGs (see  
515 Fig.S21 and the simulations of the effect of additional gene flow from a population that was  
516 involved in an early admixture event described in Text S1E). The ethnogenesis of the Dolgans, who  
517 are linguistically very closely related to the Yakuts, but culturally very close to Evenks, has  
518 occurred in recent times and is known to have been influenced by the neighboring Yakuts, Evenks  
519 and Russians. Indeed, all our analyses confirm that the Dolgans are most closely related to the  
520 Yakuts and the Evenks (although some additional gene flow from Nganasan cannot be excluded  
521 with the genetic data), with evidence for recent additional gene flow from a European source.

522

523 *S3B. Tungusic-speaking populations*

524 Speakers of Tungusic languages are spread from the Yenisey river in the west to the Kamchatka  
525 Peninsula in the east, and from the Taimyr Peninsula in the north to China in the south (Fig.3). The  
526 Evenks and Evens, whose languages belong to the Northern Tungusic branch, are traditionally  
527 highly mobile hunters and reindeer herders who are dispersed over vast territories of Siberia (Levin  
528 1956; Vasilevich 1956), while the linguistically closely related Oroqen from northeastern China are  
529 traditionally hunters and horse herders. In contrast, the other Tungusic populations of the Amur  
530 region and northern China, such as the Hezhen and Xibo, speak languages belonging to the  
531 Southern Tungusic and Manchu branches. The Hezhen are traditionally fishers and hunters (Ivanov  
532 et al. 1956), while the Xibo are agriculturalists (Cheboksarov et al. 1965).

533

534 In the PCA, the Even and Evenk subgroups sampled all across Siberia show remarkably little  
535 genetic differentiation; the Evenk and Even populations are differentiated only along PC3 and PC4  
536 (Fig.2, Fig.S3) and along PC2 in the analysis comprising only the Siberian populations (Fig.S4).  
537 Surprisingly, there is no observable structure within either of these populations, even though the  
538 samples are from locations that are up to 2700 km apart.

539 Analysis of the IBD blocks suggests that the Evenks and Evens have a lower effective population  
540 size than the Tungusic peoples of the south (e.g. the Oroqen), as the former share more IBD  
541 segments within the population than the latter (Fig.S10). This is also evident in the pattern of  
542 genome-wide LD, where the Oroqen have lower genome-wide LD values than the Evens or the  
543 Evenks (Fig.S11A). Overall, Evenks and Evens share a large number of long IBD segments, and  
544 they also share such segments with neighbouring populations: the Evenks with the Nganasan,  
545 Dolgans, Yukaghirs and Nenets, the Evens with the Yukaghirs, Dolgans and the Yakuts (Fig.S12).

546

547 The results of the ADMIXTURE analysis (Fig.3) reveal that the Tungusic populations from all  
548 across Siberia, with the exception of the Xibo, trace their ancestry to three sources (Central Siberian  
549 (blue), EAsian (pink) and Far Eastern (red)). The Central Siberian component is higher in the west  
550 than in the east and south, and ranges from 85% in the Evenk subgroups and 64% in the Evens of  
551 Kamchatka to 40% in the Oroqen, 24% in the Hezhen, and 15% in the Xibo. The Far Eastern  
552 component is highest in the easternmost Even subgroups and lowest in Tungusic populations of  
553 western and southern Siberia; this ranges in frequency from 28% in the Evens of Kamchatka to 6%  
554 in the Evenks, 5% in the Oroqen, 4% in the Hezhen, and 2% in the Xibo. The EAsian component is  
555 seen at highest frequency in the southeast, where it reaches 54% in the Oroqen and 71% and 80% in

556 the Hezhen and the Xibo, respectively, while it is present at around 10% in the Evenks and Evens.  
557 The Tungusic peoples are further characterized by the complete absence of any European (light  
558 green) ancestry (except for the Xibo, who have 2% of this ancestry component).

559

560 Analysis of the ancestry block width inferred by PCAdmix (Fig.S15B) indicates that the blocks of  
561 Central Siberian ancestry are wider and the variance around the mean is higher in the Evenk groups,  
562 while the blocks become narrower and the variance decreases in the Oroqen, Hezhen, and Xibo.  
563 This pattern is compatible with a scenario of additional gene flow from a population of mainly  
564 Central Siberian ancestry into the western Tungusic groups (Evenks, and Evens from Sakkyryyr,  
565 Sebjan and Tompo). In addition, it has been shown previously with mtDNA and Y chromosome data  
566 that the Sakkyryyr and Sebjan Even subgroups have experienced substantial amounts of admixture  
567 from Yakuts (Pakendorf et al. 2007; Duggan et al. 2013). Our results based on autosomal data  
568 confirm this conclusion, as the Sakkyryyr Evens are much closer to the Yakuts than to the other  
569 Tungusic groups in all measures of genetic relatedness based on IBDs, while the Sebjan and Tompo  
570 Evens appear substantially closer to the Yakuts than do the Berezovka and Kamchatka Evens  
571 (Fig.S12). Also, the ADMIXTURE results show that Sakkyryyr Evens carry around 1.5% European  
572 ancestry (presumably contributed by the Yakuts). Assuming, that the elevated levels of EAsian  
573 ancestry in the Sakkyryyr, Sebjan and Tompo Evens in comparison to the Kamchatka and  
574 Berezovka Evens were contributed via admixture from the Yakuts, we can roughly estimate that  
575 they have received 14-40% gene flow from Yakuts (also see Fig.S5 for the ADMIXTURE results at  
576  $K=7$ ). On the other hand, the widest blocks of EAsian ancestry, and the highest variance around the  
577 mean, are observed in the Oroqen, Hezhen, and Xibo (Fig.S15B). This suggests substantial recent  
578 gene flow from a EAsian source population into the southern Tungusic peoples. Similarly, the  
579 distribution of the Far Eastern ancestry blocks is consistent with some additional contact between  
580 the Even subgroups closest to Kamchatka and the Koryaks, although this gene flow was not as  
581 abundant as the Central Siberian admixture detected in the Evenks and western Even subgroups or  
582 the EAsian admixture into the Tungusic populations of the south (Fig.S15B).

583

584 The AHGs (consistent across the top 30% of the ADMIXTURE runs) therefore yield a composite  
585 picture of the successive layers of differential admixture experienced by the Tungusic subgroups,  
586 leading to different configurations: ((Far Eastern, EAsian) Central Siberian) for the Evenks and  
587 western Even subgroups, and ((Central Siberian, Far Eastern) EAsian) for eastern Evens, Oroqen  
588 and Hezhen (Fig.S15A). Since the two eastern Even subgroups (Berezovka and Kamchatka), as

589 well as the Oroqen and Hezhen have experienced the least amount of recent gene flow from a  
590 population of Central Siberian ancestry, we assume that their AHG reflects the ancestral admixture  
591 history of all of the Tungusic-speaking populations. Later substantial gene flow from a source or  
592 sources of predominantly Central Siberian ancestry in the Evenks and western Even subgroups  
593 (Sakkyryyr, Sebjan, and Tompo) will have considerably lowered the estimated age of Central  
594 Siberian admixture for these groups, leading to this being reconstructed as the most recent event  
595 (see Fig.S21 and the simulations of the effects of additional gene flow from a population that was  
596 involved in previous admixture described in Text S1E). We therefore did not date the admixture  
597 events for the Evenks and western Even subgroups, but only show the inferred AHG (Fig.S15A).  
598 Substantial gene flow from a population of predominantly EAsian ancestry will have lowered the  
599 estimated age of the EAsian admixture in the Tungusic populations of the Amur region, but this  
600 would not have altered the AHG configuration.

601

602 The earliest ages estimated for the first admixture event are observed in the Oroqen (3,120 ya; CI  
603 2,700 – 3,630) and Hezhen (3,120 ya; CI 2,910- 3,930); however, these are unlikely to reflect the  
604 true age of the ancestral admixture event, as these dates exceed the resolution limit available for the  
605 Tungusic-speaking populations of ca. 2,700 years (Fig.S18F). These dates probably reflect the  
606 difficulty of PCAdmix to correctly assign fragments of chromosomes to either Central Siberian or  
607 Far Eastern ancestry when these fragments are small; alternatively this Central Siberian-Far Eastern  
608 substrate might represent the ancient diversity shared by all the Tungusic-speaking people, with  
609 additional Central Siberian admixture experienced only by Evens and Evenks. The oldest dates for  
610 the EAsian admixture of 1,860 ya (CI: 1710-2160) are seen in the Berezovka and Kamchatka  
611 Evens, who have experienced the least amount of recent EAsian admixture. However, since this  
612 date is at the very limit of our resolution (Fig. S18F) this gene flow could have happened earlier.  
613 This EAsian admixture event is likely to have occurred in the south, since all the Tungusic  
614 populations carry the EAsian ancestry component, and might have been associated with the  
615 Xiongnu empire (see Text S2), as although the Xiongnu empire was centred around modern-day  
616 Mongolia, it stretched far eastward to the Amur River tributaries and Western Manchuria (Barfield  
617 2001).

618

619 Previous studies have suggested either Lake Baikal (Vasilevič 1969) or the Amur River (reviewed in  
620 (Tugolukov 1980)) as the place of origin of the Tungusic populations. Based on our results, we can  
621 reject the area around Lake Baikal, as all populations in our study from this area have European

622 ancestry tracing back more than 3,200 years ago, and the Tungusic-speaking populations lack this  
623 substrate. We therefore suggest the Amur River as the place of origin of the Tungusic populations,  
624 which is also in good agreement with the archaeological evidence. Archaeological sites along the  
625 Amur are numerous, and the earliest are dated to at least 13,000 ya (Popov & Tabarev 2008). The  
626 Far Eastern and Central Siberian admixture inferred by our analysis could correspond to the latest  
627 Neolithic material culture of the region, which is dated to 4,000-3,000 ya and is associated with the  
628 appearance of fundamentally new stone-working techniques, which are ascribed to the arrival of  
629 new peoples (Derevianko & Clark 1965).

630

### 631 *S3C. Samoyedic populations*

632 The Samoyedic languages spoken by traditionally semi-nomadic reindeer-herding as well as  
633 hunting populations of western Siberia and the Yamal and Taimyr Peninsulas of the northernmost  
634 Russian Arctic belong to the Uralic language family, which also includes Finno-Ugric languages  
635 such as Finnish and Hungarian in Europe and Khanty in western Siberia. From historical data it is  
636 known that some Samoyedic languages were spoken in the Altai region of south Siberia, but these  
637 are now extinct (Vajda 2009). As shown by the PC analysis (Fig.2), the Nganasan are separated  
638 from their linguistic relatives, showing affinities with Evenks and Evens instead. The separation of  
639 the Nganasan from the other Samoyedic speakers is further underlined by the ADMIXTURE  
640 analysis and the analysis of the genome-wide LD (Fig.3 and Fig.S11C).

641

642 The distinguishing characteristic of the Samoyedic-speaking populations other than the Nganasan is  
643 that they trace their ancestry to at least three different sources. Both the Selkup and the Nenets have  
644 substantial proportions of Western Siberian (yellow) (Selkup: 52%, Yamal Nenets: 48%, Taimyr  
645 Nenets: 44%) and Central Siberian (blue) (Selkup: 26%, Yamal Nenets: 44%, Taimyr Nenets: 50%)  
646 ancestry. They also have European ancestry (light green) (Selkup: 13%, Yamal Nenets: 4%, Taimyr  
647 Nenets: 2%). In the Nganasan we observe neither a Western Siberian nor a European component. In  
648 fact, already at  $K=4$  individuals in this population are ascribed their own component (Central  
649 Siberian; cf. Fig.S5), indicating a different history of this population compared to the other  
650 Samoyedic peoples.

651

652 AHG analysis (Table S3) indicates that in the Selkup and Nenets the Western Siberian gene flow is  
653 the latest contribution (Fig.S16A; this is consistent across the top 30% of the ADMIXTURE runs).

654 Furthermore, wider on average blocks of Western Siberian and Central Siberian ancestry, and higher  
655 variance around the mean, suggest that all populations have experienced multiple events of gene  
656 flow from these sources (Fig.S16B). Therefore, the dates of admixture reported below are  
657 composite dates, and reflect an older date of admixture as well as this more recent additional gene  
658 flow. We estimate the date of admixture between the European (light green) and Central Siberian  
659 (blue) ancestries to be 2,700 ya (CI 2,490 -3,120) in the Selkup, and 2,490 ya (CI 2,310 – 3,120) in  
660 the Yamal Nenets (Fig.S16A). We did not attempt to date this signal of admixture in the Taimyr  
661 Nenets subgroup, because the estimated proportion of admixture in this group is too low for our  
662 method to work reliably (see Fig.S2A and Text S1B). The date obtained for the more recent  
663 admixture with the Western Siberian ancestral group is 1,590 ya for the Selkup and the Yamal  
664 Nenets (CIs 1,470-1,710 and 1,470-1,860, respectively); the estimated date for the Taimyr Nenets is  
665 more recent at 1,170 ya (CI 1,020 – 1,260). In this group we also observe wider and more variable  
666 ancestry blocks (Fig.S16B), which is consistent with the gene flow either being more recent, or  
667 occurring over an extended period of time. Importantly, the inferred dates for the Western Siberian  
668 admixture in the Samoyedic-speakers are at the limit of the resolution (Fig.S18E) and could  
669 therefore be an underestimate of the true date.

670

671 The sequence of admixture events and the dates of admixture estimated for the Selkup and Nenets  
672 (Fig.S16A) are relatively close to those obtained for Tuvans (see Fig.7B). Although the dates for the  
673 prehistoric mixture between the European and Central Siberian components are more recent for the  
674 Samoyedic populations (~2500-2700 ya) than the dates estimated for Tuvans (~3100 ya), this is  
675 most likely due to later additional gene flow into the Selkup and Nenets from some population of  
676 predominantly Central Siberian ancestry, as discussed in the main text, and also due to probable  
677 additional recent admixture with Russians (Fig.S16B). On the other hand, the EAsian component  
678 we observe in Tuvans (and Altaians) is not seen in any of the Samoyedic groups, and its arrival in  
679 the Sayan plateau (and the Altai region) predates the Western Siberian admixture estimated for the  
680 Samoyeds. Our analyses therefore suggest the following history for the Selkup and Nenets: it is  
681 likely that modern-day Selkup, Nenets, and Tuvans trace their ancestry to the same source  
682 population, and either modern-day Tuvans migrated to the Sayan plateau after their split from the  
683 ancestors of modern-day Selkup and Nenets, or the Sayan plateau itself was the ancestral homeland  
684 of these populations. Before later migrations brought Asian genes into this area of South Siberia, the  
685 ancestors of the Samoyeds started to expand north (e.g. it is thought that the northward migration of  
686 the Kulai people of the southeastern part of Western Siberia, which some suggest were the ancestors



687 of the modern-day Samoyedic populations, took place approximately 1500 ya (Pletneva 1987)).  
688 Later admixture with some population of primarily Western Siberian ancestry would have added  
689 further Western Siberian ancestry to the gene pool of the Samoyedic groups, resulting in a younger  
690 date for the Western Siberian gene flow than that estimated for the Tuvans. The date for this mixture  
691 in the Selkup and Nenets of 1,590 ya coincides with what is known as the Great Migration Period,  
692 which took place in Eurasia 1,700-1,200 years ago. This was characterized by massive movements  
693 of people across the continent and could have been precipitated by climate deterioration (Larsen et  
694 al. 2008) or the rise of the Hunnic Empire under Attila the Hun and the invasion of Europe by the  
695 Huns of Central Asia (Kim 2013). Its impact on the genetic landscape of Europe and Asia was  
696 profound (Kim 2013). However, since the inferred date of the Western Siberian admixture is at the  
697 limit of resolution available for the Samoyedic-speakers (Fig.S18E) we cannot rule out that this  
698 admixture is actually older. The Nenets subsequently experienced additional gene flow from some  
699 population of Central Siberian ancestry (such as the Nganasan), which probably happened not  
700 before 1000 ya, after the Nenets settled on the Yamal and Taimyr (Vasiliev 1974). Blocks of  
701 European ancestry that are on average wider in Nenets than anywhere else in Siberia, and a larger  
702 variance around the mean, also suggest additional later gene flow, probably from Russians.

703

704 All our analyses indicate that the Nganasan, the northernmost indigenous people of Siberia, are  
705 quite distinct from the other Samoyedic populations. They lack the Western Siberian and the  
706 European ancestry components, which are both characteristic of the other Samoyedic groups.  
707 Genetically, they appear to be much closer to the neighboring Tungusic speakers and the Yukaghirs  
708 than to the Selkup and even the neighboring Nenets. This leads us to conclude that the Nganasan  
709 have a different genetic history than the other Samoyedic groups and that they were linguistically  
710 (Popov 1956b; Dolgih 1957; Helimskij 2000), but not genetically, assimilated by the Samoyedic  
711 populations who around 1,000 years ago migrated from the south to the northern Arctic.

712

### 713 S3D. Populations of the Russian Far East: Koryaks, Chukchi and Naukan Yupik

714 The Chukotka and Kamchatka Peninsulas were once part of ancient Beringia, a vast late Pleistocene  
715 glacial refugium for modern humans and a center of their dispersal into the New World (Hoffecker  
716 et al. 2014). The oldest reliably dated human remains from Beringia come from the Kamchatka  
717 Peninsula and are 13,000 years old (Goebel et al. 2010). Today, native populations of western  
718 Beringia – in particular, Chukchi, Koryaks and Naukan Yupik – speak distinct languages and differ

719 in their social organization. The Chukchi and Koryaks, who speak languages of the Chukotka-  
720 Kamchatkan family, used to lead a nomadic lifestyle and practice inland reindeer herding in  
721 combination with coastal hunting and fishing as a mode of subsistence. The Naukan Yupik, who  
722 live in close proximity to the Chukchi, speak a Yupik language (which belongs to the Aleut-Yupik-  
723 Inuit language family extending across Alaska, the Canadian Arctic and Greenland) and  
724 traditionally engaged solely in coastal sea mammal hunting (Antropova & Kuznetsova 1956;  
725 Menovschikov 1956).

726

727 The PCA results reveal genetic affinities between the Koryaks, the Chukchi and the Naukan Yupik.  
728 The genetic relationship between the Chukchi and Koryaks is further confirmed by the  
729 ADMIXTURE analysis, which in addition suggests reciprocal gene flow between the Chukchi and  
730 Naukan Yupik, albeit with gene flow predominantly from the Naukan Yupik into the Chukchi.

731

732 Strikingly, both the short-range and long-range genomewide LD is substantially higher in the  
733 Naukan Yupik than in the Chukchi, who often reside in neighboring villages or even the same  
734 settlements. This would imply that in contrast to the Chukchi, the Naukan Yupik underwent an  
735 additional strong bottleneck. Overall, the populations of Chukotka and Kamchatka extensively  
736 share IBD blocks among themselves as well as with the Yukaghirs and the neighbouring Even  
737 subgroups (Fig.5, Fig.S12). The Koryaks are observed to share fewer IBD blocks with the Naukan  
738 Yupik than the Chukchi do. This is probably due to admixture between the Naukan and the  
739 Chukchi, as also indicated by the ADMIXTURE analysis.

740

741 Fitting a multiple regression of genetic distances on geographic distances reveals that the Naukan  
742 Yupik exhibit elevated genetic distances with all other populations (except for the neighbouring  
743 Chukotka-Kamchatkan populations and Greenland Inuit) (Fig.S13). This pattern of generally  
744 elevated genetic distances, along with the genetic proximity to Greenland Inuit as suggested by the  
745 SpaceMix analysis (Fig.S8), is consistent with the viewpoint that the ancestors of the Naukan Yupik  
746 back-migrated to Siberia from the Americas (Tamm et al. 2007; Reich et al. 2012a; Achilli et al.  
747 2013).

748

749 To estimate dates of admixture for the gene flow between the Naukan Yupik and Chukchi, the  
750 Koryaks and Greenland Inuit were taken as proxies for the parental populations. We estimated 7%  
751 of the Far Eastern component in the Naukan Yupik, and 40% Yupik-Inuit ancestry in Chukchi. The

752 estimated time of admixture for the Naukan Yupik is 1,590 ya (CI 1,470 – 1,710), and for the  
753 Chukchi 1,470 ya (CI 1,380 – 1,710), suggesting a single event of reciprocal admixture. The date of  
754 this admixture event is in good accordance with the time of the first appearance of the Neo-Yupik-  
755 Inuit culture in Siberia (Rainey & Ralph 1959) as well as with the first appearance of cultural  
756 complexes in Alaska similar to the ones on Chukotka (Dixon 2013).

757

758 The presence of tribes of hunters and fishers on the Kamchatka and Chukotka Peninsulas is  
759 documented archaeologically from around 13,000 ya (Vasil'ev et al. 2002; Goebel et al. 2010), yet  
760 cultural traits that can be attributed to the putative ancestors of Chukchi and Koryaks do not appear  
761 in the archaeological record until around 3,000 ya (Dikov & Clark 1965). The origin of the Naukan  
762 Yupik is still widely debated. While Paleo-Yupik-Inuit populations migrated into the Bering Sea  
763 region from Siberia around 5,500 ya (Rasmussen et al. 2010), the Naukan Yupik are the descendants  
764 of the pre-Inuit Neo-Yupik-Inuit populations which have been recently shown to have a migration  
765 history independent of Paleo-Yupik-Inuit (Raghavan, DeGiorgio, et al. 2014). While some authors  
766 suggest that the Naukan Yupik are a group that never crossed the Bering Strait, but who persisted in  
767 Siberia (e.g. (Dikov & Clark 1965)), others think that their presence in Chukotka is the result of a  
768 back-migration from North America (Tamm et al. 2007; Reich et al. 2012b; Achilli et al. 2013;  
769 Raghavan, DeGiorgio, et al. 2014). Based on the typology of elements of the harpoon complex, the  
770 distinctive features of the Yupik-Inuit culture are not seen on Chukotka until around 2,200 ya and  
771 the earliest Yupik-Inuit sites along the coasts are dated to around 2,000 ya (Dikov 1977).

772 Radiocarbon dates, however, put the earliest Yupik-Inuit cultures on Chukotka (Old Bering and  
773 Okvik cultures) at ca. 1700-1500 ya (Rainey & Ralph 1959). The estimated date of admixture also  
774 coincides with severe climatic changes in Greenland (McGhee 2001), which could have incited  
775 large-scale migrations and relocation of peoples. It is also in agreement with the age of 1,000-2,000  
776 years estimated for the expansion from Alaska and westward spread of the mtDNA haplogroup A2a,  
777 which is typical of the Yupik-Inuit populations of North America and Siberia (Achilli et al. 2013).

778

779 In order to infer the probable homeland of the Naukan Yupik in the Americas, we recalculated the  
780 regression coefficients (see Main Text), assigning to the Naukan Yupik the geographic coordinates  
781 of a range of locations in Alaska, Canada and Greenland that are home to the current Yupik and  
782 Inuit populations. The largest improvement was achieved when the location of the Naukan Yupik  
783 was assigned to the geographic area circumscribed by the south-west of the Yukon Territories, the  
784 western part of the Northern Territories and British Columbia (see Fig.S17) ( $R_{sq} = 0.613$ ,  $p < 0.001$ ).

785 This area is outside of the region where Yupik and Inuit settlements are attested; however, genetic  
786 admixture with the Chukchi will have reduced the genetic distance between the Naukan Yupik and  
787 Chukotka and thus will also reduce the geographic distance needed to provide the best match  
788 between genetics and geography. Given that from the perspective of geographic distances the  
789 territory of origin we reconstruct lies to the east of Alaska, we can conclude that the origin of the  
790 Naukan Yupik was neither in Chukotka nor in Alaska, but somewhere further east. This conclusion  
791 should be taken with caution however, since we did not consider how strongly this result could be  
792 affected by genetic drift and admixture, both processes shown here to have played a role in the  
793 demographic history of the Naukan Yupik.

794

795 Our results support an origin of the Naukan Yupik in North America and their subsequent back-  
796 migration to Siberia. Furthermore, the dates of reciprocal admixture estimated for the Naukan  
797 Yupik and the Chukchi of ca. 1,500 ya are in good agreement with the time of the first appearance  
798 of the Neo-Yupik-Inuit culture in Siberia. Yet given that the inferred date of admixture is close to  
799 the limit of the resolution available for the Chukchi and the Naukan Yupik (Fig.S18I) we cannot  
800 rule out the possibility that the date of admixture is actually older.

801

### 802 S3E. General comments

803 For many of the Siberian populations, we can identify and distinguish signals of admixture events  
804 shared between populations or population subgroups (e.g. the signal of European admixture shared  
805 by all the Turkic-speaking groups) from local differential gene flow (e.g. the recent Yakut admixture  
806 which affected some, but not all, Even subgroups). We observe what might be the genetic impact of  
807 the powerful Xiongnu empire of ca. 2,000 years ago on the surrounding populations. The Xiongnu  
808 empire was centred around today's Mongolia, but stretched far beyond its current borders. The early  
809 dates of EAsian admixture that we infer for the populations of the Altai and Sayan Mountains  
810 (Altaians and Tuvans) as well as the populations which trace their origin to lake Baikal (Buryats,  
811 Yakuts, and ultimately Dolgans) might well be the genetic legacy of this powerful empire, rather  
812 than reflecting the impact of the much more recent Mongol empire under Gengis Khan and his  
813 successors. Similar early EAsian admixture that might reflect Xiongnu influence is also observed in  
814 all the Tungusic-speaking populations; the fact that this ancestry is shared by all the Tungusic  
815 peoples suggests that the gene flow must have happened before Evens and Evenks (and Oroqen)  
816 diverged and expanded across Siberia. In contrast, the Mongol empire founded by Gengis Khan,

817 which lasted from 1206 to 1368, and was the largest empire in the world, stretching from central  
818 Europe to the Sea of Japan and from southern Siberia to India and Indochina, appears to have had a  
819 genetic impact only on the Buryats - a population in immediate proximity to Mongolia. This is  
820 consistent with the idea that the Mongol empire was maintained via appointed local viceroys with  
821 little if any physical presence of the conquerors. In fact, Russian territories were in subjection to the  
822 Golden Horde (part of the Mongol empire and its successors) for nearly 300 years, yet no evidence  
823 of this was detected in Y chromosome analyses of Russians (Balanovsky et al. 2008), and the  
824 absence of this signal is confirmed here with dense autosomal data (see Text S1D for the analyses  
825 and discussion of the admixture in Russians). Interestingly, it was suggested that the expansion of  
826 the Yakuts from South Siberia (Tokarev & Gurvich 1956; Crubézy et al. 2010) was precipitated by  
827 the advancing armies of Genghis Khan (Pakendorf et al. 2006). Our results are consistent with this  
828 hypothesis: unlike the Turkic-speaking populations of southern Siberia (as well as the Mongolic-  
829 speaking Buryats), the Turkic speakers of northern Siberia show a signal of earlier EAsian gene  
830 flow (possibly associated with the Xiongnu), but not of the later EAsian gene flow that could be  
831 associated with the Mongol expansion under Genghis Khan. The same pattern is observed in all the  
832 Evenk and Even subgroups. Since some researchers suggest that the separation of the Evenks and  
833 Evens from the South Tungusic-speakers (e.g. Hezhen) occurred only ca. 800 years ago (Tugolukov  
834 1980), it is possible that the invading Mongolian armies also forced the Tungusic expansion north  
835 and across Siberia (as the vast territories south and north of the Amur river were conquered and  
836 became part of the Mongol empire).

## 837 References

- Achilli A, Perego UA, Lancioni H, Olivieri A, Gandini F, Hooshiar Kashani B, Battaglia V, Grugni V, Angerhofer N, Rogers MP, et al. 2013. Reconciling migration models to the Americas with the variation of North American native mitogenomes. *Proc Natl Acad Sci U S A*. 110:14308–14313.
- Alekseeva TI, editor. 2002. *Vostochnye slavjane: antropologičeskaja i etničeskaja istorija* [Eastern Slavs: anthropological and ethnic history]. Moscow: Nauchnyj mir.
- Allentoft ME, Sikora M, Sjögren K-G, Rasmussen S, Rasmussen M, Stenderup J, Damgaard PB, Schroeder H, Ahlström T, Vinner L, et al. 2015. Population genomics of Bronze Age Eurasia. *Nature*. 522:167–172.
- Andrés AM, Clark AG, Shimmin L, Boerwinkle E, Sing CF, Hixson JE. 2007. Understanding the accuracy of statistical haplotype inference with sequence data of known phase. *Genet Epidemiol*. 31:659–671.
- Antropova VV, Kuznetsova VG. 1956. Chukchi. In: Levin MG, Potapov LP, editors. *Narody Sibiri* [Peoples of Siberia]. Moscow: Publisher of the Academy of Sciences of the USSR.
- Balanovsky O, Rootsi S, Pshenichnov A, Kivisild T, Churnosov M, Evseeva I, Pocheshkhova E, Boldyreva M, Yankovsky N, Balanovska E, Villems R. 2008. Two Sources of the Russian Patrilineal Heritage in Their Eurasian Context. *Am J Hum Genet*. 82:236–250.
- Barfield TJ. 2001. The shadow empires: imperial state formation along the Chinese-Nomad frontier. In: Alcock S, D’Altroy TN, Morrison KD, Sinopoli CM, editors. *Empires: Perspectives from Archaeology and History*. Cambridge: Cambridge University Press; p. 10–41.
- Brisbin A, Bryc K, Byrnes J, Zakharia F, Omberg L, Degenhardt J, Reynolds A, Ostrer H, Mezey JG, Bustamante CD. 2012. PCAdmix: Principal Components-Based Assignment of Ancestry Along Each Chromosome in Individuals with Admixed Ancestry from Two or More Populations. *Hum Biol*. 84:343–364.
- Browning SR, Browning BL. 2007. Rapid and accurate haplotype phasing and missing-data inference for whole-genome association studies by use of localized haplotype clustering. *Am J Hum Genet*. 81:1084–1097.
- Cheboksarov NN, Bruk SI, Its RF, Stratanovich GG, editors. 1965. *Narody Vostochnoj Asii* [The Peoples of East Asia]. Moscow: Publisher of the Academy of Sciences of the USSR.
- Crubézy E, Amory S, Keyser C, Bouakaze C, Bodner M, Gibert M, Röck A, Parson W, Alexeev A, Ludes B. 2010. Human evolution in Siberia: from frozen bodies to ancient DNA. *BMC Evol Biol*. 10:25.
- Delaneau O, Coulonges C, Zagury J-F. 2008. Shape-IT: new rapid and accurate algorithm for haplotype inference. *BMC Bioinformatics*. 9:540.
- Derenko M, Malyarchuk B, Denisova GA, Wozniak M, Dambueva I, Dorzhu C, Luzina F, Miścicka-Sliwka D, Zakharov I. 2006. Contrasting patterns of Y-chromosome variation in South Siberian populations from Baikal and Altai-Sayan regions. *Hum Genet*. 118:591–604.
- Derenko MV, Grzybowski T, Malyarchuk BA, Dambueva IK, Denisova GA, Czarny J, Dorzhu CM,

- Kakpakov VT, Miścicka-Sliwka D, Woźniak M, Zakharov IA. 2003. Diversity of mitochondrial DNA lineages in South Siberia. *Ann Hum Genet.* 67:391–411.
- Derevianko AP, Clark GH. 1965. New Data on the Archaeology of the Middle Amur. *Arct Anthropol.* 3:136–141.
- Dikov NN. 1977. Arheologičeskije pamjatniki Kamchatki, Chukotki i verhnej Kolymy [Archaeological Sites of Kamchatka, Chukotka and the Upper Kolyma]. Moscow: Nauka.
- Dikov NN, Clark GH. 1965. The Stone Age of Kamchatka and the Chukchi Peninsula in the Light of New Archaeological Data. *Arctic Anthropology.* 3:10–25.
- Dixon EJ. 2013. *Arrows and atlatls: a guide to the archeology of Beringia.* Anchorage: United States Department of the Interior.
- Dolgih BO. 1957. Proischozhenie nganasanov [Origins of the Nganasan]. In: *Sibirskij Etnografičeskij Sbornik [Siberian Ethnographic Collection].* Vol. 1. Moscow: Academy of Sciences of the USSR.
- Duggan AT, Whitten M, Wiebe V, Crawford M, Butthof A, Spitsyn V, Makarov S, Novgorodov I, Osakovsky V, Pakendorf B. 2013. Investigating the Prehistory of Tungusic Peoples of Siberia and the Amur-Ussuri Region with Complete mtDNA Genome Sequences and Y-chromosomal Markers. *PLoS ONE.* 8:e83570.
- Goebel T, Slobodin SB, Waters MR. 2010. New dates from Ushki-1, Kamchatka, confirm 13,000 cal BP age for earliest Paleolithic occupation. *J Archaeol Sci.* 37:2640–2649.
- González-Ruiz M, Santos C, Jordana X, Simón M, Lalueza-Fox C, Gigli E, Aluja MP, Malgosa A. 2012. Tracing the Origin of the East-West Population Admixture in the Altai Region (Central Asia). *PLoS ONE.* 7:e48904.
- Haak W, Lazaridis I, Patterson N, Rohland N, Mallick S, Llamas B, Brandt G, Nordenfelt S, Harney E, Stewardson K, et al. 2015. Massive migration from the steppe was a source for Indo-European languages in Europe. *Nature.* 522:207–211.
- Helimskij E. 2000. *Komparativistika, Uralistika. Lekcii i Statji [Comparativism, Uralistics. Lectures and Articles].* Moscow: Jazyki Slavjanskoj Kultury [Languages of the Slavic Culture].
- Hoffecker JF, Elias SA, O'Rourke DH. 2014. Out of Beringia? *Science.* 343:979–980.
- International HapMap Consortium, Frazer KA, Ballinger DG, Cox DR, Hinds DA, Stuve LL, Gibbs RA, Belmont JW, Boudreau A, Hardenbol P, et al. 2007. A second generation human haplotype map of over 3.1 million SNPs. *Nature.* 449:851–861.
- Ivanov SV, Levin MG, Smoljak AV. 1956. Nanaicy [Nanai]. In: Levin MG, Potapov LP, editors. *Narody Sibiri [Peoples of Siberia].* Moscow: Publisher of the Academy of Sciences of the USSR.
- Keyser-Tracqui C, Crubezy E, Ludes B. 2003. Nuclear and Mitochondrial DNA Analysis of a 2,000-Year-Old Necropolis in the Egiin Gol Valley of Mongolia. *Am J Hum Genet.* 73:247–260.
- Khrunin AV, Khokhrin DV, Filippova IN, Esko T, Nelis M, Bebyakova NA, Bolotova NL, Klovins J, Nikitina-Zake L, Rehnström K, et al. 2013. A genome-wide analysis of populations from

- European Russia reveals a new pole of genetic diversity in northern Europe. *PloS One*. 8:e58552.
- Kim HJ. 2013. *The Huns, Rome and the Birth of Europe*. Cambridge : New York: Cambridge University Press.
- Konovalov P. 1976. *Khunnu v Zabaikal'e [The Xiongnu in the Trans-Baikal Region]*. Ulan-Ude: Nauka.
- Lao O, Lu TT, Nothnagel M, Junge O, Freitag-Wolf S, Caliebe A, Balasckakova M, Bertranpetit J, Bindoff LA, Comas D, et al. 2008. Correlation between genetic and geographic structure in Europe. *Curr Biol CB*. 18:1241–1248.
- Larsen LB, Vinther BM, Briffa KR, Melvin TM, Clausen HB, Jones PD, Siggaard-Andersen M-L, Hammer CU, Eronen M, Grudd H, et al. 2008. New ice core evidence for a volcanic cause of the A.D. 536 dust veil. *Geophys Res Lett*. 35:L04708.
- Levin MG. 1956. Evens. In: Levin MG, Potapov LP, editors. *Narody Sibiri [Peoples of Siberia]*. Moscow: Publisher of the Academy of Sciences of the USSR.
- Li C, Li H, Cui Y, Xie C, Cai D, Li W, Mair VH, Xu Z, Zhang Q, Abuduresule I, et al. 2010. Evidence that a West-East admixed population lived in the Tarim Basin as early as the early Bronze Age. *BMC Biol*. 8:15.
- López Herráez D, Bauchet M, Tang K, Theunert C, Pugach I, Li J, Nandineni MR, Gross A, Scholz M, Stoneking M. 2009. Genetic Variation and Recent Positive Selection in Worldwide Human Populations: Evidence from Nearly 1 Million SNPs. *PLoS ONE*. 4:e7888.
- McGhee R. 2001. *Ancient People of the Arctic*. Reprint ed. Vancouver, BC: University of Washington Press.
- Menovschikov GA. 1956. Eskimosy [Eskimo people]. In: Levin MG, Potapov LP, editors. *Narody Sibiri [Peoples of Siberia]*. Moscow: Publisher of the Academy of Sciences of the USSR.
- Miniaev S. 2001. Art and Archaeology of the Xiongnu: New Discoveries in Russia. *Circle of Inner Asia Art Newsletter* 14:3–9.
- Mooder KP, Schurr TG, Bamforth FJ, Bazaliiski VI, Savel'ev NA. 2006. Population affinities of Neolithic Siberians: a snapshot from prehistoric Lake Baikal. *Am J Phys Anthropol*. 129:349–361.
- Naumov IV. 2006. *The History of Siberia*. London: Routledge
- Nikolaev RV. 2004. Prehistoric cultural links along the Yenisei: Revelations from a bronze idol. In: Vajda EJ, editor. *Languages and Prehistory in Central Siberia*. [Amsterdam]: John Benjamins Publishing Company; p. 257–262.
- Novembre J, Johnson T, Bryc K, Kutalik Z, Boyko AR, Auton A, Indap A, King KS, Bergmann S, Nelson MR, et al. 2008. Genes mirror geography within Europe. *Nature*. 456:98–101.
- Pakendorf B, Morar B, Tarskaia LA, Kayser M, Soodyall H, Rodewald A, Stoneking M. 2002. Y-chromosomal evidence for a strong reduction in male population size of Yakuts. *Hum Genet*. 110:198–200.



- Pakendorf B, Novgorodov IN, Osakovskij VL, Danilova AP, Protod'jakonov AP, Stoneking M. 2006. Investigating the effects of prehistoric migrations in Siberia: genetic variation and the origins of Yakuts. *Hum Genet.* 120:334–353.
- Pakendorf B, Novgorodov IN, Osakovskij VL, Stoneking M. 2007. Mating patterns amongst Siberian reindeer herders: inferences from mtDNA and Y-chromosomal analyses. *Am J Phys Anthropol.* 133:1013–1027.
- Palamara PF, Lencz T, Darvasi A, Pe'er I. 2012. Length Distributions of Identity by Descent Reveal Fine-Scale Demographic History. *Am J Hum Genet.* 91:809–822.
- Patterson NJ, Moorjani P, Luo Y, Mallick S, Rohland N, Zhan Y, Genschoreck T, Webster T, Reich D. 2012. Ancient Admixture in Human History. *Genetics.* 192(3):1065-93
- Pickrell JK, Pritchard JK. 2012. Inference of Population Splits and Mixtures from Genome-Wide Allele Frequency Data. *PLoS Genet.* 8:e1002967.
- Pletneva LM, editor. 1987. *Smena kultur i migraciii v Zapadnoj Sibiri* [Replacement of cultures and migrations in Western Siberia] Tomsk: Izdatelstvo TGU [Tomsk State University Publisher]
- Popov AA. 1956a. Dolgans. In: Levin MG, Potapov LP, editors. *Narody Sibiri* [Peoples of Siberia]. Moscow: Publisher of the Academy of Sciences of the USSR.
- Popov AA. 1956b. Nganasans. In: Levin MG, Potapov LP, editors. *Narody Sibiri* [Peoples of Siberia]. Moscow: Publisher of the Academy of Sciences of the USSR.
- Popov AN, Tabarev AV. 2008. Neolithic Cultures of the Russian Far East. *Turk Acad Sci J Archaeol.* 11:21–34.
- Pugach I, Matveyev R, Wollstein A, Kayser M, Stoneking M. 2011. Dating the age of admixture via wavelet transform analysis of genome-wide data. *Genome Biol.* 12:R19.
- Raghavan M, DeGiorgio M, Albrechtsen A, Moltke I, Skoglund P, Korneliussen TS, Grønnow B, Appelt M, Gulløv HC, Friesen TM, et al. 2014. The genetic prehistory of the New World Arctic. *Science.* 345:1255832.
- Raghavan M, Skoglund P, Graf KE, Metspalu M, Albrechtsen A, Moltke I, Rasmussen S, Stafford Jr TW, Orlando L, Metspalu E, et al. 2014. Upper Palaeolithic Siberian genome reveals dual ancestry of Native Americans. *Nature.* 505:87–91.
- Rainey F, Ralph E. 1959. Radiocarbon Dating in the Arctic. *American Antiquity.* 24:365–374.
- Rasmussen M, Li Y, Lindgreen S, Pedersen JS, Albrechtsen A, Moltke I, Metspalu M, Metspalu E, Kivisild T, Gupta R, et al. 2010. Ancient human genome sequence of an extinct Palaeo-Eskimo. *Nature.* 463:757–762.
- Reich D, Patterson N, Campbell D, Tandon A, Mazieres S, Ray N, Parra MV, Rojas W, Duque C, Mesa N, et al. 2012a. Reconstructing Native American population history. *Nature.* 488:370–374.
- Reich D, Patterson N, Campbell D, Tandon A, Mazieres S, Ray N, Parra MV, Rojas W, Duque C, Mesa N, et al. 2012b. Reconstructing Native American population history. *Nature.* 488:370–374.

- Rudenko S. 1962. Kultura hunnov i noinulinkskie kurgany [Xiongnu Culture and Noin Ula kurgans]. Leningrad: Publisher of the Academy of Sciences of the USSR.
- Savinov DG, Podolskiy ML, editors. 2006. Okunevskij Sbornik: Kultura i ee okruzenie 2 [Okunev collection: Culture and its surroundings 2]. Saint Petersburg: SPbGU [Publisher of the Saint Petersburg State University].
- Sinor D. 1990. The Cambridge History of Early Inner Asia. Cambridge: Cambridge University Press.
- Sokolova LA. 2007. Okunev cultural tradition in the stratigraphic aspect. *Archaeol Ethnol Anthropol Eurasia*. 30:41–51.
- Solodovnikov KN. 2003. Materialy k antropologii afanasievskoj kultury [Materials to anthropology of Afanasevo culture]. *Drevnosti Altaja [Antiquities of Altai]*. 10:3–27.
- Stapert E. 2013. Contact-induced change in Dolgan: an investigation into the role of linguistic data for the reconstruction of a people's (pre)history. PhD Dissertation. Utrecht: LOT.
- Tamm E, Kivisild T, Reidla M, Metspalu M, Smith DG, Mulligan CJ, Bravi CM, Rickards O, Martinez-Labarga C, Khusnutdinova EK, et al. 2007. Beringian Standstill and Spread of Native American Founders. *PLoS ONE*. 2:e829.
- Tang H, Coram M, Wang P, Zhu X, Risch N. 2006. Reconstructing genetic ancestry blocks in admixed individuals. *Am J Hum Genet*. 79:1–12.
- Taskin V. 1968. Materialy po istorii siunnu. (Po kitaiskim istochnikam) [Materials on the history of Xiongnu. (According to Chinese sources)]. Moscow: Nauka.
- Tokarev SA, Gurvich IS. 1956. Yakuty [Yakuts]. In: Levin MG, Potapov LP, editors. *Narody Sibiri [Peoples of Siberia]*. Moscow: Publisher of the Academy of Sciences of the USSR.
- Tugolukov VA. 1980. Ėtničeskie korni tungusov [Ethnic roots of the Tungus people]. In: Gurvich IS, editor. *Ėtnogenez Narodov Severa [Ethnogenesis of the Peoples of the North]*. Moscow: Nauka; p. 152–176.
- Tumen D. 2008. Anthropology of Archaeological populations from Inner Asia. *Mong J Anthropol Ethnol*. 4:162–183.
- Vajda EJ. 2009. The Languages of Siberia. *Language and Linguistics Compass*. 3:424–440.
- Vasilevič G. 1969. Ėvenki. Istoriko-ėtnografičeskie očerki (XVIII-načalo XX v.) [Evenks. Historico-ethnographic sketches (XVIII-beg of the XXC)]. Leningrad: Nauka
- Vasilevich GM. 1956. Evenks. In: Levin MG, Potapov LP, editors. *Narody Sibiri [Peoples of Siberia]*. Moscow: Publisher of the Academy of Sciences of the USSR.
- Vasil'ev SA, Kuzmin YV, Orlova LA, Dementiev VN. 2002. Radiocarbon-based chronology of the Paleolithic in Siberia and its relevance to the peopling of the New World. *Radiocarbon*. 44:503–530.
- Vasiliev VI. 1974. K probleme etnogeneza severosamodijskih narodov [On the question of ethnogenesis of the Samoyedic peoples of the North]. In: Gurvich IS, editor. *Socialnaja organizacija*

i kultura narodov severa [Social organization and culture of the peoples of the North]. Moscow: Nauka; p. 133–175.

Weber AW, Bettinger R. 2010. Middle Holocene hunter-gatherers of Cis-Baikal, Siberia: An overview for the new century. *J Anthropol Archaeol.* 29:491–506.

Zlojutro M, Tarskaia LA, Sorensen M, Snodgrass JJ, Leonard WR, Crawford MH. 2009. Coalescent simulations of Yakut mtDNA variation suggest small founding population. *Am J Phys Anthropol.* 139:474–482.

**Table S1 Populations included in the study**

Populations are grouped by linguistic affiliation

| population             | subgroup      | N  | subsistence                | provenance           | latitude and longitude coords      |
|------------------------|---------------|----|----------------------------|----------------------|------------------------------------|
| <b>Turkic</b>          |               |    |                            |                      |                                    |
| Altaians               |               | 12 | pastoralist (horse/cattle) | Rasmussen et al 2010 | 51.57N<br>85.59E<br>(Gorno-Altisk) |
| Tuvans                 |               | 16 | pastoralist (horse/cattle) | Rasmussen et al 2010 | 51.43N<br>94.27E (Kyzyl)           |
| Yakuts                 |               |    | pastoralist (horse/cattle) |                      |                                    |
|                        | CEPH          | 24 |                            | Li et al 2008        | 62.98N<br>129.50E                  |
|                        | Verhoyansk    | 8  |                            | this study           | 68.40N<br>136.14E                  |
|                        | not specified | 13 |                            | Reich et al 2012     |                                    |
| Dolgans                |               |    | H-G/<br>reindeer herder    |                      |                                    |
|                        | Taimyr        | 10 |                            | this study           | 69.21N<br>86.13E                   |
|                        | Anabar        | 10 |                            | this study           | 72.48N<br>113.14E                  |
| <b>Tungusic-Manchu</b> |               |    |                            |                      |                                    |
| <b>N.Tungusic</b>      |               |    |                            |                      |                                    |
| Evens                  |               |    | H-G/<br>reindeer herder    | this study           |                                    |
|                        | Sakkyryyr     | 7  |                            |                      | 67.48N<br>130.24E                  |
|                        | Sebjan        | 10 |                            |                      | 64.24N<br>126.16E                  |
|                        | Tompo         | 10 |                            |                      | 64.39N<br>135.57E                  |
|                        | Berezovka     | 6  |                            |                      | 67.30N<br>154.40E                  |
|                        | Kamchatka     | 5  |                            |                      | 55.55N<br>158.41E<br>(Esso)        |
| Evenks                 |               |    | H-G/<br>reindeer herder    | this study           |                                    |
|                        | Taimyr        | 5  |                            |                      | 68.18N                             |

|               |                |    |                            |                      |                                    |
|---------------|----------------|----|----------------------------|----------------------|------------------------------------|
|               |                |    |                            |                      | 88.45E<br>(Khantayskoye Lake)      |
|               | Stony-Tunguska | 6  |                            |                      | 61.47N<br>93.35E                   |
| Oroqen        |                | 10 |                            | Li et al 2008        | 50.43N<br>126.50E                  |
| S.Tungusic    |                |    |                            |                      |                                    |
| Hezhen        |                | 9  |                            | Li et al 2008        | 47.50N<br>133.50E                  |
| Manchu        |                |    |                            |                      |                                    |
| Xibo          |                | 9  |                            | Li et al 2008        | 43.50N<br>81.50E                   |
| Mongolic      |                |    |                            |                      |                                    |
| Mongolians    |                | 10 | pastoralist (horse/cattle) | Li et al 2008        | 45N<br>111E                        |
| Buryats       |                | 19 | pastoralist (horse/cattle) | Rasmussen et al 2010 | 51.50N<br>107.36E                  |
| Daur          |                | 9  |                            | Li et al 2008        | 48.50N<br>124.00E                  |
| Tu Mongolians |                | 10 |                            | Li et al 2008        | 36N<br>101E                        |
| Uralic        |                |    |                            |                      |                                    |
| N.Samoyedic   |                |    |                            |                      |                                    |
| Nganasan      |                |    | H-G                        |                      |                                    |
|               |                | 10 |                            | Rasmussen et al 2010 | 71.60N<br>92.49E<br>(Ust-Avam)     |
|               |                | 14 |                            | Reich et al 2012     | n/a                                |
| Nenets        |                |    | reindeer herder            |                      |                                    |
|               | Taimyr         | 6  |                            | this study           | 69.21N<br>86.13E                   |
|               | Yamal          | 6  |                            | this study           | 69.42N<br>70.36E                   |
|               | not specified  | 3  |                            | Reich et al 2012     | n/a                                |
| S.Samoyedic   |                |    |                            |                      |                                    |
| Selkup        |                | 9  | H-G/<br>reindeer herder    | Rasmussen et al 2010 | 65.42N<br>82.27E<br>(Krasnoselkup) |
| Ugric         |                |    |                            |                      |                                    |
| Khanty        |                | 35 |                            | Reich et al          | 61N                                |

|                            |      |    |                         |                         |                                              |
|----------------------------|------|----|-------------------------|-------------------------|----------------------------------------------|
|                            |      |    |                         | 2012                    | 69E<br>(Khanty-<br>Mansiysk,<br>Ugry)        |
| <b>Chukotko-Kamchatkan</b> |      |    |                         |                         |                                              |
| Chukchi                    |      |    | H-G/<br>reindeer herder |                         |                                              |
|                            |      | 9  |                         | Rasmussen et<br>al 2010 | 64.44N<br>177.30E<br>(Anadyr)                |
|                            |      | 19 |                         | Reich et al<br>2012     | n/a                                          |
| Koryaks                    |      |    | H-G/<br>reindeer herder | Rasmussen et<br>al 2010 | 55.55N<br>158.41E<br>(Palana)                |
| <b>Eskimo-Aleut</b>        |      |    |                         |                         |                                              |
| <b>Yupik</b>               |      |    |                         |                         |                                              |
| Naukan Yupik               |      | 16 |                         | Reich et al<br>2012     | 64.30N<br>-173.01E<br>(Novoe<br>Chaplino)    |
| <b>Inuit</b>               |      |    |                         |                         |                                              |
| Greenland                  |      |    |                         | Reich et al<br>2012     |                                              |
|                            | east | 7  |                         |                         | 65.38N<br>-37.40E<br>(Tasiliak)              |
|                            | west | 8  |                         |                         | 64.10N<br>-51.43E<br>(Nuuk)                  |
| <b>Aleut</b>               |      |    |                         |                         |                                              |
| Aleuts                     |      | 8  |                         | Reich et al<br>2012     | 53.40N<br>-166.38E<br>(Unalaska<br>island)   |
| <b>isolate language</b>    |      |    |                         |                         |                                              |
| Yukaghirs                  |      | 13 |                         | Reich et al<br>2012     | 68.52N<br>161.27E<br>(upper Kolyma<br>River) |
| <b>Yeniseic</b>            |      |    |                         |                         |                                              |
| Kets                       |      | 2  |                         | Rasmussen et<br>al 2010 | 62.29N<br>86.17E<br>(Kellog)                 |
| <b>Indo-European</b>       |      |    |                         |                         |                                              |

| Slavic       |         |    |  |               |                   |
|--------------|---------|----|--|---------------|-------------------|
| Russians     |         | 25 |  | Li et al 2008 | 61N<br>40E        |
| Romance      |         |    |  |               |                   |
| French       |         | 29 |  | Li et al 2008 | 46N<br>2E         |
| Italian      |         |    |  | Li et al 2008 |                   |
|              | Bergamo | 13 |  |               | 46N<br>10E        |
|              | Tuscan  | 8  |  |               | 43.48N<br>11.14E  |
| Sino-Tibetan |         |    |  |               |                   |
| Han Chinese  |         | 44 |  | Li et al 2008 | 32.27N<br>114.00E |
| Japonic      |         |    |  |               |                   |
| Japanese     |         | 28 |  | Li et al 2008 | 38N<br>138E       |

Table S2. Results of f3 test for admixture

| f3(C; A, B)                          | f3           | SE           | Z-score  |
|--------------------------------------|--------------|--------------|----------|
| <i>Mongolians</i>                    |              |              |          |
| Mongolians;Nenets,Han                | -0.00203283  | 7.56683E-005 | -26.865  |
| Mongolians;Han,Dolgans               | -0.0016677   | 6.57616E-005 | -25.3597 |
| Mongolians;Han,Nganasan              | -0.00205561  | 8.15037E-005 | -25.2211 |
| Mongolians;Khanty,Han                | -0.00194514  | 7.73164E-005 | -25.1582 |
| Mongolians;Han,Evens                 | -0.00177316  | 0.000070515  | -25.1458 |
| Mongolians;Han,Yakuts                | -0.00148198  | 6.25567E-005 | -23.6902 |
| Mongolians;Evenks,Han                | -0.00190545  | 8.14375E-005 | -23.3976 |
| Mongolians;Evens_Kamchatka,Han       | -0.00180648  | 7.99792E-005 | -22.5869 |
| Mongolians;Selkup,Han                | -0.00185174  | 8.36972E-005 | -22.1243 |
| Mongolians;Han,Buryats               | -0.00124601  | 0.000063368  | -19.6631 |
| Mongolians;Chukchi,Han               | -0.00150967  | 7.70974E-005 | -19.5813 |
| Mongolians;Tuvans,Han                | -0.00128528  | 6.68877E-005 | -19.2154 |
| Mongolians;Khanty,Japanese           | -0.00155012  | 8.21946E-005 | -18.8591 |
| Mongolians;Russians,Han              | -0.00192452  | 0.000102687  | -18.7416 |
| Mongolians;Altaians,Han              | -0.00129863  | 6.94591E-005 | -18.6963 |
| Mongolians;Russians,Japanese         | -0.00198237  | 0.000106664  | -18.5853 |
| Mongolians;Nenets,Japanese           | -0.00149648  | 8.20408E-005 | -18.2407 |
| Mongolians;French,Japanese           | -0.00199481  | 0.000112454  | -17.7389 |
| Mongolians;Aleutian,Han              | -0.00171328  | 9.66813E-005 | -17.7209 |
| Mongolians;French,Han                | -0.00188307  | 0.000108547  | -17.3479 |
| Mongolians;Italy,Japanese            | -0.0019752   | 0.000114607  | -17.2346 |
| Mongolians;Han,Greenland_Inuits      | -0.0015429   | 9.08236E-005 | -16.9879 |
| Mongolians;Koryaks,Han               | -0.00151785  | 9.05881E-005 | -16.7555 |
| Mongolians;Han,Kets                  | -0.00192594  | 0.000115468  | -16.6794 |
| Mongolians;Italy,Han                 | -0.0018147   | 0.000110797  | -16.3786 |
| Mongolians;Selkup,Japanese           | -0.00142815  | 8.91079E-005 | -16.0272 |
| Mongolians;Aleutian,Japanese         | -0.00162987  | 0.000101934  | -15.9895 |
| Mongolians;Naukan_Yupik,Han          | -0.00144171  | 0.000092451  | -15.5943 |
| Mongolians;Nganasan,Japanese         | -0.00132159  | 9.03759E-005 | -14.6232 |
| Mongolians;Dolgans,Japanese          | -0.00105656  | 7.31569E-005 | -14.4424 |
| Mongolians;Japanese,Yakuts           | -0.000947684 | 6.76492E-005 | -14.0088 |
| Mongolians;Altaians,Japanese         | -0.00102939  | 7.48561E-005 | -13.7516 |
| Mongolians;Evens_Kamchatka,Tu        | -0.00122229  | 9.46059E-005 | -12.9198 |
| Mongolians;Evenks,Japanese           | -0.00112849  | 8.80864E-005 | -12.8112 |
| Mongolians;Evenks,Tu                 | -0.00122121  | 9.64571E-005 | -12.6607 |
| Mongolians;Tu,Evens                  | -0.00108609  | 8.59093E-005 | -12.6423 |
| Mongolians;Japanese,Evens            | -0.00098192  | 0.000078891  | -12.4465 |
| Mongolians;Tu,Nganasan               | -0.00123442  | 0.000100951  | -12.2279 |
| Mongolians;French,Hezhen             | -0.00154933  | 0.000127924  | -12.1113 |
| Mongolians;Kets,Japanese             | -0.00150607  | 0.000125018  | -12.0468 |
| Mongolians;Japanese,Buryats          | -0.000817357 | 6.82116E-005 | -11.9827 |
| Mongolians;Tuvans,Japanese           | -0.000855717 | 7.16284E-005 | -11.9466 |
| Mongolians;Hezhen,Russians           | -0.00137954  | 0.000123323  | -11.1864 |
| Mongolians;Italy,Hezhen              | -0.00146874  | 0.00013178   | -11.1454 |
| Mongolians;Evens_Kamchatka,Japanese  | -0.000911516 | 8.99939E-005 | -10.1286 |
| Mongolians;Greenland_Inuits,Japanese | -0.00101713  | 0.000101462  | -10.0247 |
| Mongolians;Tu,Dolgans                | -0.000804938 | 0.000082479  | -9.75931 |
| Mongolians;Italy,Oroqen              | -0.00134387  | 0.000140163  | -9.58796 |
| Mongolians;French,Oroqen             | -0.00129371  | 0.000137547  | -9.40564 |
| Mongolians;Oroqen,Han                | -0.000704691 | 7.59584E-005 | -9.27733 |
| Mongolians;Tu,Yakuts                 | -0.000683798 | 7.81151E-005 | -8.75372 |



|                                   |              |              |          |
|-----------------------------------|--------------|--------------|----------|
| Mongolians;Chukchi,Japanese       | -0.000771071 | 8.83725E-005 | -8.72523 |
| Mongolians;Aleutian,Hezhen        | -0.000986496 | 0.00011622   | -8.4882  |
| Mongolians;Tu,Nenets              | -0.0007909   | 9.50468E-005 | -8.32117 |
| Mongolians;Russians,Daur          | -0.0010172   | 0.000122783  | -8.28453 |
| Mongolians;French,Daur            | -0.00109001  | 0.000132857  | -8.20437 |
| Mongolians;Tu,Chukchi             | -0.000785463 | 9.59923E-005 | -8.18256 |
| Mongolians;Italy,Daur             | -0.00106667  | 0.000135255  | -7.88635 |
| Mongolians;Tu,Buryats             | -0.000577541 | 7.38921E-005 | -7.81601 |
| Mongolians;Russians,Oroqen        | -0.000996154 | 0.000129938  | -7.66639 |
| Mongolians;San,Japanese           | -0.000973248 | 0.000131143  | -7.42128 |
| Mongolians;Oroqen,San             | -0.00110598  | 0.000152776  | -7.2392  |
| Mongolians;Tu,Oroqen              | -0.000599674 | 8.30777E-005 | -7.21823 |
| Mongolians;Aleutian,Daur          | -0.000829078 | 0.00011521   | -7.19627 |
| Mongolians;Koryaks,Japanese       | -0.000708176 | 9.85686E-005 | -7.1846  |
| Mongolians;Naukan_Yupik,Japanese  | -0.000723799 | 0.000101859  | -7.10589 |
| Mongolians;Han,San                | -0.000868338 | 0.000122565  | -7.08474 |
| Mongolians;Italy,Evens_Kamchatka  | -0.00109967  | 0.00016207   | -6.78519 |
| Mongolians;Evens_Kamchatka,French | -0.00105881  | 0.000160365  | -6.60254 |
| Mongolians;Tu,Koryaks             | -0.000766038 | 0.000116219  | -6.59132 |
| Mongolians;Hezhen,San             | -0.000973257 | 0.000155205  | -6.2708  |
| Mongolians;Tu,Tuvans              | -0.000480562 | 7.96363E-005 | -6.03445 |
| Mongolians;Xibo,Nganasan          | -0.000603146 | 0.000102442  | -5.8877  |
| Mongolians;Evens_Kamchatka,San    | -0.00106162  | 0.000187429  | -5.66409 |
| Mongolians;Tu,Naukan_Yupik        | -0.000637049 | 0.000112914  | -5.64189 |
| Mongolians;Daur,San               | -0.000804923 | 0.000148127  | -5.43402 |
| Mongolians;Aleutian,Oroqen        | -0.000657193 | 0.000125696  | -5.22843 |
| Mongolians;Tu,Selkup              | -0.000496559 | 0.000102453  | -4.84672 |
| Mongolians;Oroqen,Japanese        | -0.000373939 | 7.75205E-005 | -4.82375 |
| Mongolians;Tu,Khanty              | -0.000452478 | 9.73107E-005 | -4.64983 |
| Mongolians;Khanty,Hezhen          | -0.000465668 | 0.00010139   | -4.59285 |
| Mongolians;Nenets,Xibo            | -0.000435343 | 9.48764E-005 | -4.58853 |
| Mongolians;Khanty,Daur            | -0.000447952 | 0.000097856  | -4.57766 |
| Mongolians;Tu,Greenland_Inuits    | -0.00046398  | 0.000110374  | -4.20371 |
| Mongolians;Evens_Kamchatka,Xibo   | -0.000370526 | 9.99465E-005 | -3.70725 |
| Mongolians;Han,Daur               | -0.000279092 | 7.60835E-005 | -3.66823 |
| Mongolians;Tu,Altaians            | -0.000304437 | 8.35248E-005 | -3.64487 |
| Mongolians;Tu,Kets                | -0.000487472 | 0.000137411  | -3.54754 |
| Mongolians;Xibo,Evens             | -0.000304361 | 8.94783E-005 | -3.4015  |
| Mongolians;Evenks,Xibo            | -0.000337556 | 9.93035E-005 | -3.39924 |
| Mongolians;Xibo,Buryats           | -0.000259739 | 7.76769E-005 | -3.34384 |
| Mongolians;Evenks,Italy           | -0.000525914 | 0.000161345  | -3.25955 |
| Mongolians;Tu,Daur                | -0.000262449 | 8.21467E-005 | -3.19489 |
| Mongolians;Daur,Greenland_Inuits  | -0.000336688 | 0.000109379  | -3.07818 |

### Tuvans

|                                 |             |             |          |
|---------------------------------|-------------|-------------|----------|
| Tuvans;Evenks,French            | -0.00351823 | 0.000132461 | -26.5606 |
| Tuvans;Evenks,Italy             | -0.00349685 | 0.000133588 | -26.1763 |
| Tuvans;Evens_Kamchatka,French   | -0.00352153 | 0.000138618 | -25.4045 |
| Tuvans;Italy,Evens_Kamchatka    | -0.00344188 | 0.000138419 | -24.8657 |
| Tuvans;French,Evens             | -0.00280722 | 0.000116858 | -24.0224 |
| Tuvans;Italy,Evens              | -0.00274746 | 0.000117941 | -23.2951 |
| Tuvans;Evenks,Russians          | -0.00279317 | 0.000122864 | -22.7338 |
| Tuvans;Evens_Kamchatka,Russians | -0.00278437 | 0.000129177 | -21.5547 |
| Tuvans;Italy,Nganasan           | -0.00292947 | 0.000138987 | -21.0773 |
| Tuvans;French,Nganasan          | -0.00285078 | 0.000139116 | -20.4922 |
| Tuvans;Russians,Evens           | -0.00215977 | 0.000109195 | -19.7791 |

|                                 |              |              |          |
|---------------------------------|--------------|--------------|----------|
| Tuvans;French,Oroqen            | -0.00249565  | 0.000127756  | -19.5346 |
| Tuvans;Russians,Oroqen          | -0.00215705  | 0.000117628  | -18.3379 |
| Tuvans;Italy,Oroqen             | -0.0024253   | 0.000132671  | -18.2805 |
| Tuvans;French,Hezhen            | -0.00209101  | 0.000132875  | -15.7367 |
| Tuvans;Russians,Nganasan        | -0.00201938  | 0.000131374  | -15.3712 |
| Tuvans;Hezhen,Russians          | -0.00188018  | 0.000124547  | -15.0962 |
| Tuvans;Russians,Japanese        | -0.00166071  | 0.000111466  | -14.8989 |
| Tuvans;French,Japanese          | -0.00171419  | 0.000120901  | -14.1785 |
| Tuvans;Italy,Hezhen             | -0.00188992  | 0.000135434  | -13.9545 |
| Tuvans;Evenks,San               | -0.00207509  | 0.000153857  | -13.4871 |
| Tuvans;Evenks,Aleutian          | -0.00161465  | 0.000122294  | -13.203  |
| Tuvans;Italy,Japanese           | -0.00157407  | 0.000123312  | -12.7649 |
| Tuvans;Russians,Daur            | -0.00154407  | 0.000125179  | -12.3349 |
| Tuvans;French,Daur              | -0.00165793  | 0.000136472  | -12.1485 |
| Tuvans;San,Nganasan             | -0.00191945  | 0.00016131   | -11.8991 |
| Tuvans;Evens_Kamchatka,San      | -0.0019772   | 0.000172489  | -11.4627 |
| Tuvans;Italy,Daur               | -0.00151408  | 0.000137762  | -10.9906 |
| Tuvans;Russians,Han             | -0.0011733   | 0.000115588  | -10.1506 |
| Tuvans;Aleutian,Oroqen          | -0.00117208  | 0.00011621   | -10.0859 |
| Tuvans;San,Evens                | -0.00138588  | 0.000138232  | -10.0257 |
| Tuvans;Evens_Kamchatka,Aleutian | -0.00123093  | 0.000127534  | -9.65182 |
| Tuvans;Aleutian,Evens           | -0.00102204  | 0.000106484  | -9.59808 |
| Tuvans;Nenets,Han               | -0.000772016 | 8.27826E-005 | -9.32581 |
| Tuvans;French,Han               | -0.0011729   | 0.000125862  | -9.31889 |
| Tuvans;Aleutian,Nganasan        | -0.00113424  | 0.000126345  | -8.97729 |
| Tuvans;Nenets,Japanese          | -0.000665226 | 8.31508E-005 | -8.00023 |
| Tuvans;Italy,Han                | -0.000984016 | 0.000126241  | -7.79472 |
| Tuvans;Khanty,Japanese          | -0.000670809 | 8.69862E-005 | -7.71167 |
| Tuvans;Khanty,Han               | -0.000636269 | 8.72601E-005 | -7.29164 |
| Tuvans;Selkup,Han               | -0.000615378 | 8.89051E-005 | -6.92174 |
| Tuvans;Selkup,Japanese          | -0.000621345 | 9.02605E-005 | -6.88391 |
| Tuvans;Aleutian,Hezhen          | -0.000841124 | 0.000122282  | -6.87856 |
| Tuvans;Aleutian,Daur            | -0.000709945 | 0.000118949  | -5.96848 |
| Tuvans;Aleutian,Japanese        | -0.0006622   | 0.00011155   | -5.93637 |
| Tuvans;Oroqen,San               | -0.000760781 | 0.000142135  | -5.35252 |
| Tuvans;Han,Nganasan             | -0.000458496 | 8.98503E-005 | -5.10289 |
| Tuvans;Italy,Koryaks            | -0.000813264 | 0.000165402  | -4.91689 |
| Tuvans;Tu,Nganasan              | -0.000442015 | 9.98403E-005 | -4.42722 |
| Tuvans;Mongolians,Russians      | -0.000534055 | 0.000120857  | -4.41889 |
| Tuvans;Kets,Japanese            | -0.000543921 | 0.00012361   | -4.40029 |
| Tuvans;Khanty,Daur              | -0.000417179 | 9.53389E-005 | -4.37575 |
| Tuvans;Mongolians,French        | -0.000575102 | 0.000131962  | -4.35808 |
| Tuvans;Han,Kets                 | -0.000534226 | 0.000124328  | -4.29692 |
| Tuvans;Khanty,Hezhen            | -0.000408656 | 9.87608E-005 | -4.13783 |
| Tuvans;French,Koryaks           | -0.000681166 | 0.000165925  | -4.10526 |
| Tuvans;Tu,Nenets                | -0.000334802 | 9.04636E-005 | -3.70096 |
| Tuvans;Italy,Mongolians         | -0.000454592 | 0.000133176  | -3.41346 |
| Tuvans;Selkup,Daur              | -0.00032485  | 9.70553E-005 | -3.34706 |

### *Khanty*

|                               |             |             |          |
|-------------------------------|-------------|-------------|----------|
| Khanty;French,Nganasan        | -0.00309992 | 0.000131899 | -23.5023 |
| Khanty;Italy,Nganasan         | -0.00296911 | 0.000137866 | -21.5362 |
| Khanty;Evenks,French          | -0.00276222 | 0.000136118 | -20.2929 |
| Khanty;Evens_Kamchatka,French | -0.0025904  | 0.000137743 | -18.806  |
| Khanty;Evenks,Italy           | -0.00253134 | 0.000141532 | -17.8853 |
| Khanty;Russians,Nganasan      | -0.00215548 | 0.000123171 | -17.5    |

|                                 |              |             |          |
|---------------------------------|--------------|-------------|----------|
| Khanty;Italy,Evens_Kamchatka    | -0.00230126  | 0.000143217 | -16.0684 |
| Khanty;French,Evens             | -0.00192615  | 0.000124298 | -15.4963 |
| Khanty;Evenks,Russians          | -0.00192413  | 0.000126481 | -15.2127 |
| Khanty;Evens_Kamchatka,Russians | -0.00174022  | 0.000125799 | -13.8333 |
| Khanty;Italy,Evens              | -0.0016569   | 0.000129311 | -12.8133 |
| Khanty;Russians,Evens           | -0.00116568  | 0.000115684 | -10.0764 |
| Khanty;French,Koryaks           | -0.00100941  | 0.000145117 | -6.9558  |
| Khanty;Italy,Koryaks            | -0.000932012 | 0.000149789 | -6.22217 |
| Khanty;French,Chukchi           | -0.000761716 | 0.000131463 | -5.79414 |
| Khanty;Italy,Chukchi            | -0.000636771 | 0.000136046 | -4.68057 |
| Khanty;French,Oroqen            | -0.000612089 | 0.000133443 | -4.5869  |

### Nenets

|                                 |              |              |          |
|---------------------------------|--------------|--------------|----------|
| Nenets;French,Nganasan          | -0.00524027  | 0.000122877  | -42.6463 |
| Nenets;Russians,Nganasan        | -0.00465283  | 0.000111236  | -41.8286 |
| Nenets;Italy,Nganasan           | -0.00512914  | 0.000125712  | -40.8008 |
| Nenets;Evenks,French            | -0.00429488  | 0.00014028   | -30.6164 |
| Nenets;Evenks,Russians          | -0.00381379  | 0.000129984  | -29.3404 |
| Nenets;Aleutian,Nganasan        | -0.00318487  | 0.000111437  | -28.58   |
| Nenets;Evenks,Italy             | -0.00408368  | 0.000145663  | -28.0352 |
| Nenets;Khanty,Nganasan          | -0.00198011  | 8.57176E-005 | -23.1004 |
| Nenets;Evens_Kamchatka,French   | -0.00325128  | 0.000152623  | -21.3027 |
| Nenets;Evens_Kamchatka,Russians | -0.0027581   | 0.000139876  | -19.7182 |
| Nenets;Italy,Evens_Kamchatka    | -0.00298182  | 0.000158093  | -18.8612 |
| Nenets;French,Evens             | -0.00257113  | 0.000136933  | -18.7765 |
| Nenets;Russians,Evens           | -0.00216766  | 0.000126229  | -17.1725 |
| Nenets;Italy,Evens              | -0.00232156  | 0.000142821  | -16.2551 |
| Nenets;Evenks,Aleutian          | -0.00205245  | 0.000131108  | -15.6547 |
| Nenets;San,Nganasan             | -0.00241856  | 0.000157139  | -15.3912 |
| Nenets;Evenks,Khanty            | -0.00137243  | 8.99127E-005 | -15.264  |
| Nenets;Khanty,Evens             | -0.00048475  | 8.75049E-005 | -5.53969 |
| Nenets;Evenks,San               | -0.000961374 | 0.00017473   | -5.50207 |
| Nenets;Evens_Kamchatka,Khanty   | -0.000500646 | 0.00010012   | -5.00045 |
| Nenets;Evens_Kamchatka,Aleutian | -0.000621837 | 0.00014076   | -4.41772 |
| Nenets;Selkup,Nganasan          | -0.000478683 | 0.000111974  | -4.27495 |
| Nenets;French,Oroqen            | -0.000569196 | 0.000157751  | -3.60818 |
| Nenets;Aleutian,Evens           | -0.000447105 | 0.000125848  | -3.55274 |
| Nenets;Russians,Oroqen          | -0.000474564 | 0.000147409  | -3.21936 |
| Nenets;French,Koryaks           | -0.000556638 | 0.000177262  | -3.1402  |

### Altaians

|                                   |             |             |          |
|-----------------------------------|-------------|-------------|----------|
| Altaians;French,Evens             | -0.00500369 | 0.000117878 | -42.4479 |
| Altaians;Evens_Kamchatka,French   | -0.00565037 | 0.000135286 | -41.7661 |
| Altaians;Italy,Evens              | -0.00496285 | 0.000120292 | -41.2567 |
| Altaians;Italy,Evens_Kamchatka    | -0.00558964 | 0.000136665 | -40.9004 |
| Altaians;Evenks,French            | -0.00543329 | 0.000133716 | -40.6331 |
| Altaians;Evenks,Italy             | -0.00543083 | 0.000135753 | -40.0053 |
| Altaians;French,Oroqen            | -0.00486176 | 0.000124785 | -38.9612 |
| Altaians;Italy,Oroqen             | -0.00481033 | 0.000129285 | -37.2071 |
| Altaians;Russians,Evens           | -0.00404102 | 0.000109668 | -36.8476 |
| Altaians;Russians,Japanese        | -0.00399195 | 0.000110044 | -36.276  |
| Altaians;Evens_Kamchatka,Russians | -0.00459799 | 0.000126775 | -36.269  |
| Altaians;French,Hezhen            | -0.00469486 | 0.000129505 | -36.2523 |
| Altaians;Evenks,Russians          | -0.004393   | 0.000122064 | -35.9893 |
| Altaians;Russians,Oroqen          | -0.00420793 | 0.000117228 | -35.8952 |
| Altaians;French,Nganasan          | -0.00480721 | 0.000136257 | -35.2806 |

|                                   |             |              |          |
|-----------------------------------|-------------|--------------|----------|
| Altaians;French,Japanese          | -0.00436066 | 0.000123873  | -35.2025 |
| Altaians;Italy,Nganasan           | -0.00490482 | 0.000140398  | -34.935  |
| Altaians;Hezhen,Russians          | -0.0041688  | 0.000120744  | -34.526  |
| Altaians;Italy,Japanese           | -0.00423946 | 0.000124837  | -33.96   |
| Altaians;Italy,Hezhen             | -0.00451268 | 0.000132921  | -33.9502 |
| Altaians;Russians,Han             | -0.00366486 | 0.000112513  | -32.5728 |
| Altaians;French,Han               | -0.00397968 | 0.000124304  | -32.0157 |
| Altaians;French,Daur              | -0.00427533 | 0.000136268  | -31.3745 |
| Altaians;Russians,Daur            | -0.00384625 | 0.000122998  | -31.271  |
| Altaians;Italy,Han                | -0.00380972 | 0.000124512  | -30.5971 |
| Altaians;Italy,Daur               | -0.0041504  | 0.000139274  | -29.8002 |
| Altaians;Russians,Nganasan        | -0.00366058 | 0.000132179  | -27.6941 |
| Altaians;Mongolians,French        | -0.00339524 | 0.000127479  | -26.6338 |
| Altaians;Mongolians,Russians      | -0.00303897 | 0.000115467  | -26.319  |
| Altaians;Italy,Mongolians         | -0.00329365 | 0.000129296  | -25.4738 |
| Altaians;French,Yakuts            | -0.00273741 | 0.000110574  | -24.7564 |
| Altaians;Xibo,Russians            | -0.00290007 | 0.000118185  | -24.5384 |
| Altaians;Xibo,French              | -0.00319801 | 0.000133248  | -24.0004 |
| Altaians;Italy,Yakuts             | -0.00269055 | 0.00011225   | -23.9693 |
| Altaians;Aleutian,Hezhen          | -0.00262792 | 0.00011488   | -22.8753 |
| Altaians;Aleutian,Oroqen          | -0.00272113 | 0.000119645  | -22.7434 |
| Altaians;Italy,Xibo               | -0.00307438 | 0.00013547   | -22.6942 |
| Altaians;Aleutian,Japanese        | -0.00249161 | 0.000111971  | -22.2524 |
| Altaians;Tu,Russians              | -0.00252214 | 0.000114104  | -22.1038 |
| Altaians;Russians,Yakuts          | -0.00219702 | 0.000100461  | -21.8693 |
| Altaians;Italy,Koryaks            | -0.00348184 | 0.000160449  | -21.7005 |
| Altaians;Tu,French                | -0.00271871 | 0.00012554   | -21.6561 |
| Altaians;Italy,Chukchi            | -0.00302674 | 0.000140569  | -21.532  |
| Altaians;Evenks,Aleutian          | -0.00271266 | 0.000127741  | -21.2355 |
| Altaians;Aleutian,Daur            | -0.00251029 | 0.000118909  | -21.111  |
| Altaians;French,Chukchi           | -0.00292327 | 0.000139393  | -20.9714 |
| Altaians;Aleutian,Evens           | -0.00240146 | 0.00011493   | -20.895  |
| Altaians;French,Koryaks           | -0.00333082 | 0.000161036  | -20.6836 |
| Altaians;Aleutian,Han             | -0.00230578 | 0.000114191  | -20.1922 |
| Altaians;Italy,Tu                 | -0.0025307  | 0.000127991  | -19.7725 |
| Altaians;Evens_Kamchatka,Aleutian | -0.00254272 | 0.000131816  | -19.2899 |
| Altaians;French,Buryats           | -0.00234523 | 0.000123419  | -19.0022 |
| Altaians;Russians,Buryats         | -0.00204242 | 0.000113046  | -18.0671 |
| Altaians;Italy,Buryats            | -0.00225501 | 0.000125699  | -17.9398 |
| Altaians;French,Dolgans           | -0.00216107 | 0.000122458  | -17.6474 |
| Altaians;Italy,Dolgans            | -0.00216399 | 0.000125284  | -17.2727 |
| Altaians;Aleutian,Nganasan        | -0.00227361 | 0.000131721  | -17.2608 |
| Altaians;Evenks,San               | -0.00293266 | 0.000171259  | -17.1241 |
| Altaians;San,Evens                | -0.00252486 | 0.000149584  | -16.8792 |
| Altaians;Evens_Kamchatka,San      | -0.00304855 | 0.000181448  | -16.8012 |
| Altaians;Mongolians,Aleutian      | -0.00189113 | 0.000113439  | -16.6709 |
| Altaians;San,Nganasan             | -0.00281838 | 0.000171099  | -16.4723 |
| Altaians;Khanty,Han               | -0.00142292 | 9.14215E-005 | -15.5644 |
| Altaians;Russians,Koryaks         | -0.00238961 | 0.000153839  | -15.5332 |
| Altaians;Aleutian,Xibo            | -0.00178091 | 0.000119003  | -14.9653 |
| Altaians;Russians,Chukchi         | -0.00193878 | 0.000135384  | -14.3206 |
| Altaians;Italy,Tuvans             | -0.00171226 | 0.000121613  | -14.0796 |
| Altaians;Khanty,Japanese          | -0.00129714 | 9.21853E-005 | -14.0711 |
| Altaians;Tu,Aleutian              | -0.001549   | 0.000110372  | -14.0344 |
| Altaians;Italy,Naukan_Yupik       | -0.00223335 | 0.000160011  | -13.9574 |
| Altaians;Tuvans,French            | -0.00169334 | 0.000121922  | -13.8887 |

|                                |              |              |          |
|--------------------------------|--------------|--------------|----------|
| Altaians;Russians,Dolgans      | -0.00154918  | 0.000113536  | -13.6448 |
| Altaians;Oroqen,San            | -0.0020694   | 0.000152087  | -13.6067 |
| Altaians;Aleutian,Yakuts       | -0.00136869  | 0.000101982  | -13.4208 |
| Altaians;Naukan_Yupik,French   | -0.00210288  | 0.000160579  | -13.0956 |
| Altaians;Tuvans,Russians       | -0.00137812  | 0.000111251  | -12.3874 |
| Altaians;Aleutian,Buryats      | -0.00121766  | 0.00010681   | -11.4002 |
| Altaians;Khanty,Daur           | -0.00101445  | 9.76469E-005 | -10.389  |
| Altaians;Khanty,Hezhen         | -0.000992374 | 9.83124E-005 | -10.0941 |
| Altaians;Selkup,Han            | -0.00105486  | 0.000104842  | -10.0614 |
| Altaians;Tu,Khanty             | -0.000924459 | 9.61424E-005 | -9.61551 |
| Altaians;Hezhen,San            | -0.00151416  | 0.000160884  | -9.4115  |
| Altaians;San,Yakuts            | -0.00119366  | 0.00012856   | -9.28489 |
| Altaians;Koryaks,San           | -0.00174034  | 0.000197413  | -8.81571 |
| Altaians;Daur,San              | -0.00138562  | 0.000159328  | -8.69667 |
| Altaians;Khanty,Xibo           | -0.00081402  | 9.46432E-005 | -8.60093 |
| Altaians;Mongolians,Khanty     | -0.000776418 | 9.07658E-005 | -8.55408 |
| Altaians;Selkup,Japanese       | -0.000900512 | 0.000107266  | -8.39512 |
| Altaians;Aleutian,Tuvans       | -0.000876287 | 0.00010484   | -8.35836 |
| Altaians;Naukan_Yupik,Russians | -0.00118128  | 0.000148577  | -7.95062 |
| Altaians;Chukchi,San           | -0.00136385  | 0.000175433  | -7.77421 |
| Altaians;Aleutian,Dolgans      | -0.00080562  | 0.000109464  | -7.3597  |
| Altaians;Han,Kets              | -0.000993628 | 0.000142809  | -6.95772 |
| Altaians;Nenets,Han            | -0.000655228 | 0.000095421  | -6.86671 |
| Altaians;Tu,Selkup             | -0.000693875 | 0.000108913  | -6.37093 |
| Altaians;Dolgans,San           | -0.000854115 | 0.000139009  | -6.14431 |
| Altaians;Kets,Japanese         | -0.000843004 | 0.000143379  | -5.87955 |
| Altaians;San,Buryats           | -0.000742083 | 0.000133053  | -5.57737 |
| Altaians;Selkup,Daur           | -0.000574954 | 0.000106297  | -5.40895 |
| Altaians;Xibo,Selkup           | -0.000583874 | 0.000110119  | -5.30222 |
| Altaians;Khanty,Oroqen         | -0.000531569 | 0.000100766  | -5.27528 |
| Altaians;Mongolians,San        | -0.000790618 | 0.000156113  | -5.06438 |
| Altaians;Tuvans,San            | -0.000635852 | 0.000131458  | -4.83693 |
| Altaians;Mongolians,Selkup     | -0.000501753 | 0.000104878  | -4.78417 |
| Altaians;San,Japanese          | -0.000734474 | 0.000165585  | -4.43563 |
| Altaians;Hezhen,Selkup         | -0.000479999 | 0.000113389  | -4.23321 |
| Altaians;Tu,Nenets             | -0.000407495 | 0.000101035  | -4.03322 |
| Altaians;Nenets,Japanese       | -0.000388119 | 9.79856E-005 | -3.96098 |
| Altaians;Xibo,Kets             | -0.000570184 | 0.000146337  | -3.89639 |
| Altaians;Naukan_Yupik,San      | -0.000773558 | 0.000203128  | -3.80824 |
| Altaians;Tu,Kets               | -0.000549359 | 0.000147531  | -3.72369 |
| Altaians;Xibo,San              | -0.000514806 | 0.000155595  | -3.30863 |

Russians

|                                 |             |              |          |
|---------------------------------|-------------|--------------|----------|
| Russians;French,Nganasan        | -0.00239342 | 8.98763E-005 | -26.6301 |
| Russians;French,Chukchi         | -0.00223128 | 8.40083E-005 | -26.5602 |
| Russians;French,Evens           | -0.00220945 | 8.47828E-005 | -26.0602 |
| Russians;Evens_Kamchatka,French | -0.00229917 | 9.23615E-005 | -24.8931 |
| Russians;Nenets,French          | -0.00180598 | 7.26092E-005 | -24.8727 |
| Russians;Evenks,French          | -0.00228708 | 9.23236E-005 | -24.7724 |
| Russians;French,Dolgans         | -0.00185867 | 7.57343E-005 | -24.5419 |
| Russians;Naukan_Yupik,French    | -0.00216838 | 8.95659E-005 | -24.2099 |
| Russians;Khanty,French          | -0.00144898 | 6.01923E-005 | -24.0725 |
| Russians;French,Yakuts          | -0.00178718 | 7.59756E-005 | -23.5231 |
| Russians;French,Koryaks         | -0.002188   | 9.34876E-005 | -23.4041 |
| Russians;Italy,Khanty           | -0.00144658 | 6.50019E-005 | -22.2544 |
| Russians;Italy,Nganasan         | -0.00226021 | 0.000101742  | -22.215  |

|                                  |             |              |          |
|----------------------------------|-------------|--------------|----------|
| Russians;Italy,Nenets            | -0.0017839  | 8.05844E-005 | -22.1371 |
| Russians;French,Oroqen           | -0.00190062 | 8.62346E-005 | -22.0401 |
| Russians;Italy,Chukchi           | -0.00210393 | 9.86646E-005 | -21.3241 |
| Russians;Tuvans,French           | -0.00156201 | 7.36328E-005 | -21.2135 |
| Russians;French,Selkup           | -0.00145558 | 6.94871E-005 | -20.9474 |
| Russians;Italy,Evens             | -0.0019378  | 9.42549E-005 | -20.5591 |
| Russians;Italy,Koryaks           | -0.0021082  | 0.000104387  | -20.1959 |
| Russians;French,Daur             | -0.00167587 | 8.30573E-005 | -20.1772 |
| Russians;Evenks,Italy            | -0.00205379 | 0.000101919  | -20.1513 |
| Russians;French,Hezhen           | -0.00177284 | 8.82081E-005 | -20.0984 |
| Russians;French,Buryats          | -0.0015496  | 7.71543E-005 | -20.0845 |
| Russians;Italy,Naukan_Yupik      | -0.00206803 | 0.0001042    | -19.8468 |
| Russians;Italy,Evens_Kamchatka   | -0.00200761 | 0.000101227  | -19.8327 |
| Russians;French,Greenland_Inuits | -0.00143428 | 7.54856E-005 | -19.0007 |
| Russians;Italy,Selkup            | -0.00152998 | 8.07796E-005 | -18.9402 |
| Russians;Italy,Dolgans           | -0.00163077 | 8.68376E-005 | -18.7796 |
| Russians;Mongolians,French       | -0.00160306 | 8.59181E-005 | -18.658  |
| Russians;French,Han              | -0.00156161 | 8.37818E-005 | -18.639  |
| Russians;French,Japanese         | -0.00161549 | 8.67964E-005 | -18.6124 |
| Russians;Xibo,French             | -0.00154472 | 8.50306E-005 | -18.1667 |
| Russians;French,Altaians         | -0.00124678 | 7.03659E-005 | -17.7186 |
| Russians;Tu,French               | -0.00144335 | 8.36223E-005 | -17.2604 |
| Russians;Italy,Yakuts            | -0.0015095  | 8.86679E-005 | -17.0242 |
| Russians;French,Kets             | -0.00156912 | 9.58763E-005 | -16.3661 |
| Russians;Italy,Oroqen            | -0.00161837 | 9.92689E-005 | -16.3029 |
| Russians;Italy,Tuvans            | -0.00135011 | 8.55012E-005 | -15.7905 |
| Russians;Italy,Kets              | -0.00165444 | 0.000109986  | -15.0423 |
| Russians;Italy,Greenland_Inuits  | -0.00130865 | 8.92408E-005 | -14.6643 |
| Russians;Italy,Hezhen            | -0.00135985 | 9.72532E-005 | -13.9826 |
| Russians;Italy,Buryats           | -0.00122856 | 8.92671E-005 | -13.7627 |
| Russians;Italy,Daur              | -0.00132012 | 9.87876E-005 | -13.3632 |
| Russians;Italy,Mongolians        | -0.00127065 | 9.76097E-005 | -13.0176 |
| Russians;Italy,Altaians          | -0.00101597 | 7.95118E-005 | -12.7775 |
| Russians;Italy,Japanese          | -0.00126347 | 0.000100482  | -12.5741 |
| Russians;Italy,Xibo              | -0.00119028 | 9.79618E-005 | -12.1505 |
| Russians;Italy,Han               | -0.00116083 | 9.82607E-005 | -11.8138 |
| Russians;Italy,Tu                | -0.00102453 | 9.58969E-005 | -10.6837 |
| Russians;Aleutian,French         | -0.00024049 | 5.59612E-005 | -4.29744 |
| Russians;Italy,Aleutian          | -0.00024742 | 6.42547E-005 | -3.85061 |

Selkup

|                                 |              |             |          |
|---------------------------------|--------------|-------------|----------|
| Selkup;French,Nganasan          | -0.00376065  | 0.000172447 | -21.8075 |
| Selkup;Italy,Nganasan           | -0.00355303  | 0.000176013 | -20.1861 |
| Selkup;Evenks,French            | -0.00354267  | 0.000180771 | -19.5976 |
| Selkup;Evenks,Italy             | -0.00323498  | 0.000183299 | -17.6487 |
| Selkup;Russians,Nganasan        | -0.00282281  | 0.000162526 | -17.3683 |
| Selkup;Evenks,Russians          | -0.00271117  | 0.000169759 | -15.9707 |
| Selkup;Evens_Kamchatka,French   | -0.00290262  | 0.000182971 | -15.8639 |
| Selkup;Italy,Evens_Kamchatka    | -0.00253667  | 0.000185811 | -13.6519 |
| Selkup;French,Evens             | -0.00216477  | 0.000173614 | -12.4688 |
| Selkup;Evens_Kamchatka,Russians | -0.00205904  | 0.000173744 | -11.851  |
| Selkup;Italy,Evens              | -0.00181871  | 0.000177957 | -10.2199 |
| Selkup;Russians,Evens           | -0.00141089  | 0.000164499 | -8.57689 |
| Selkup;French,Koryaks           | -0.00103138  | 0.000196547 | -5.24748 |
| Selkup;Aleutian,Nganasan        | -0.000845734 | 0.000169505 | -4.98944 |
| Selkup;Italy,Koryaks            | -0.000877175 | 0.000199008 | -4.40774 |

|                                  |              |              |          |
|----------------------------------|--------------|--------------|----------|
| Selkup;French,Chukchi            | -0.000717014 | 0.000177969  | -4.02887 |
| Selkup;French,Oroqen             | -0.000753277 | 0.000188582  | -3.99442 |
| <u>Dolgans</u>                   |              |              |          |
| Dolgans;Evenks,French            | -0.00305008  | 0.000131632  | -23.1713 |
| Dolgans;Evenks,Italy             | -0.00304469  | 0.000133787  | -22.7578 |
| Dolgans;Evenks,Russians          | -0.00262167  | 0.000123828  | -21.172  |
| Dolgans;Italy,Nganasan           | -0.00264946  | 0.000130253  | -20.3408 |
| Dolgans;French,Nganasan          | -0.00255478  | 0.000131376  | -19.4462 |
| Dolgans;Evens_Kamchatka,French   | -0.0024279   | 0.000144206  | -16.8364 |
| Dolgans;Russians,Nganasan        | -0.00202003  | 0.000123287  | -16.3848 |
| Dolgans;French,Evens             | -0.00195231  | 0.000119217  | -16.3761 |
| Dolgans;Italy,Evens_Kamchatka    | -0.00236425  | 0.000145208  | -16.2818 |
| Dolgans;Italy,Evens              | -0.00190854  | 0.000120102  | -15.891  |
| Dolgans;Evens_Kamchatka,Russians | -0.0019874   | 0.000135476  | -14.6697 |
| Dolgans;Russians,Evens           | -0.00160152  | 0.000113194  | -14.1484 |
| Dolgans;Evenks,Aleutian          | -0.0016849   | 0.000125357  | -13.4408 |
| Dolgans;San,Nganasan             | -0.0018729   | 0.000139851  | -13.3921 |
| Dolgans;Evenks,San               | -0.0018564   | 0.000142929  | -12.9883 |
| Dolgans;Aleutian,Nganasan        | -0.00137662  | 0.000121513  | -11.329  |
| Dolgans;Evens_Kamchatka,San      | -0.00113303  | 0.000159648  | -7.09706 |
| Dolgans;Aleutian,Evens           | -0.000705521 | 0.000107883  | -6.5397  |
| Dolgans;San,Evens                | -0.000780428 | 0.000124613  | -6.26281 |
| Dolgans;Evens_Kamchatka,Aleutian | -0.000675698 | 0.000128465  | -5.25977 |
| Dolgans;Tu,Nganasan              | -0.000324232 | 9.42151E-005 | -3.4414  |
| Dolgans;Han,Nganasan             | -0.000282669 | 0.000089836  | -3.1465  |
| <u>Kets</u>                      |              |              |          |
| Kets;French,Nganasan             | -0.00439225  | 0.00035552   | -12.3545 |
| Kets;Italy,Nganasan              | -0.00417373  | 0.000359764  | -11.6013 |
| Kets;Evenks,French               | -0.00382046  | 0.000354984  | -10.7623 |
| Kets;Russians,Nganasan           | -0.00356796  | 0.000350667  | -10.1748 |
| Kets;Evenks,Italy                | -0.00350187  | 0.000361328  | -9.69165 |
| Kets;Evens_Kamchatka,French      | -0.00337529  | 0.000365348  | -9.23855 |
| Kets;Evenks,Russians             | -0.00310251  | 0.000349908  | -8.86666 |
| Kets;Italy,Evens_Kamchatka       | -0.00299842  | 0.000372451  | -8.05052 |
| Kets;French,Evens                | -0.00274594  | 0.000351175  | -7.81929 |
| Kets;Evens_Kamchatka,Russians    | -0.00264524  | 0.000360788  | -7.33184 |
| Kets;Italy,Evens                 | -0.00238897  | 0.000359943  | -6.63708 |
| Kets;Russians,Evens              | -0.00210561  | 0.000347658  | -6.05656 |
| Kets;Aleutian,Nganasan           | -0.00188745  | 0.000353678  | -5.33662 |
| Kets;French,Oroqen               | -0.00134175  | 0.000359999  | -3.72709 |
| Kets;French,Koryaks              | -0.00137474  | 0.000381217  | -3.60618 |
| Kets;French,Chukchi              | -0.00125287  | 0.000354226  | -3.53693 |
| Kets;Evenks,Aleutian             | -0.00112862  | 0.000355409  | -3.17557 |
| Kets;Italy,Koryaks               | -0.00120963  | 0.000384575  | -3.14536 |
| <u>Yakuts</u>                    |              |              |          |
| Yakuts;French,Evens              | -0.00119612  | 0.000100753  | -11.8717 |
| Yakuts;Italy,Evens               | -0.00120214  | 0.000101858  | -11.8022 |
| Yakuts;Evenks,Italy              | -0.00115999  | 0.00012594   | -9.21072 |
| Yakuts;Evenks,French             | -0.0011156   | 0.000125233  | -8.90815 |
| Yakuts;Russians,Evens            | -0.000773846 | 9.56299E-005 | -8.09209 |
| Yakuts;Evens_Kamchatka,French    | -0.000904377 | 0.000132075  | -6.84744 |
| Yakuts;Italy,Evens_Kamchatka     | -0.000890508 | 0.000133602  | -6.66539 |
| Yakuts;Evenks,Russians           | -0.000615702 | 0.000117497  | -5.24016 |

|                                 |              |             |          |
|---------------------------------|--------------|-------------|----------|
| Yakuts;Italy,Nganasan           | -0.000570857 | 0.000130823 | -4.36358 |
| Yakuts;French,Nganasan          | -0.000426387 | 0.000130525 | -3.2667  |
| Yakuts;Evens_Kamchatka,Russians | -0.000392393 | 0.000125418 | -3.12868 |

### *Buryats*

|                                  |              |             |          |
|----------------------------------|--------------|-------------|----------|
| Buryats;Italy,Evens_Kamchatka    | -0.00237122  | 0.000142658 | -16.6217 |
| Buryats;Evens_Kamchatka,French   | -0.00234173  | 0.000142807 | -16.3979 |
| Buryats;Evenks,Italy             | -0.00204779  | 0.0001464   | -13.9876 |
| Buryats;Evenks,French            | -0.00196002  | 0.000145853 | -13.4384 |
| Buryats;Italy,Evens              | -0.00158609  | 0.000132643 | -11.9576 |
| Buryats;French,Evens             | -0.0015367   | 0.000130697 | -11.7577 |
| Buryats;Evens_Kamchatka,Russians | -0.00159217  | 0.000135429 | -11.7565 |
| Buryats;French,Oroqen            | -0.00148975  | 0.000131407 | -11.3369 |
| Buryats;Italy,Oroqen             | -0.00152855  | 0.00013658  | -11.1916 |
| Buryats;French,Hezhen            | -0.00123661  | 0.00013174  | -9.38676 |
| Buryats;Russians,Oroqen          | -0.00113874  | 0.000124719 | -9.13045 |
| Buryats;Evenks,Russians          | -0.00122255  | 0.000136525 | -8.95477 |
| Buryats;Italy,Hezhen             | -0.00114466  | 0.000133976 | -8.54378 |
| Buryats;Hezhen,Russians          | -0.00101337  | 0.000124376 | -8.14763 |
| Buryats;Evens_Kamchatka,San      | -0.00134306  | 0.000165071 | -8.13624 |
| Buryats;Italy,Nganasan           | -0.00121194  | 0.000155517 | -7.79296 |
| Buryats;Russians,Evens           | -0.000876853 | 0.000122761 | -7.14274 |
| Buryats;Evenks,San               | -0.00106255  | 0.000155984 | -6.81189 |
| Buryats;French,Nganasan          | -0.0010241   | 0.000155021 | -6.60624 |
| Buryats;French,Japanese          | -0.000787614 | 0.000122381 | -6.43577 |
| Buryats;Russians,Japanese        | -0.000721728 | 0.000113294 | -6.37039 |
| Buryats;Italy,Japanese           | -0.00075664  | 0.000124798 | -6.06294 |
| Buryats;French,Daur              | -0.000756392 | 0.00013184  | -5.73722 |
| Buryats;Italy,Daur               | -0.000721686 | 0.000134836 | -5.35233 |
| Buryats;Russians,Daur            | -0.00063013  | 0.000121271 | -5.19606 |
| Buryats;San,Evens                | -0.000661026 | 0.000135635 | -4.87355 |
| Buryats;San,Nganasan             | -0.00063843  | 0.00016282  | -3.92108 |
| Buryats;Aleutian,Oroqen          | -0.000476701 | 0.000122018 | -3.9068  |

### *Xibo*

|                          |              |              |          |
|--------------------------|--------------|--------------|----------|
| Xibo;Khanty,Han          | -0.00169896  | 0.000084764  | -20.0434 |
| Xibo;Han,Evens           | -0.00145705  | 7.57716E-005 | -19.2295 |
| Xibo;Han,Dolgans         | -0.00141934  | 7.49014E-005 | -18.9495 |
| Xibo;Nenets,Han          | -0.00158574  | 0.000084269  | -18.8176 |
| Xibo;Han,Yakuts          | -0.00125051  | 6.95594E-005 | -17.9777 |
| Xibo;Evenks,Han          | -0.00155614  | 8.69645E-005 | -17.894  |
| Xibo;Selkup,Han          | -0.00156104  | 8.97214E-005 | -17.3988 |
| Xibo;Russians,Han        | -0.00185484  | 0.000111079  | -16.6984 |
| Xibo;Russians,Japanese   | -0.00193665  | 0.000117743  | -16.4481 |
| Xibo;Han,Nganasan        | -0.00144072  | 8.96567E-005 | -16.0693 |
| Xibo;French,Japanese     | -0.00200741  | 0.000125738  | -15.9651 |
| Xibo;French,Han          | -0.00187172  | 0.000117724  | -15.8993 |
| Xibo;Evens_Kamchatka,Han | -0.00142421  | 8.96329E-005 | -15.8894 |
| Xibo;Italy,Japanese      | -0.00200984  | 0.000127654  | -15.7444 |
| Xibo;Italy,Han           | -0.00182539  | 0.000119291  | -15.3019 |
| Xibo;Chukchi,Han         | -0.00126031  | 8.35679E-005 | -15.0812 |
| Xibo;Aleutian,Han        | -0.00161492  | 0.000107295  | -15.0513 |
| Xibo;Altaians,Han        | -0.00109005  | 7.24658E-005 | -15.0423 |
| Xibo;Tuvans,Han          | -0.00104333  | 6.96101E-005 | -14.9883 |
| Xibo;Khanty,Japanese     | -0.00132789  | 9.36488E-005 | -14.1795 |
| Xibo;Han,Buryats         | -0.000974522 | 0.000069172  | -14.0884 |



|                                |              |              |          |
|--------------------------------|--------------|--------------|----------|
| Xibo;Aleutian,Japanese         | -0.00155547  | 0.000114499  | -13.585  |
| Xibo;Han,Greenland_Inuits      | -0.00120301  | 9.26877E-005 | -12.9791 |
| Xibo;Koryaks,Han               | -0.00124389  | 9.77001E-005 | -12.7317 |
| Xibo;Han,Kets                  | -0.0015135   | 0.000119566  | -12.6582 |
| Xibo;Naukan_Yupik,Han          | -0.00116637  | 9.76308E-005 | -11.9467 |
| Xibo;Nenets,Japanese           | -0.00107334  | 9.25015E-005 | -11.6035 |
| Xibo;Selkup,Japanese           | -0.00116141  | 0.0001002    | -11.5909 |
| Xibo;Altaians,Japanese         | -0.000844768 | 7.82975E-005 | -10.7892 |
| Xibo;Japanese,Yakuts           | -0.000740174 | 7.19493E-005 | -10.2874 |
| Xibo;Dolgans,Japanese          | -0.000832162 | 8.12279E-005 | -10.2448 |
| Xibo;French,Hezhen             | -0.00136267  | 0.000142506  | -9.56221 |
| Xibo;Italy,Hezhen              | -0.00130413  | 0.000144027  | -9.05477 |
| Xibo;Kets,Japanese             | -0.00111759  | 0.000126029  | -8.86768 |
| Xibo;Evenks,Japanese           | -0.000803146 | 0.000091442  | -8.78311 |
| Xibo;Tuvans,Japanese           | -0.00063773  | 7.48392E-005 | -8.52134 |
| Xibo;Japanese,Evens            | -0.000689767 | 8.12279E-005 | -8.49175 |
| Xibo;Hezhen,Russians           | -0.00113456  | 0.000135617  | -8.36591 |
| Xibo;Evenks,Tu                 | -0.000835857 | 0.000102841  | -8.12767 |
| Xibo;Tu,Evens                  | -0.000733929 | 9.25367E-005 | -7.93122 |
| Xibo;Japanese,Buryats          | -0.000569826 | 7.44769E-005 | -7.65104 |
| Xibo;Evens_Kamchatka,Tu        | -0.000803958 | 0.000105211  | -7.64137 |
| Xibo;Nganasan,Japanese         | -0.000730647 | 9.69403E-005 | -7.53709 |
| Xibo;Oroqen,Han                | -0.00058099  | 7.76102E-005 | -7.48601 |
| Xibo;San,Japanese              | -0.00106444  | 0.000143023  | -7.44239 |
| Xibo;Han,San                   | -0.000935571 | 0.000131026  | -7.14035 |
| Xibo;Greenland_Inuits,Japanese | -0.000701189 | 0.000100581  | -6.97141 |
| Xibo;Italy,Oroqen              | -0.00102882  | 0.000155651  | -6.60982 |
| Xibo;French,Oroqen             | -0.000956626 | 0.000154053  | -6.20971 |
| Xibo;Chukchi,Japanese          | -0.000545665 | 9.02186E-005 | -6.04825 |
| Xibo;Tu,Dolgans                | -0.000520526 | 9.00418E-005 | -5.78094 |
| Xibo;Evens_Kamchatka,Japanese  | -0.000553198 | 9.65789E-005 | -5.72793 |
| Xibo;French,Daur               | -0.00084568  | 0.000149525  | -5.65578 |
| Xibo;Italy,Daur                | -0.000844374 | 0.00015191   | -5.55839 |
| Xibo;Tu,Nganasan               | -0.000583468 | 0.000107783  | -5.41335 |
| Xibo;Aleutian,Hezhen           | -0.000712832 | 0.000132338  | -5.38643 |
| Xibo;Hezhen,San                | -0.000865185 | 0.000161298  | -5.3639  |
| Xibo;Russians,Daur             | -0.000714538 | 0.000139046  | -5.13887 |
| Xibo;Oroqen,San                | -0.000847469 | 0.000165517  | -5.12013 |
| Xibo;Tu,Yakuts                 | -0.000416279 | 8.42456E-005 | -4.94125 |
| Xibo;Tu,Oroqen                 | -0.000439918 | 9.03839E-005 | -4.86722 |
| Xibo;Tu,Chukchi                | -0.000500047 | 0.000105848  | -4.72419 |
| Xibo;Naukan_Yupik,Japanese     | -0.00047241  | 0.000103037  | -4.58488 |
| Xibo;Koryaks,Japanese          | -0.000458172 | 0.000103911  | -4.40926 |
| Xibo;Daur,San                  | -0.000639175 | 0.000153804  | -4.15577 |
| Xibo;Russians,Oroqen           | -0.000600736 | 0.000147214  | -4.08069 |
| Xibo;Aleutian,Daur             | -0.00049774  | 0.000130354  | -3.81836 |
| Xibo;Tu,Koryaks                | -0.000456025 | 0.000123324  | -3.69778 |
| Xibo;Han,Daur                  | -0.000248151 | 7.42987E-005 | -3.3399  |
| Xibo;Oroqen,Japanese           | -0.000274193 | 8.24512E-005 | -3.32552 |
| Xibo;Tu,Buryats                | -0.000270001 | 8.15191E-005 | -3.31212 |

### Hezhen

|                            |             |              |          |
|----------------------------|-------------|--------------|----------|
| Hezhen;Evens_Kamchatka,Han | -0.0014781  | 9.81642E-005 | -15.0574 |
| Hezhen;Evenks,Han          | -0.0013163  | 9.48334E-005 | -13.8802 |
| Hezhen;Han,Evens           | -0.00103743 | 8.64267E-005 | -12.0036 |
| Hezhen;Han,Nganasan        | -0.00111614 | 0.000101505  | -10.9959 |

|                                 |              |              |          |
|---------------------------------|--------------|--------------|----------|
| Hezhen;Evens_Kamchatka,Japanese | -0.000812419 | 0.000103958  | -7.81491 |
| Hezhen;Evenks,Japanese          | -0.000768643 | 9.99446E-005 | -7.69069 |
| Hezhen;Evens_Kamchatka,Tu       | -0.000810732 | 0.000113253  | -7.15857 |
| Hezhen;Koryaks,Han              | -0.000648662 | 0.000110339  | -5.87882 |
| Hezhen;Nganasan,Japanese        | -0.000611404 | 0.000106502  | -5.74079 |
| Hezhen;Nenets,Han               | -0.000530905 | 0.000100068  | -5.30543 |
| Hezhen;Japanese,Evens           | -0.000475484 | 9.16484E-005 | -5.18814 |
| Hezhen;Han,Dolgans              | -0.000468022 | 9.16898E-005 | -5.10441 |
| Hezhen;Evenks,Tu                | -0.000548907 | 0.000110126  | -4.98434 |
| Hezhen;Chukchi,Han              | -0.00050388  | 0.00010127   | -4.97563 |

Oroqen

|                                   |              |              |          |
|-----------------------------------|--------------|--------------|----------|
| Oroqen;Han,Nganasan               | -0.00174975  | 9.60477E-005 | -18.2175 |
| Oroqen;Evenks,Han                 | -0.00164901  | 0.000092895  | -17.7514 |
| Oroqen;Evens_Kamchatka,Han        | -0.00147007  | 0.00010276   | -14.3059 |
| Oroqen;Nganasan,Japanese          | -0.00134647  | 9.77793E-005 | -13.7705 |
| Oroqen;Evenks,Japanese            | -0.00120281  | 9.31593E-005 | -12.9113 |
| Oroqen;Han,Evens                  | -0.00102297  | 8.82952E-005 | -11.5858 |
| Oroqen;Evenks,Tu                  | -0.0010698   | 0.000102456  | -10.4416 |
| Oroqen;Tu,Nganasan                | -0.00103357  | 0.000107226  | -9.63915 |
| Oroqen;Evens_Kamchatka,Tu         | -0.000990893 | 0.00010936   | -9.06083 |
| Oroqen;Evens_Kamchatka,Japanese   | -0.000905858 | 0.000103021  | -8.79293 |
| Oroqen;Xibo,Nganasan              | -0.000890019 | 0.000110581  | -8.04856 |
| Oroqen;Daur,Nganasan              | -0.000719853 | 0.000108349  | -6.64384 |
| Oroqen;Evenks,Xibo                | -0.000673859 | 0.000102598  | -6.56795 |
| Oroqen;Japanese,Evens             | -0.000562487 | 8.85823E-005 | -6.34988 |
| Oroqen;Evens_Kamchatka,Xibo       | -0.000626854 | 0.000107648  | -5.82321 |
| Oroqen;Evenks,Daur                | -0.00054652  | 0.000105468  | -5.18187 |
| Oroqen;Tu,Evens                   | -0.000440924 | 9.59997E-005 | -4.59297 |
| Oroqen;Evenks,Mongolians          | -0.000448256 | 0.000101042  | -4.43634 |
| Oroqen;Hezhen,Nganasan            | -0.000473594 | 0.000108859  | -4.35052 |
| Oroqen;Mongolians,Nganasan        | -0.000398827 | 0.000104955  | -3.79998 |
| Oroqen;Evens_Kamchatka,Mongolians | -0.000368281 | 0.000106648  | -3.45323 |
| Oroqen;Han,Dolgans                | -0.000298909 | 8.80698E-005 | -3.394   |

Tu

|                         |              |              |          |
|-------------------------|--------------|--------------|----------|
| Tu;Russians,Han         | -0.00189832  | 0.000102046  | -18.6026 |
| Tu;French,Han           | -0.00201658  | 0.000108586  | -18.5712 |
| Tu;Italy,Han            | -0.00203462  | 0.00011173   | -18.2101 |
| Tu;Khanty,Han           | -0.00125407  | 8.03701E-005 | -15.6037 |
| Tu;Aleutian,Han         | -0.00151238  | 0.000103752  | -14.5769 |
| Tu;Italy,Japanese       | -0.00173125  | 0.00012273   | -14.1061 |
| Tu;French,Japanese      | -0.00166445  | 0.000119785  | -13.8953 |
| Tu;Russians,Japanese    | -0.00149231  | 0.000112197  | -13.3008 |
| Tu;Han,San              | -0.00150348  | 0.000120411  | -12.4863 |
| Tu;Selkup,Han           | -0.00111659  | 8.97997E-005 | -12.4342 |
| Tu;Nenets,Han           | -0.00100333  | 8.46572E-005 | -11.8517 |
| Tu;Han,Kets             | -0.00119987  | 0.000115521  | -10.3866 |
| Tu;Altaians,Han         | -0.000755601 | 7.28338E-005 | -10.3743 |
| Tu;Han,Greenland_Inuits | -0.000840328 | 9.40677E-005 | -8.93322 |
| Tu;Aleutian,Japanese    | -0.000965106 | 0.000114601  | -8.42147 |
| Tu;Han,Dolgans          | -0.000624166 | 0.000074196  | -8.4124  |
| Tu;San,Japanese         | -0.00114453  | 0.000139271  | -8.21795 |
| Tu;Tuvans,Han           | -0.000566121 | 0.000071022  | -7.97106 |
| Tu;Han,Yakuts           | -0.000559589 | 7.26014E-005 | -7.70768 |
| Tu;Han,Nganasan         | -0.000582603 | 9.22247E-005 | -6.31721 |

|                        |              |              |          |
|------------------------|--------------|--------------|----------|
| Tu;Han,Buryats         | -0.000429874 | 6.99872E-005 | -6.14218 |
| Tu;Naukan_Yupik,Han    | -0.000566068 | 0.00010032   | -5.64264 |
| Tu;Han,Evens           | -0.000448471 | 8.01795E-005 | -5.59333 |
| Tu;Chukchi,Han         | -0.000485613 | 8.72877E-005 | -5.56336 |
| Tu;French,Hezhen       | -0.000786863 | 0.000144312  | -5.4525  |
| Tu;Koryaks,Han         | -0.00051322  | 9.62678E-005 | -5.33117 |
| Tu;Italy,Hezhen        | -0.000792693 | 0.000149666  | -5.29641 |
| Tu;Evenks,Han          | -0.000445639 | 8.84945E-005 | -5.03578 |
| Tu;Hezhen,San          | -0.000712432 | 0.000152988  | -4.6568  |
| Tu;Khanty,Japanese     | -0.000395183 | 9.51868E-005 | -4.15165 |
| Tu;Evens_Kamchatka,Han | -0.000345606 | 8.97518E-005 | -3.85069 |
| Tu;Hezhen,Russians     | -0.000457376 | 0.000138296  | -3.30722 |
| Tu;Daur,San            | -0.000492759 | 0.000153318  | -3.21396 |

### Daur

|                               |              |              |          |
|-------------------------------|--------------|--------------|----------|
| Daur;Han,Evens                | -0.00122169  | 8.26582E-005 | -14.7801 |
| Daur;Evens_Kamchatka,Han      | -0.00139477  | 9.72095E-005 | -14.3481 |
| Daur;Evenks,Han               | -0.00133068  | 9.39265E-005 | -14.1672 |
| Daur;Han,Nganasan             | -0.00125808  | 9.57517E-005 | -13.139  |
| Daur;Han,Dolgans              | -0.000833024 | 8.39423E-005 | -9.92378 |
| Daur;Nenets,Han               | -0.000823566 | 9.31407E-005 | -8.84216 |
| Daur;Evenks,Japanese          | -0.000816536 | 9.52008E-005 | -8.57699 |
| Daur;Japanese,Evens           | -0.000693271 | 0.000083837  | -8.26927 |
| Daur;Nganasan,Japanese        | -0.000786865 | 9.91835E-005 | -7.93343 |
| Daur;Evens_Kamchatka,Japanese | -0.000762617 | 9.64379E-005 | -7.90786 |
| Daur;Han,Yakuts               | -0.000610182 | 7.78407E-005 | -7.83886 |
| Daur;Evens_Kamchatka,Tu       | -0.000827216 | 0.000108728  | -7.60813 |
| Daur;Chukchi,Han              | -0.000619889 | 9.45654E-005 | -6.55514 |
| Daur;Evenks,Tu                | -0.000663086 | 0.000105916  | -6.26048 |
| Daur;Koryaks,Han              | -0.000652599 | 0.000108797  | -5.99834 |
| Daur;Tu,Evens                 | -0.000551272 | 9.42695E-005 | -5.84783 |
| Daur;Nenets,Japanese          | -0.000550029 | 9.49755E-005 | -5.79128 |
| Daur;Dolgans,Japanese         | -0.000484704 | 8.63683E-005 | -5.61207 |
| Daur;Han,Kets                 | -0.000753124 | 0.000135168  | -5.57175 |
| Daur;Selkup,Han               | -0.00055447  | 0.00010015   | -5.53641 |
| Daur;Khanty,Han               | -0.000483033 | 9.44892E-005 | -5.11204 |
| Daur;Naukan_Yupik,Han         | -0.000483638 | 0.000108139  | -4.47237 |
| Daur;Kets,Japanese            | -0.000596073 | 0.000135871  | -4.38705 |
| Daur;Japanese,Yakuts          | -0.000338699 | 7.88999E-005 | -4.29276 |
| Daur;Tu,Nganasan              | -0.000453525 | 0.000111575  | -4.06477 |
| Daur;Selkup,Japanese          | -0.000393692 | 0.000104057  | -3.78342 |
| Daur;Han,Buryats              | -0.000288074 | 7.80766E-005 | -3.68963 |
| Daur;Khanty,Japanese          | -0.000350826 | 9.58862E-005 | -3.65878 |
| Daur;Tuvans,Han               | -0.000263942 | 8.27072E-005 | -3.19129 |

### French

|                       |              |              |          |
|-----------------------|--------------|--------------|----------|
| French;Italy,Russians | -0.000222021 | 3.55334E-005 | -6.24824 |
| French;Italy,Selkup   | -0.000296423 | 6.48196E-005 | -4.57305 |
| French;Italy,Aleutian | -0.000228951 | 5.35804E-005 | -4.27303 |
| French;Italy,Khanty   | -0.000219616 | 5.98821E-005 | -3.66747 |
| French;Italy,Kets     | -0.000307332 | 9.20913E-005 | -3.33726 |

### Greenland Inuits

|                                        |              |             |          |
|----------------------------------------|--------------|-------------|----------|
| Greenland_Inuits;Italy,Naukan_Yupik    | -0.00170939  | 0.000192151 | -8.89606 |
| Greenland_Inuits;Naukan_Yupik,French   | -0.00168411  | 0.000193324 | -8.71133 |
| Greenland_Inuits;Naukan_Yupik,Russians | -0.000950008 | 0.00018426  | -5.15579 |

Chukchi

|                                  |              |             |          |
|----------------------------------|--------------|-------------|----------|
| Chukchi;Naukan_Yupik,Koryaks     | -0.0009769   | 0.000118556 | -8.24002 |
| Chukchi;Koryaks,Greenland_Inuits | -0.000975519 | 0.000132622 | -7.35561 |



|                           | A/B,C   | B/C,A   | A/C,B   |         |          |         |         |         |        |        |         |        |  |
|---------------------------|---------|---------|---------|---------|----------|---------|---------|---------|--------|--------|---------|--------|--|
| <u>Samoyedic speakers</u> |         |         |         |         |          |         |         |         |        |        |         |        |  |
| Selkup and Nenets_Yamal   | -0.0065 | -0.1461 | -0.1526 |         |          |         |         |         |        |        |         |        |  |
|                           |         |         |         |         |          |         |         |         |        |        |         |        |  |
|                           | A/B,C   | B/C,A   | A/C,B   | A/B,D   | B/D,A    | A/D,B   | A/D,C   | D/C,A   | A/C,D  | B/C,D  | D/C,B   | D/B,C  |  |
| <u>South Siberia</u>      |         |         |         |         |          |         |         |         |        |        |         |        |  |
| Buryats                   | 0.0008  | 0.0019  | 0.0027  |         |          |         |         |         |        |        |         |        |  |
| Tuvans                    | 0.0009  | 0.006   | 0.007   | 0.0026  | -0.00221 | 0.0004  | 0.008   | 0.0082  | 0.0162 | 0.0136 | -0.0065 | 0.0071 |  |
| Altaians                  | 0.0042  | -0.007  | -0.0027 | -0.0161 | 0.0037   | -0.0125 | -0.0131 | -0.0106 | 0.0025 | 0.0186 | -0.0098 | 0.0088 |  |

\* Eastern Evens are pooled because of small sample sizes

To work out the order of admixture events in populations with more than three sources of ancestry, we consider each trio of ancestries separately. For example, for the Altaians we first try to resolve the ordering of A,B and C ancestries. However the results of the three covariance tests for all possible configurations of A,B and C are inconclusive, hence this ordering cannot be resolved. The next trio we consider is A,B and D. Here, the smallest covariance is observed between the ratio of B/D and A, we can therefore conclude that A is the most recent of these three ancestries. The next trio is A,D and C. For this trio the smallest absolute value of covariance is observed between A/C and D, hence A ancestry must have mixed with C ancestry before mixing with D ancestry. The covariance tests for the last trio B,C and D are again inconclusive, yet the only possible configuration for the entire admixture graph given these results is (BD)(AC).

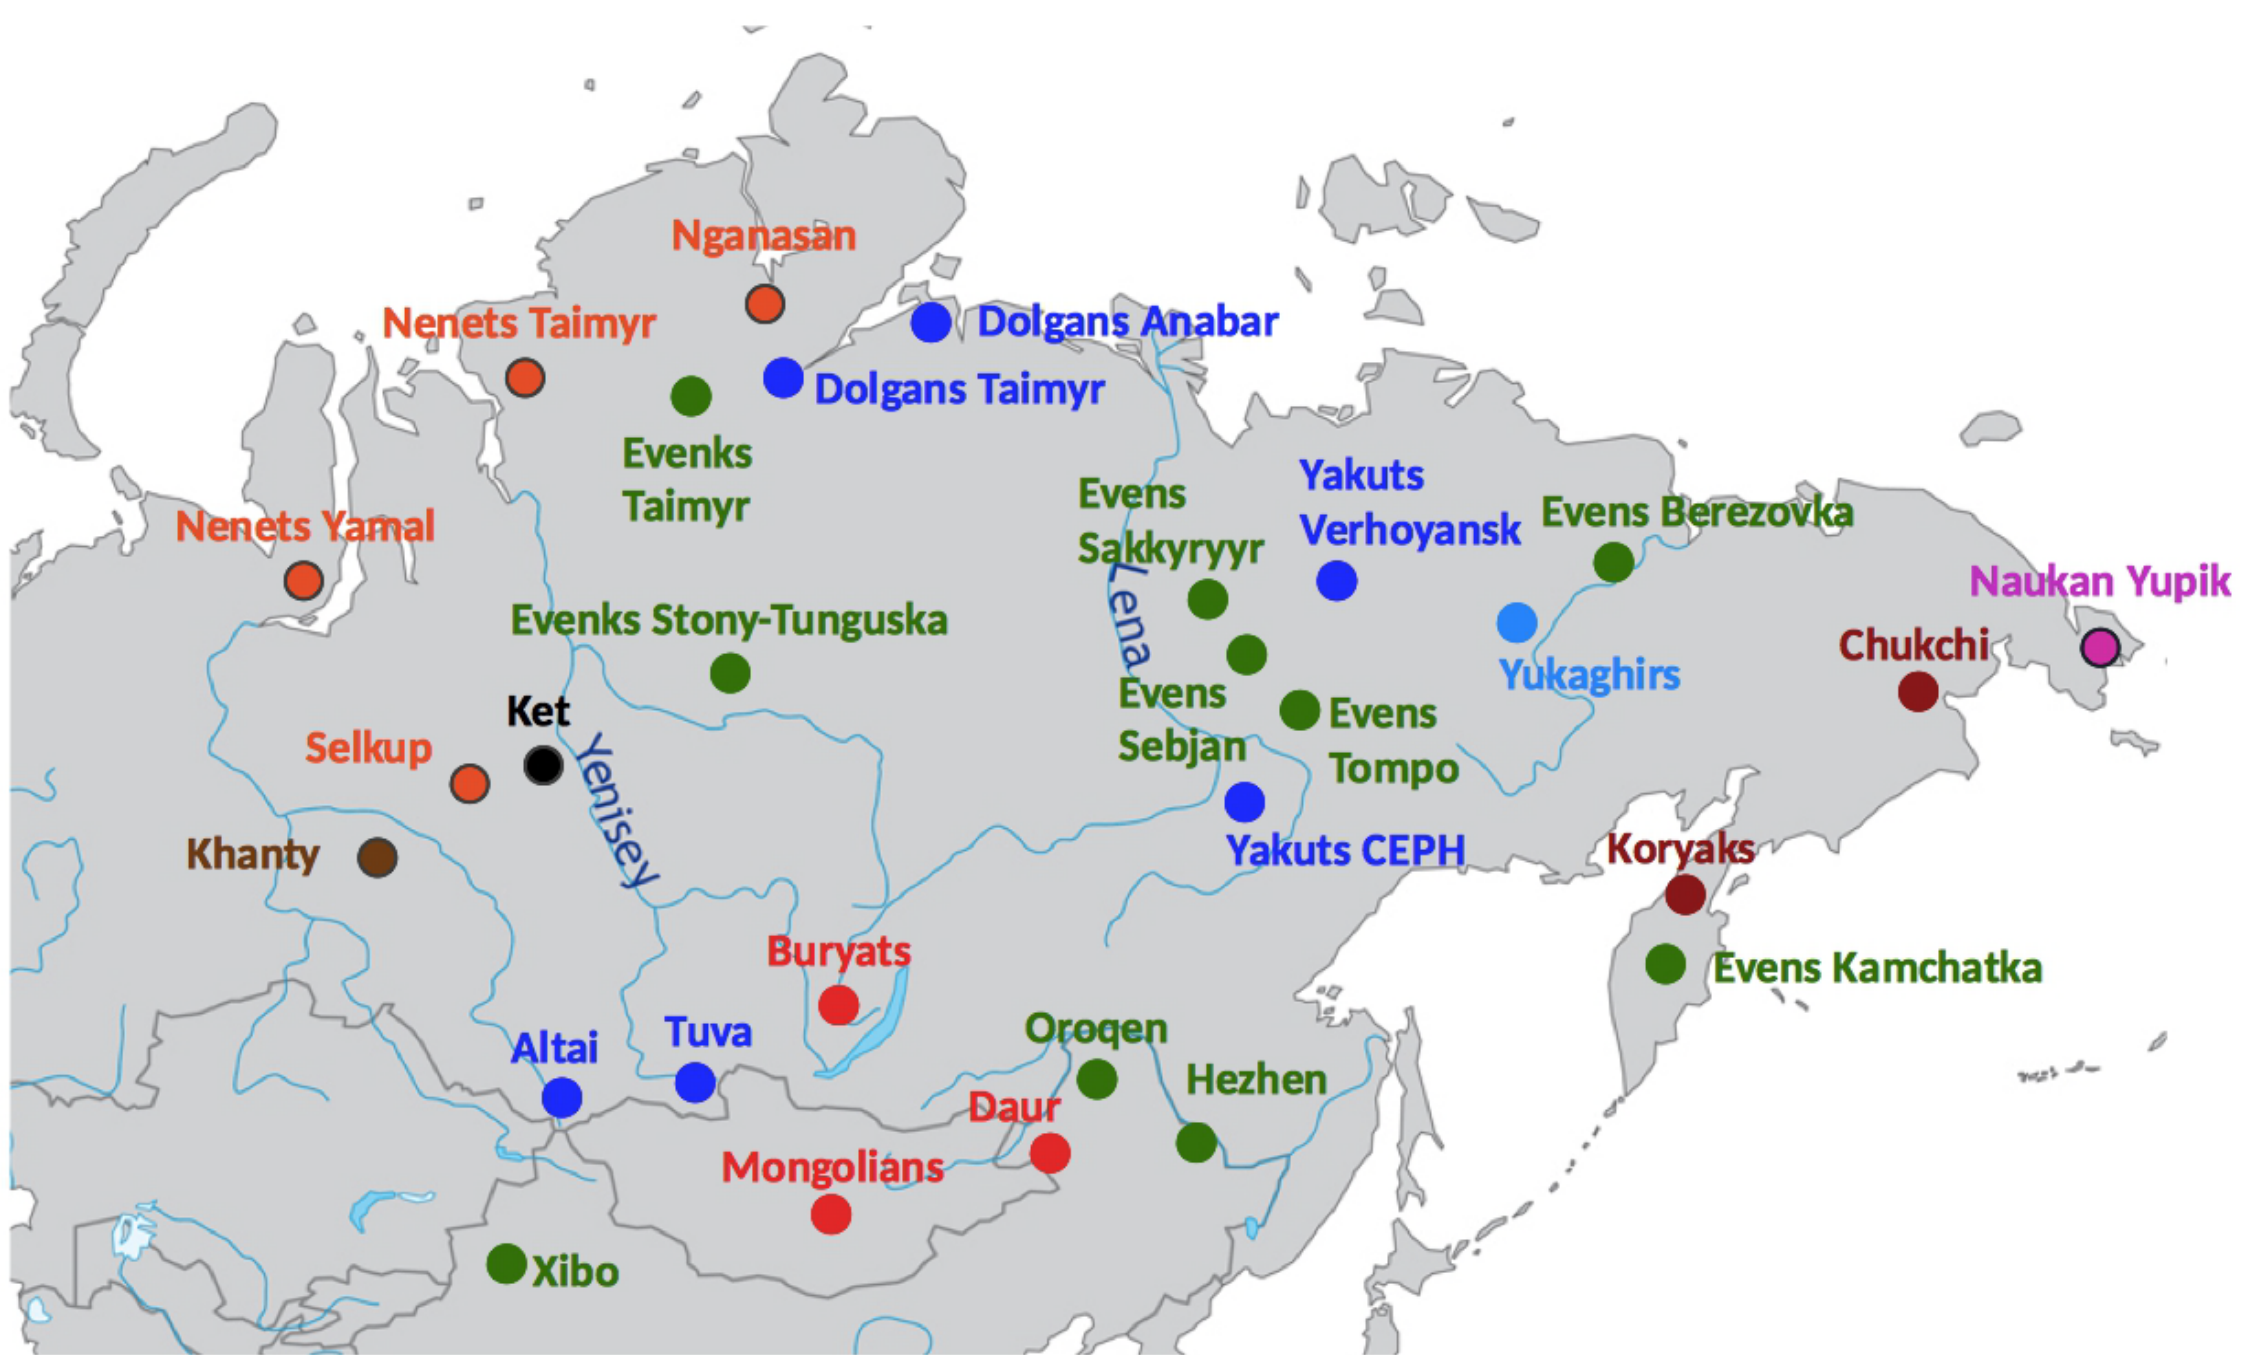

FIGURE S1. Sampling locations for the Siberian populations included in the analyses. The names of the populations are coloured according to their linguistic affiliation as follows: red = Mongolic, blue = Turkic, green = Tungusic, brown = Ugric, orange = Samoyedic, black = Yenisseic, azure = Yukaghirs, maroon = Chukotko-Kamchatkan, pink = Aleut-Yupik-Inuit.

A

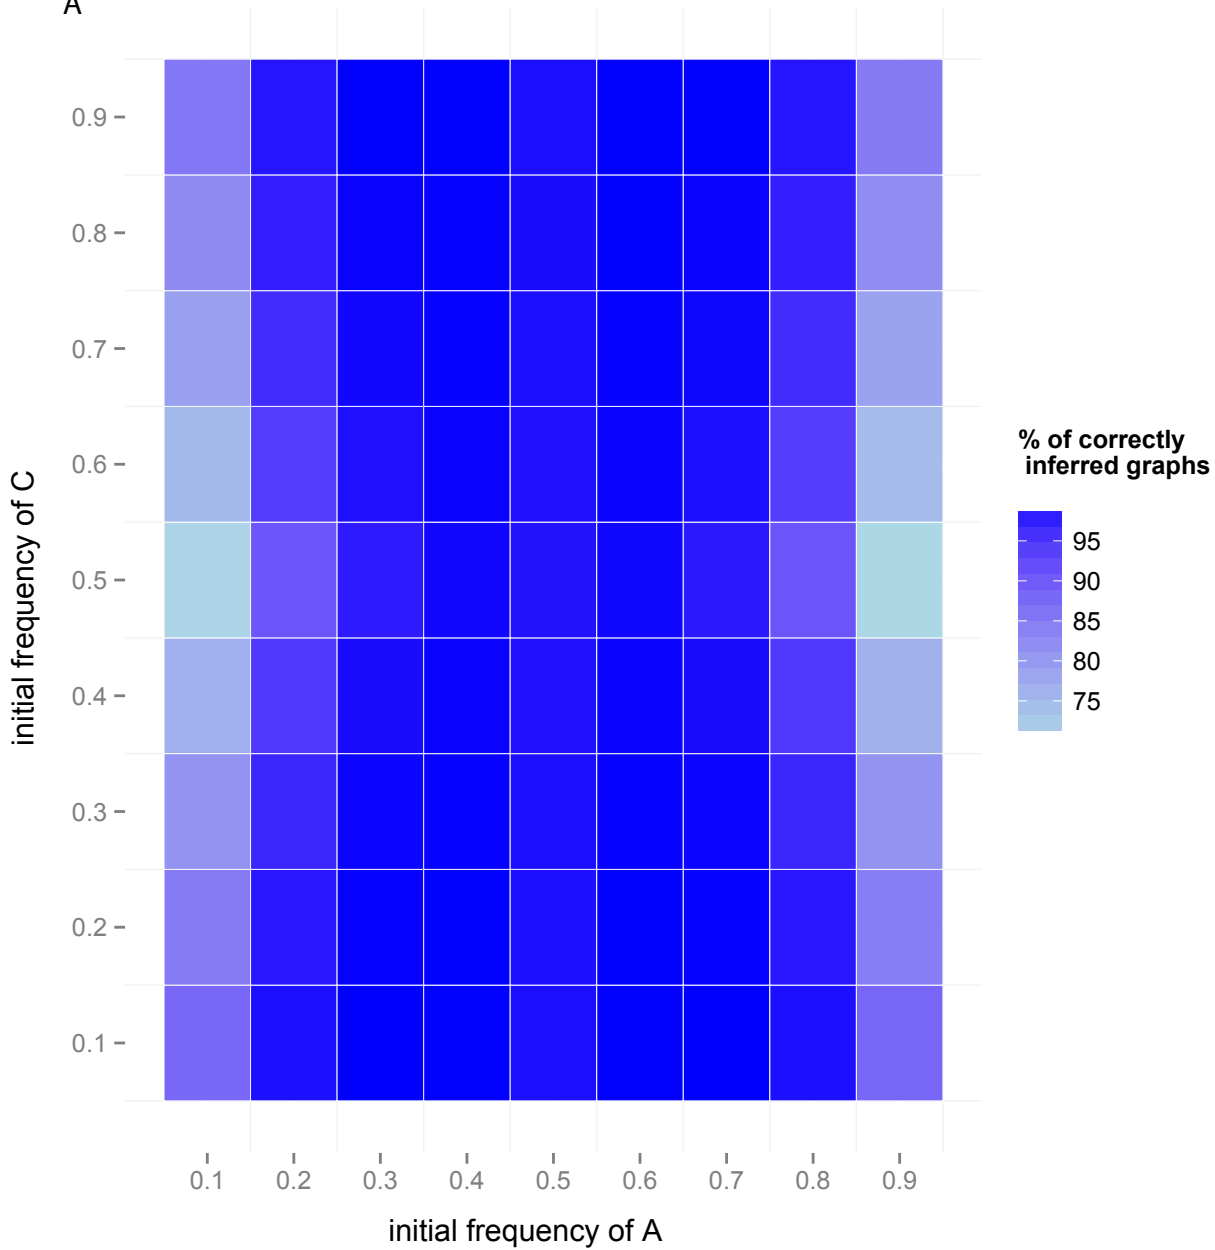





C

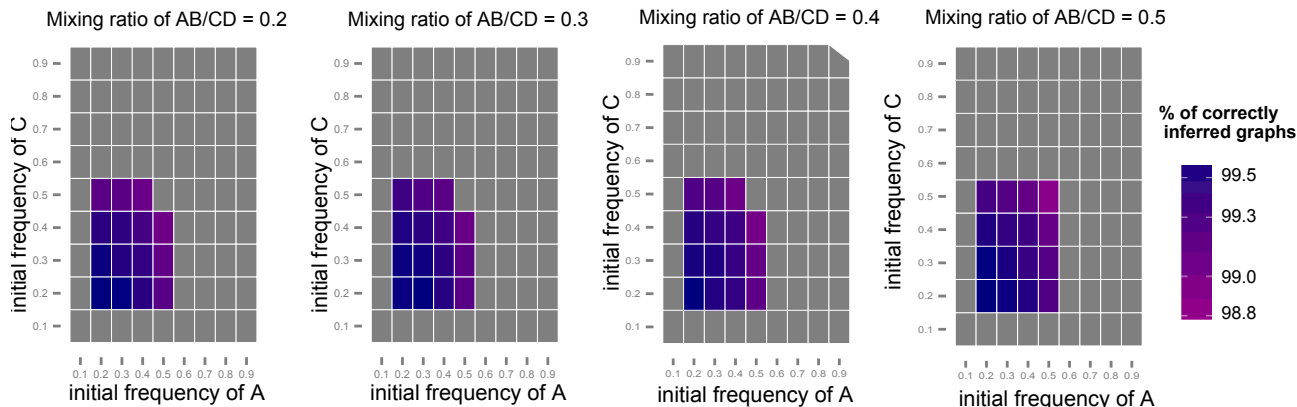

FIGURE S2. Results of simulations to validate the Admixture History Graph method. (A) The simulated history is  $((AB)C)$ , where ancestries A and B were already present in a population at the time of admixture with C. Each rectangle summarizes the results for 100,000 simulations performed for a given set of A and C values, and the colour intensity reflects the number of simulations in which the tree was inferred correctly. The lowest value of 70% correctly inferred graphs is observed when the final frequency of A (or B) is below 10%, and the frequency of C is around 50%. (B) The simulated history is  $((AB)C)D$ , where an already admixed population with two ancestry components A and B first admixes with C, which is then followed by another admixture event with D. Based on the simulation results of  $((AB)C)$  admixture histories (previous panel), the scenarios where the final frequency of A (or B) dropped to below 10% were excluded. In each panel, each rectangle summarizes the results for 100,000 simulations performed for a given set of C and D values, with the value of A given in the panel's title. The color intensity reflects the number of simulations in which the tree was inferred correctly. Grey rectangles denote impossible combinations of A, C and D. For example, if the initial frequency of A is 0.2, that of C 0.5, and that of D 0.2, then addition of C would reduce the frequency of A to 0.1, while subsequent influx of ancestry D would bring its final frequency to 0.08 (see formulae given in Figure 2), which is too low given the criteria we set for these simulations. (C) The simulated history is  $((AB)(CD))$ , where admixture occurs between two already admixed population. In each panel, each rectangle summarizes the results for 100,000 simulations performed for a given set of A and C values, with the value given in the panel's title denoting the mixing ratio between the AB and CD populations. The color intensity reflects the number of simulations in which the tree was inferred correctly, and grey rectangles denote impossible combinations of A, C and D.

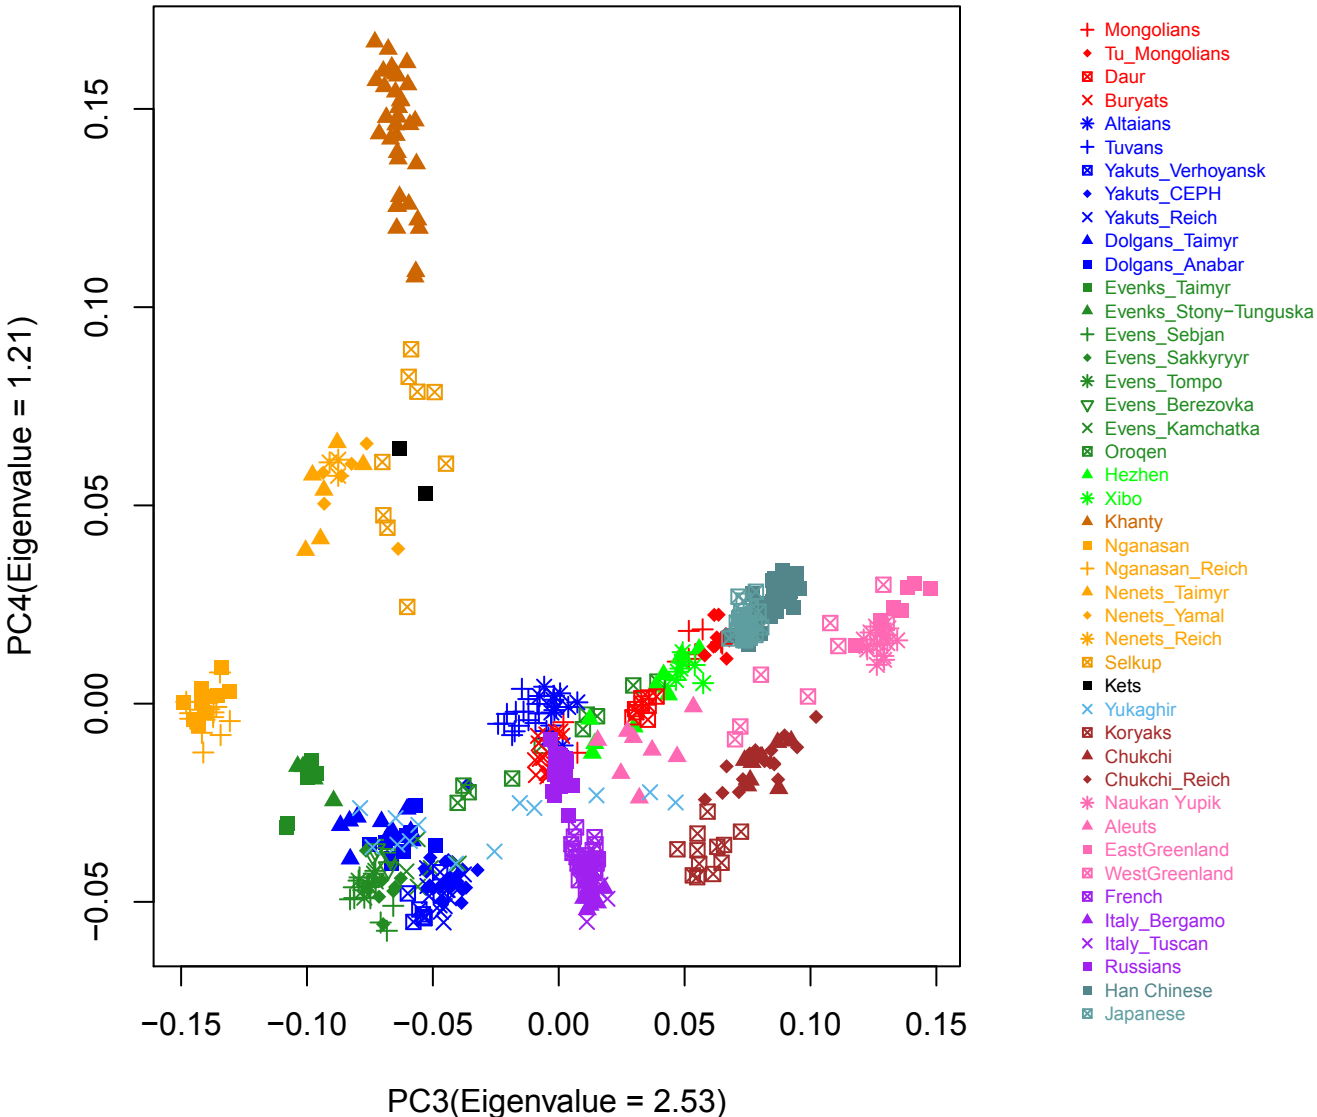

FIGURE S3. Results of the PC analysis: PC3 vs PC4. Each coloured label represents an individual, and individuals are coloured according to their linguistic affiliation, see legend to Figure 1 of the main text for details.

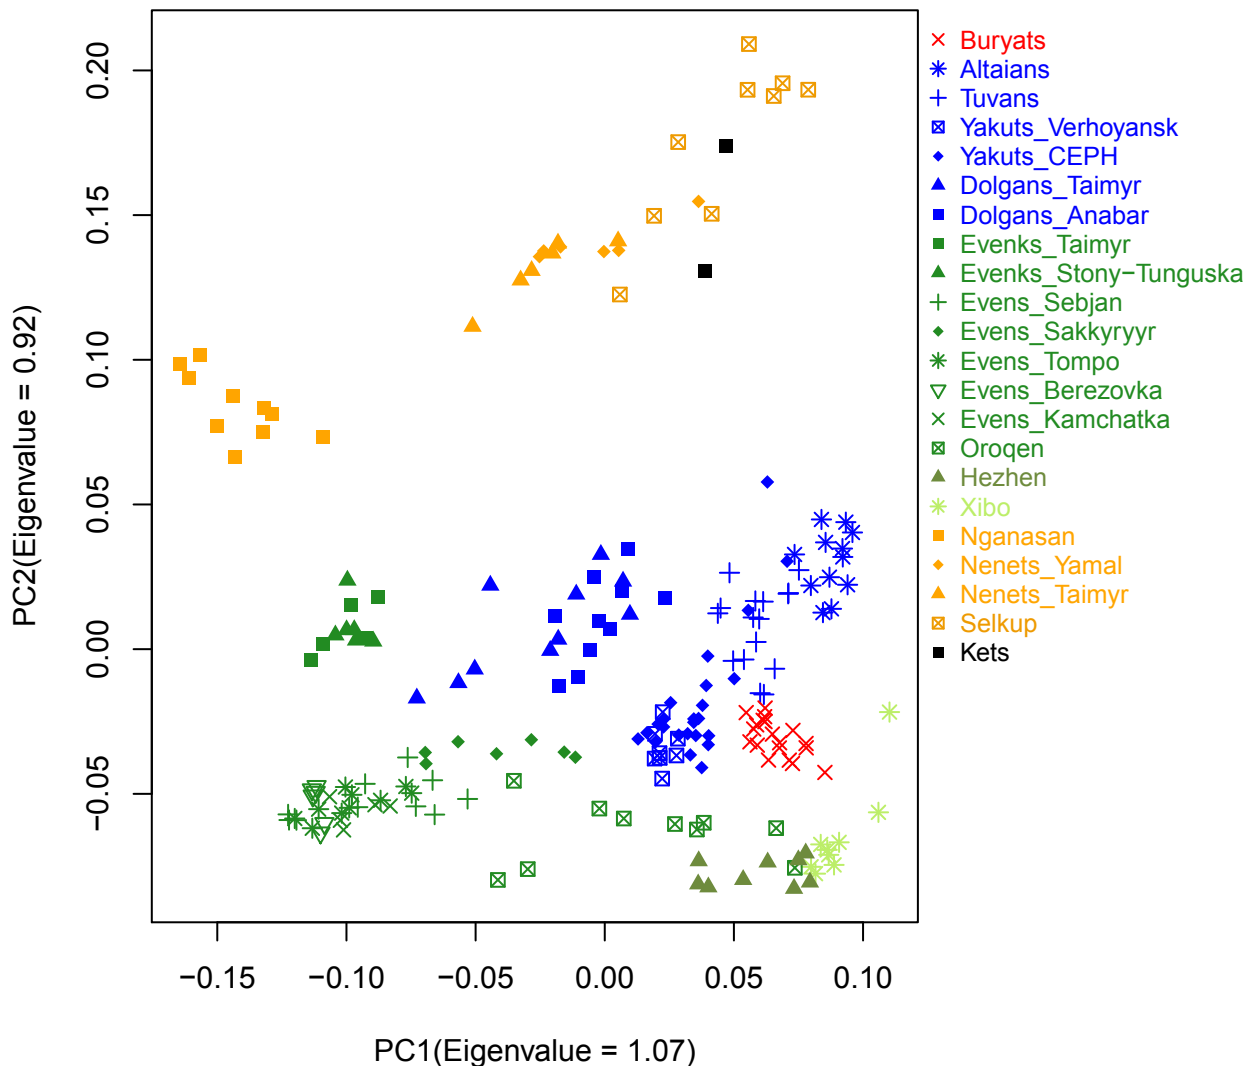

FIGURE S4. Results of the PC analysis for a subset of the dataset. To better understand the relationships between closely related Siberian populations, the PC analysis was performed excluding those populations driving the main axes of variation in the PCA for the entire dataset (all non-Siberian populations as well as the populations of Chukotka and Kamchatka, Khanty and Kets). The heavily admixed Yukaghirs were also excluded from this analysis.

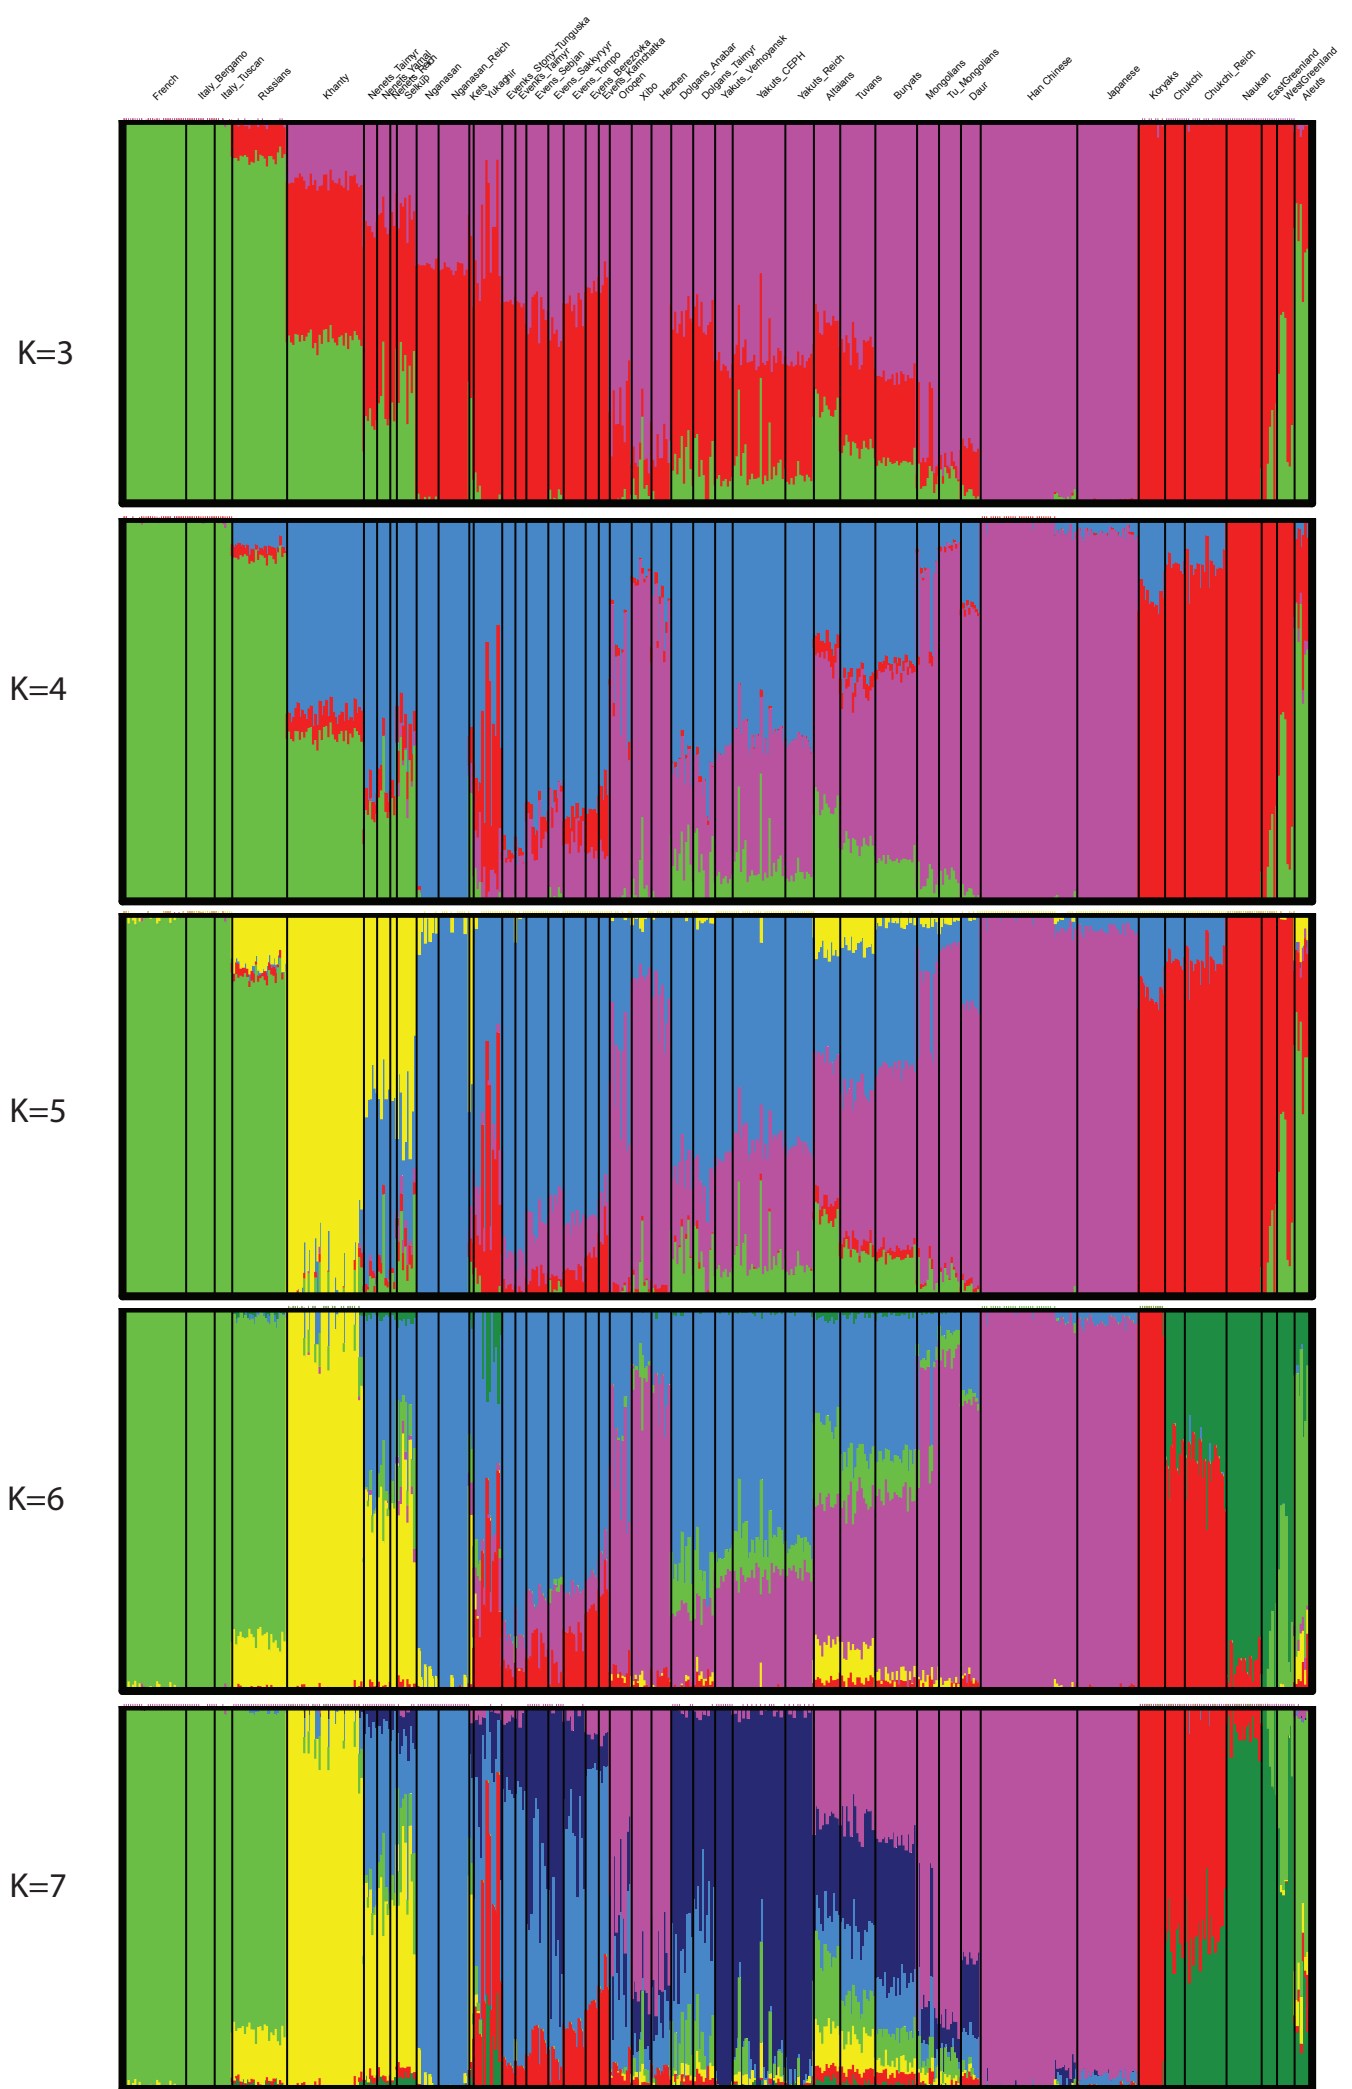

FIGURE S5. Results of the ADMIXTURE analysis for  $K = 3$  through  $K = 7$ .

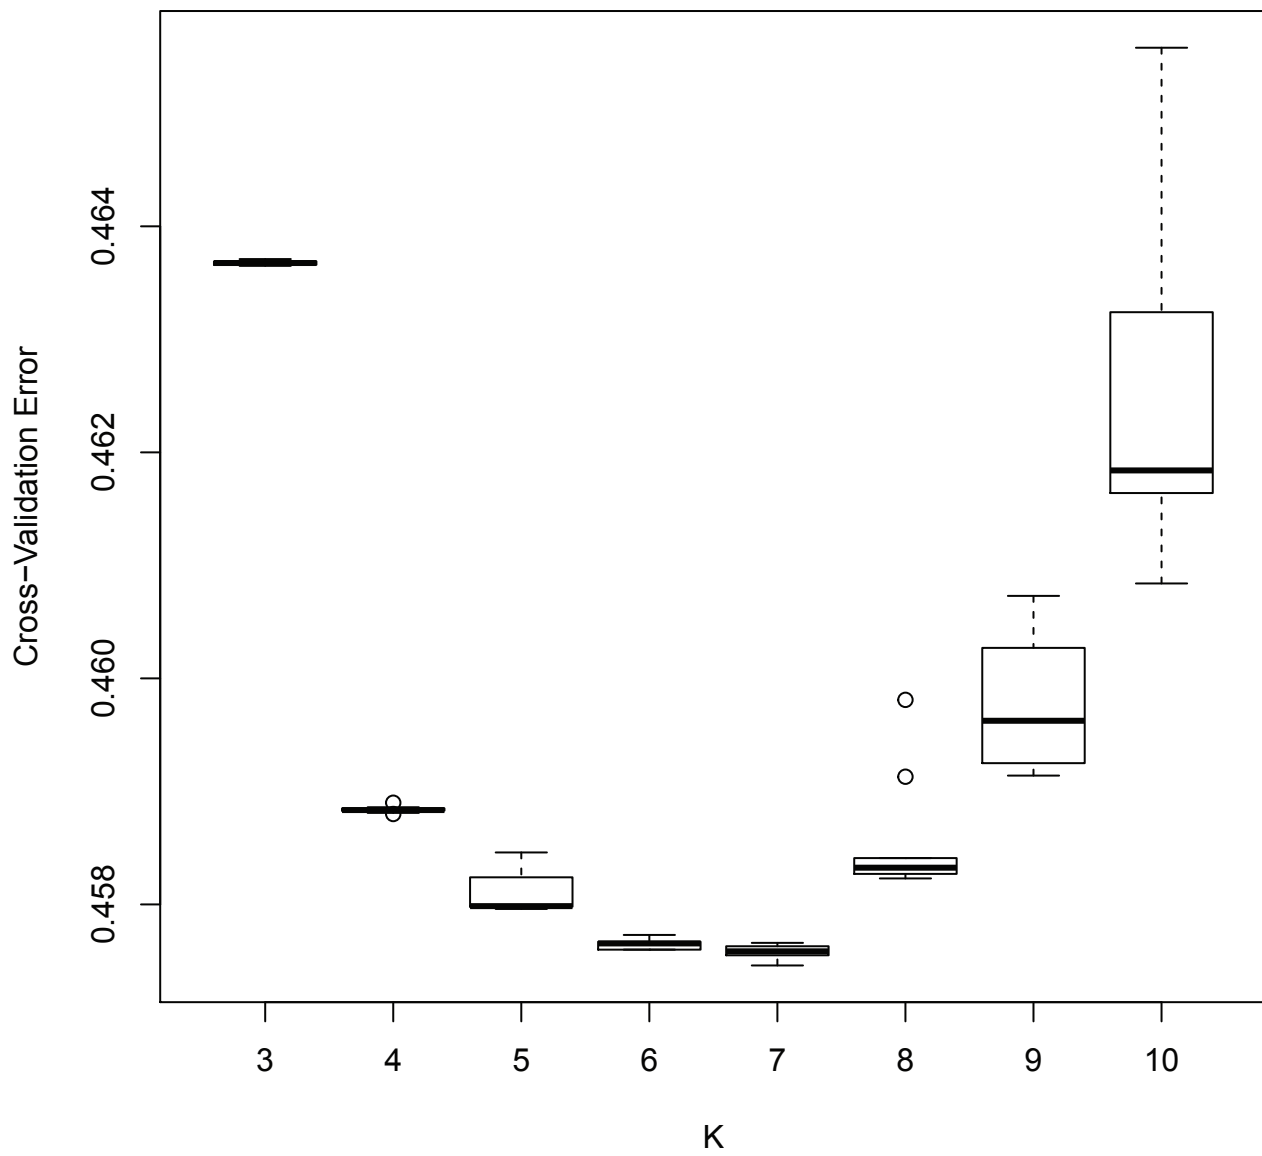

FIGURE S6. Estimated cross-validation error for the ADMIXTURE runs for K=3 through K=10.

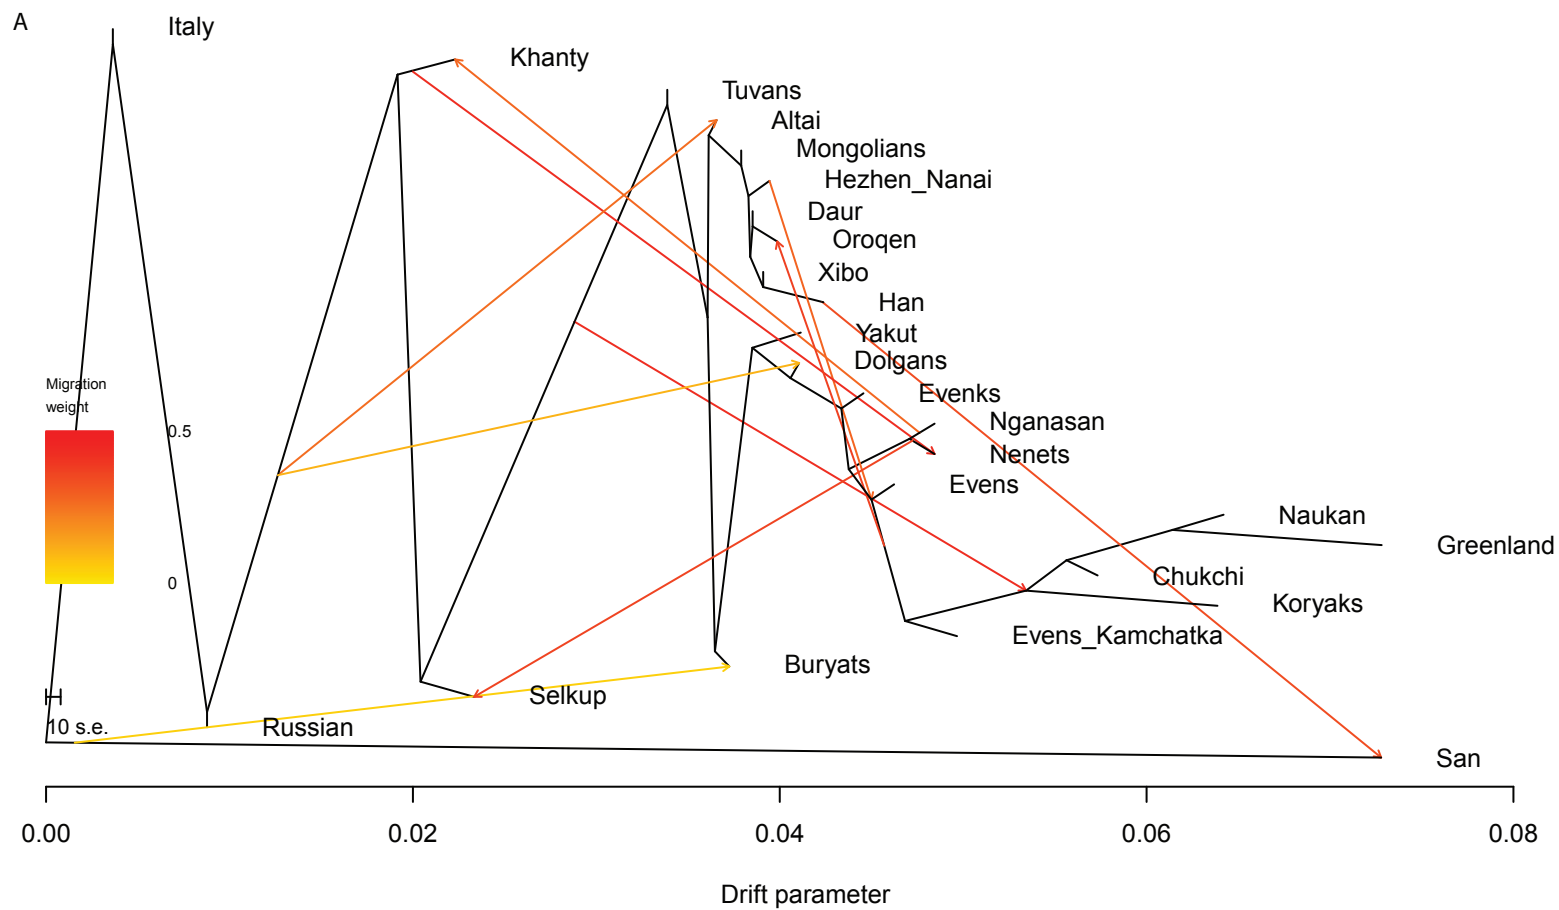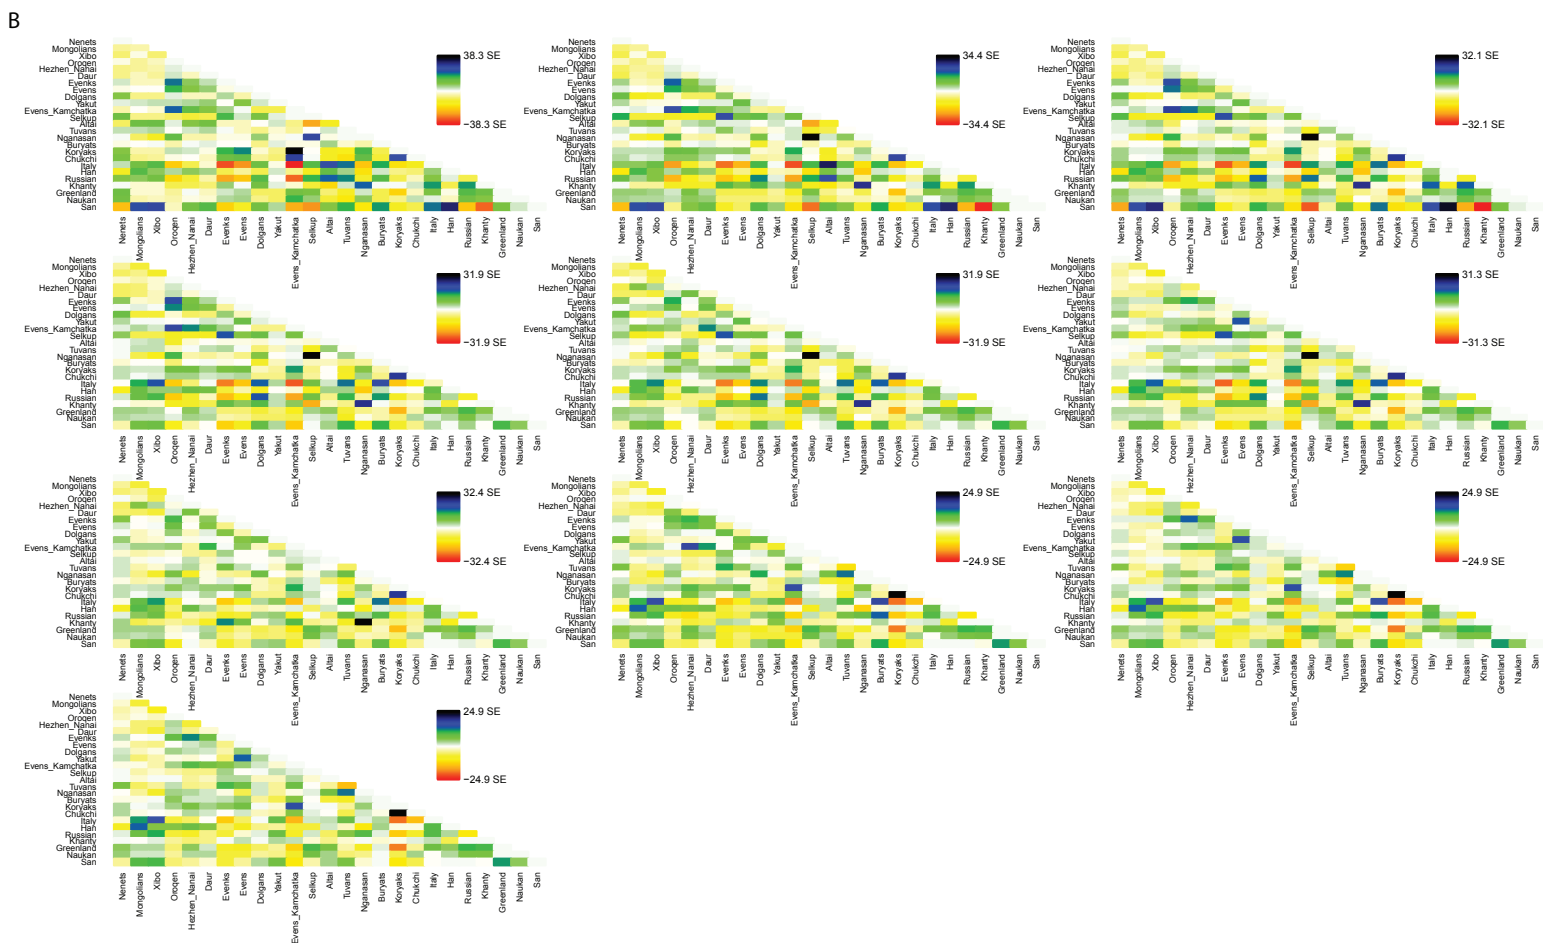

FIGURE S7. TreeMix analysis (A) TreeMix inferred maximum-likelihood tree with ten migration edges. (B) Residual fit from maximum likelihood trees with 1 to 10 migration edges. Positive residuals indicate pairs of populations where the model underestimates the observed covariance, and thus a migration edge between these populations might improve the fit. Negative residuals indicate pairs of populations where the observed covariance is overestimated, suggesting that these populations are being forced too close together due to unmodeled migration somewhere in the tree.

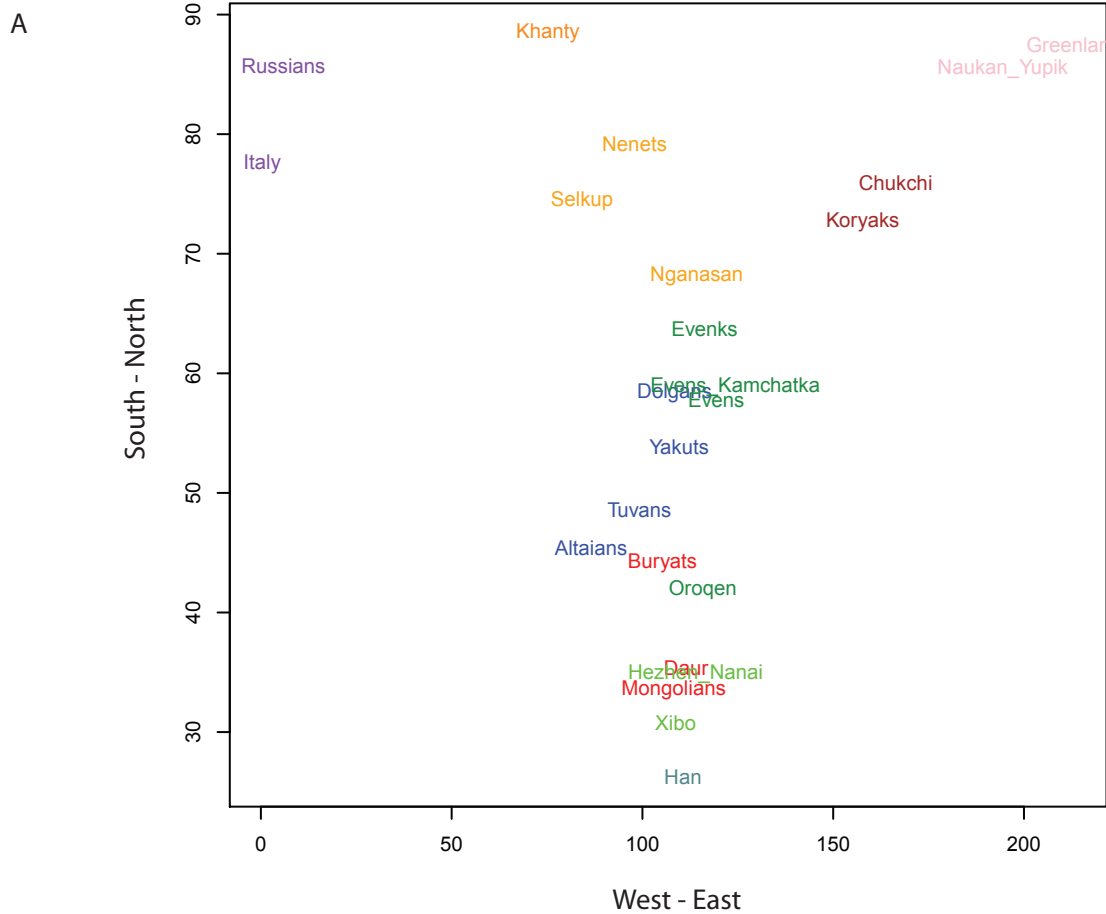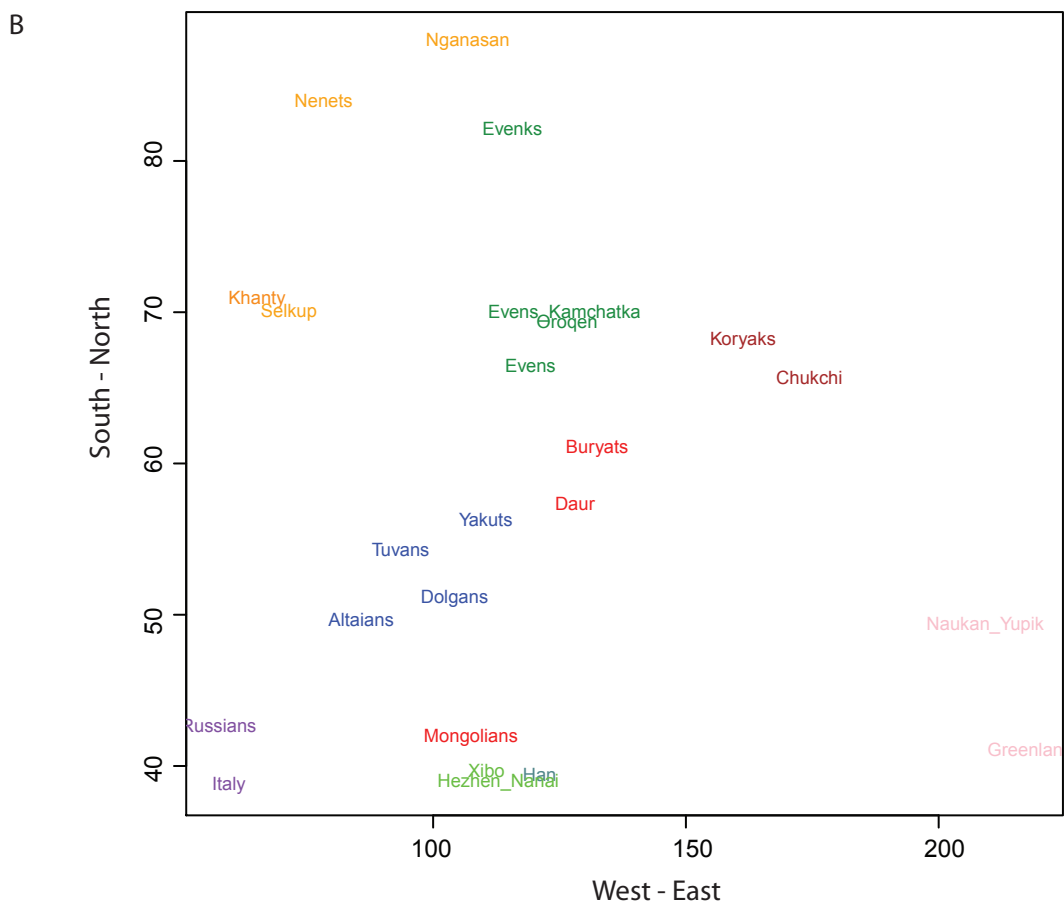

FIGURE S8. SpaceMix analysis (A) A geogenetic map inferred with SpaceMix under a model "Target", which allows populations to find their own location (i.e. migrate), but does not allow admixture. (B) A geogenetic map inferred with SpaceMix under a model "Source and Target", which allows populations to find their own location and to draw admixture (i.e. a model which allows both migration and admixture).



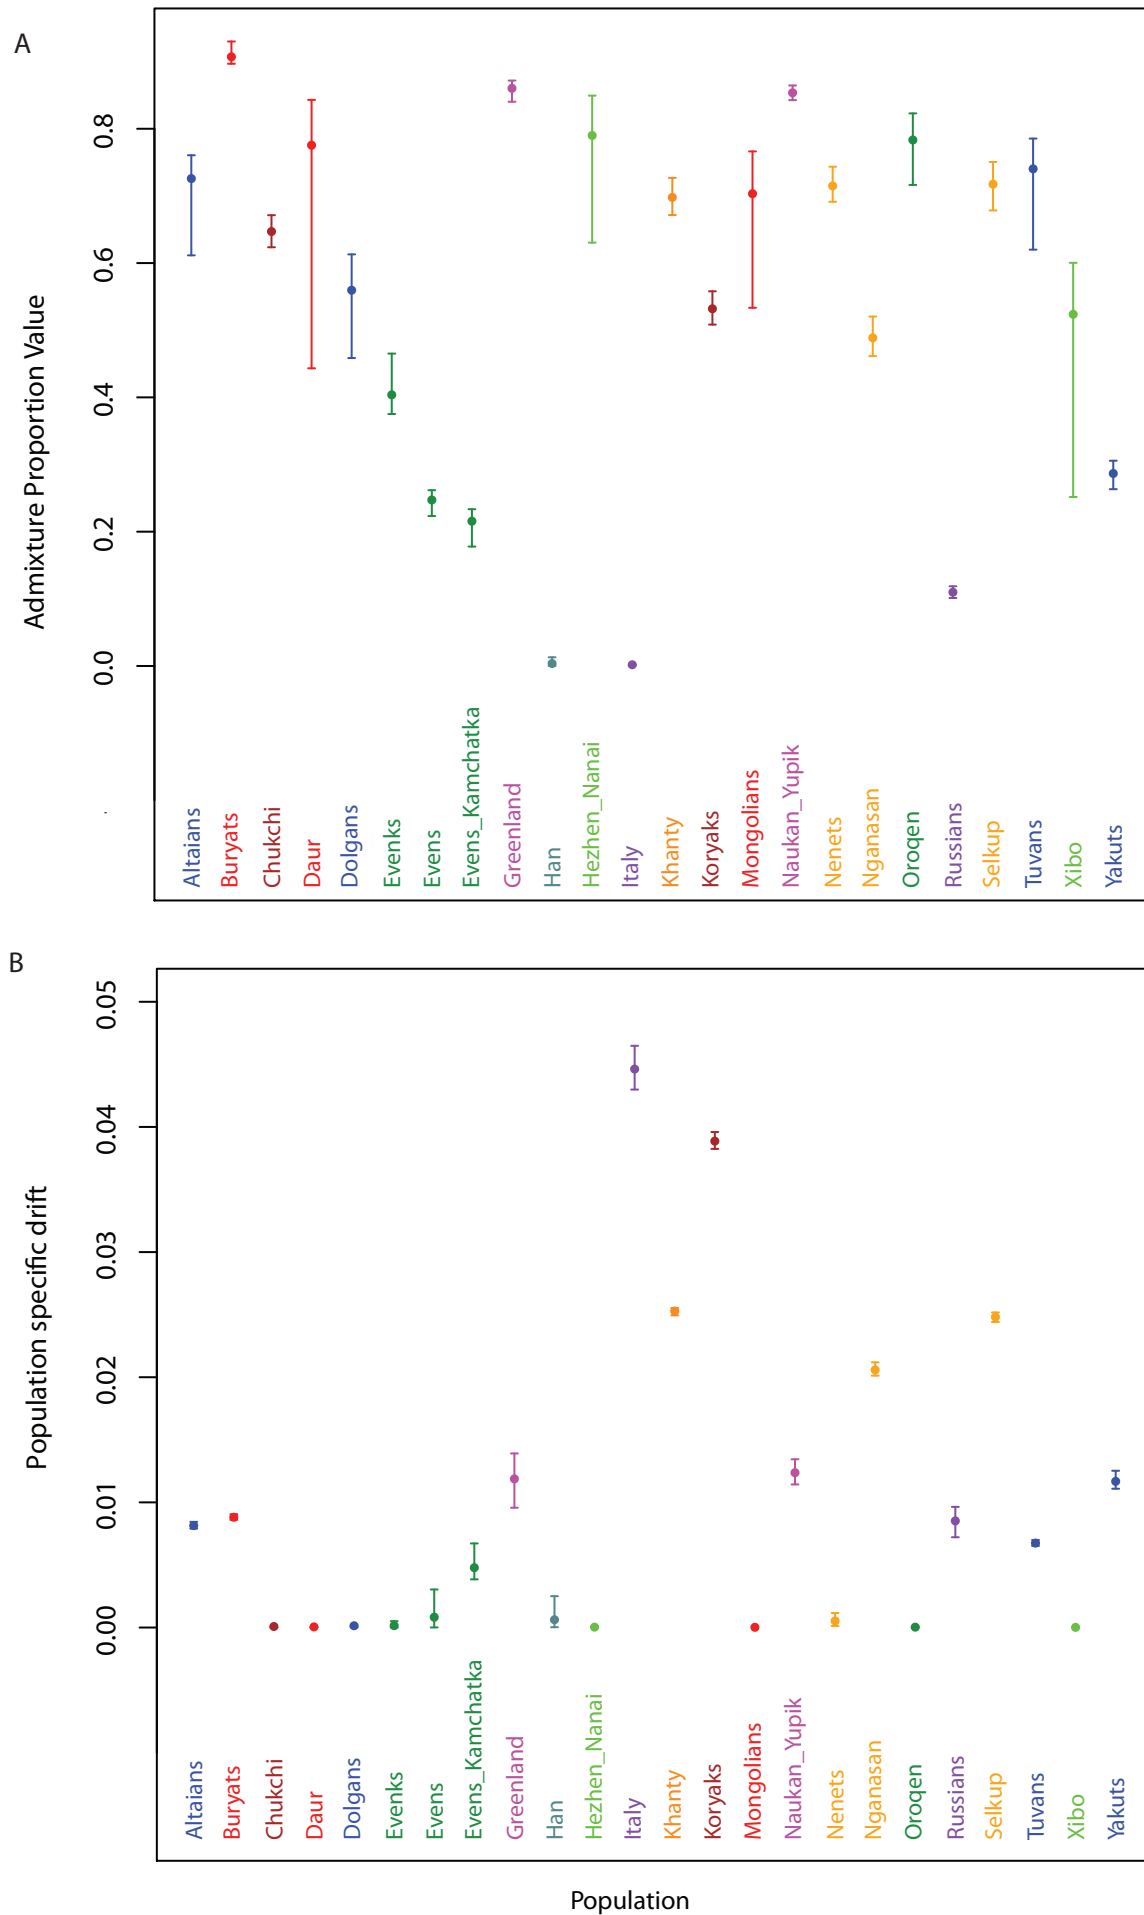

FIGURE S9. Admixture and drift estimates from SpaceMix (A) Mean admixture proportions (and 95% CIs) for each population inferred by SpaceMix. (B) Population specific drift parameter (and 95% CIs) inferred by SpaceMix.

# IBD blocks shared within population

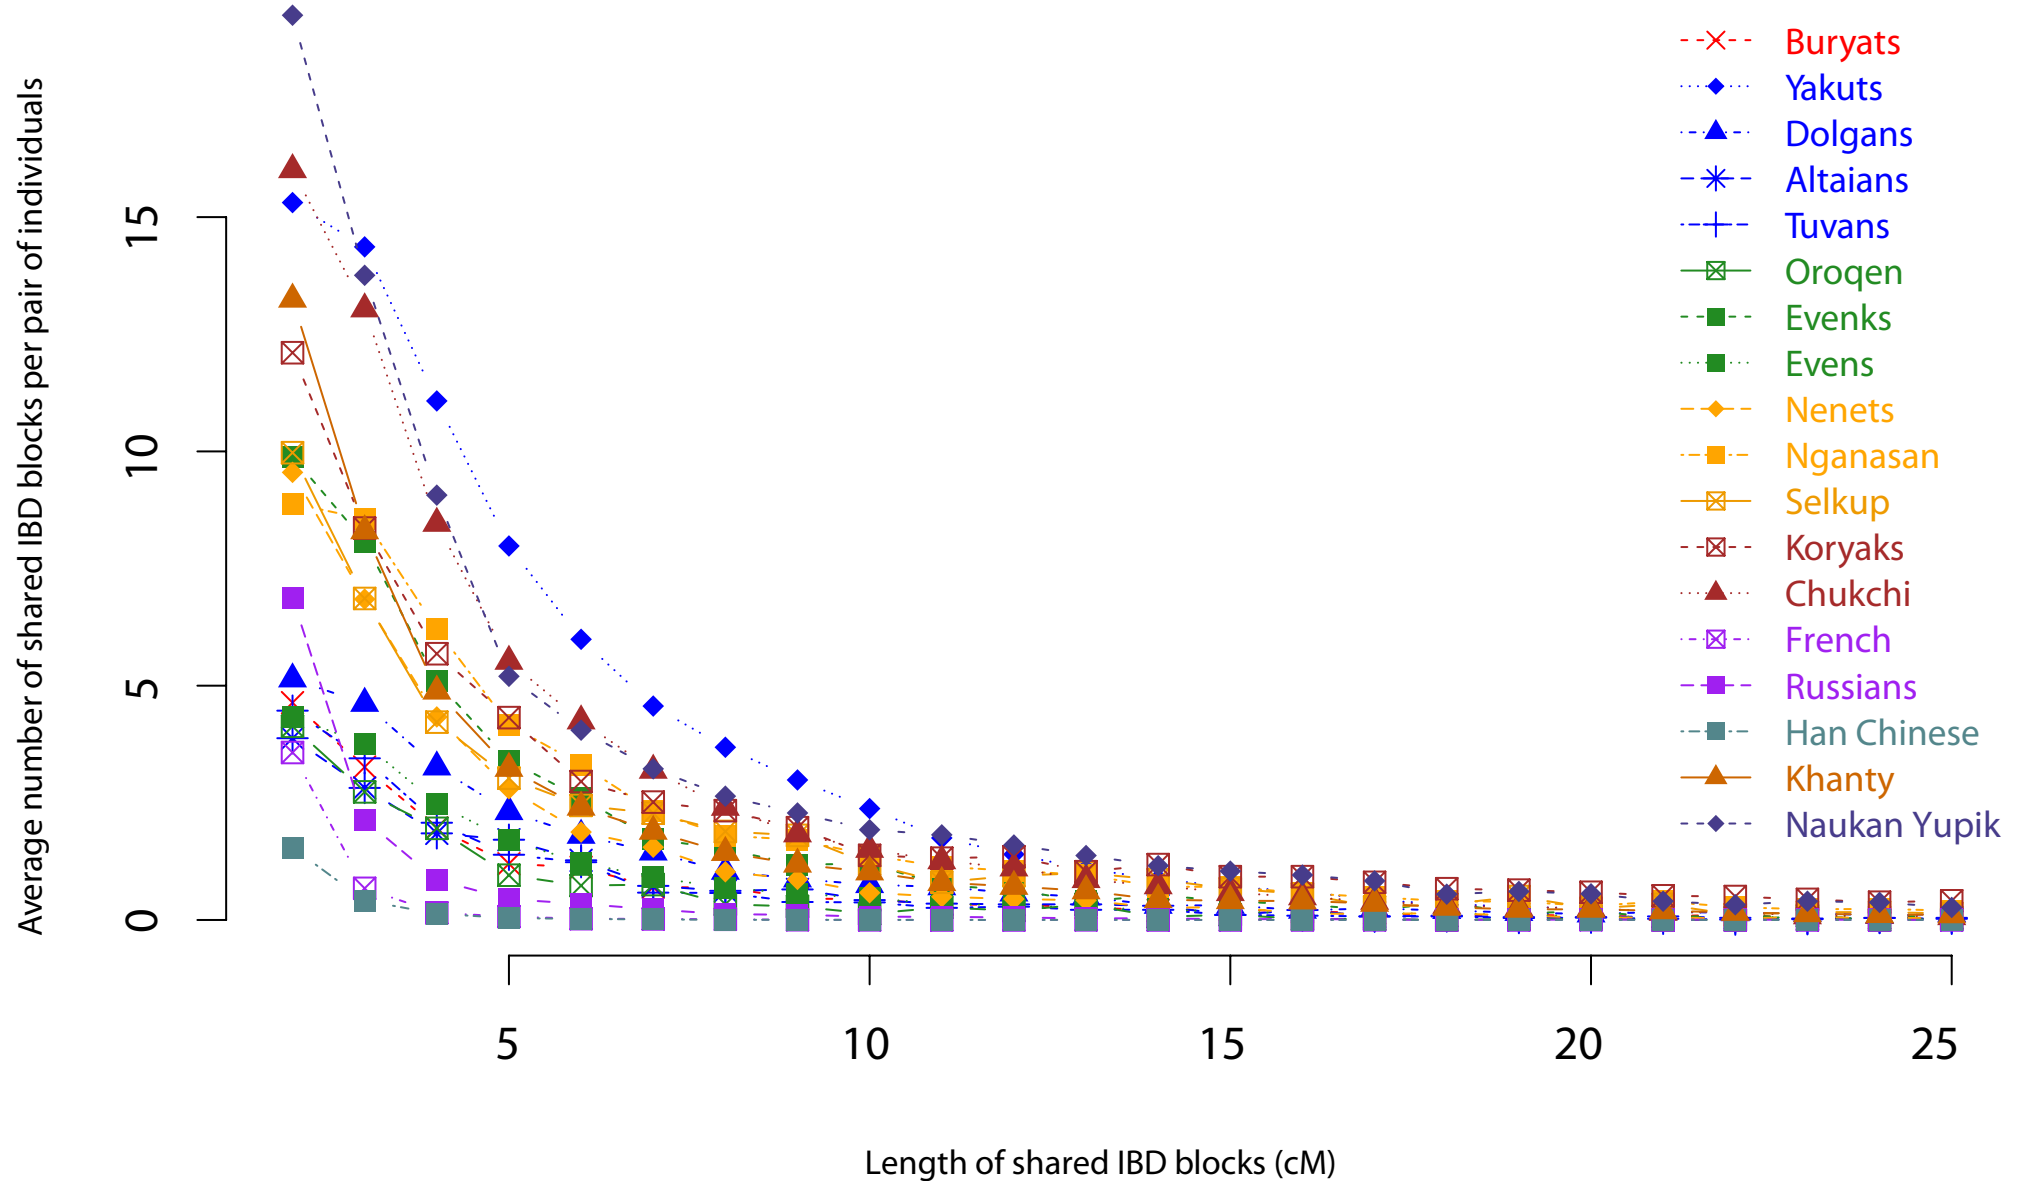

FIGURE S10. Analysis of IBD blocks shared within populations. The average number of IBD blocks shared per pair of individuals belonging to the same population is plotted against the genetic length of such blocks (blocks smaller than 2 cM were excluded from the analysis). Populations are coloured according to their linguistic affiliation, and the colouring scheme is described in the legend to Figure 1 of the main text.

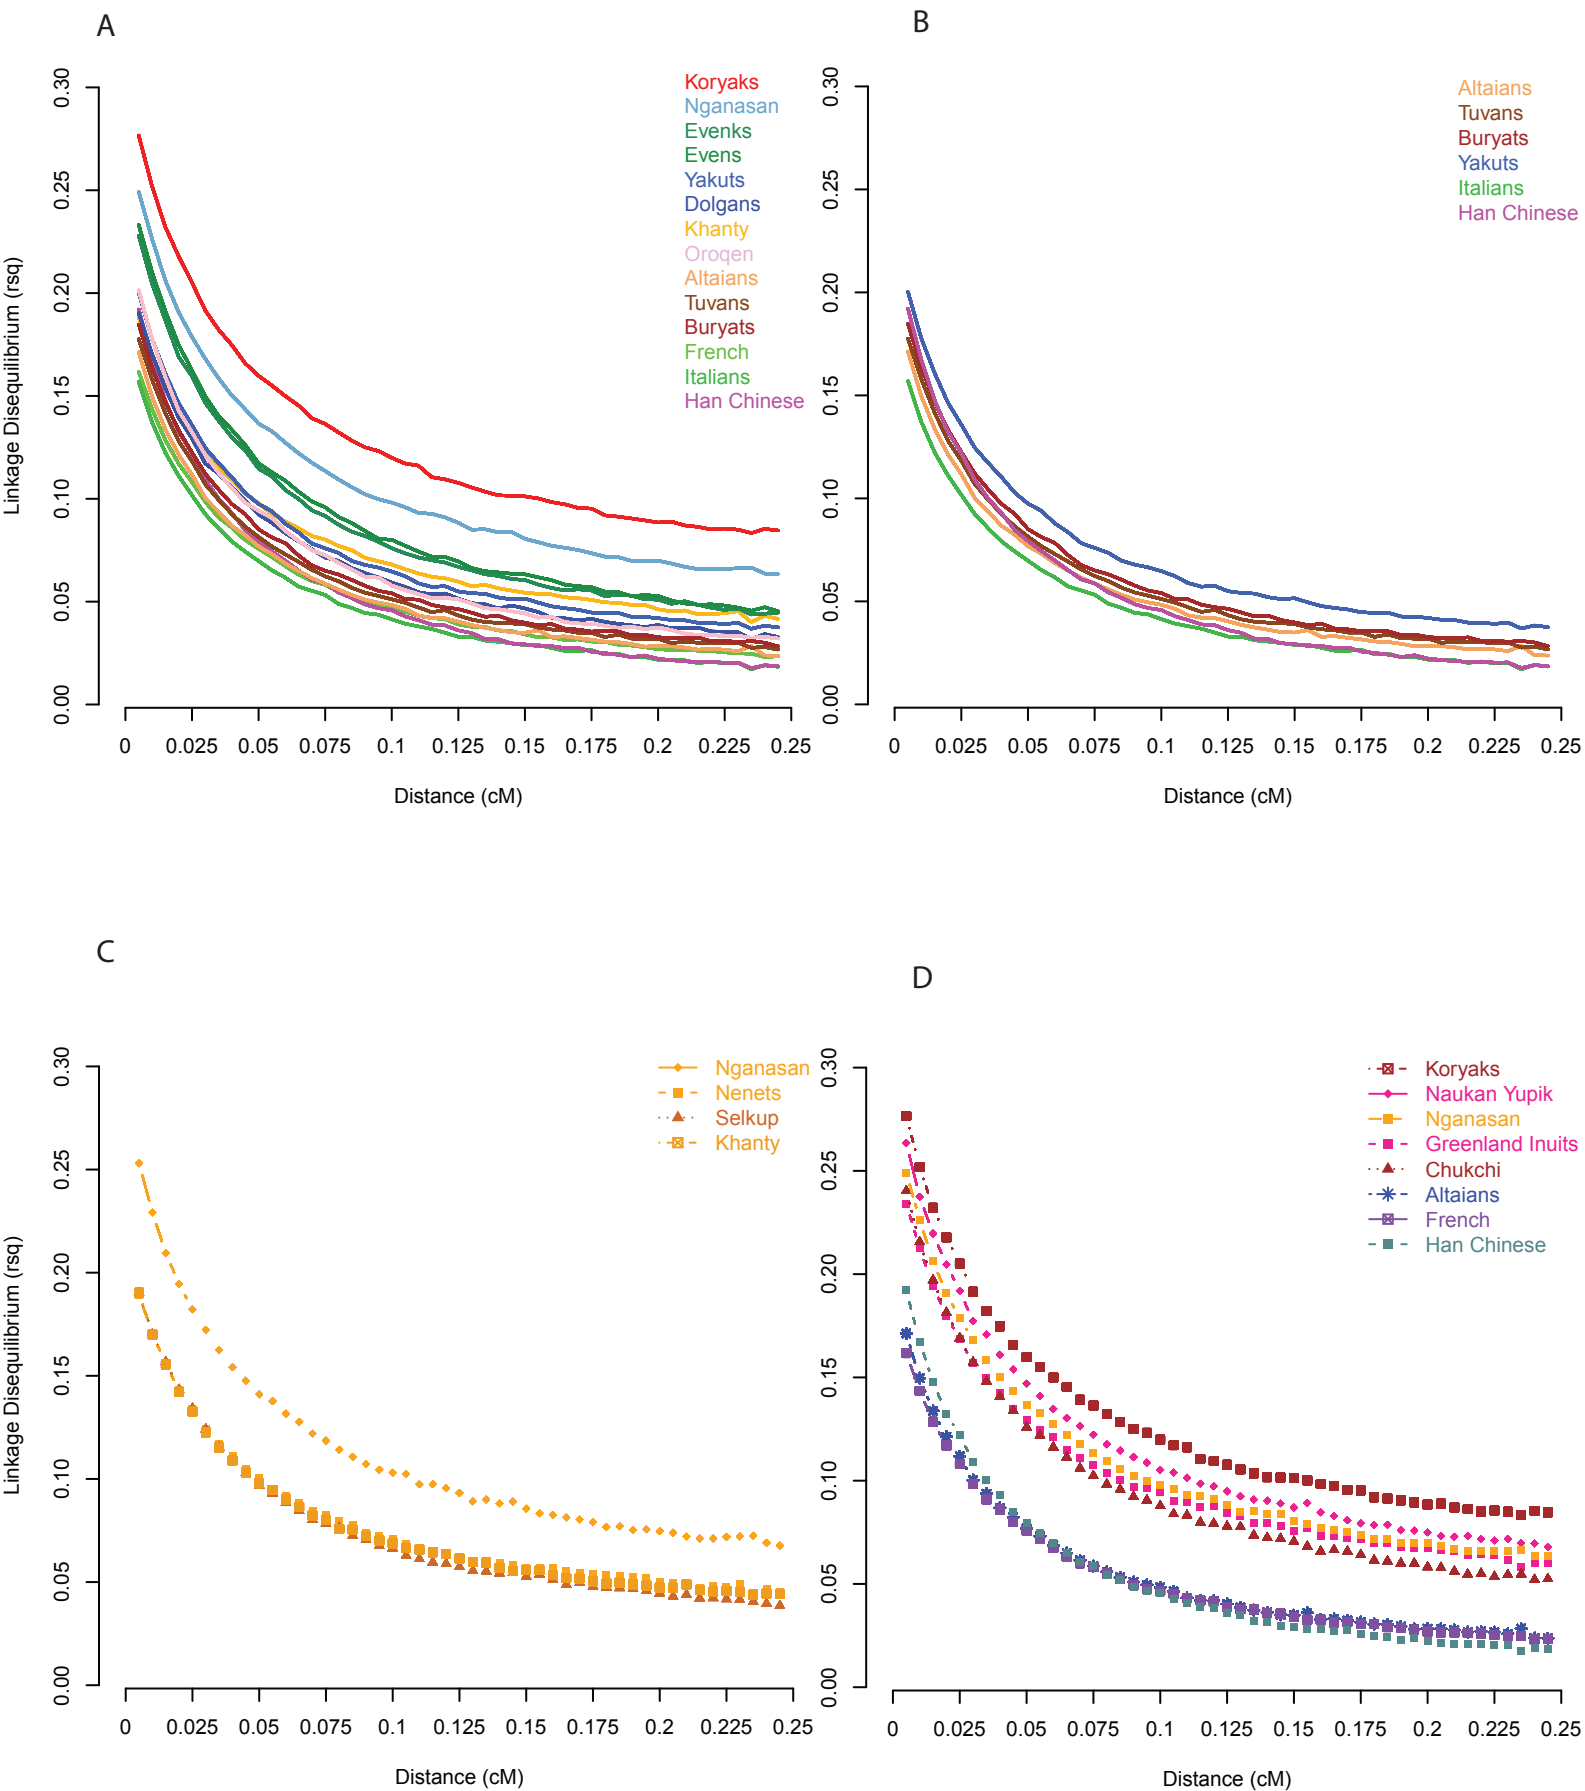

FIGURE S11. LD patterns in populations of Siberia. Linkage disequilibrium (LD) is measured for each population and each pair of SNPs within 50 evenly spaced recombination distance categories. The shortest genetic distances between the SNPs are represented on the left and the largest genetic distances on the right. (A) LD patterns in a representative subset of populations. (B) LD pattern in the Yakuts in comparison to Europeans, East Asians and populations of South Siberia. (C) LD pattern in the Nganasan in comparison to the other Samoyedic-speakers and the Ugric-speaking Khanty. (D) LD pattern in the populations that live on the margins of the Siberian landmass in comparison to Europeans, East Asians and Altaians of South Siberia.

Atai

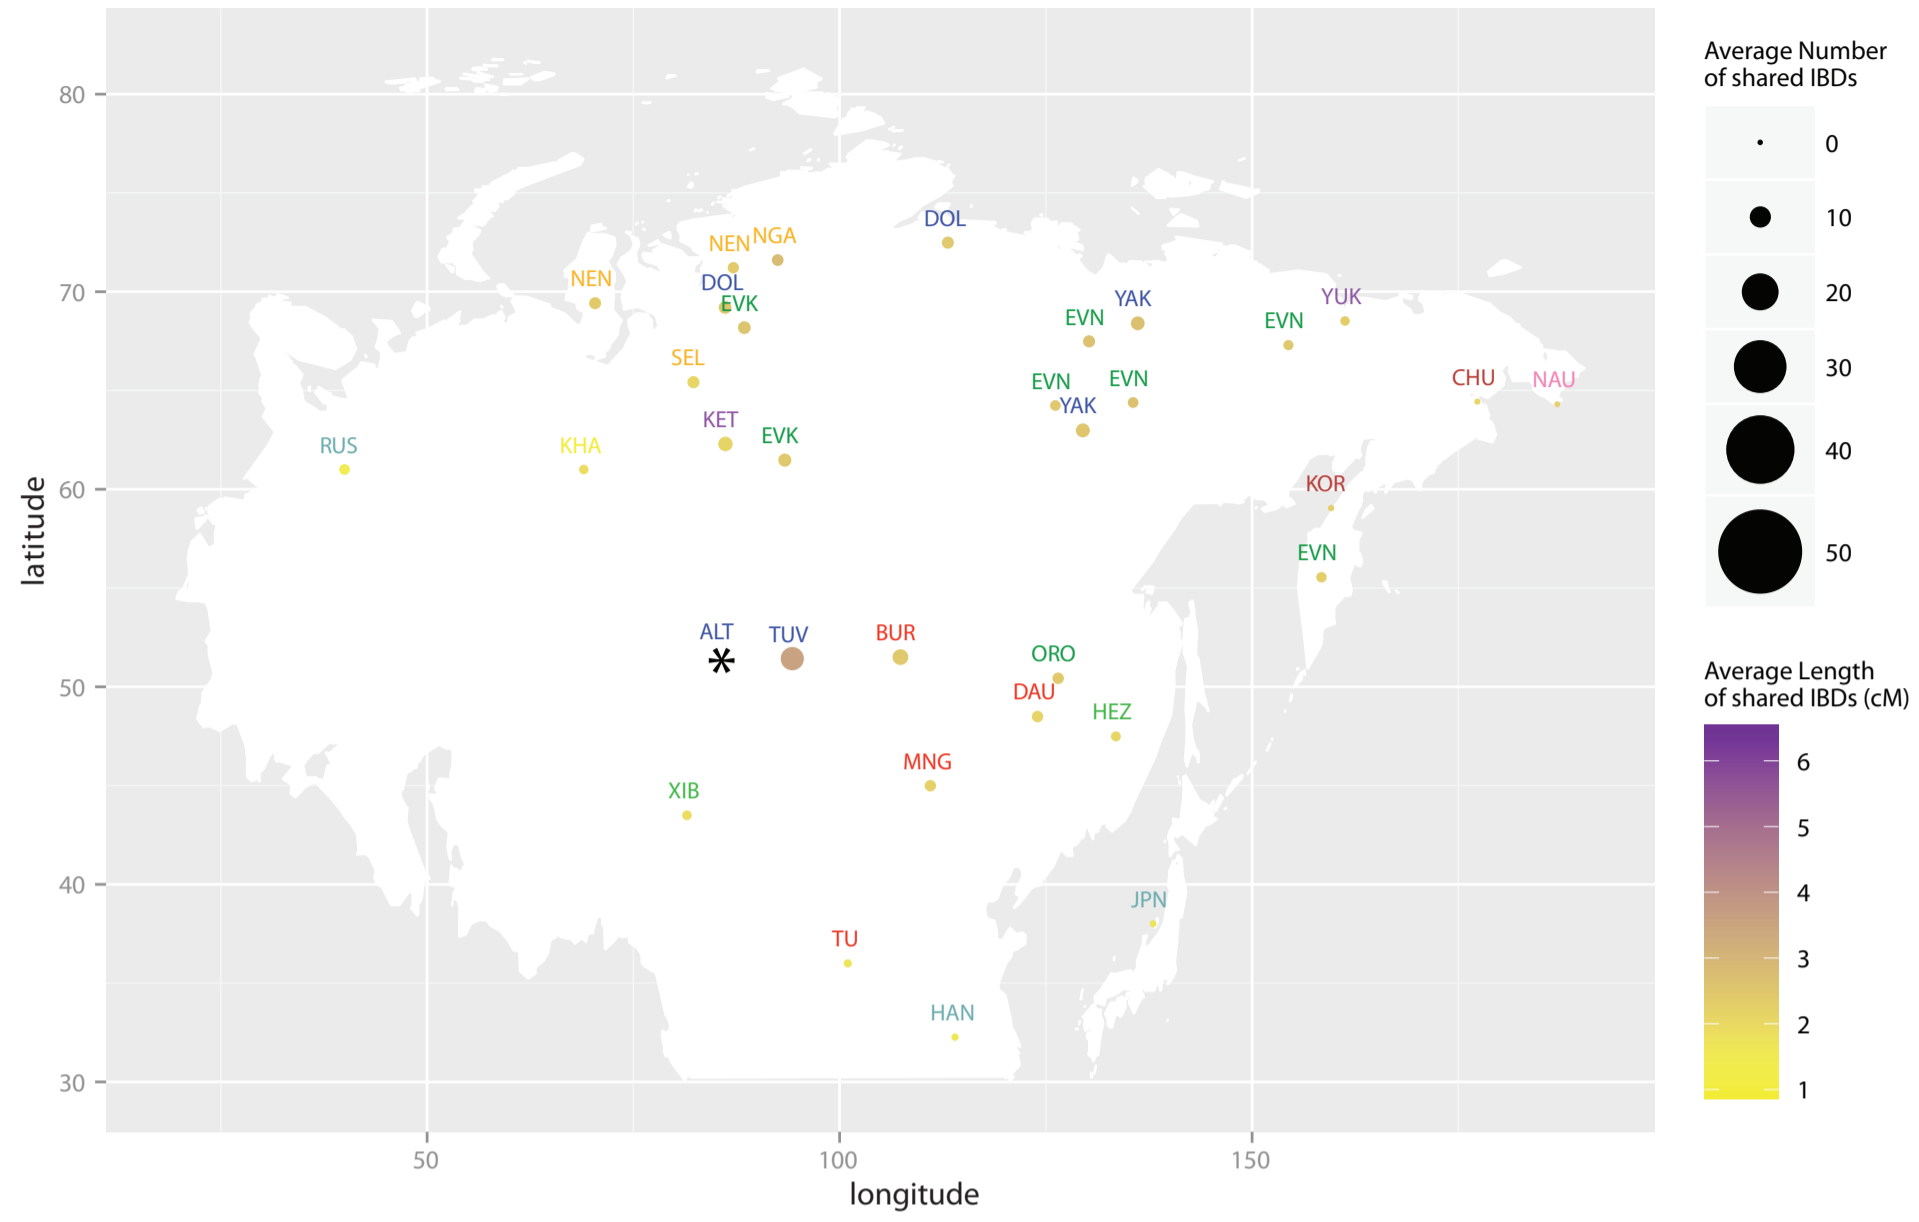

Buryats

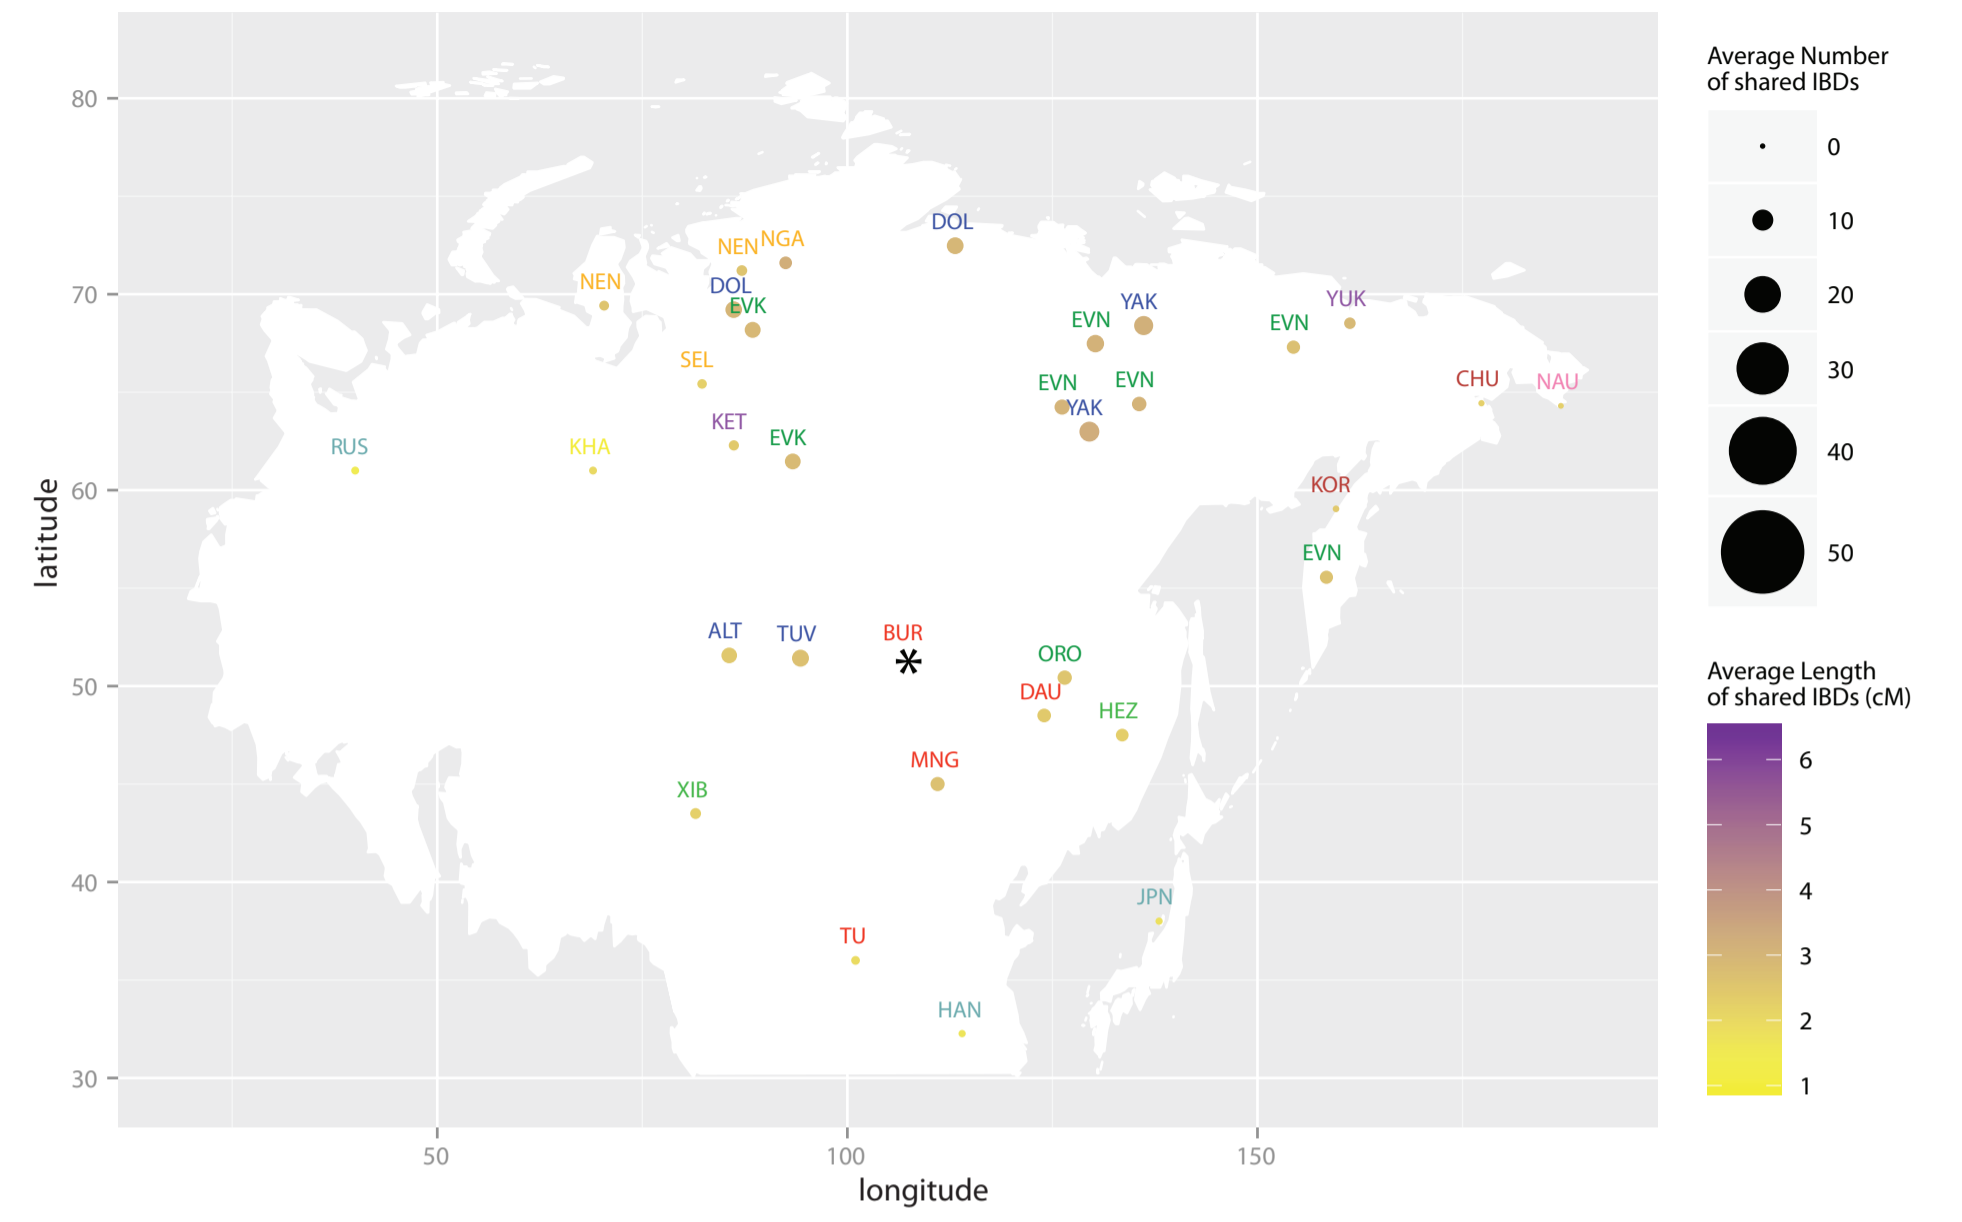

Daur

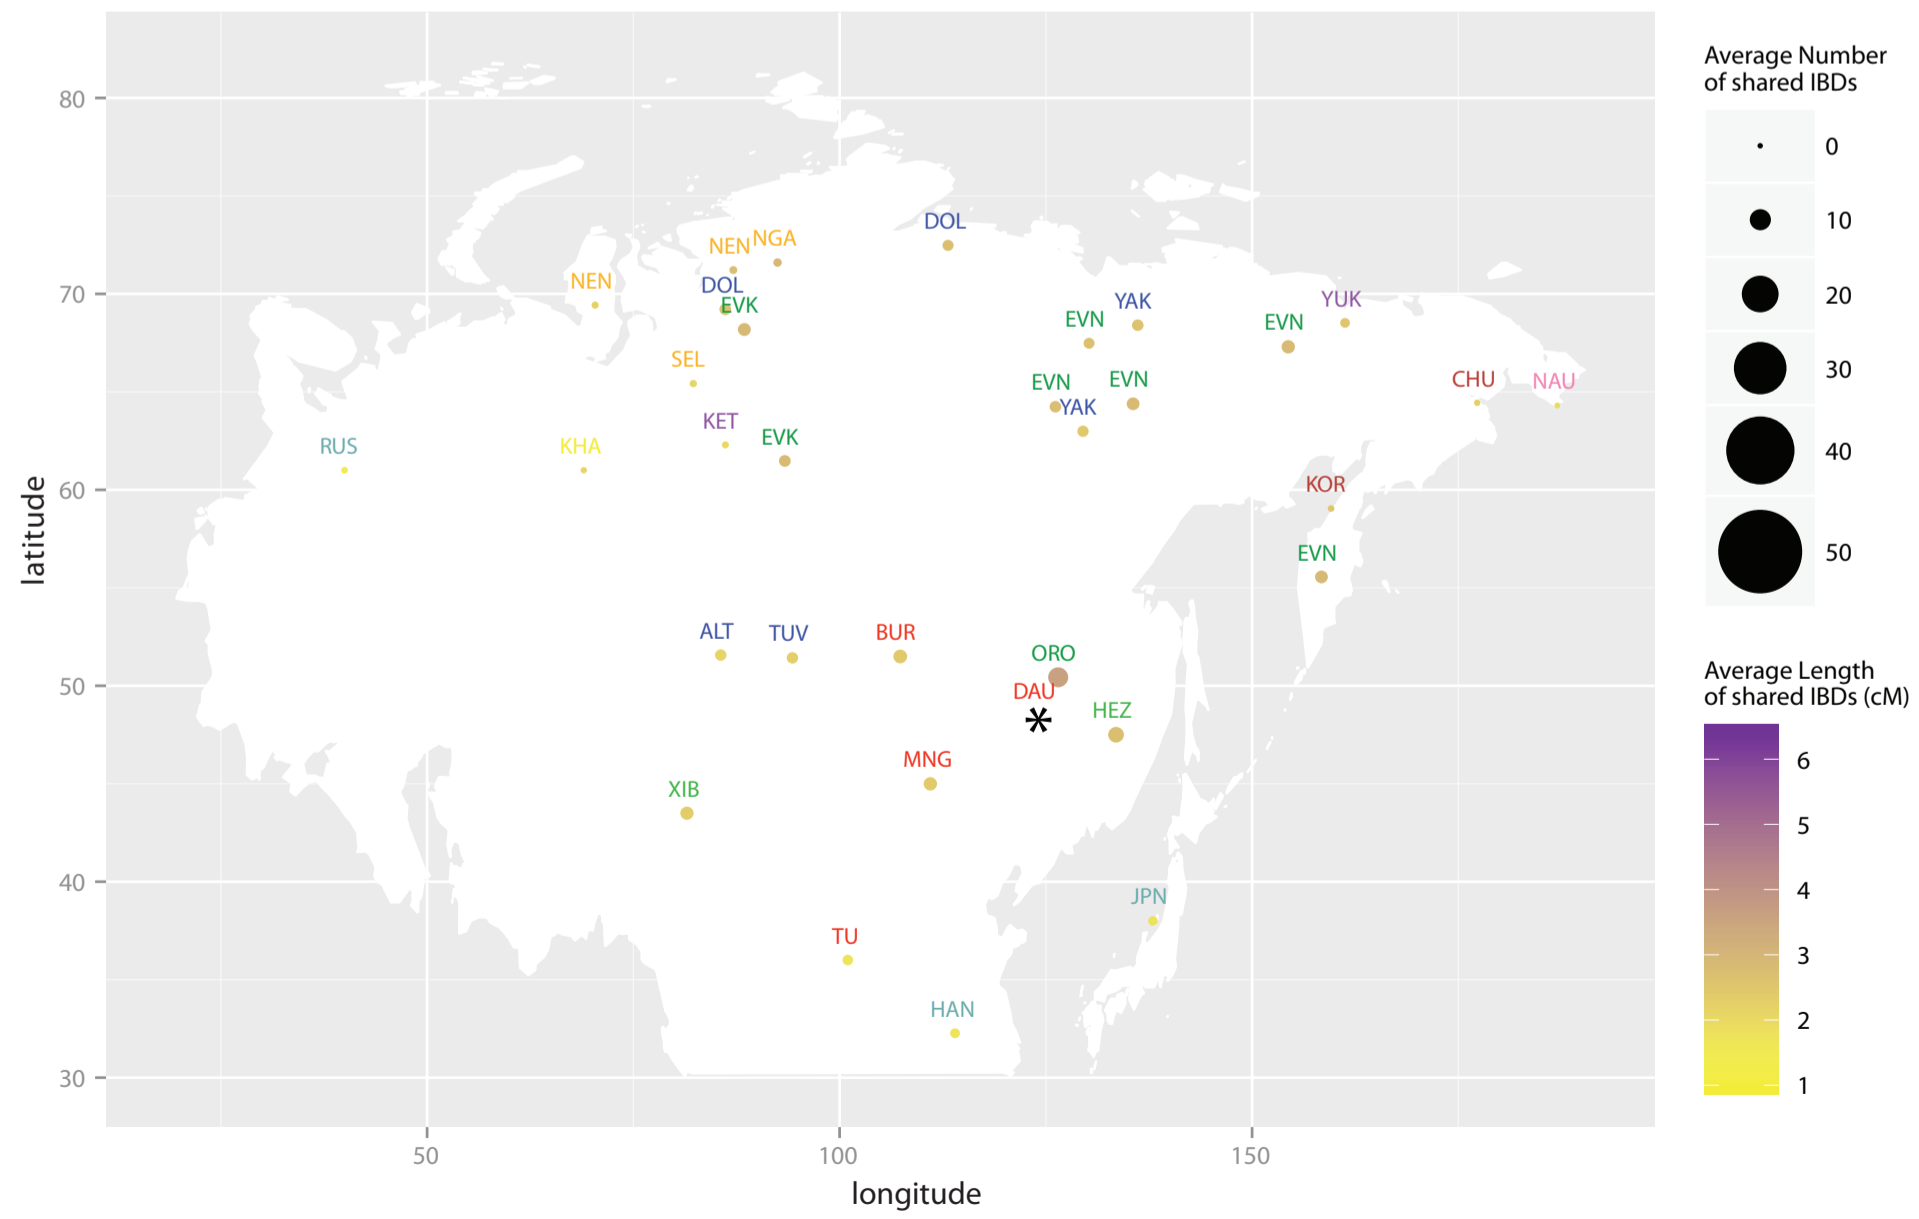

Dolgans Anabar

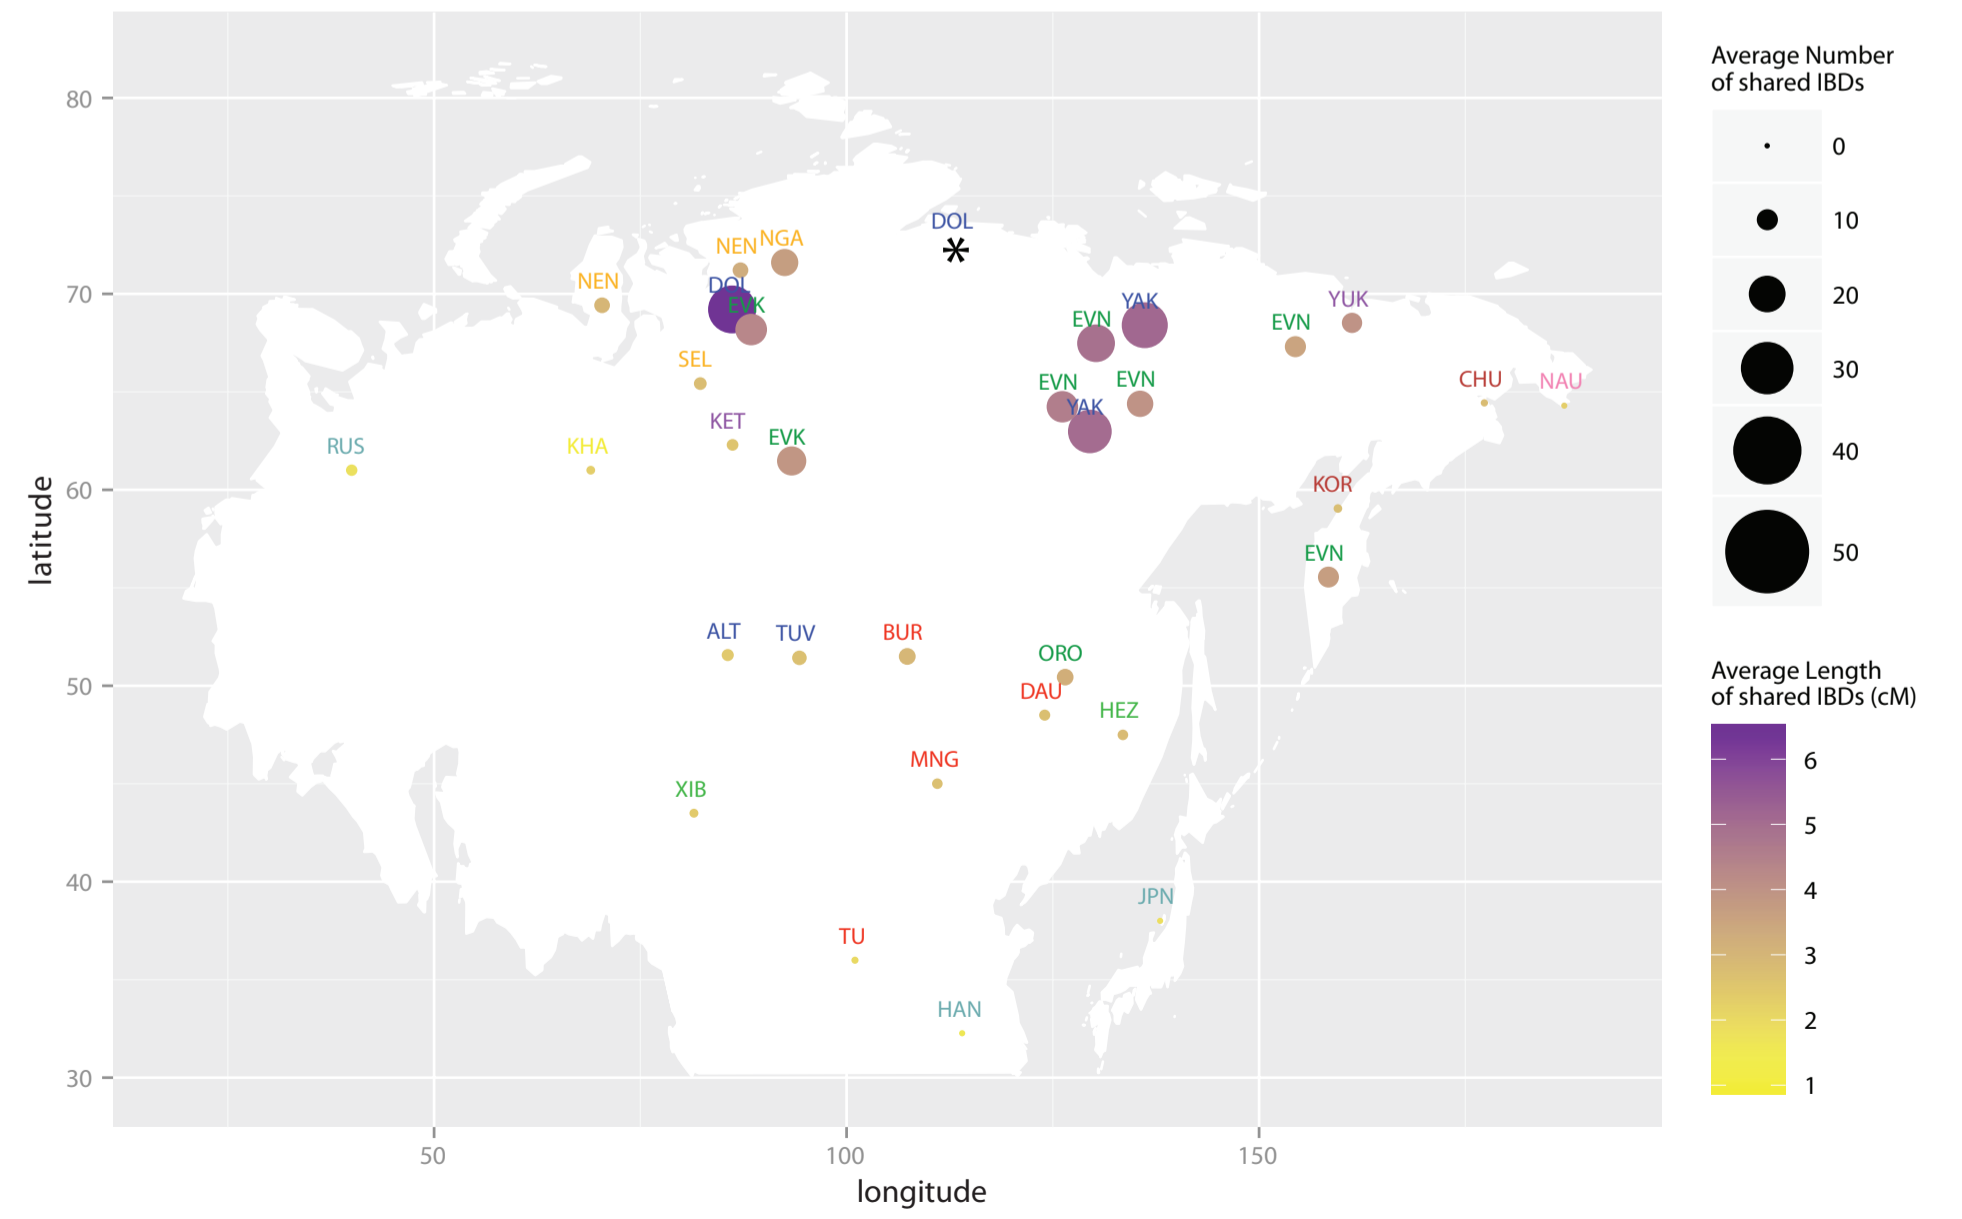

Dolgans Taimyr

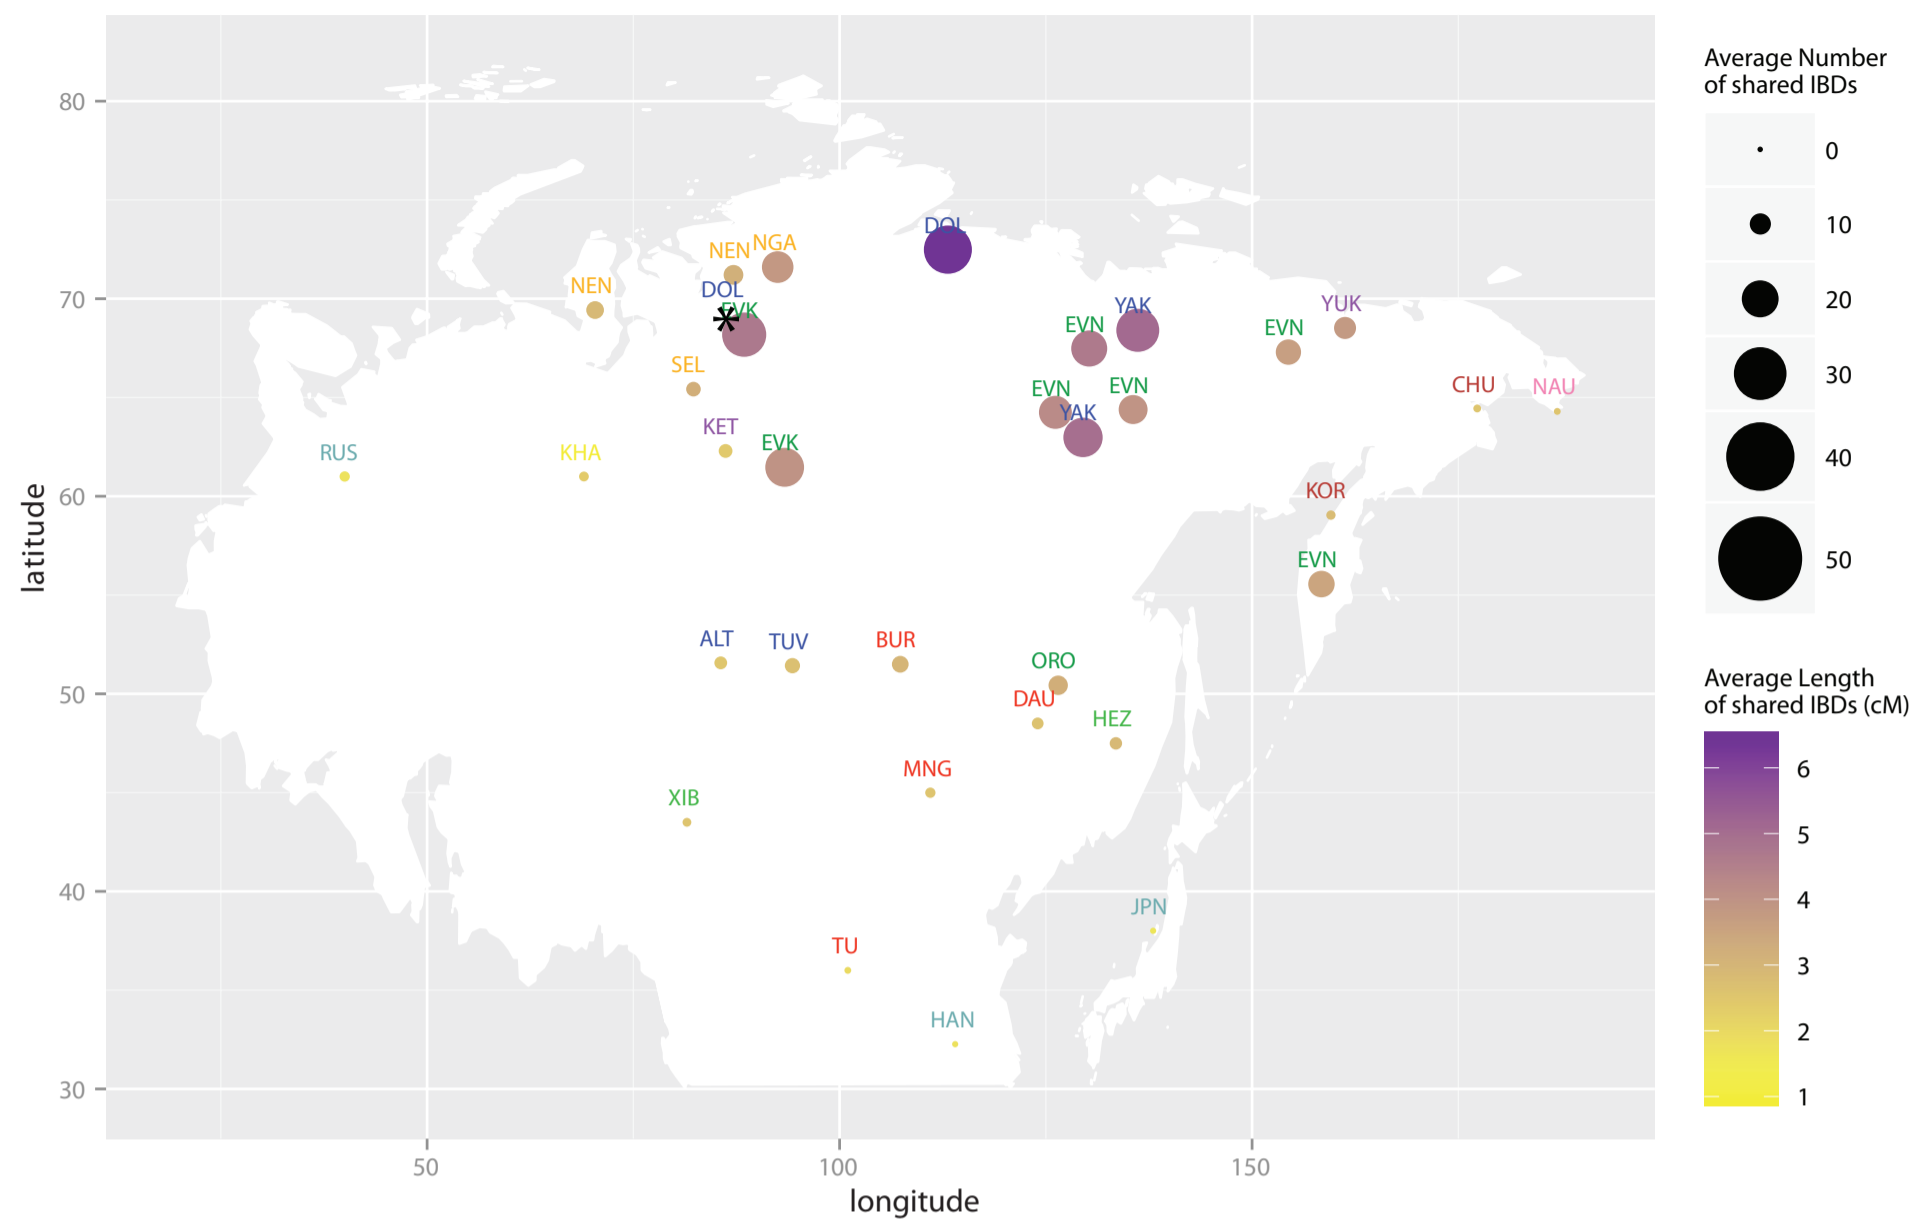

Evenks Stony-Tunguska

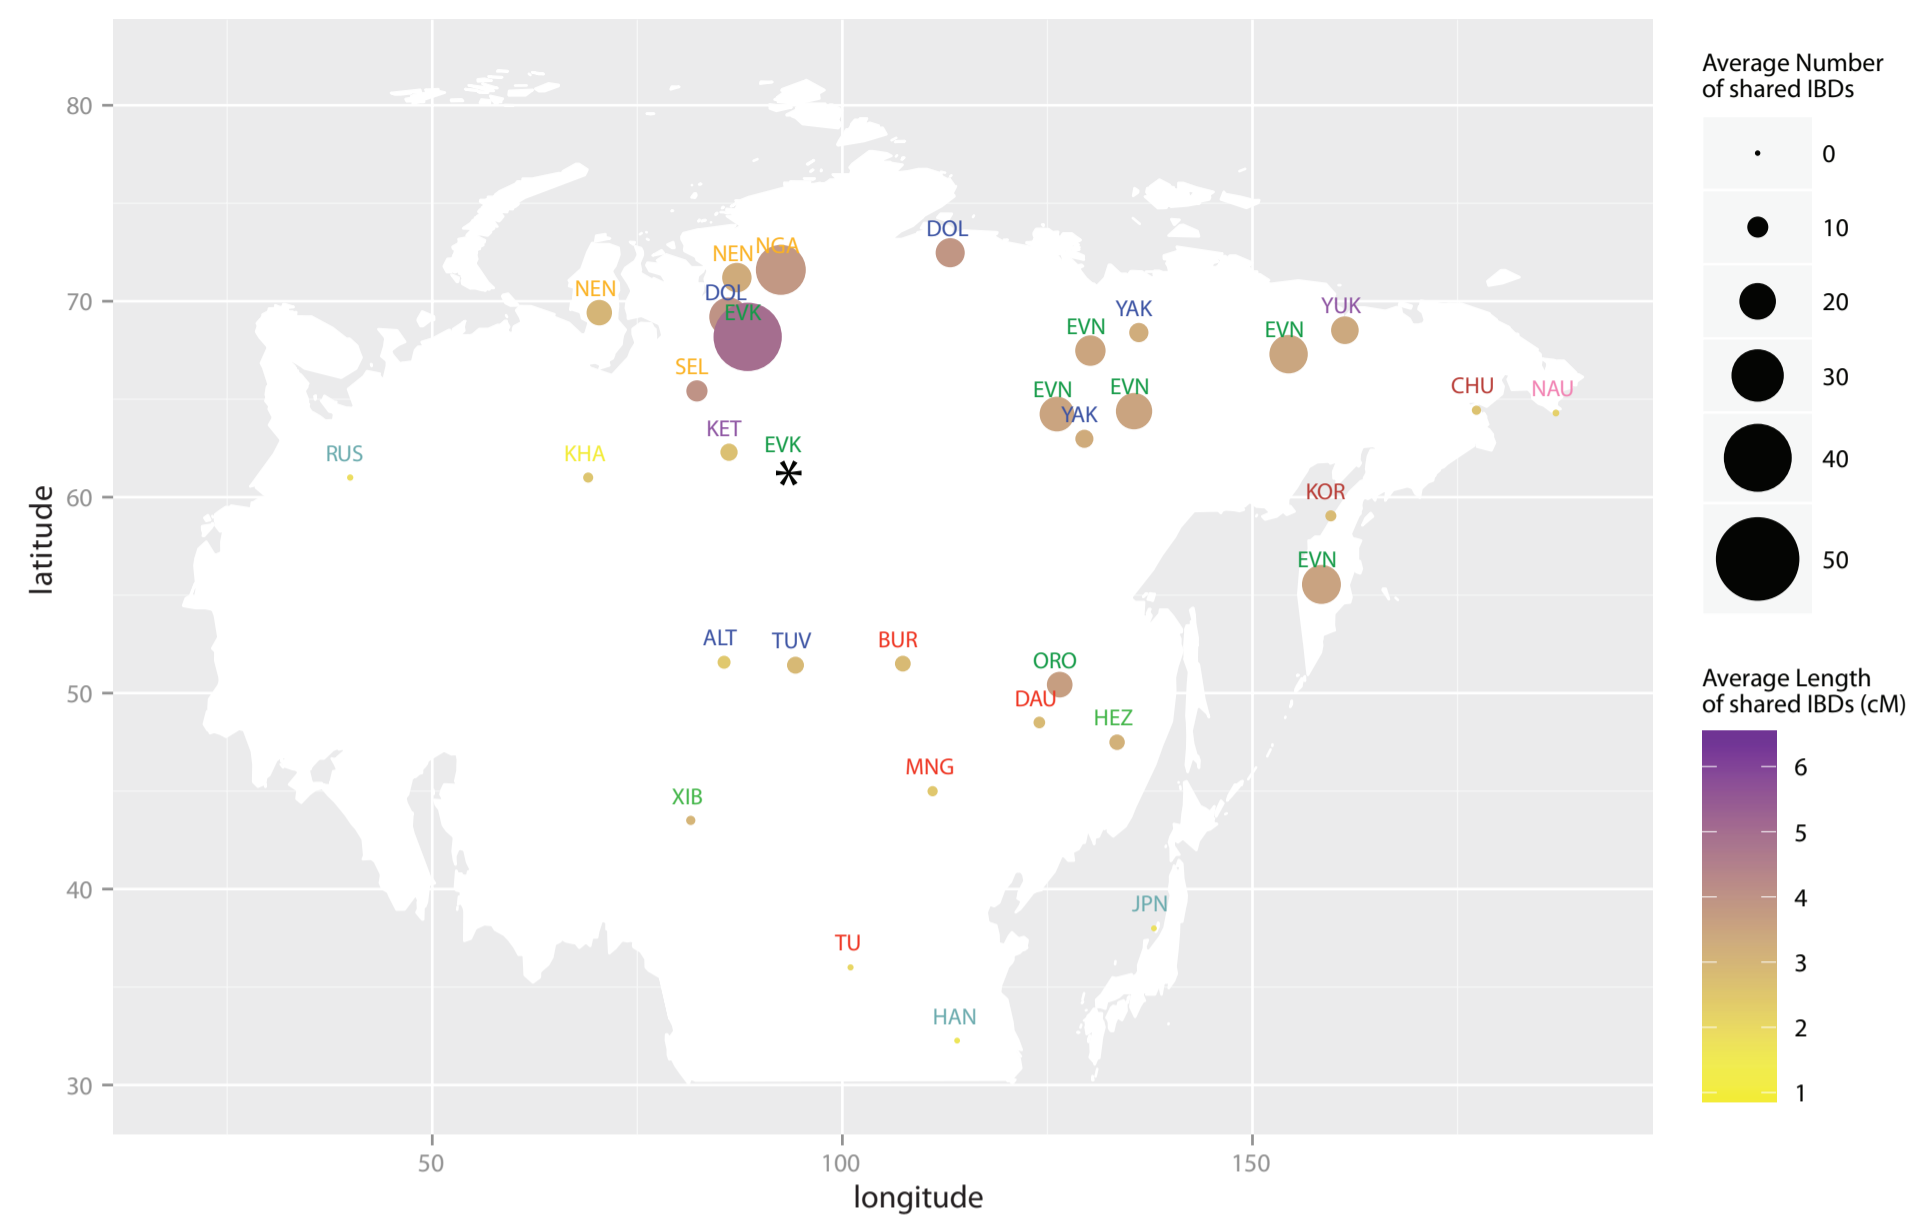

Evenks Taimyr

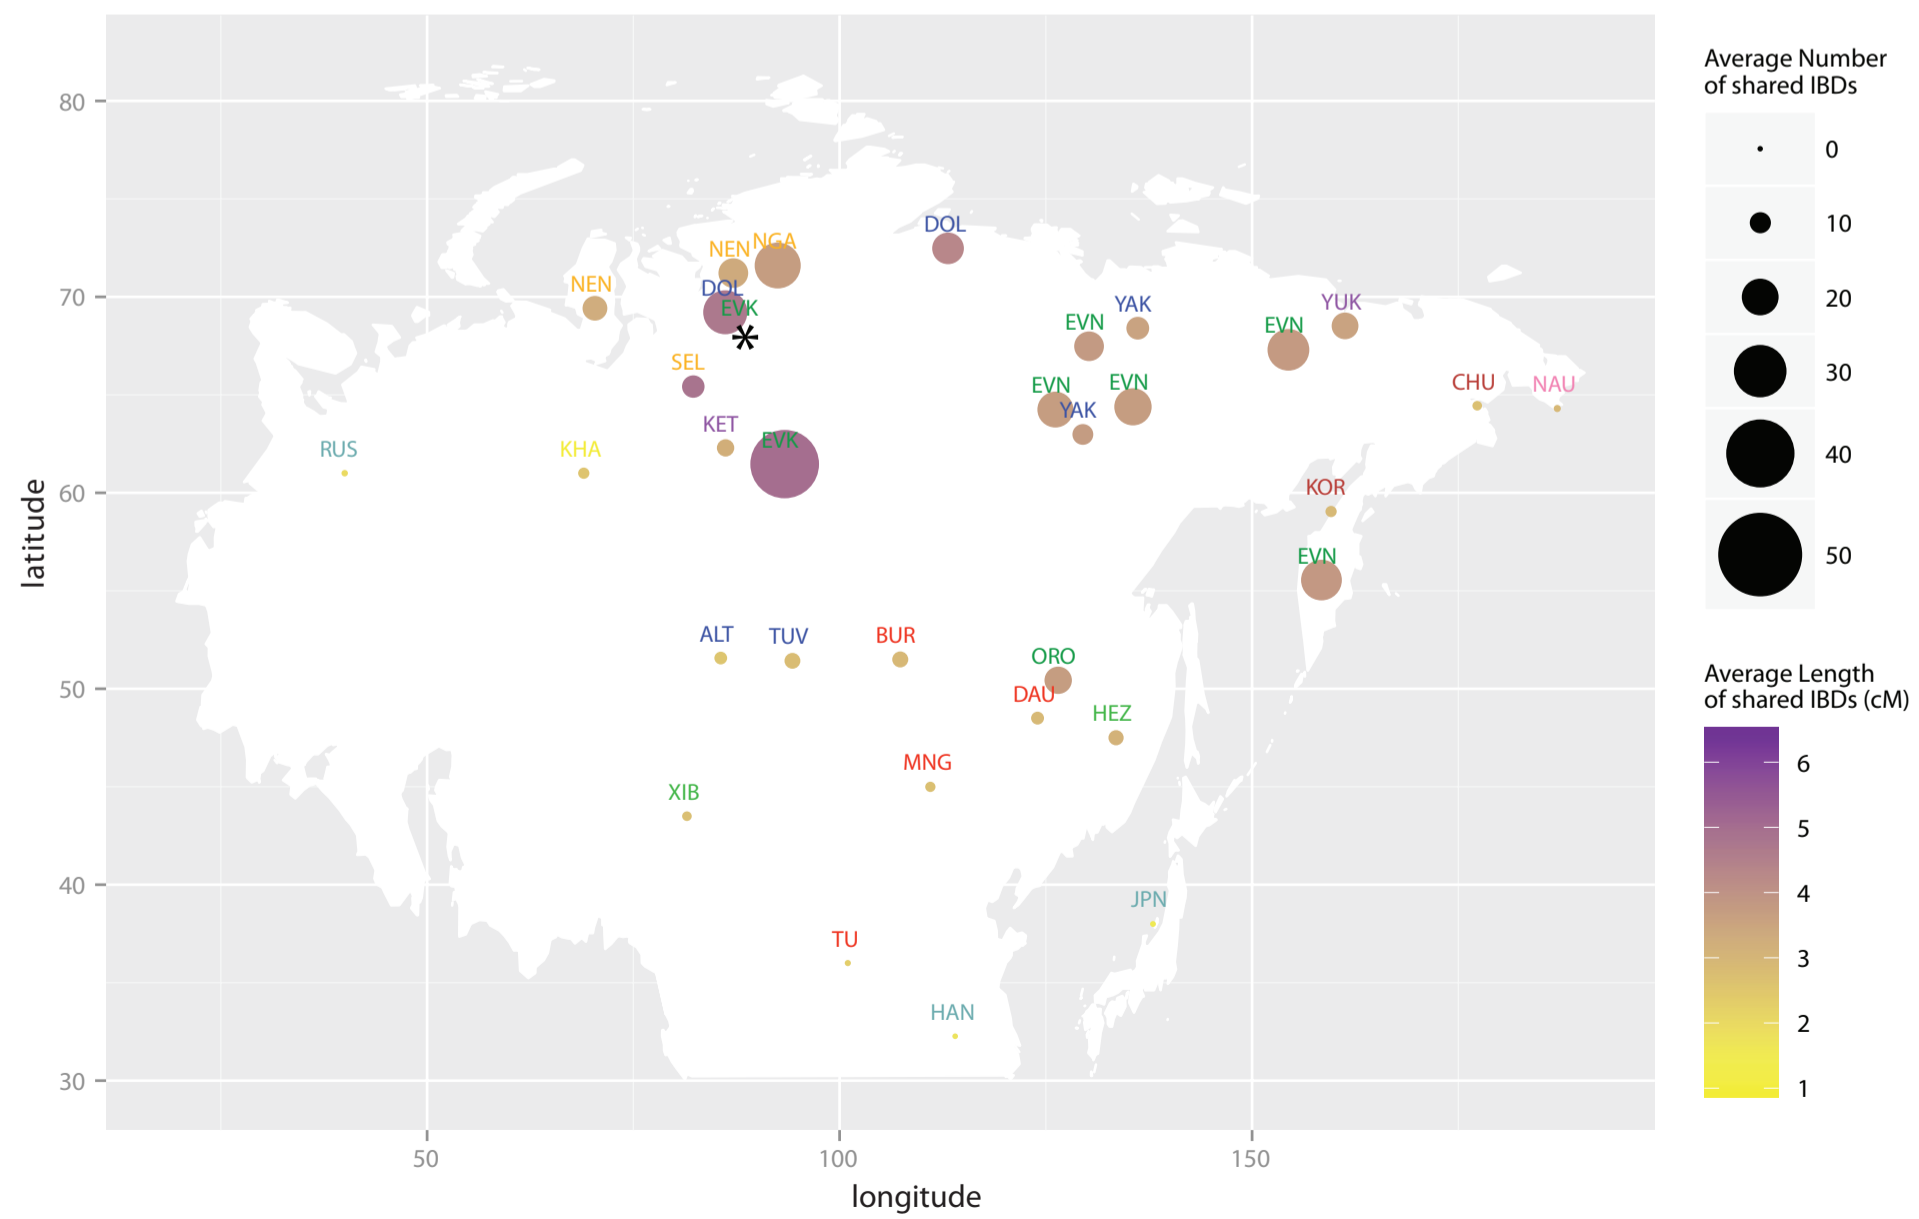

Evens Berezovka

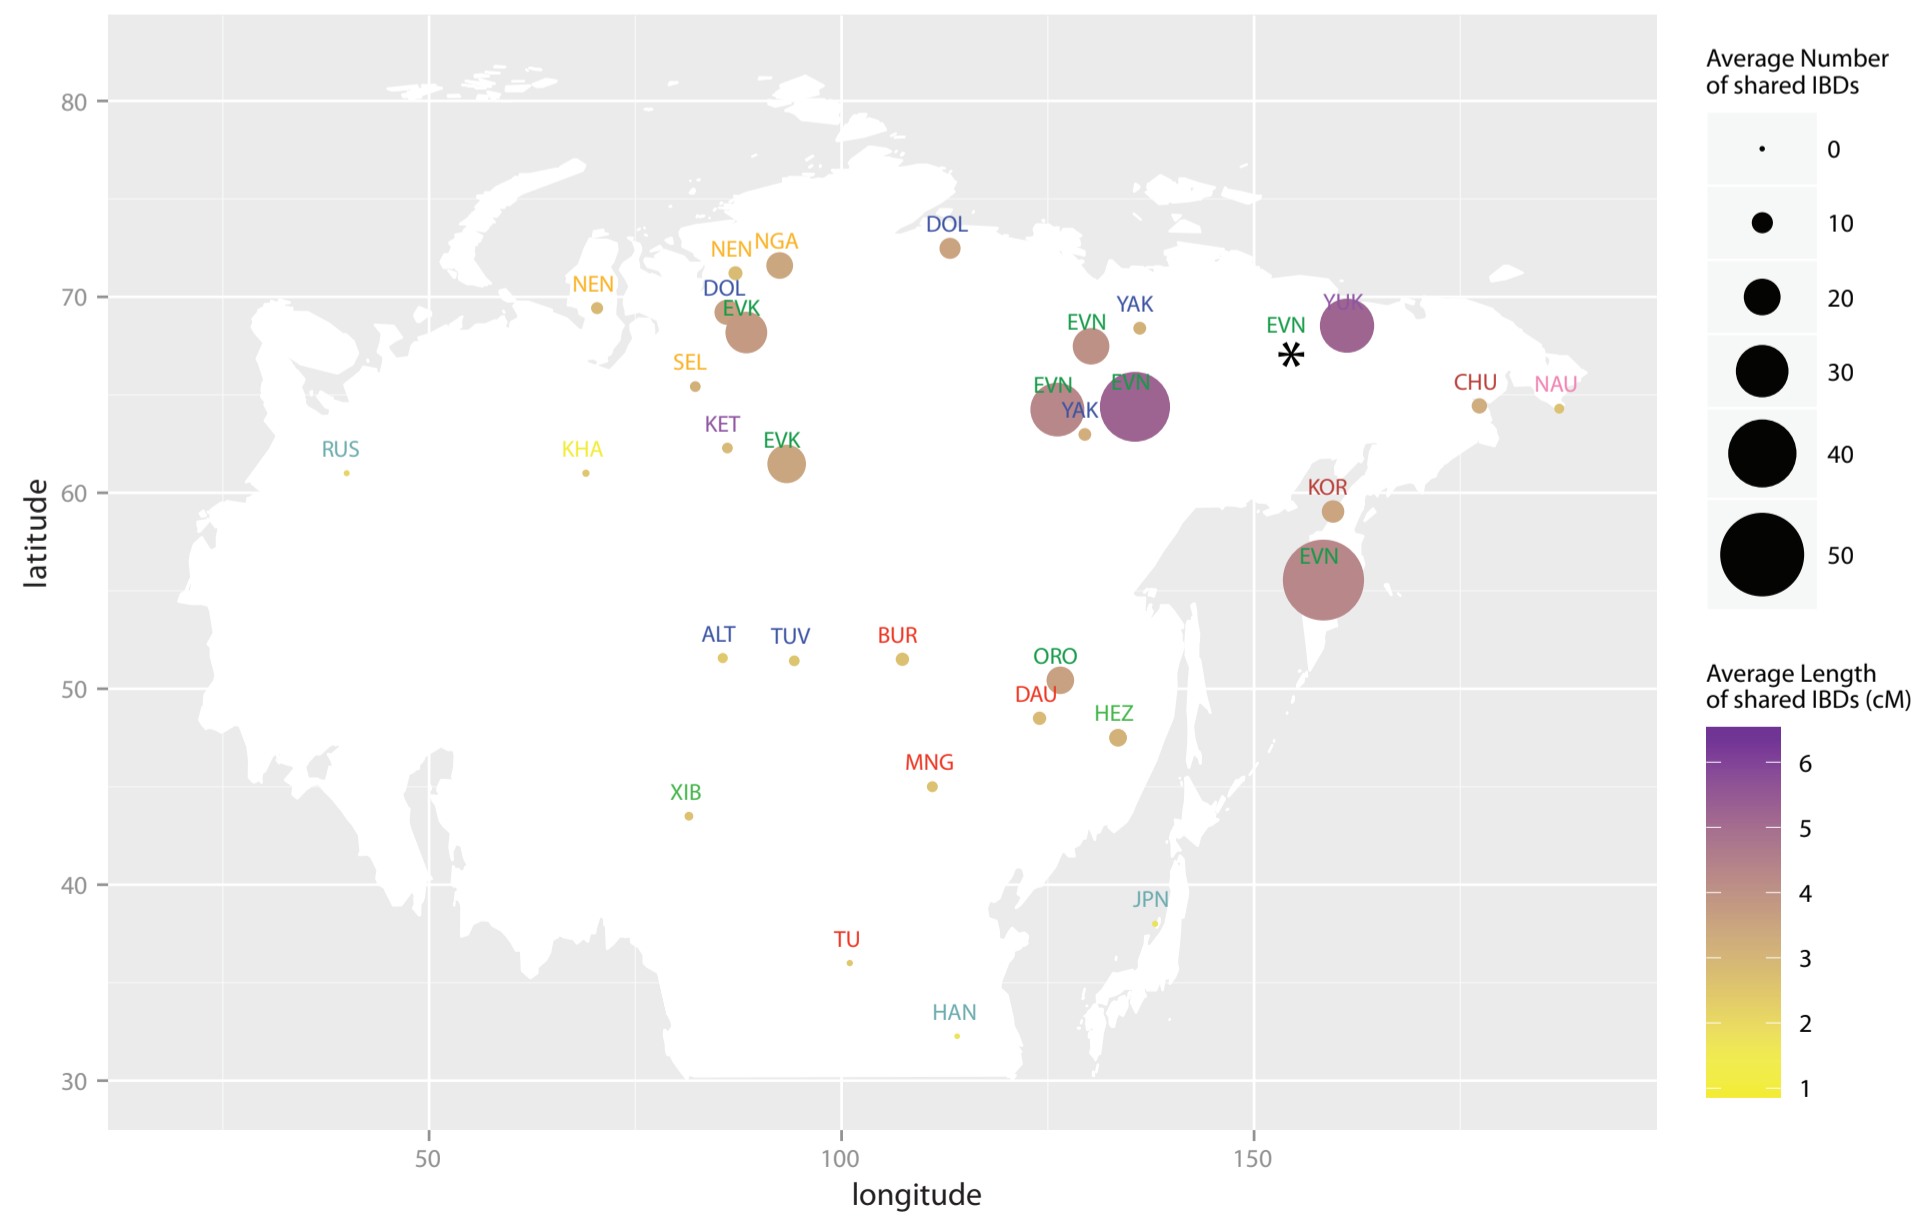

Evens Kamchatka

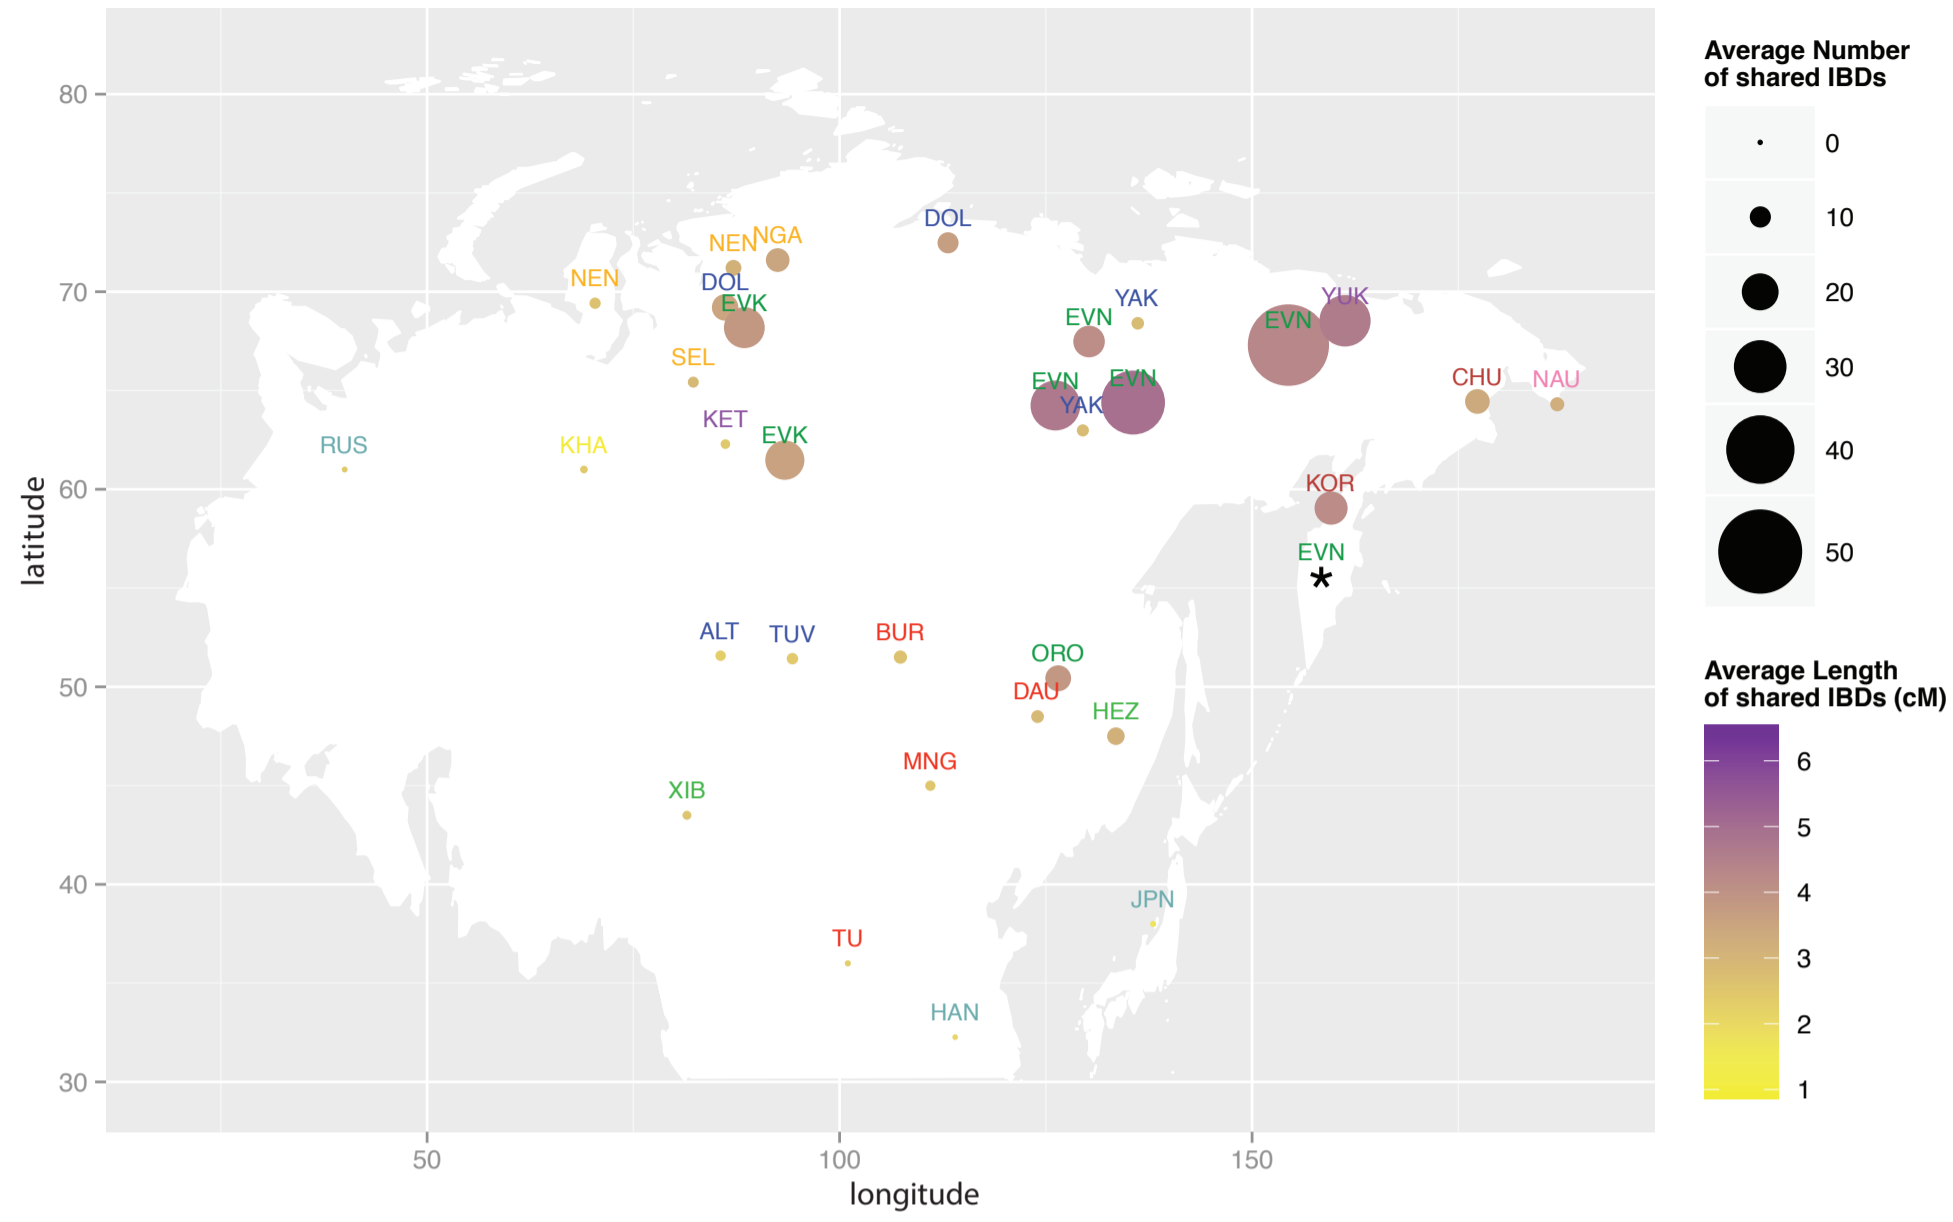

Evens Sakkyryr

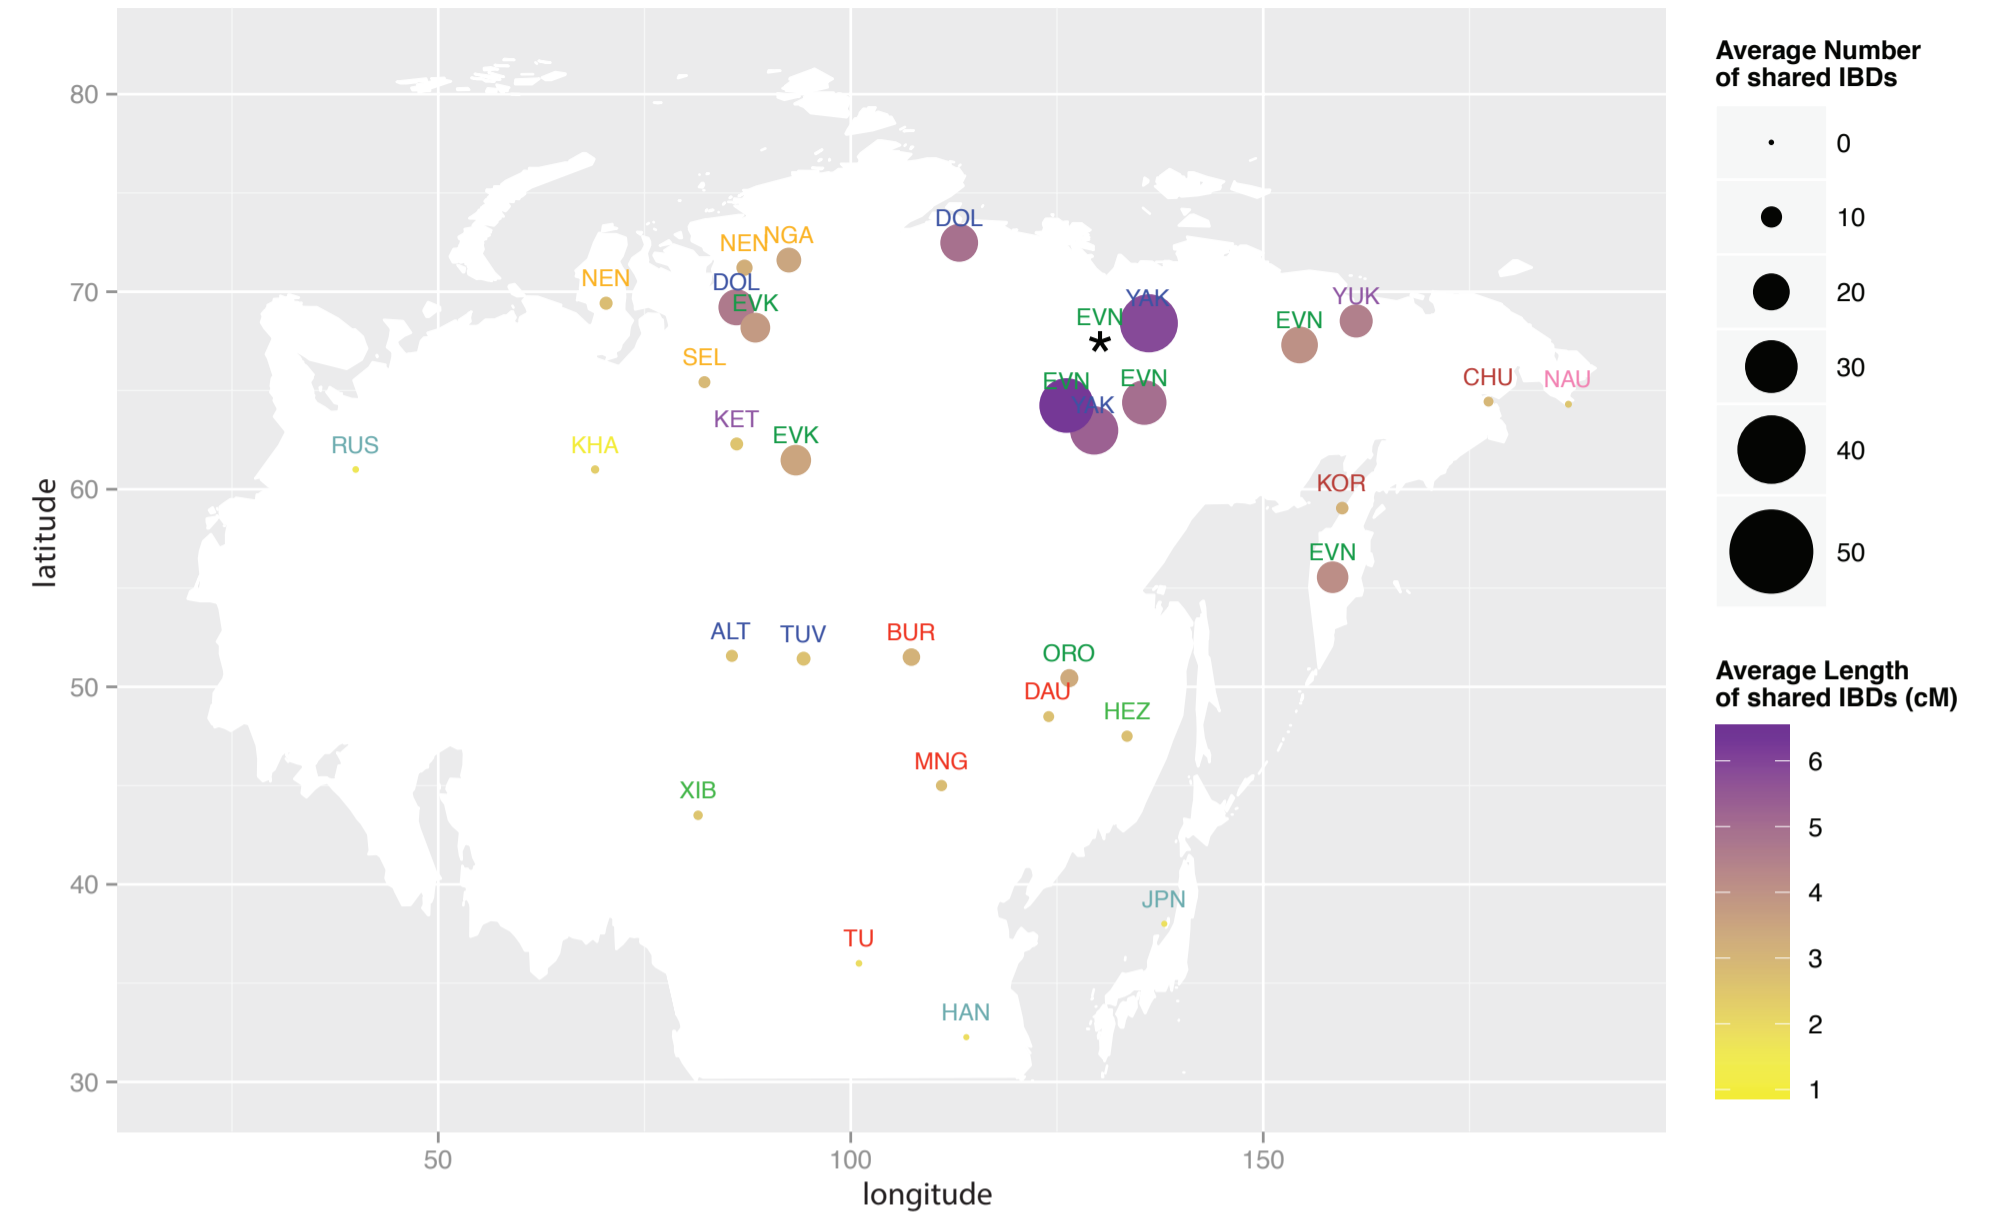

Evens Sebjan

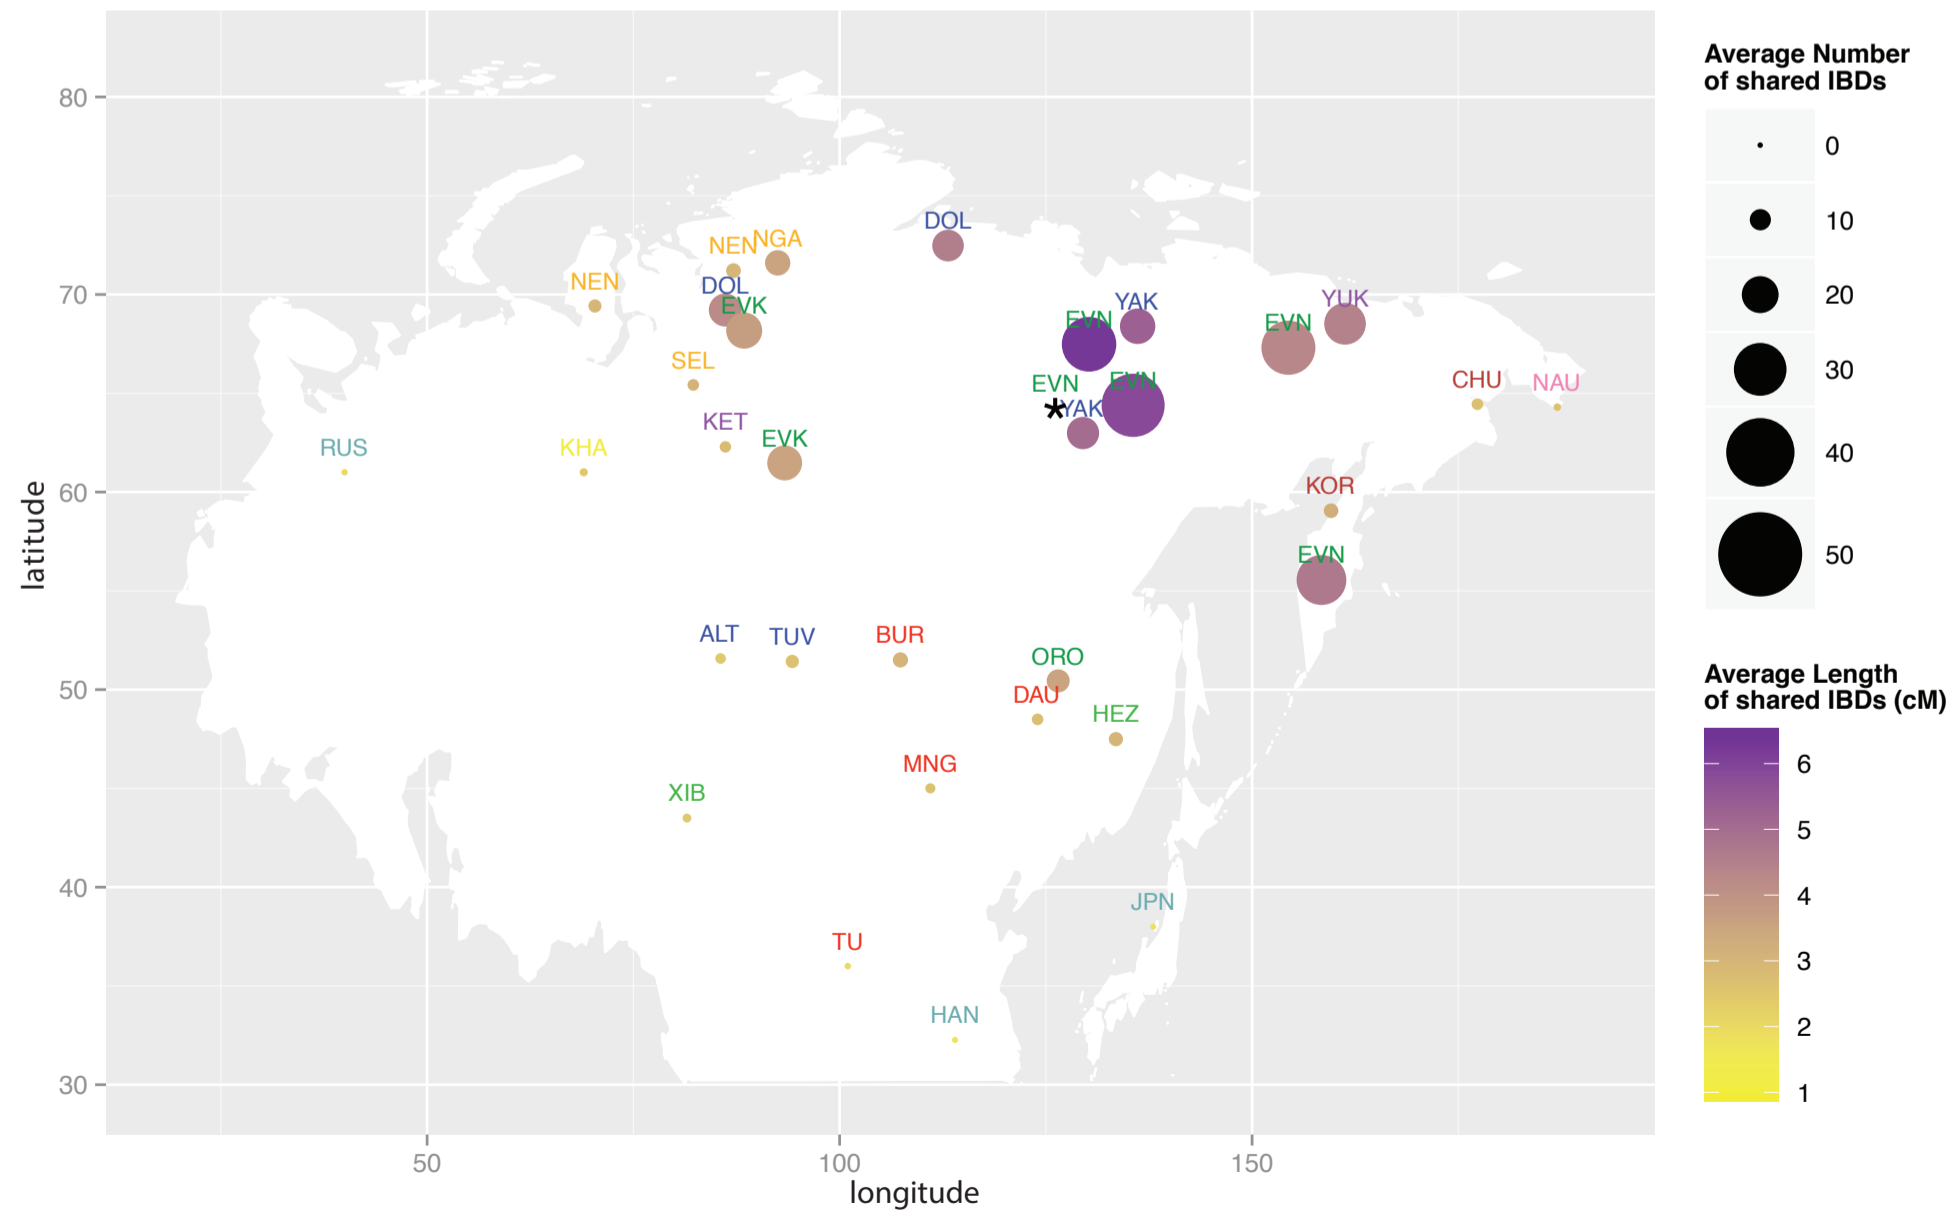

Han Chinese

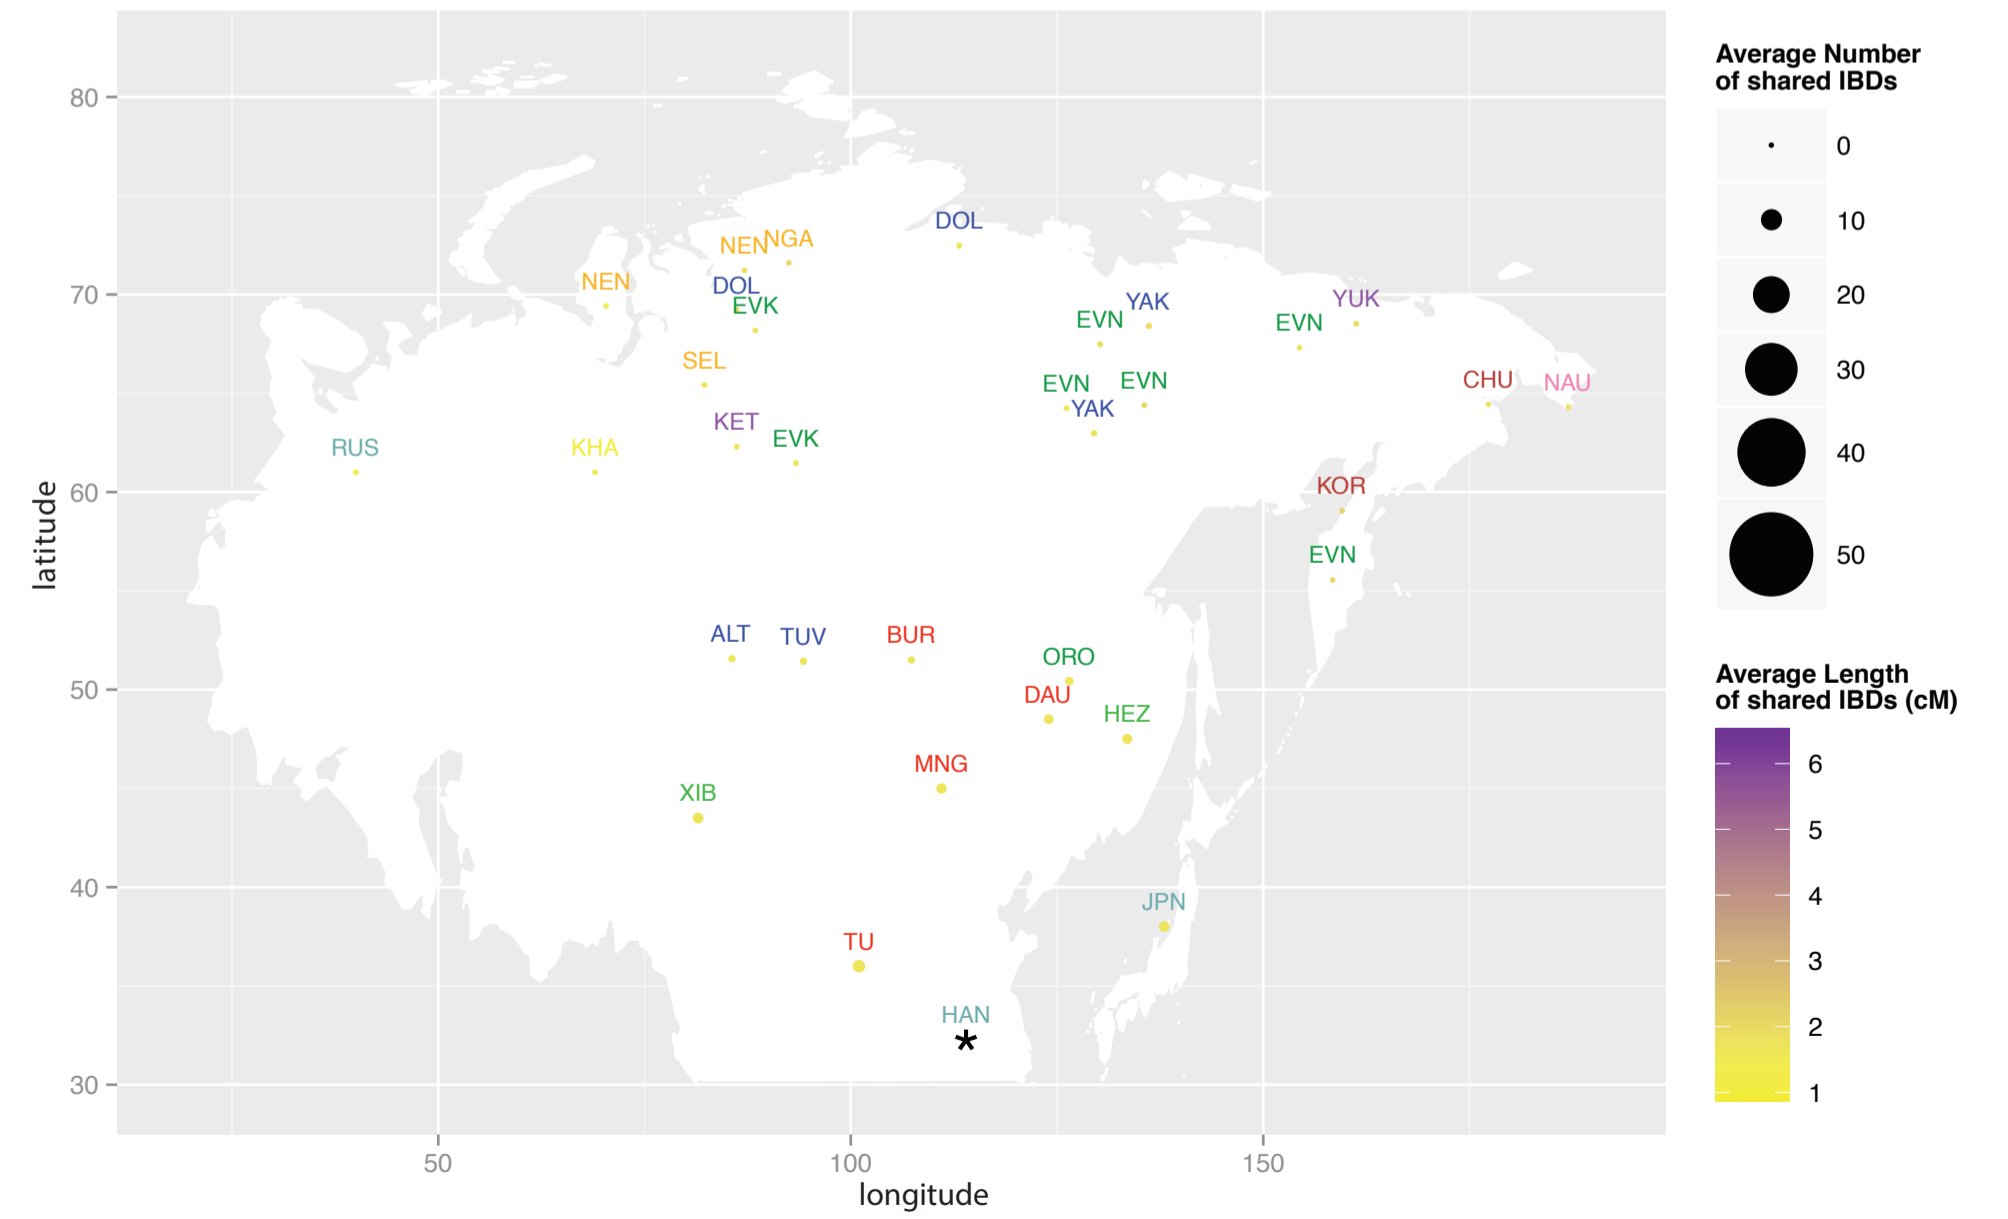

Hezhen Nanai

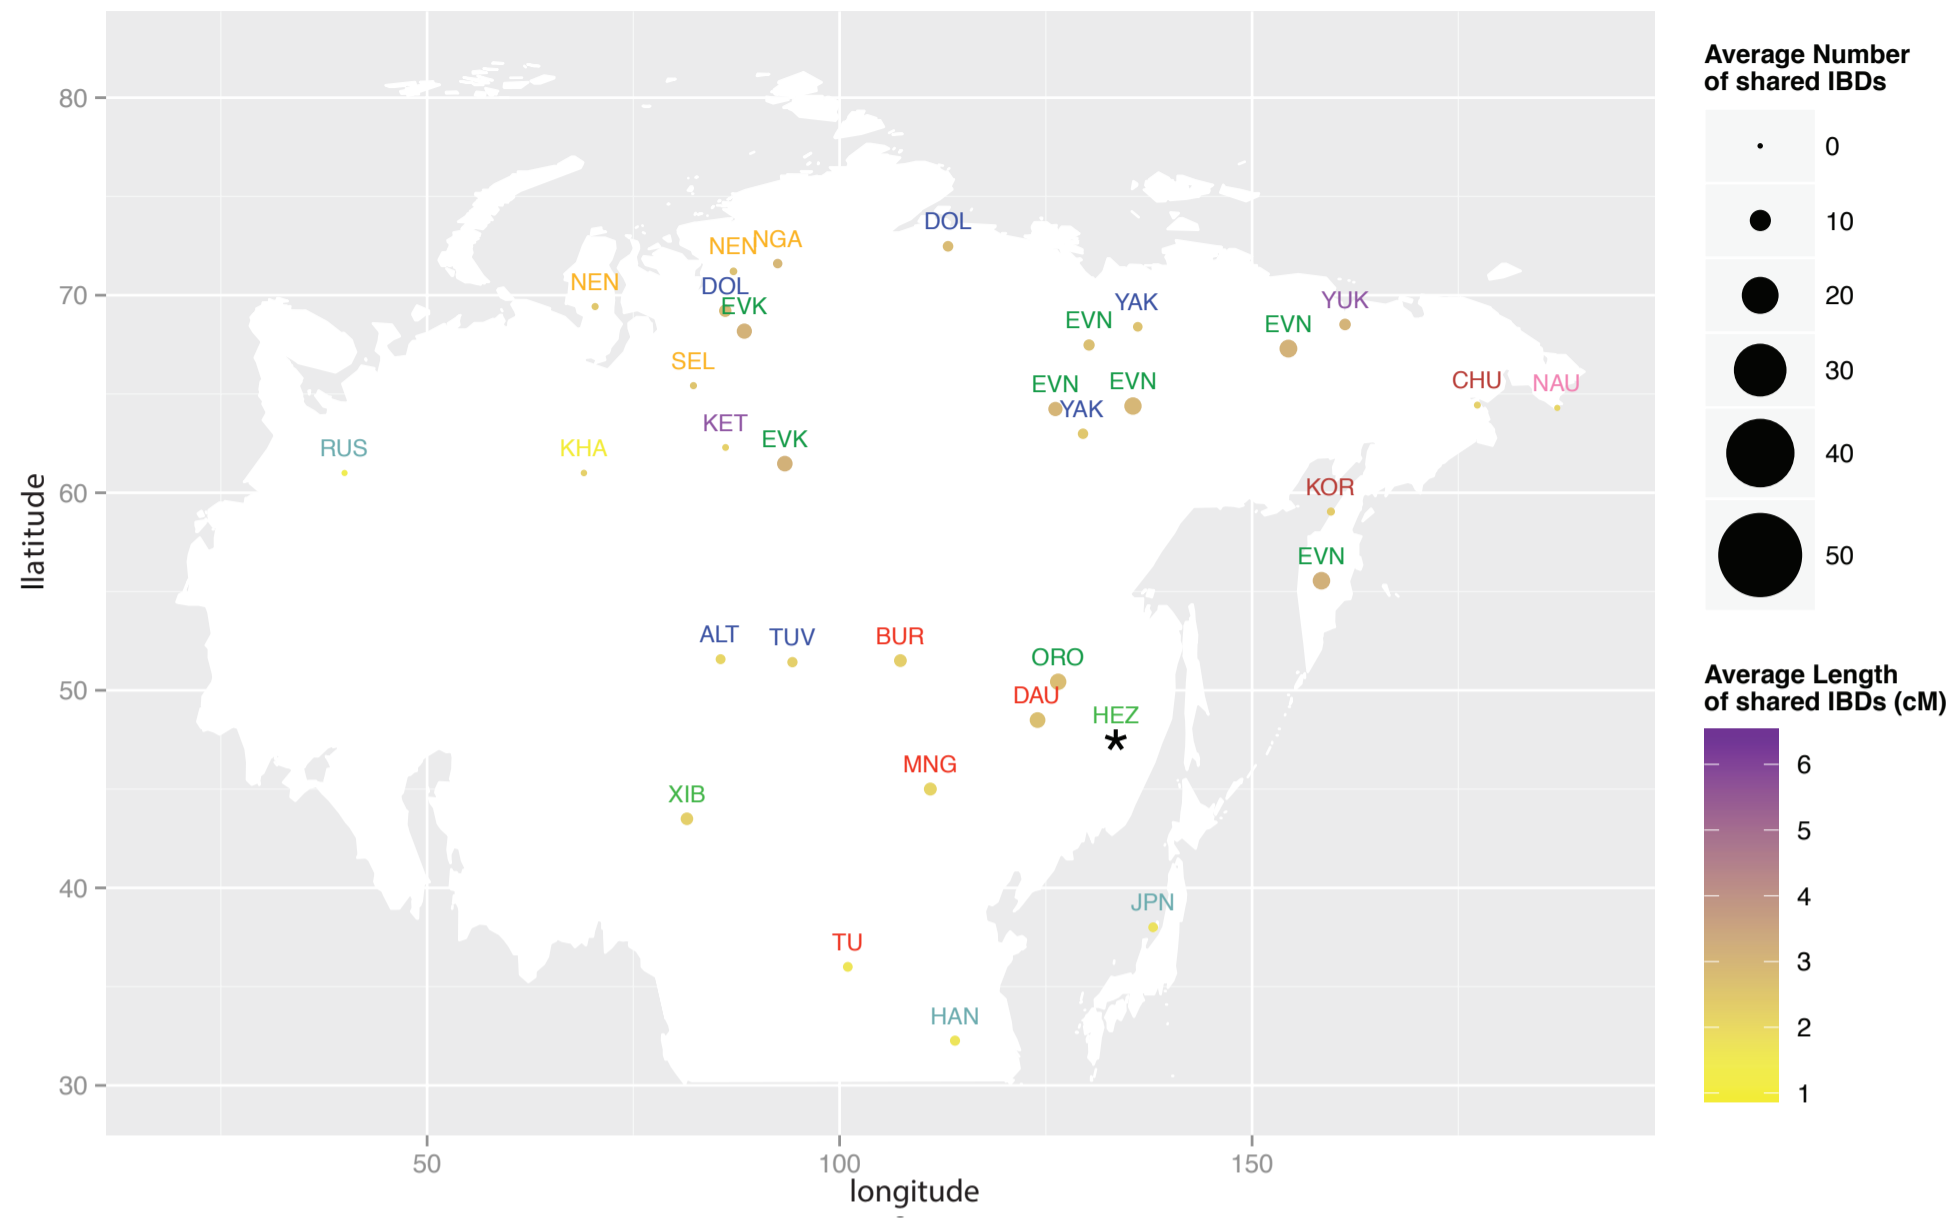

Japanese

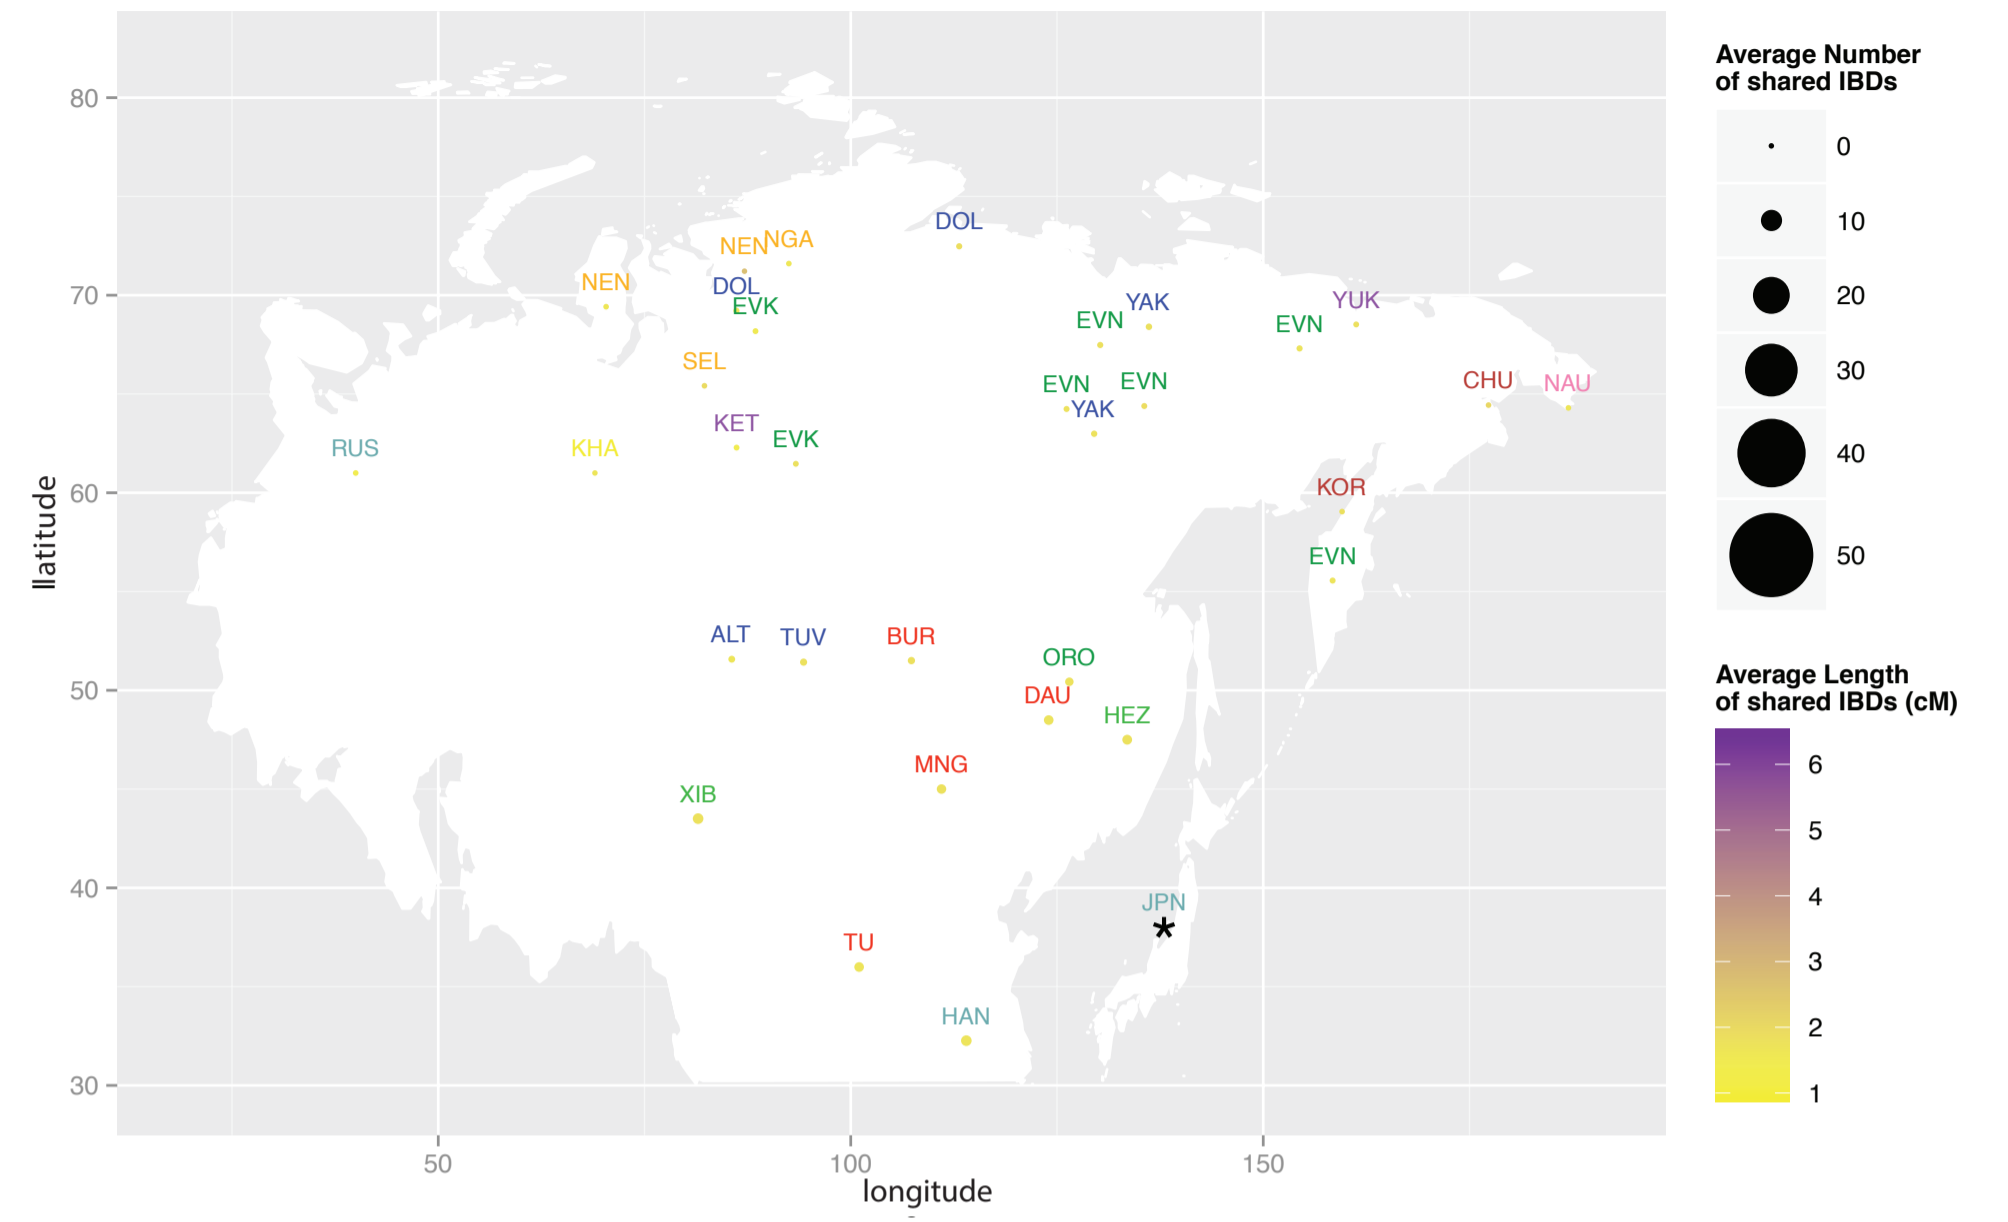

Kets

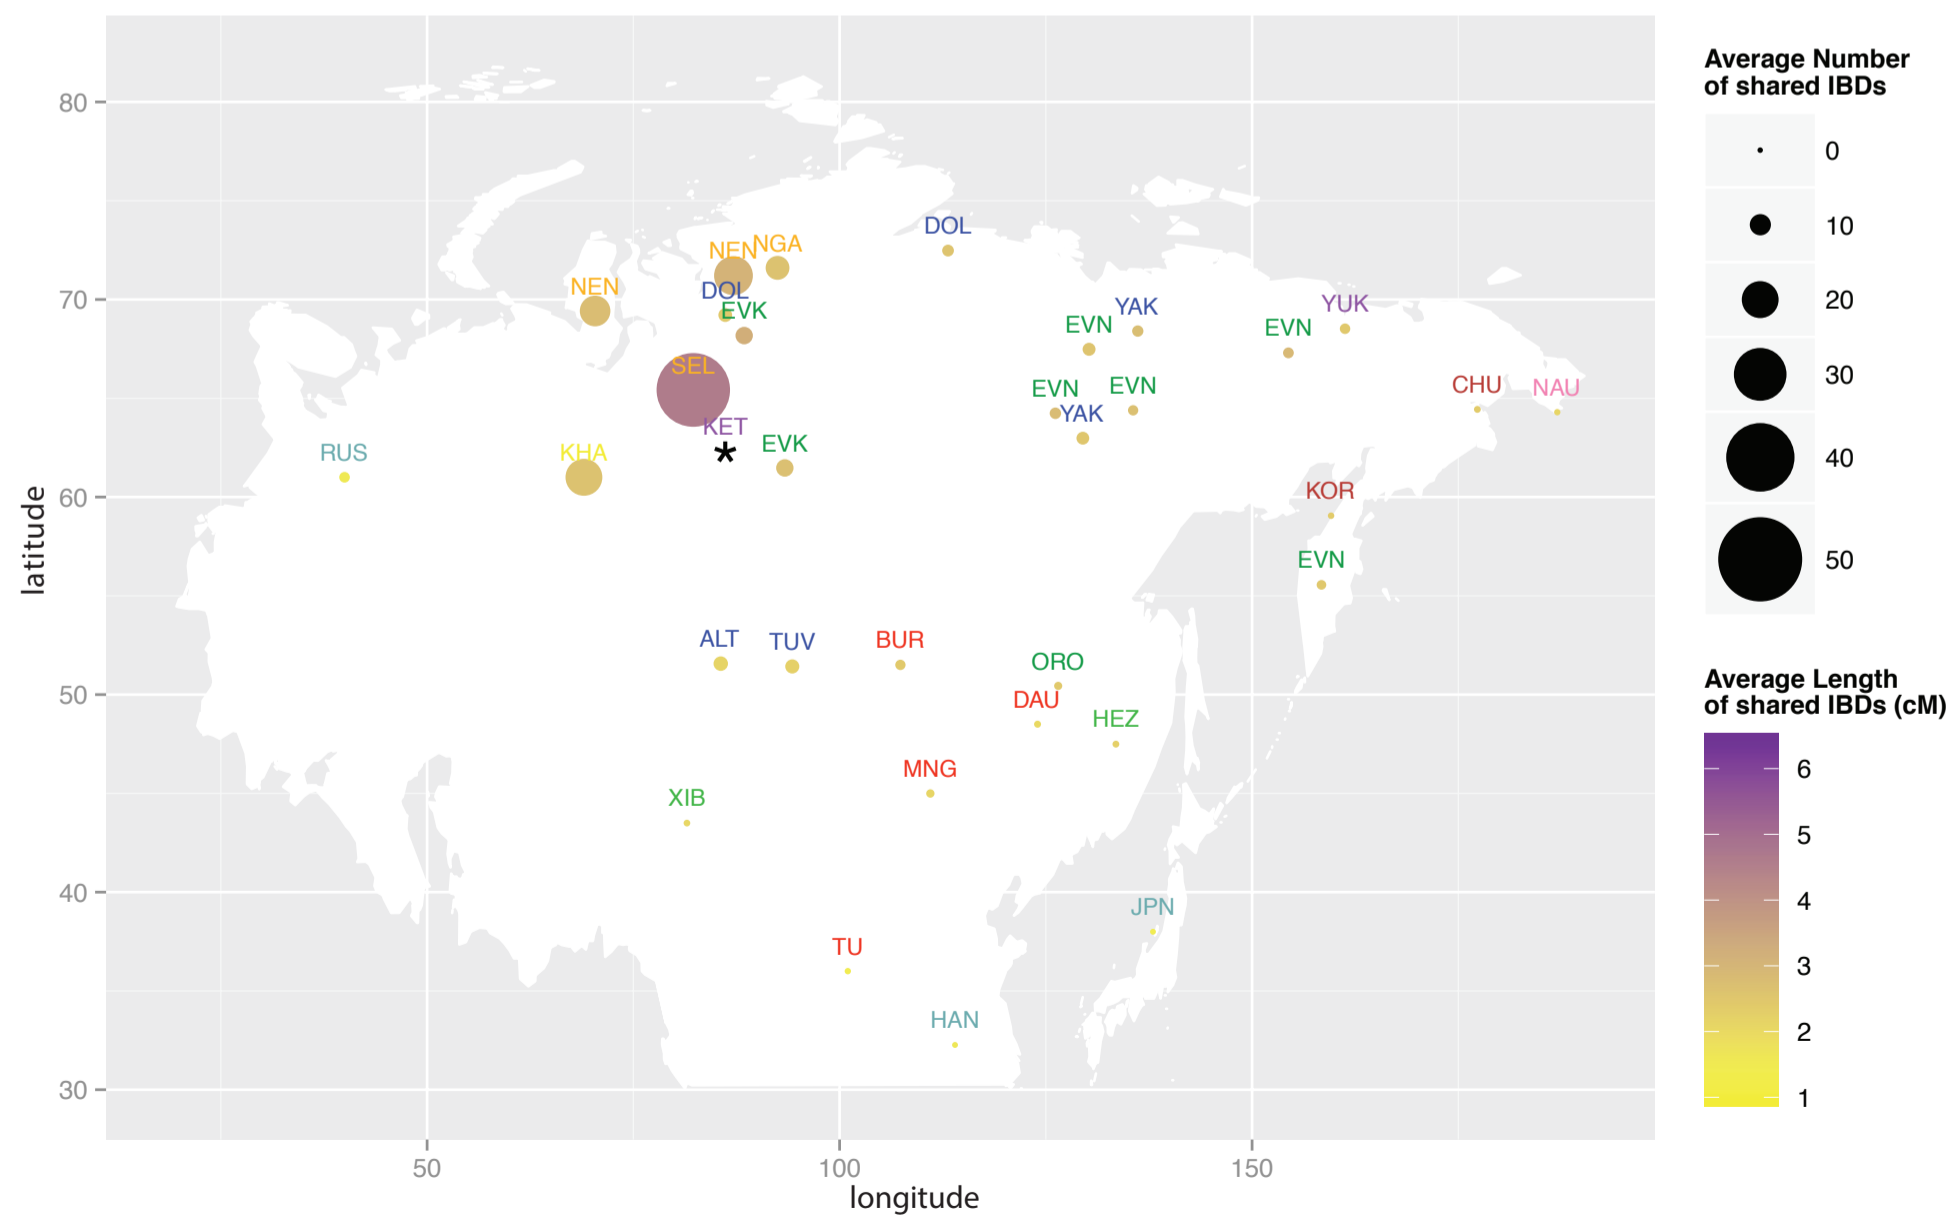

Khanty

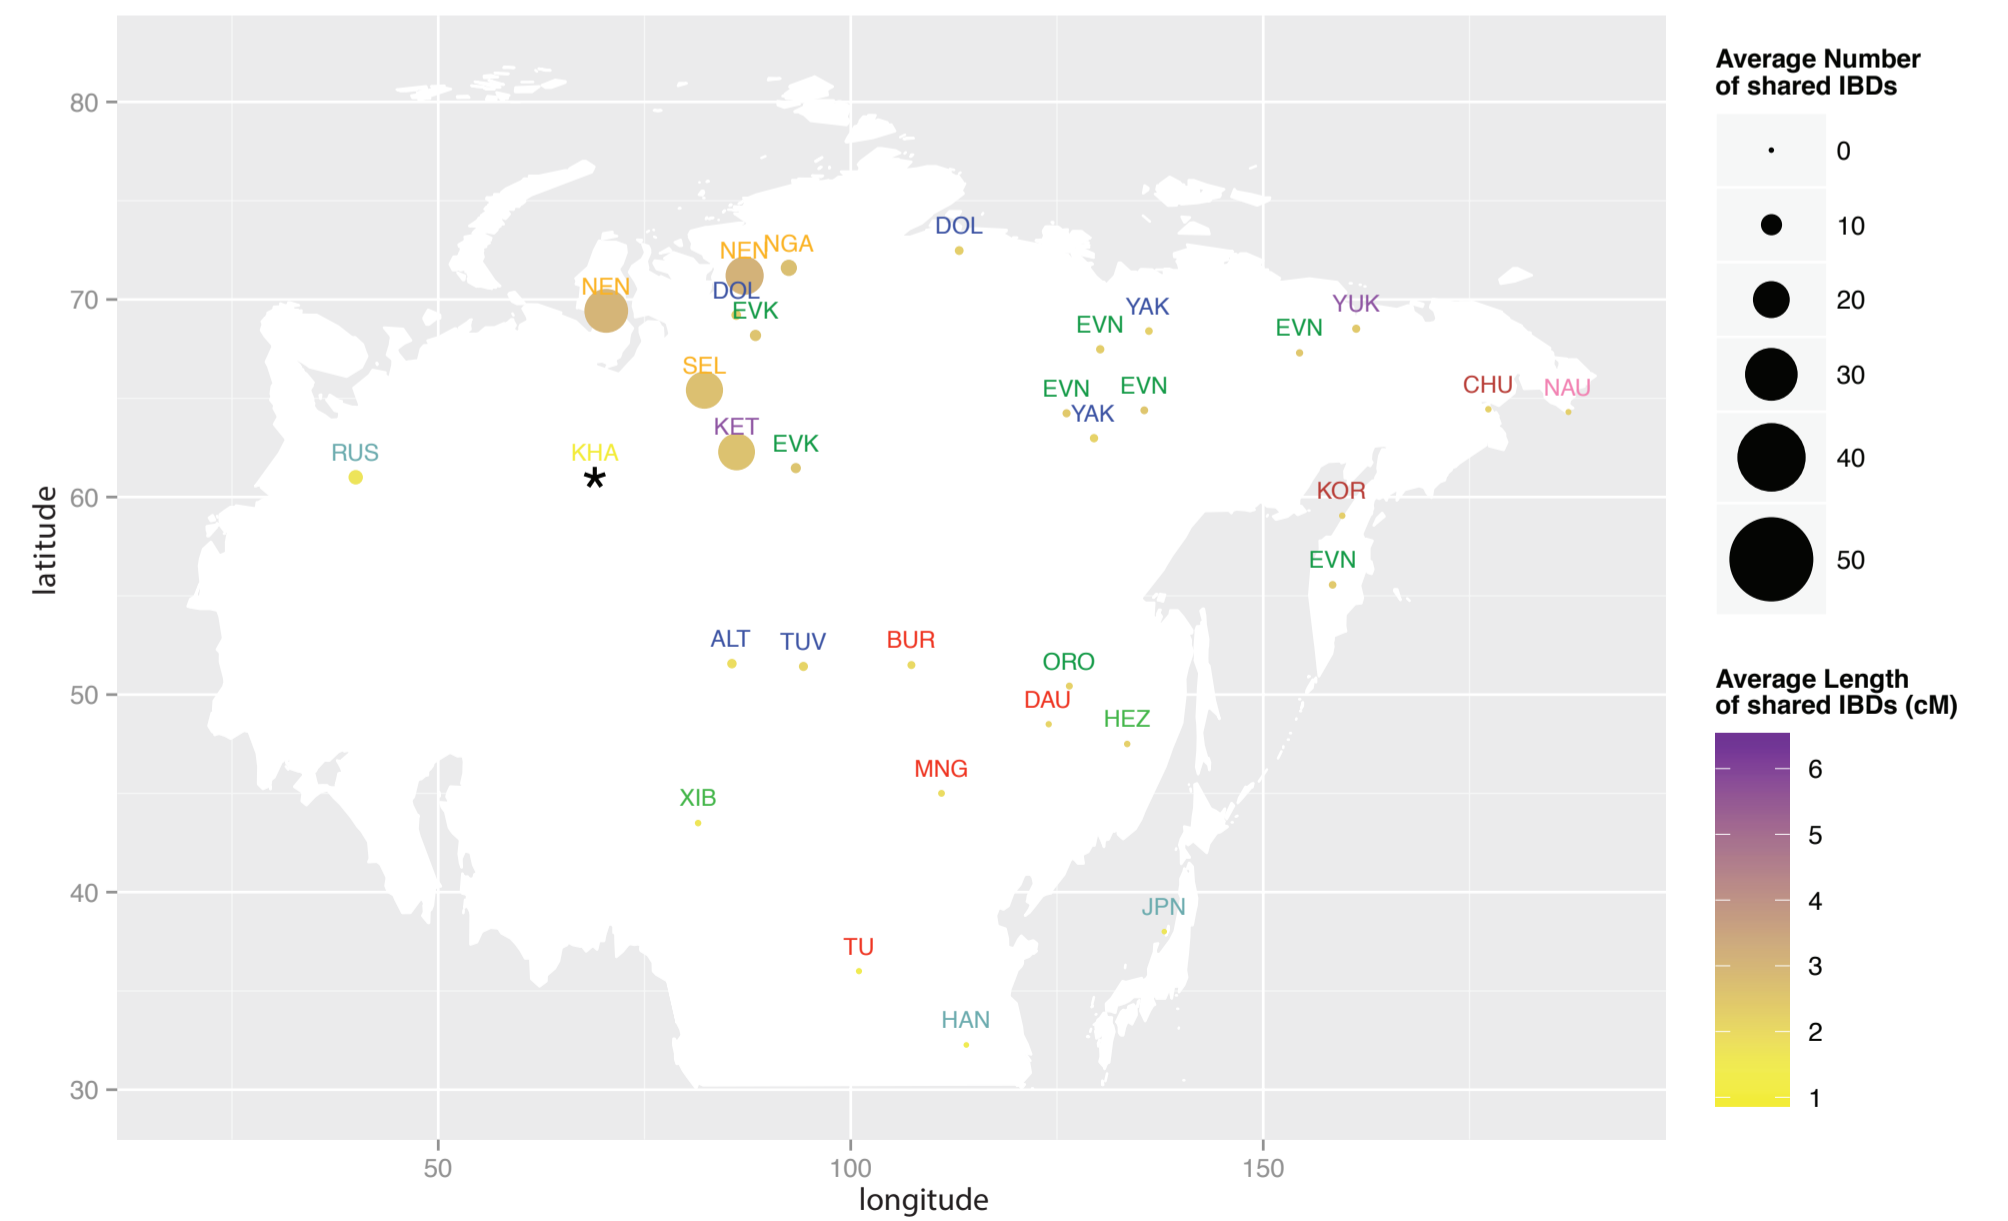

Koryaks

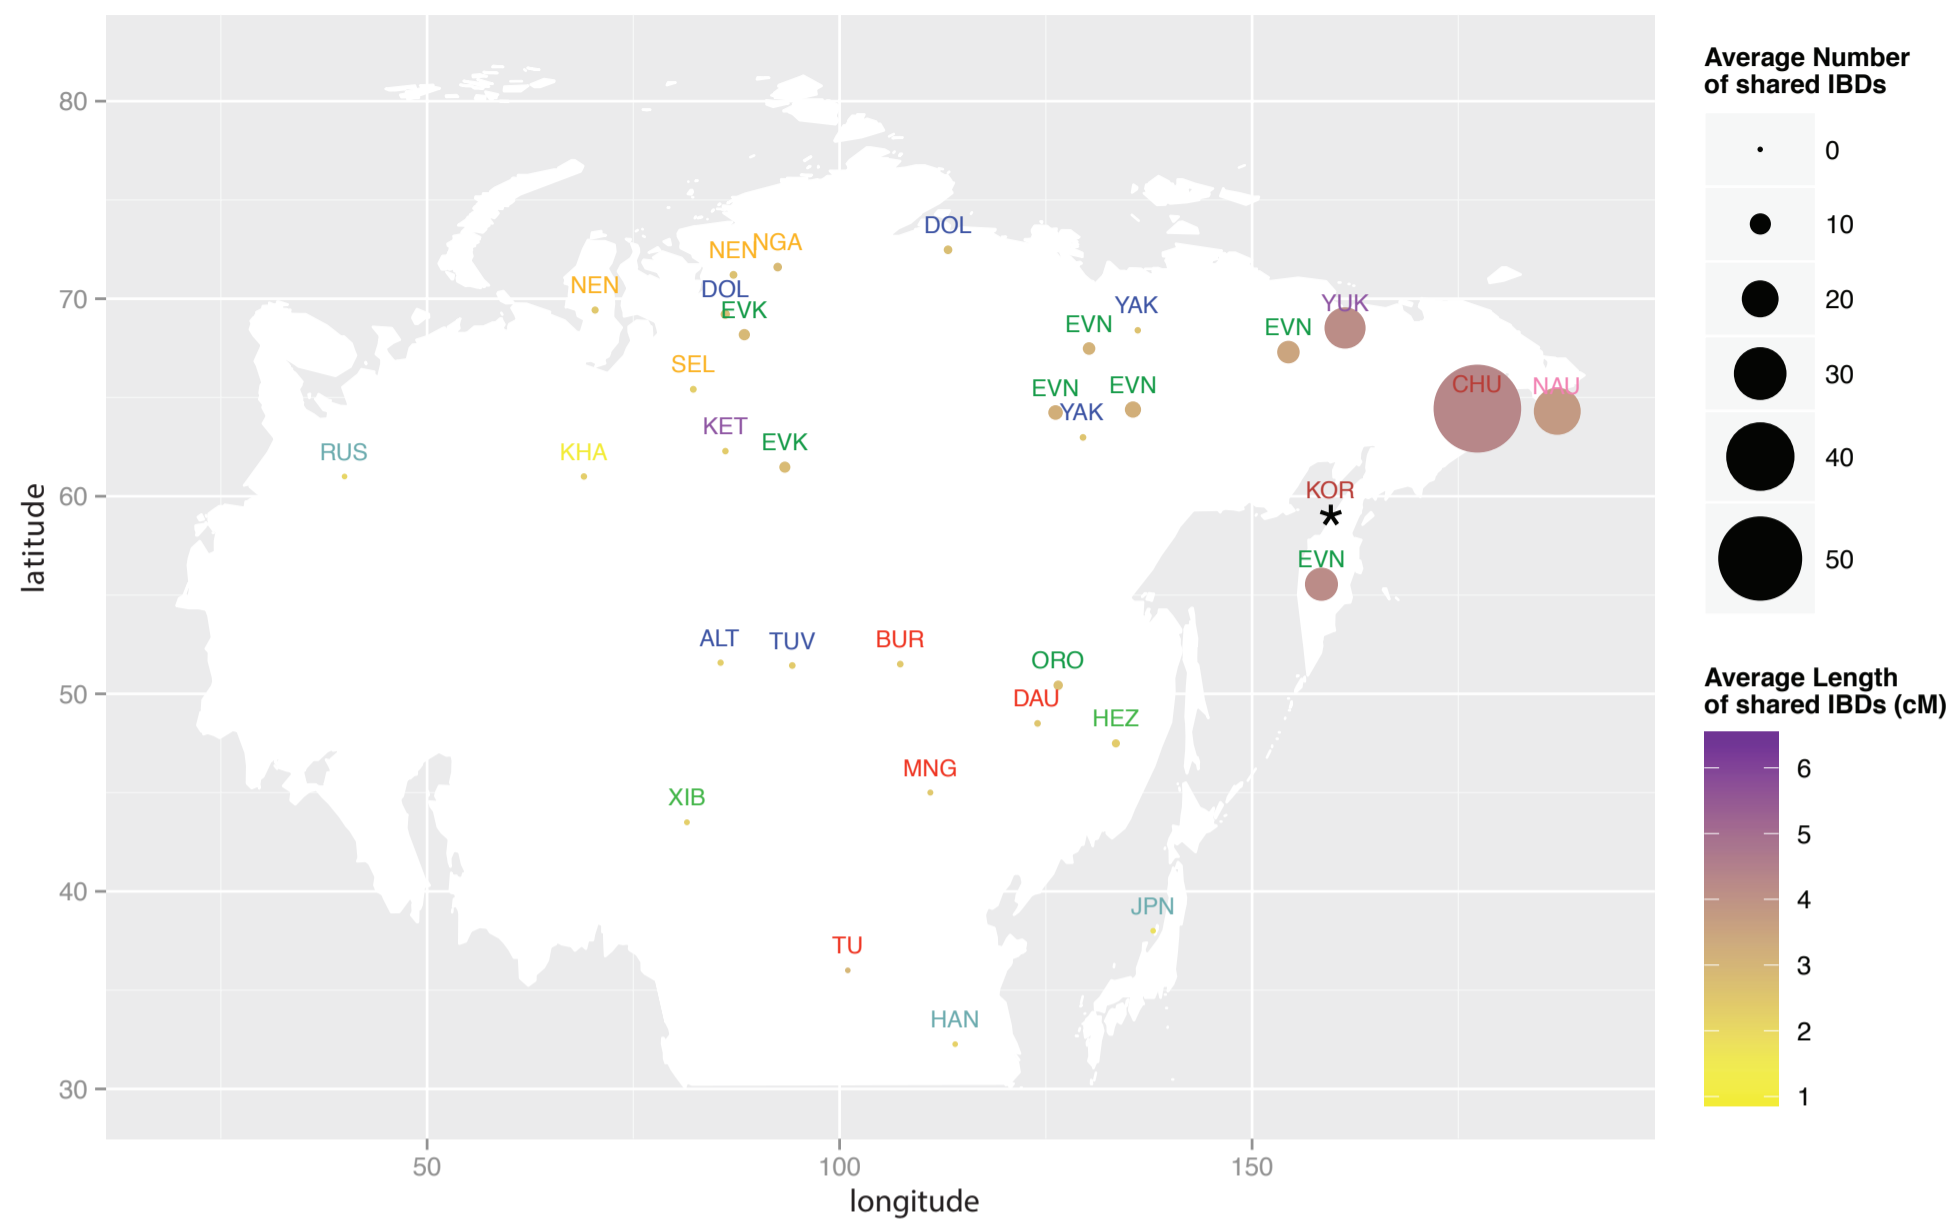

Mongolians

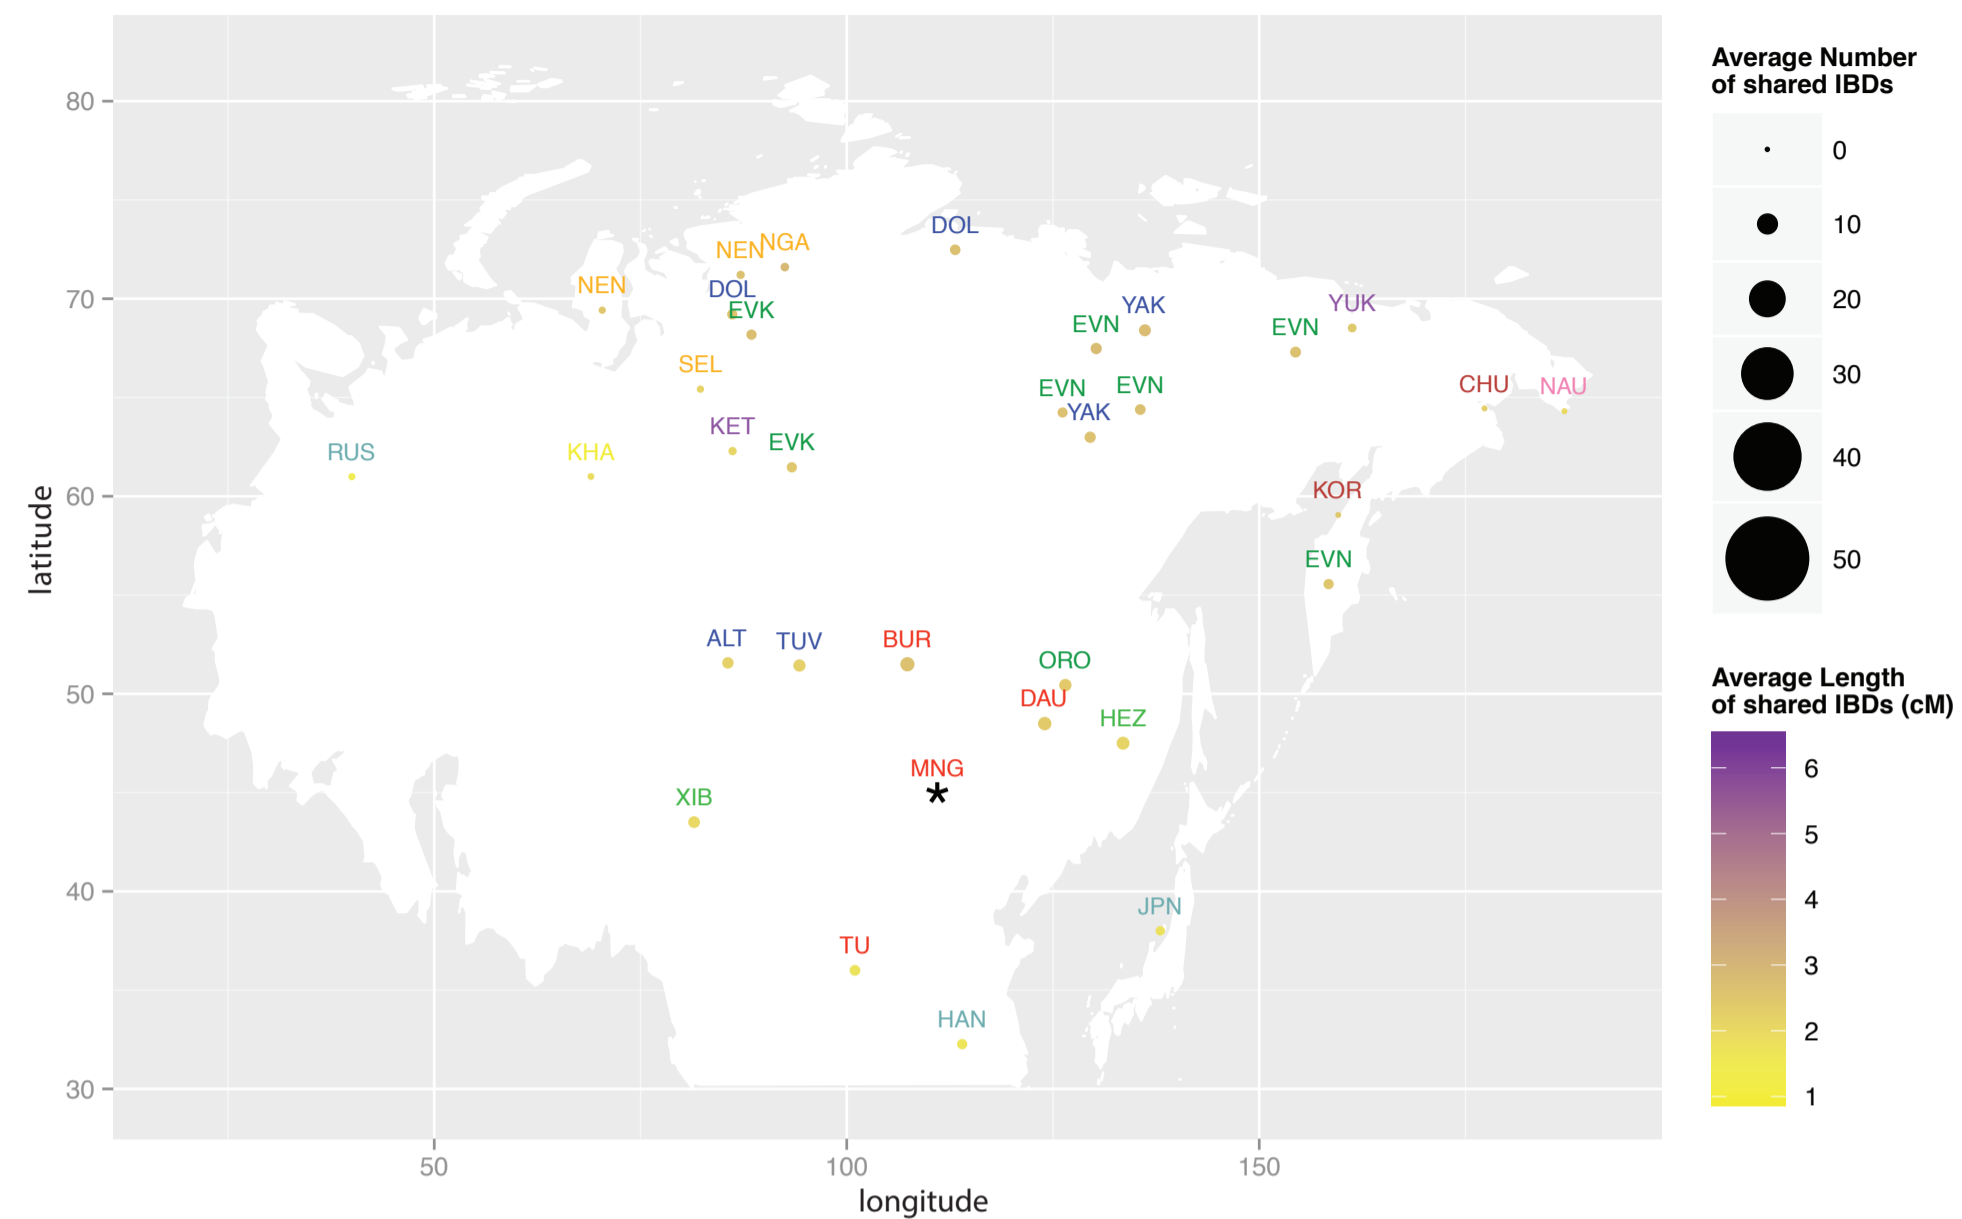

Naukan

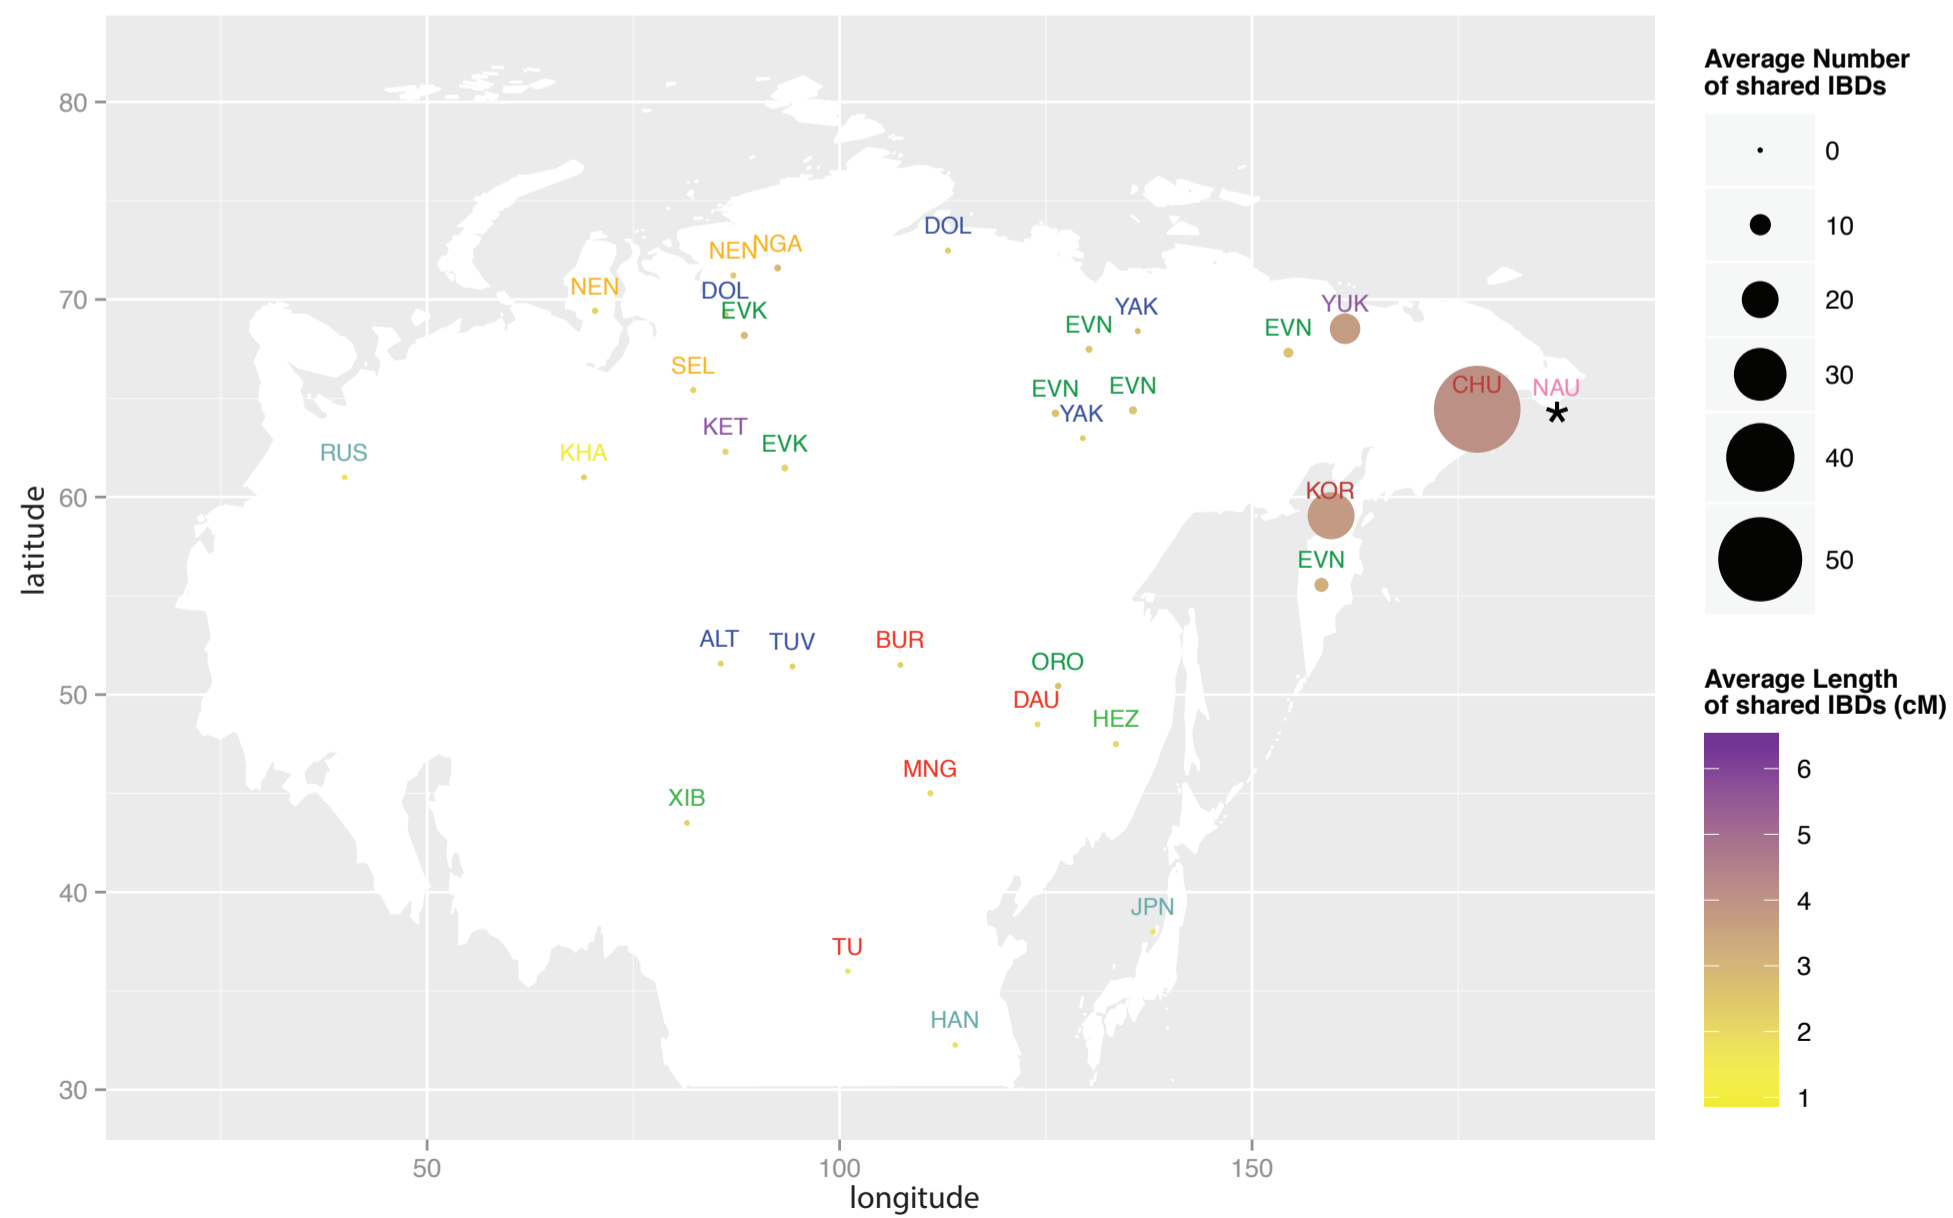

Nenets Taimyr

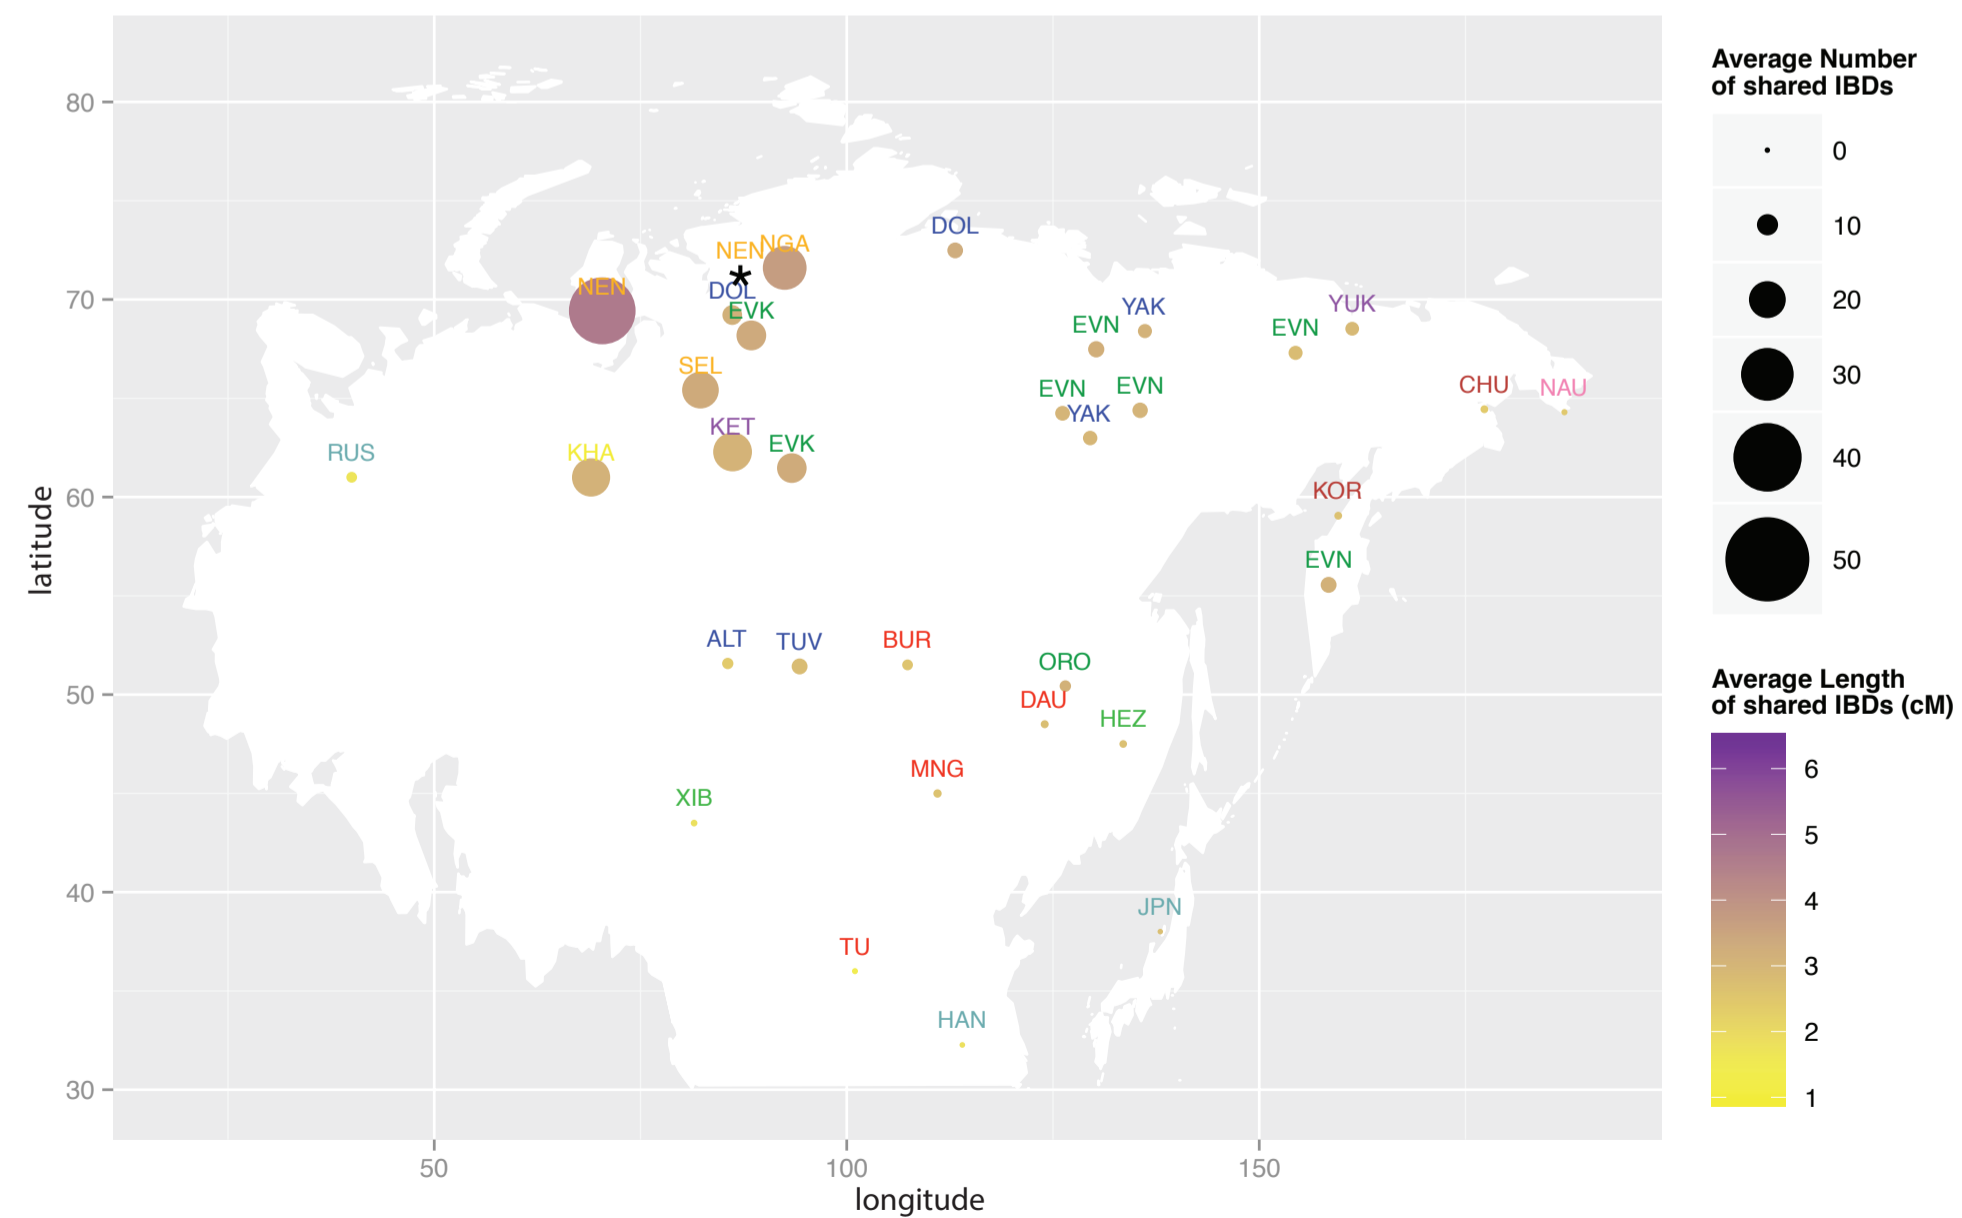



Nenets Yamal

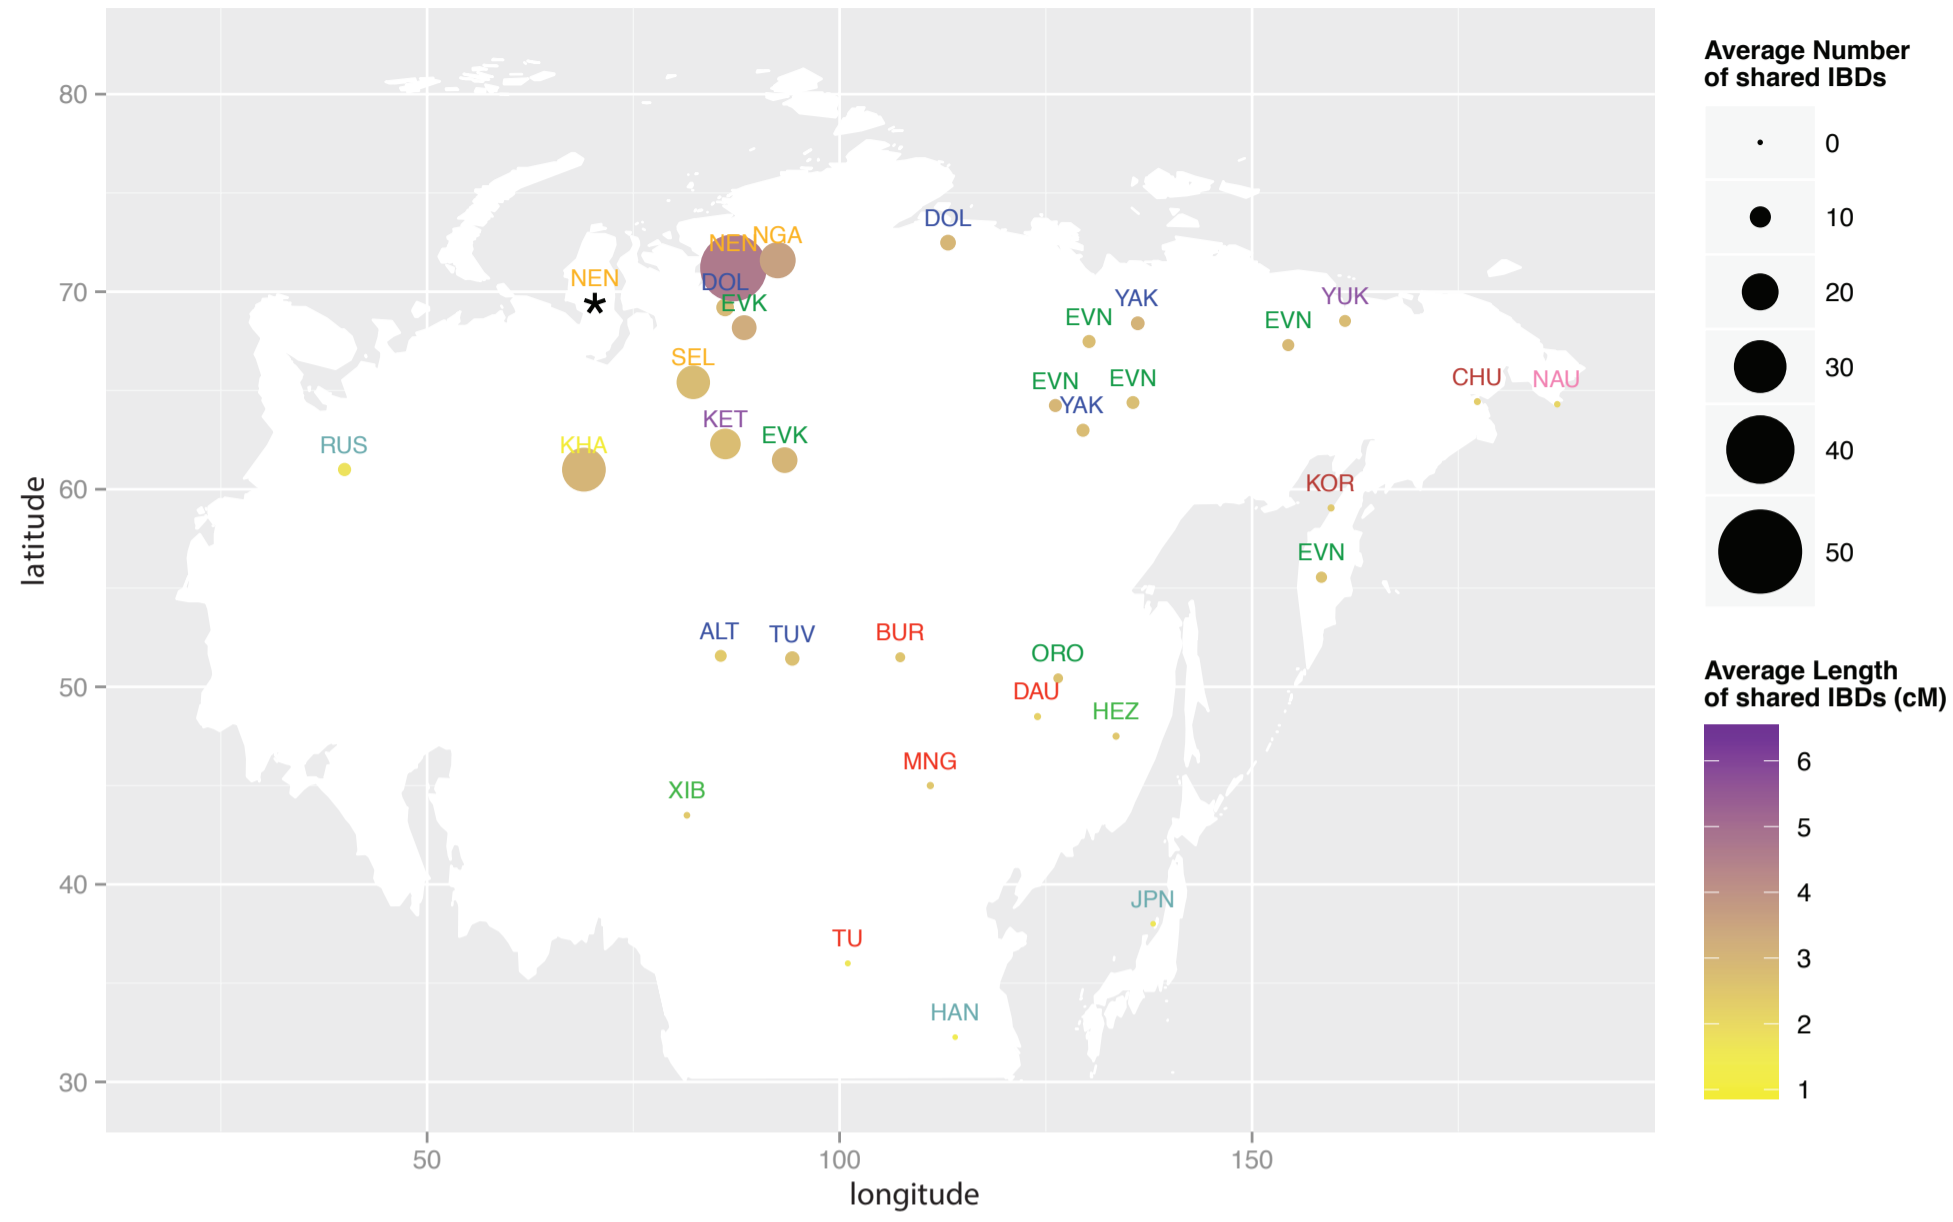

Nganasan

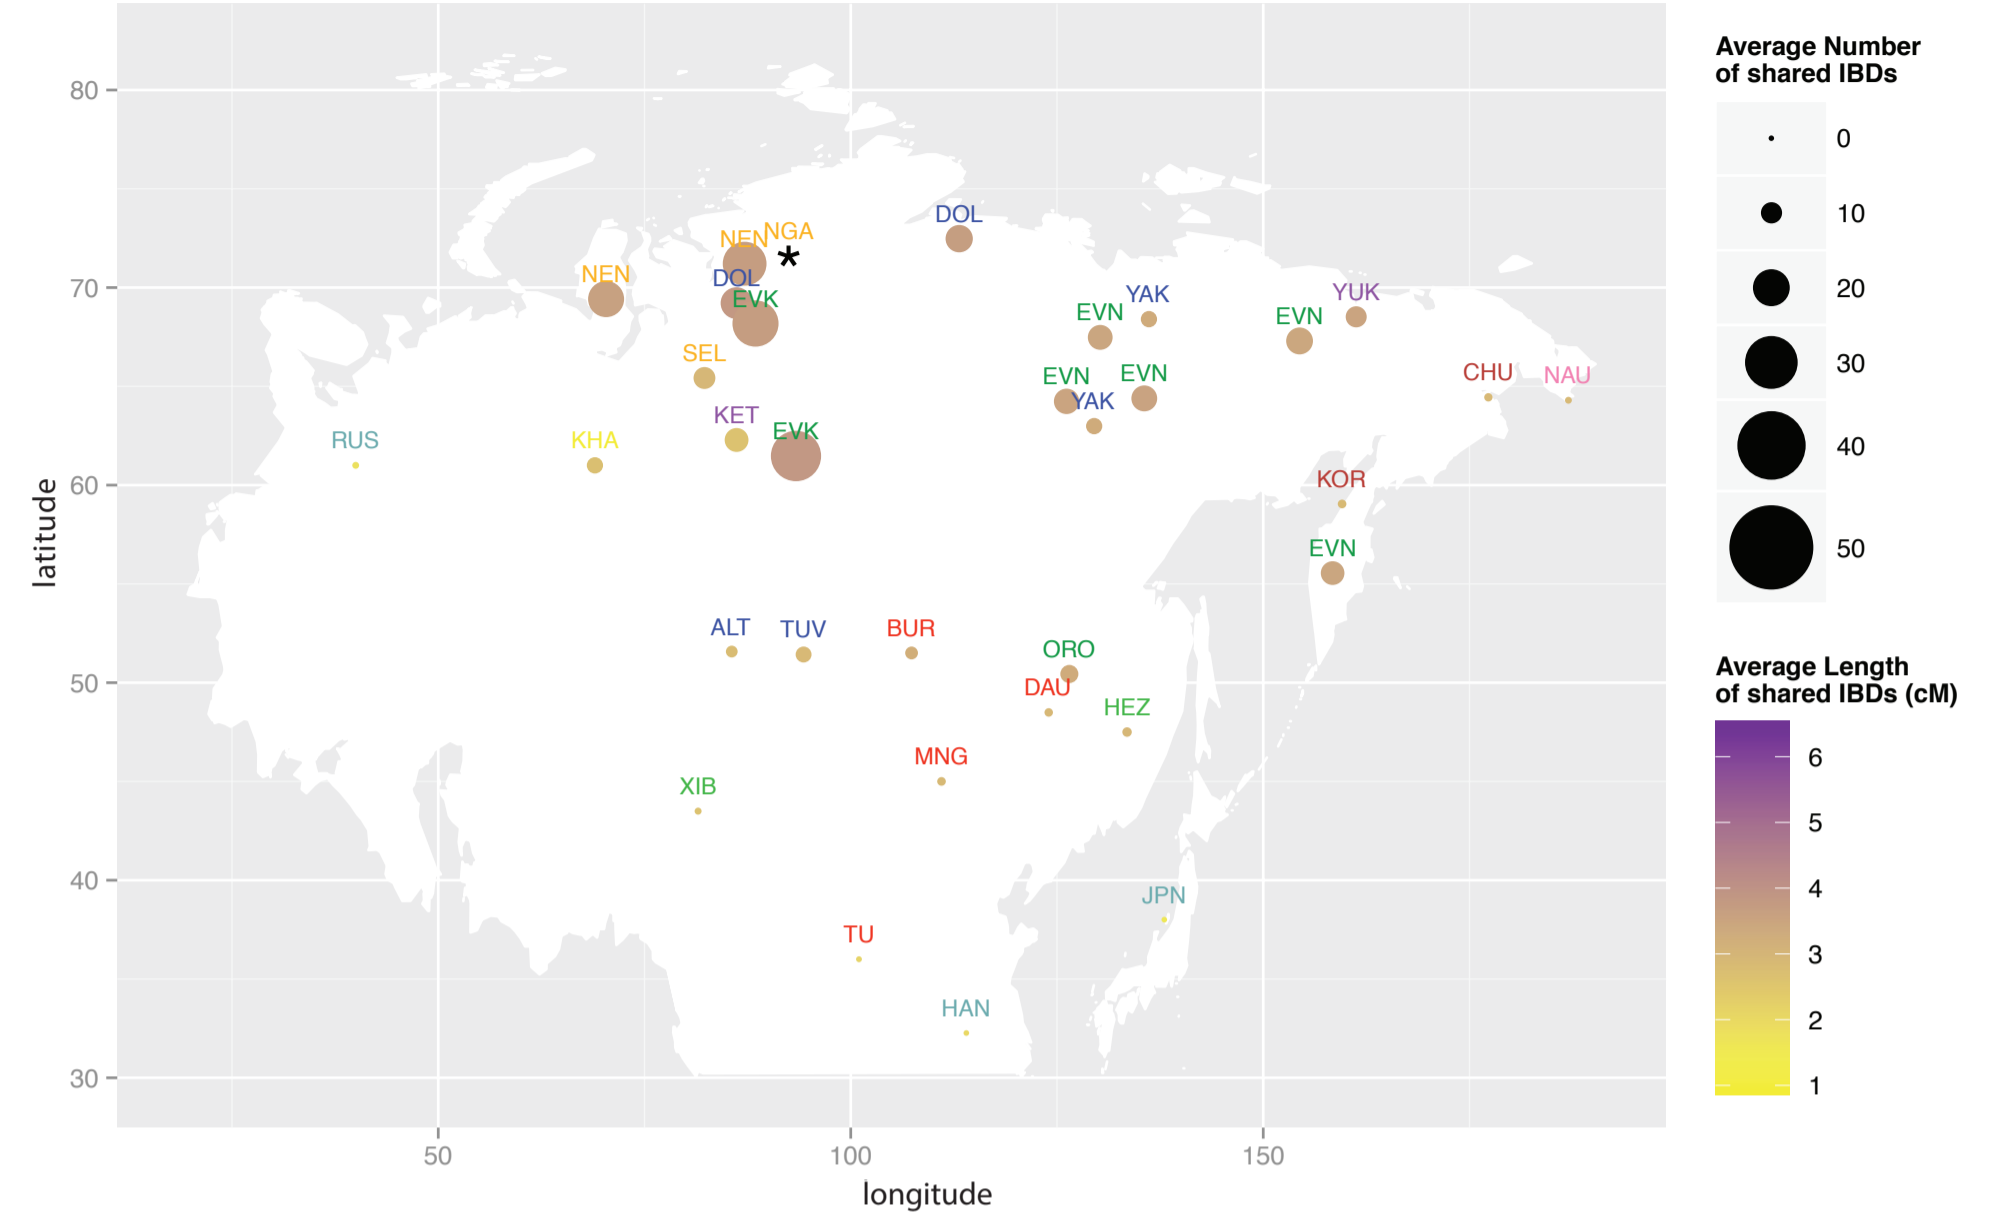

Oroqen

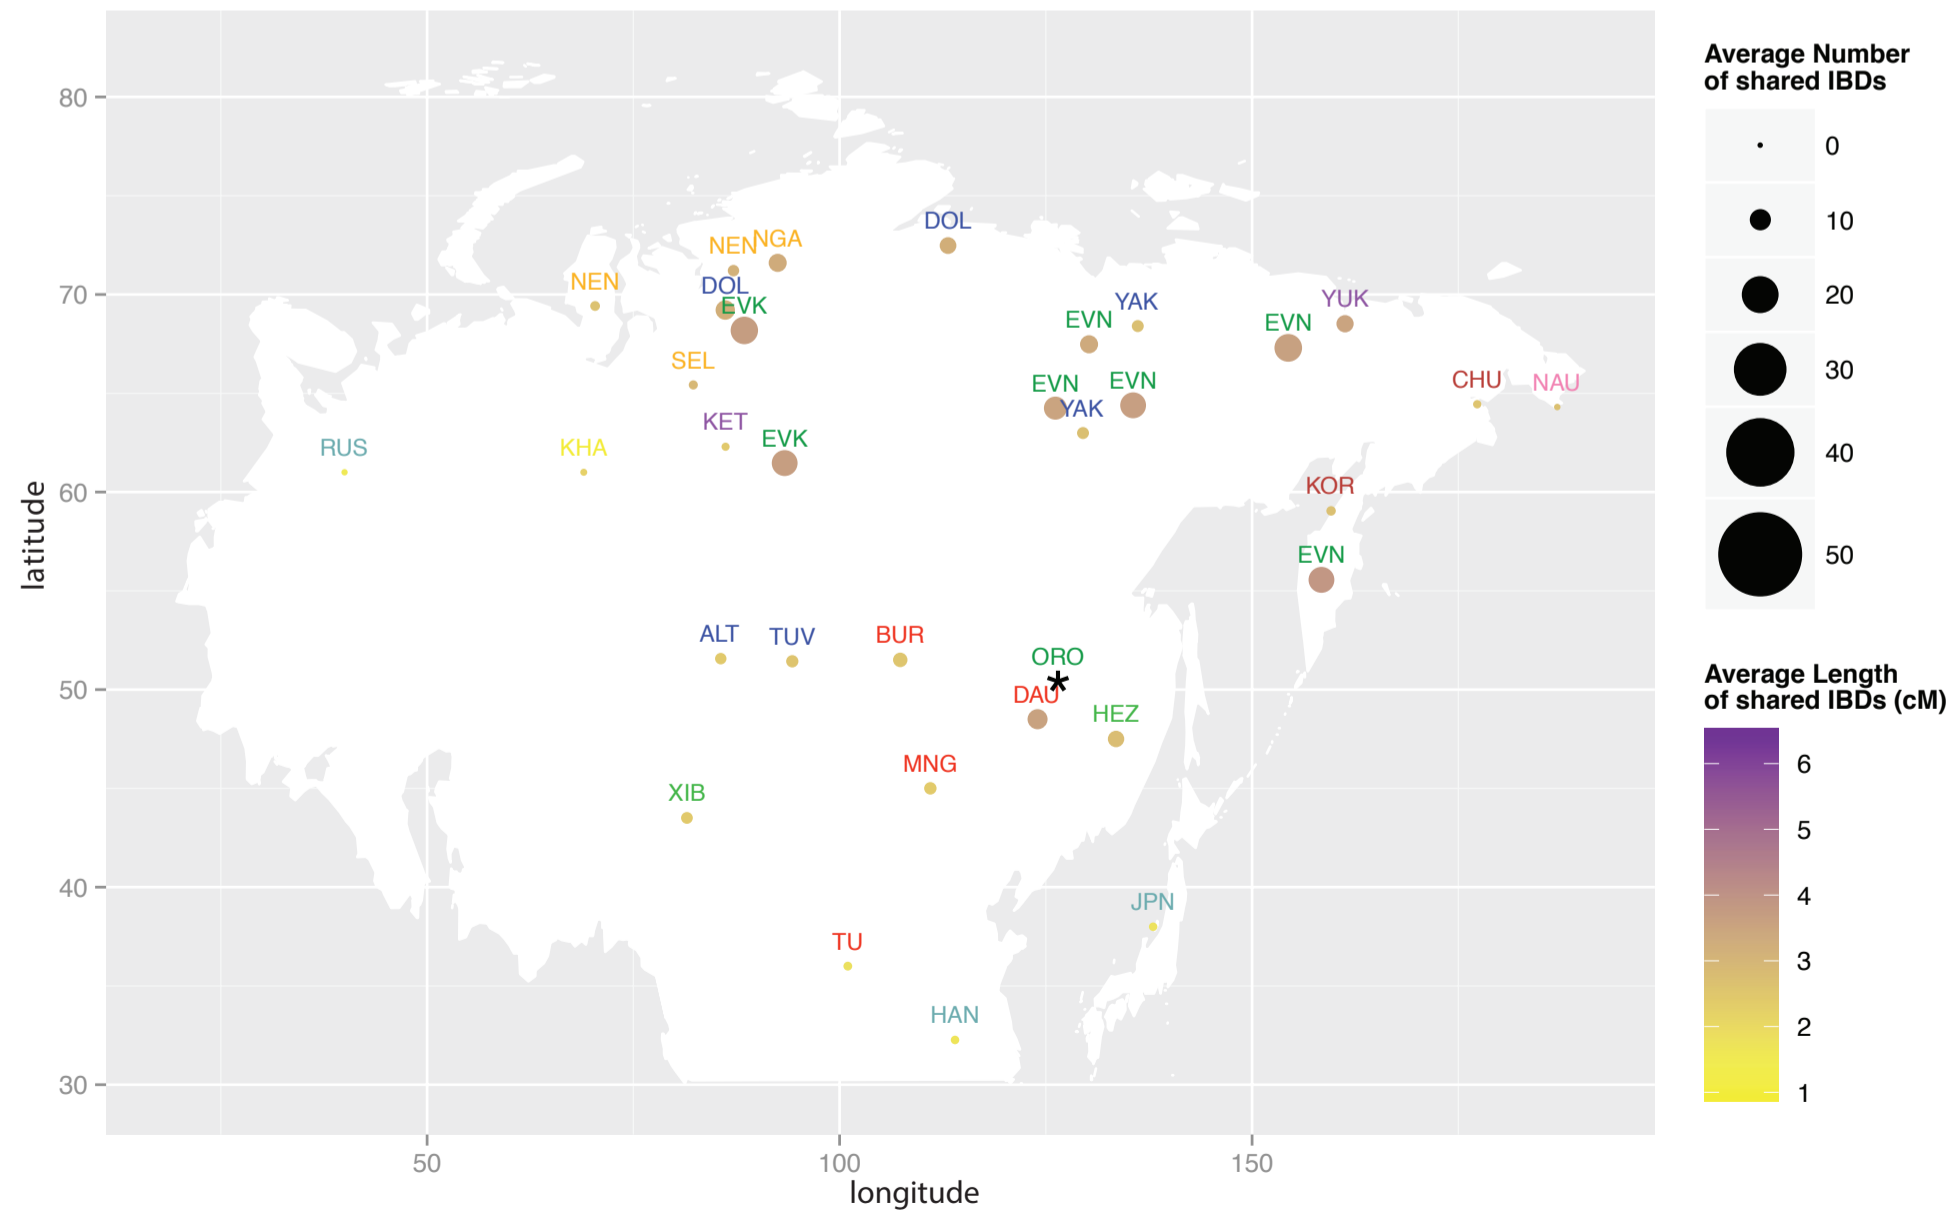

Russian

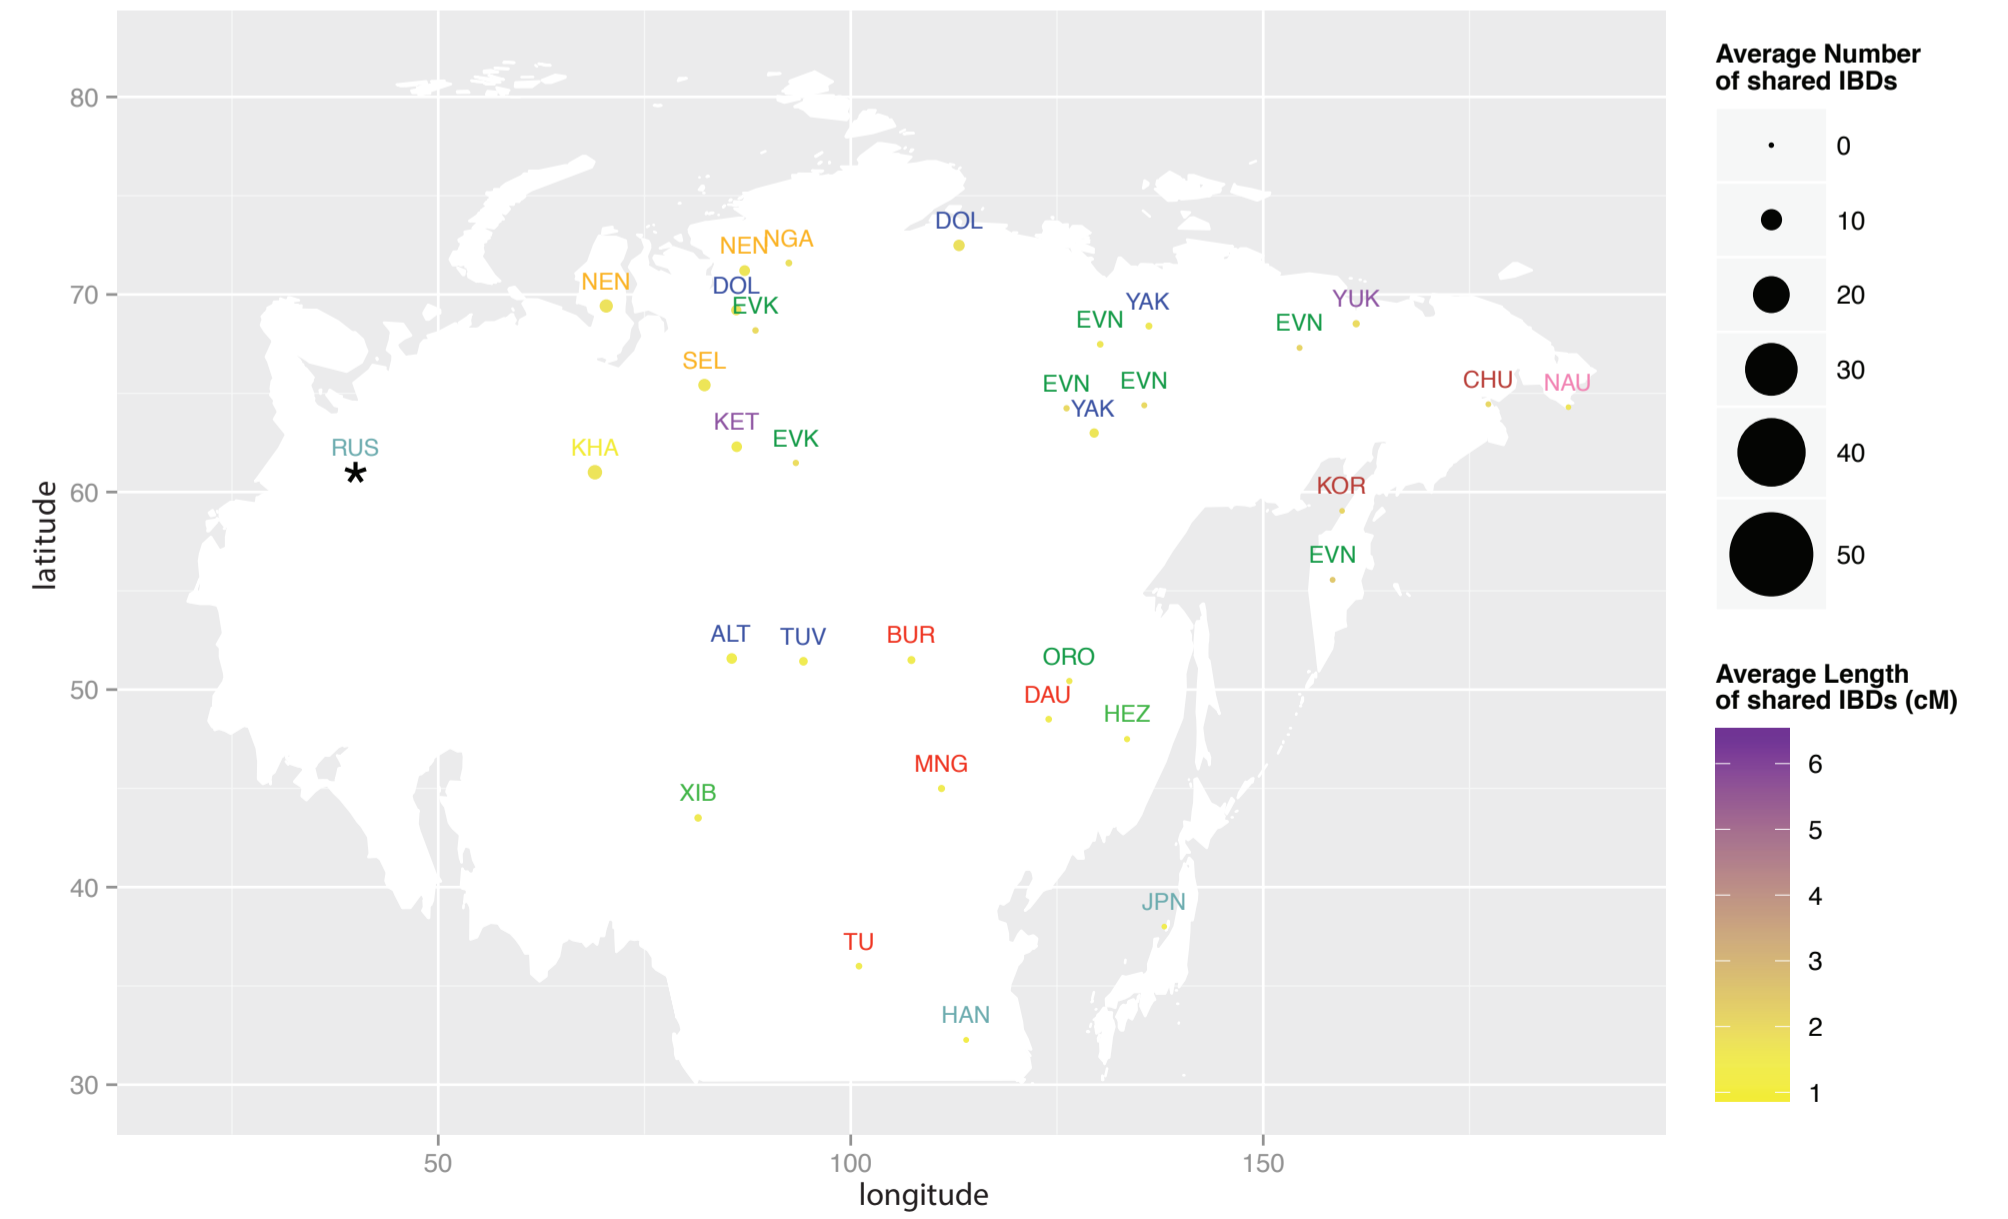

Selkup

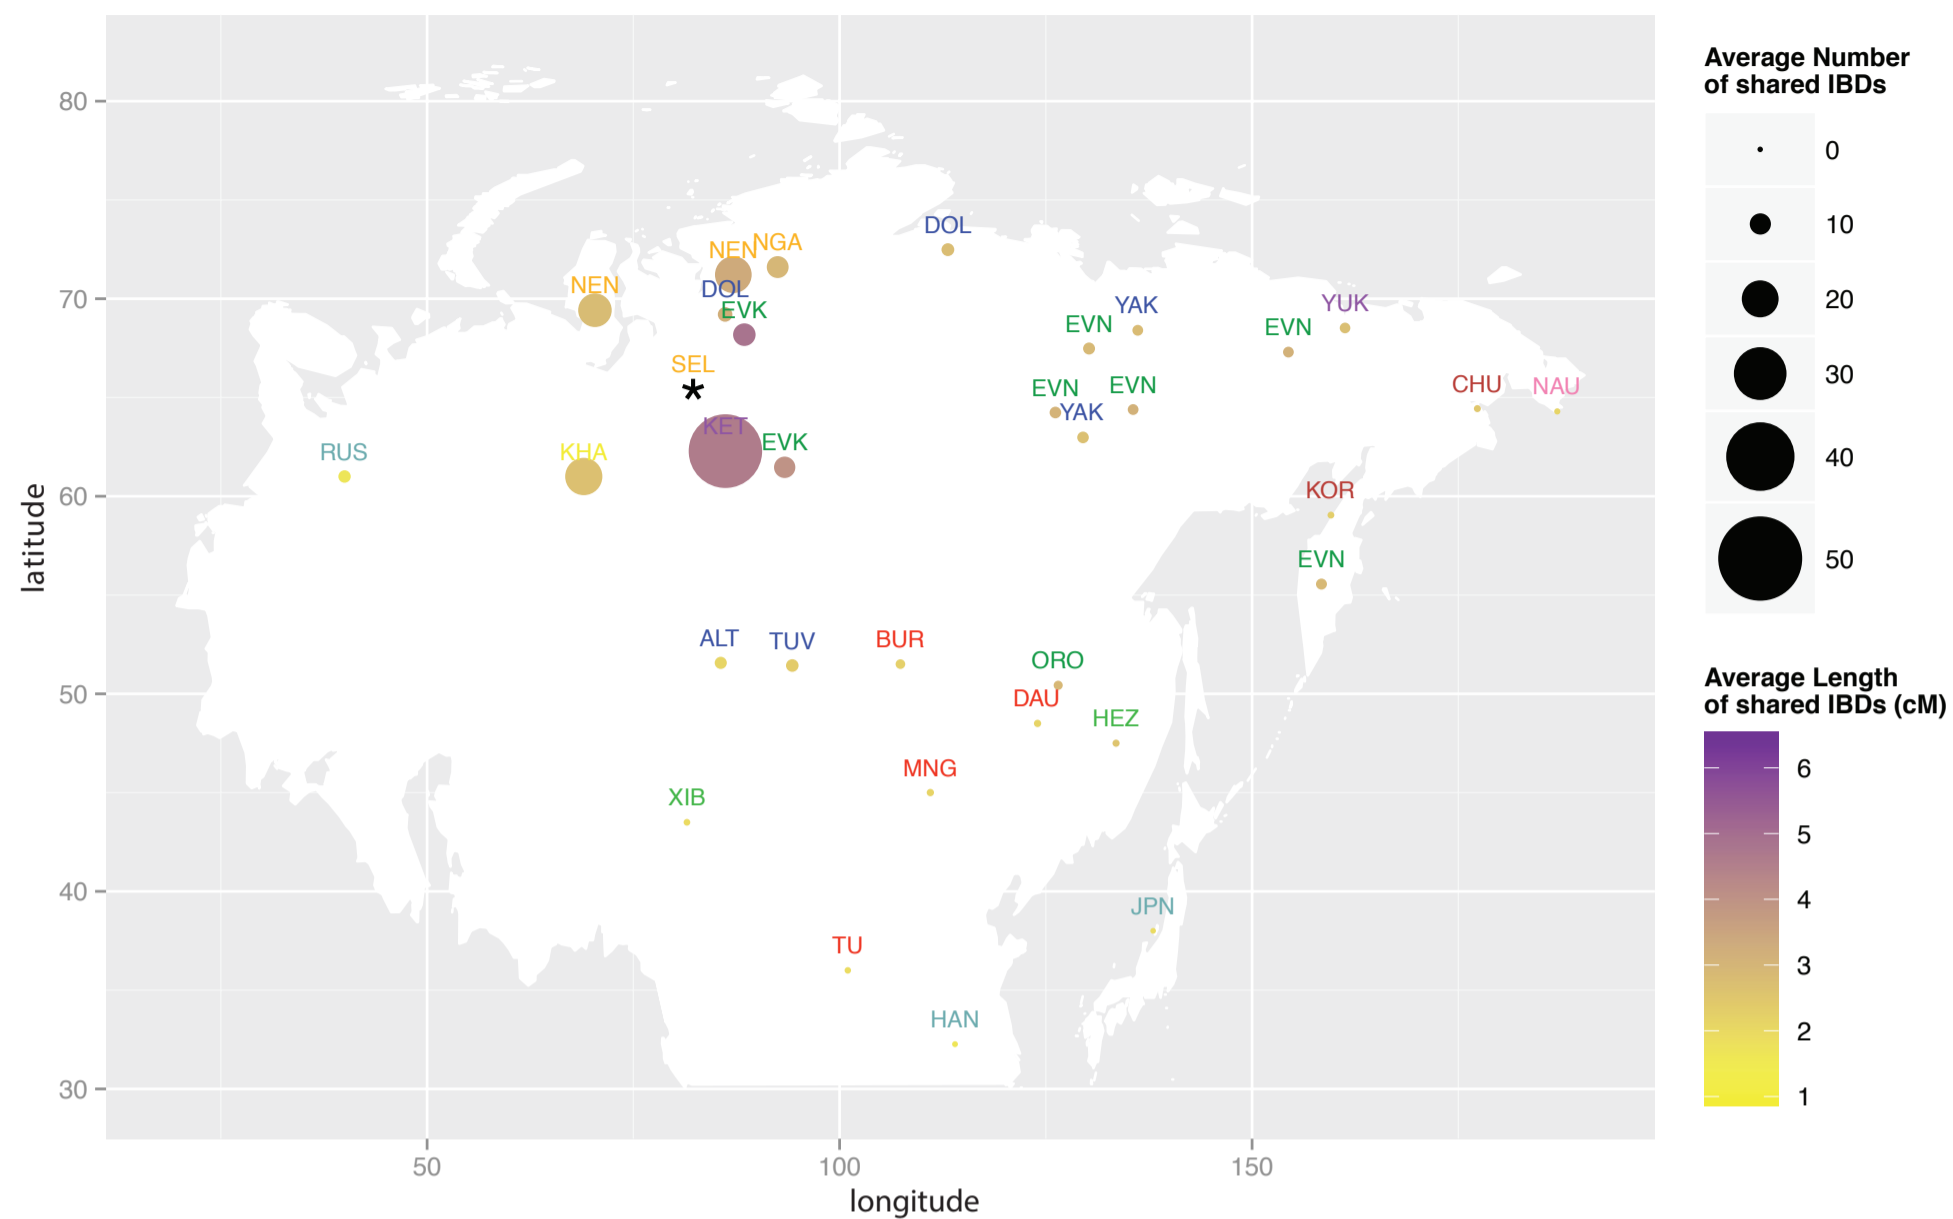

Tu Mongolian

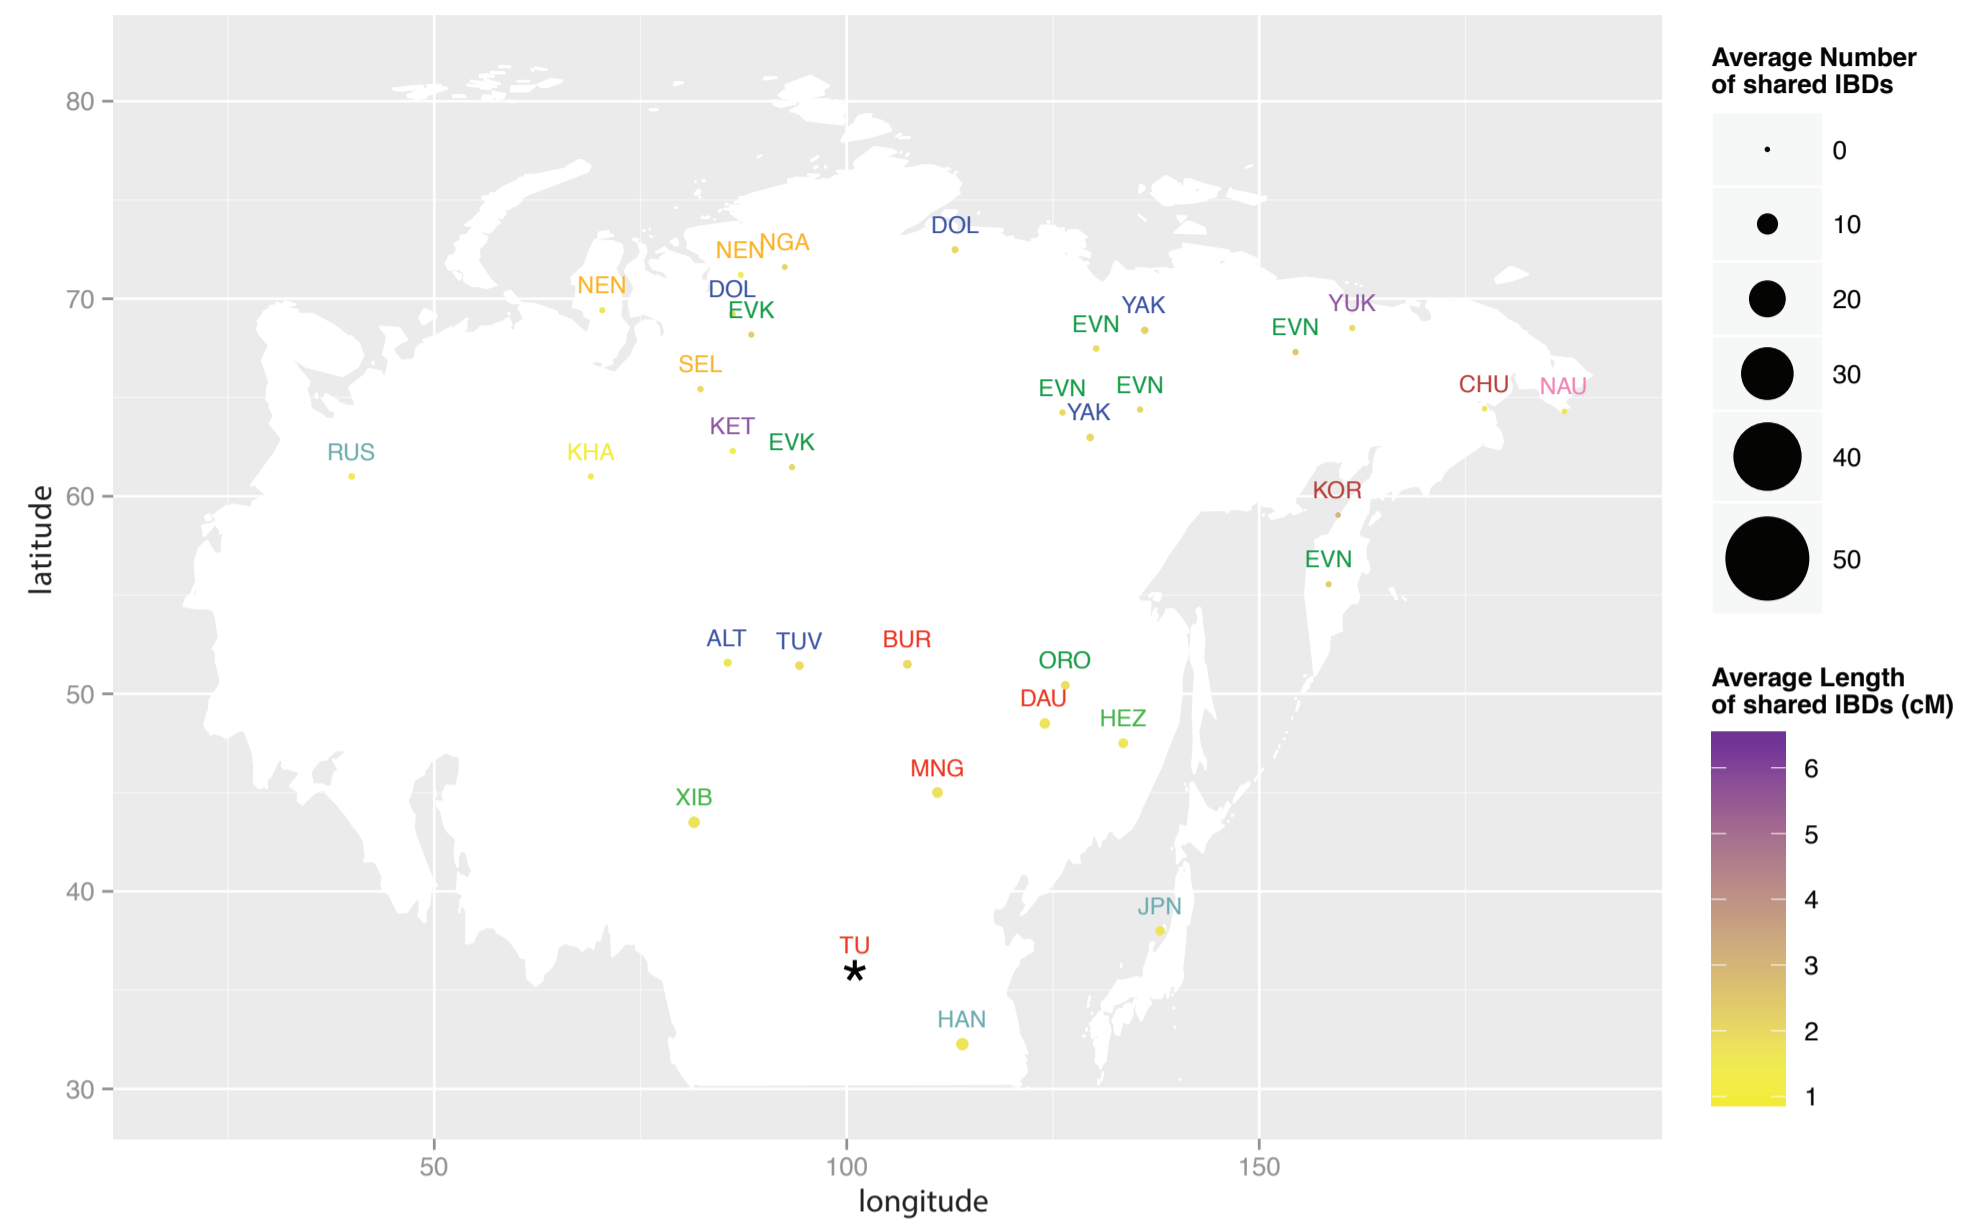

Xibo

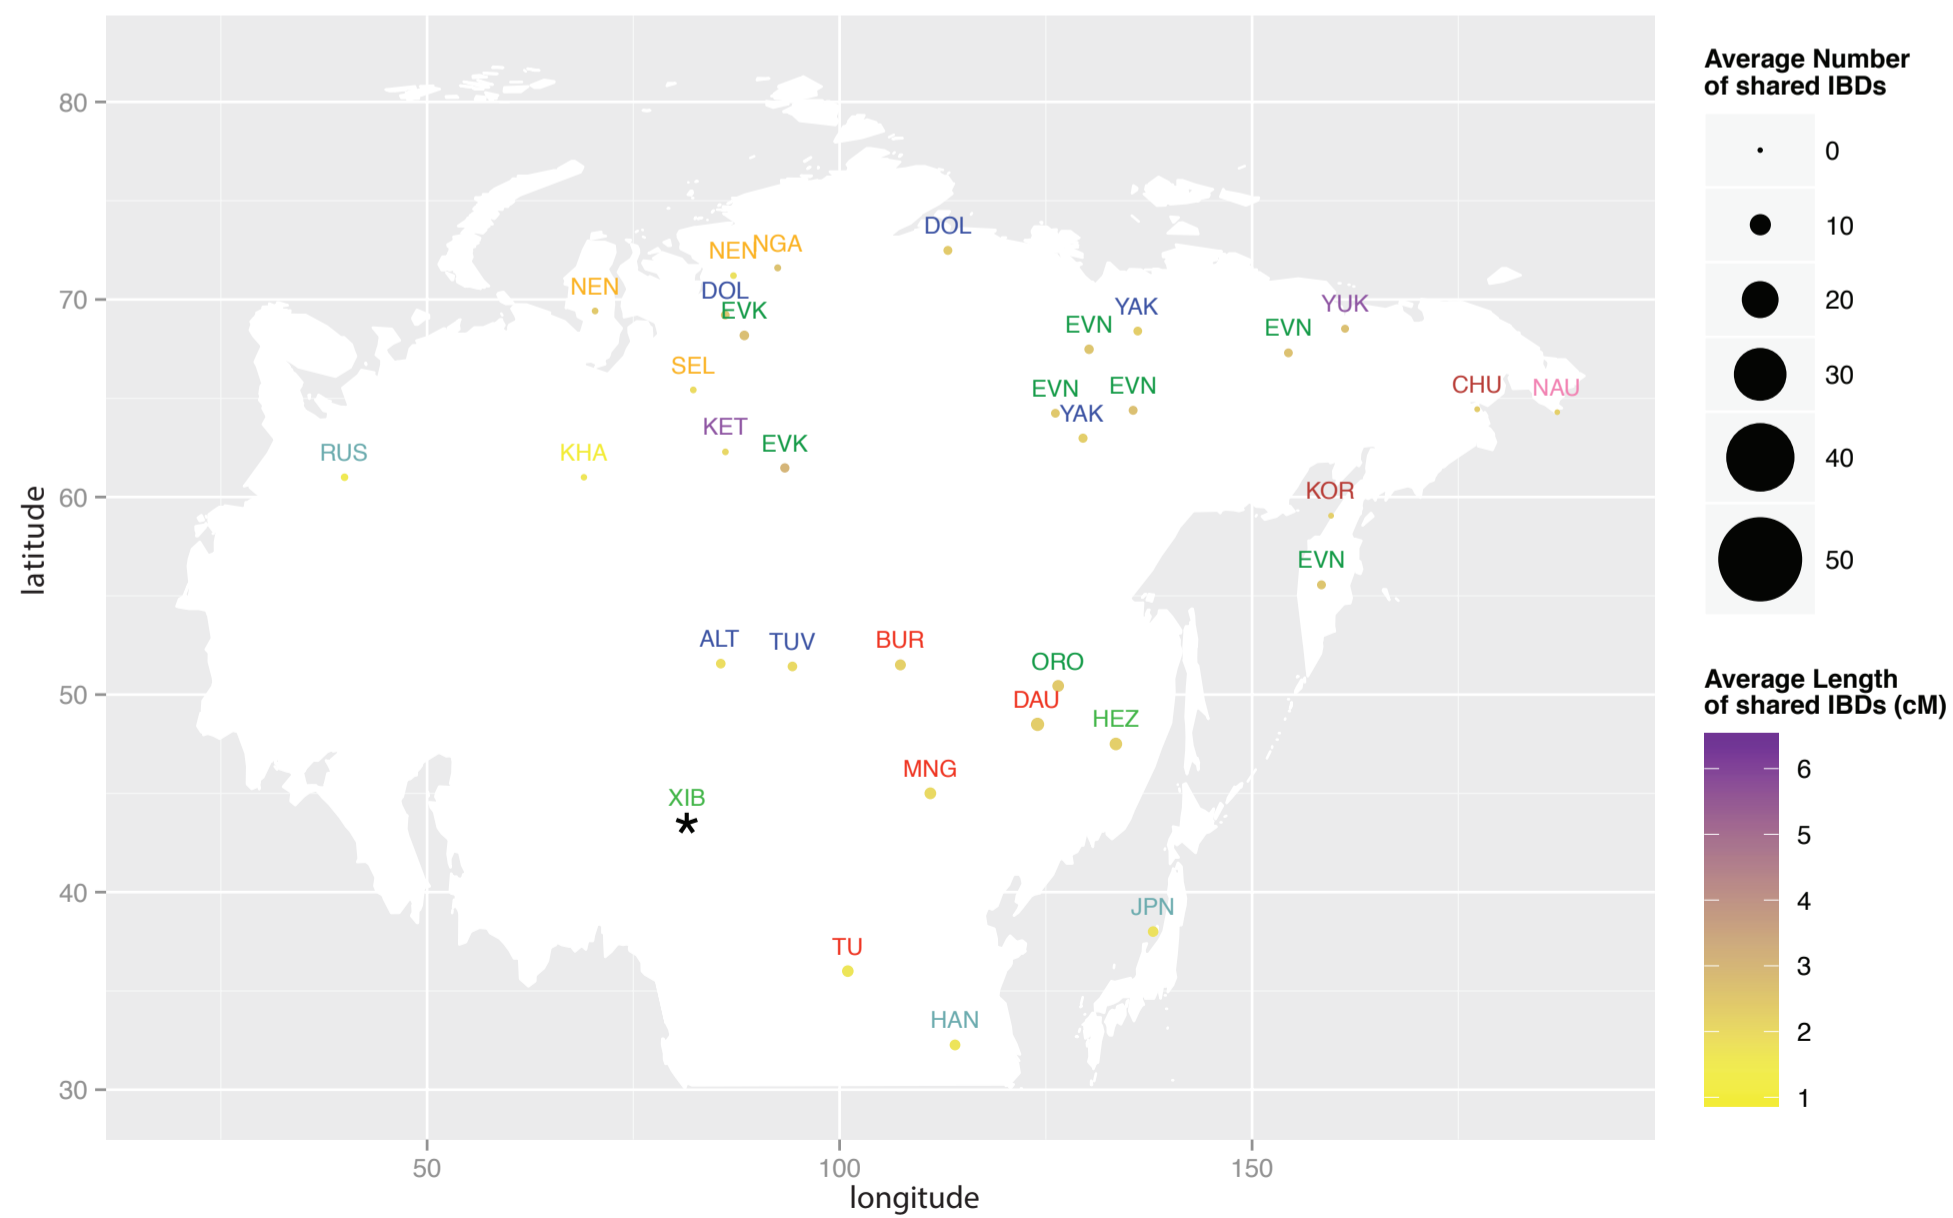

Yakuts Central

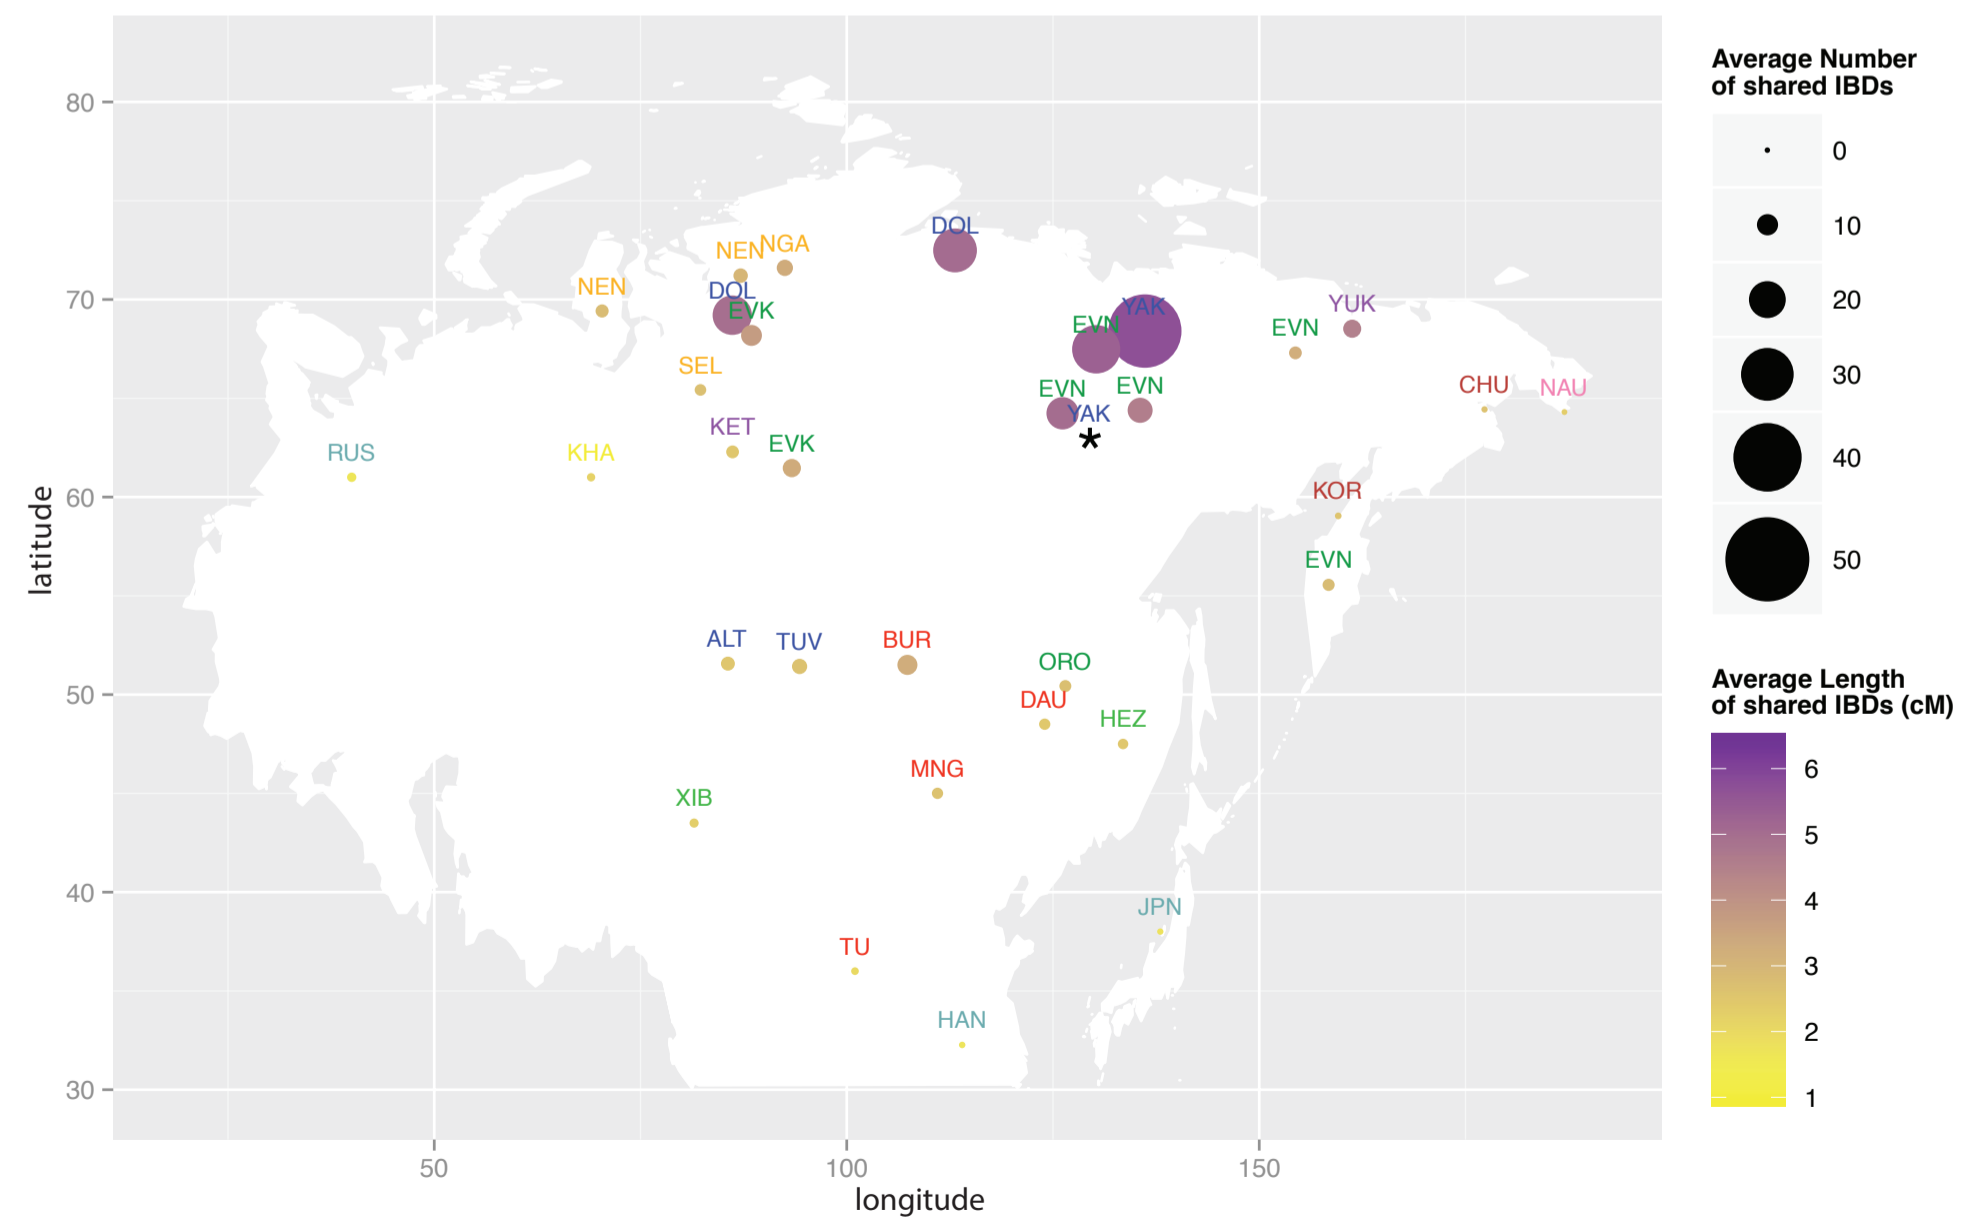

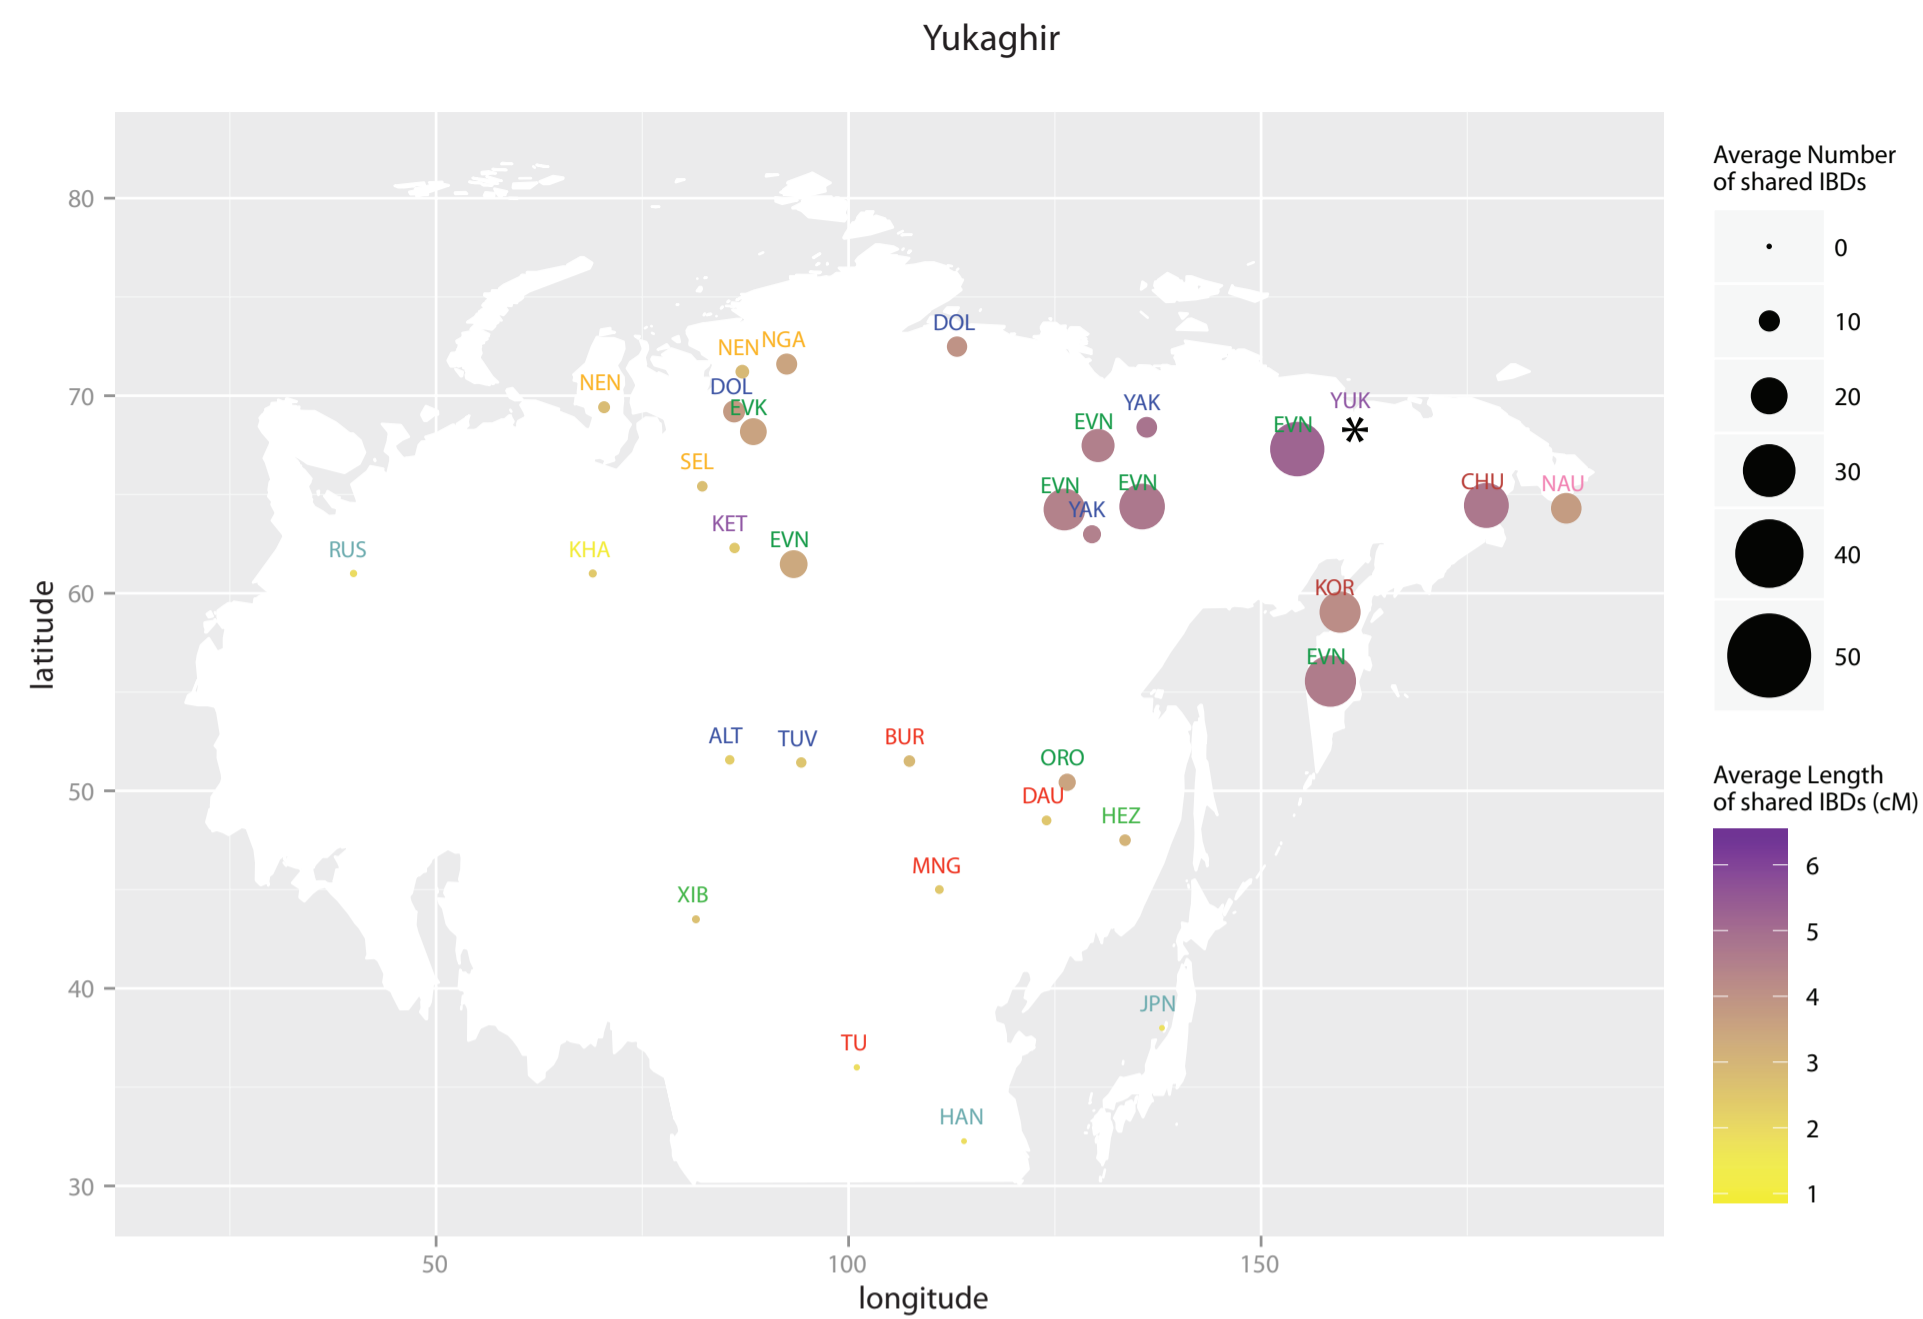

FIGURE S12. Recent relatedness based on IBD blocks. Populations are arranged in alphabetical order. Each data point represents the results for the comparison of the population marked with an asterisk to each of the other populations in the dataset. Data points are placed on the map according to the sampling location of each population (geographic coordinates are listed in Table S1). Population labels are abbreviated to the first 3 letters of the population name, except EVN = Even, EVK = Evenk, MNG = Mongolian, JPN = Japanese. Each label is color coded according to the population's linguistic affiliation as described in the legend to Figure 1 of the main text. The size of each circle is proportional to the mean number of IBD segments shared between the population marked with an asterisk and the population named in the label. The color intensity is proportional to the mean length of such shared IBD segments.





Italy\_Bergamo

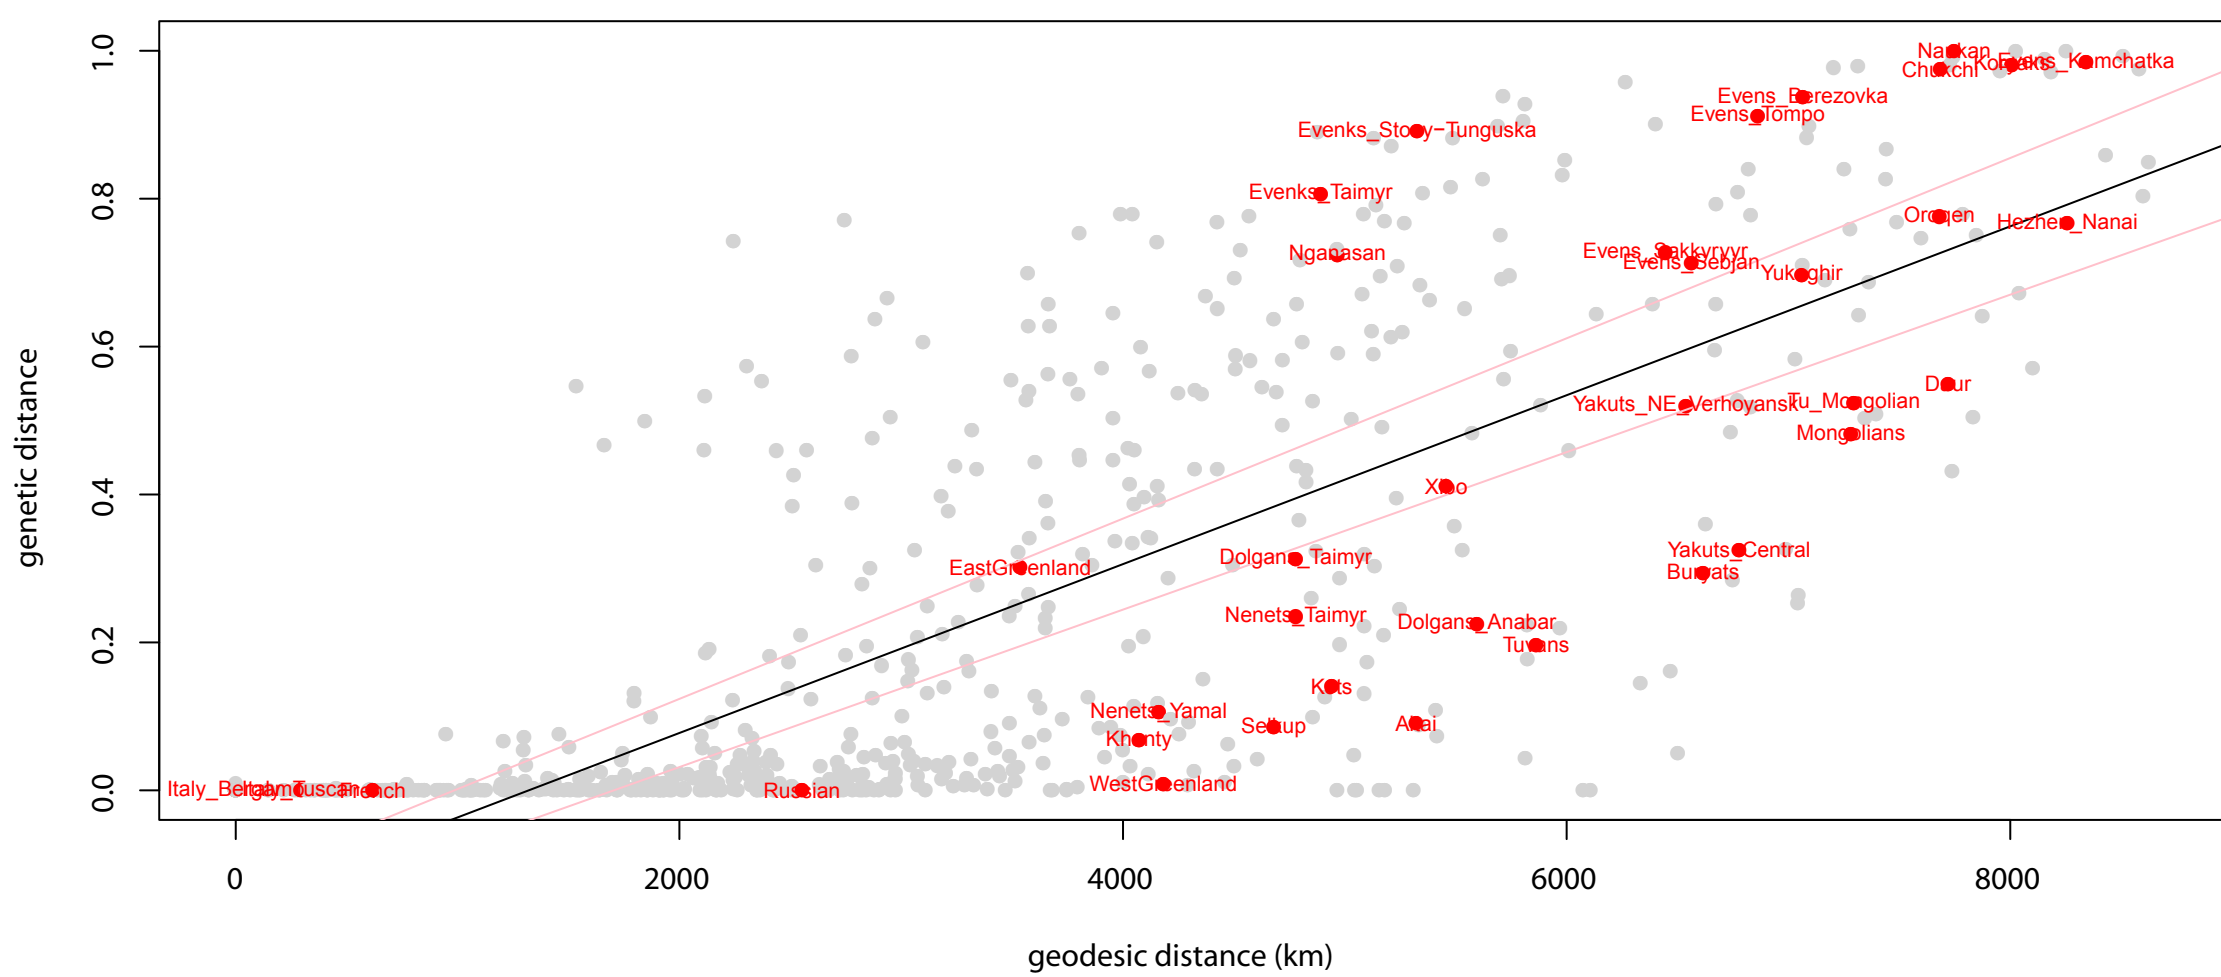

Italy\_Tuscan

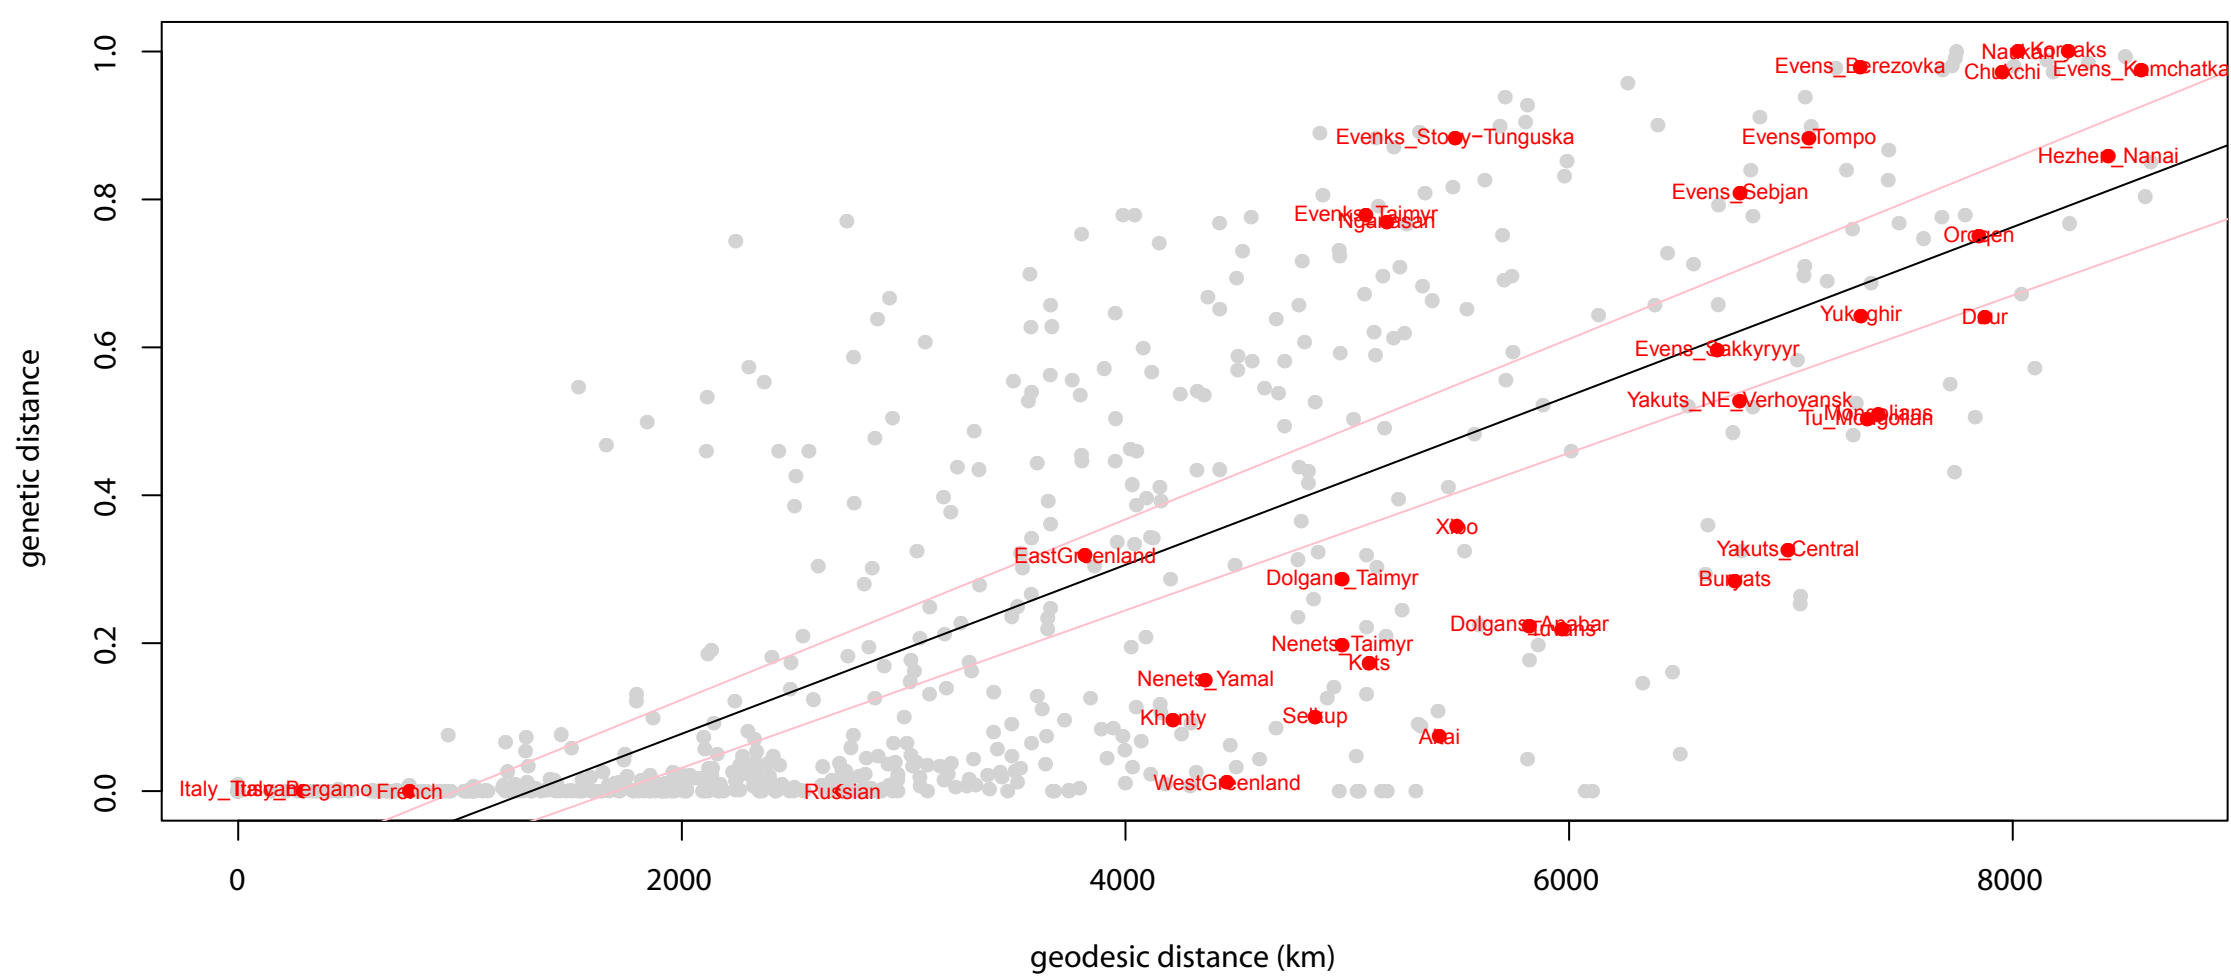

Kets

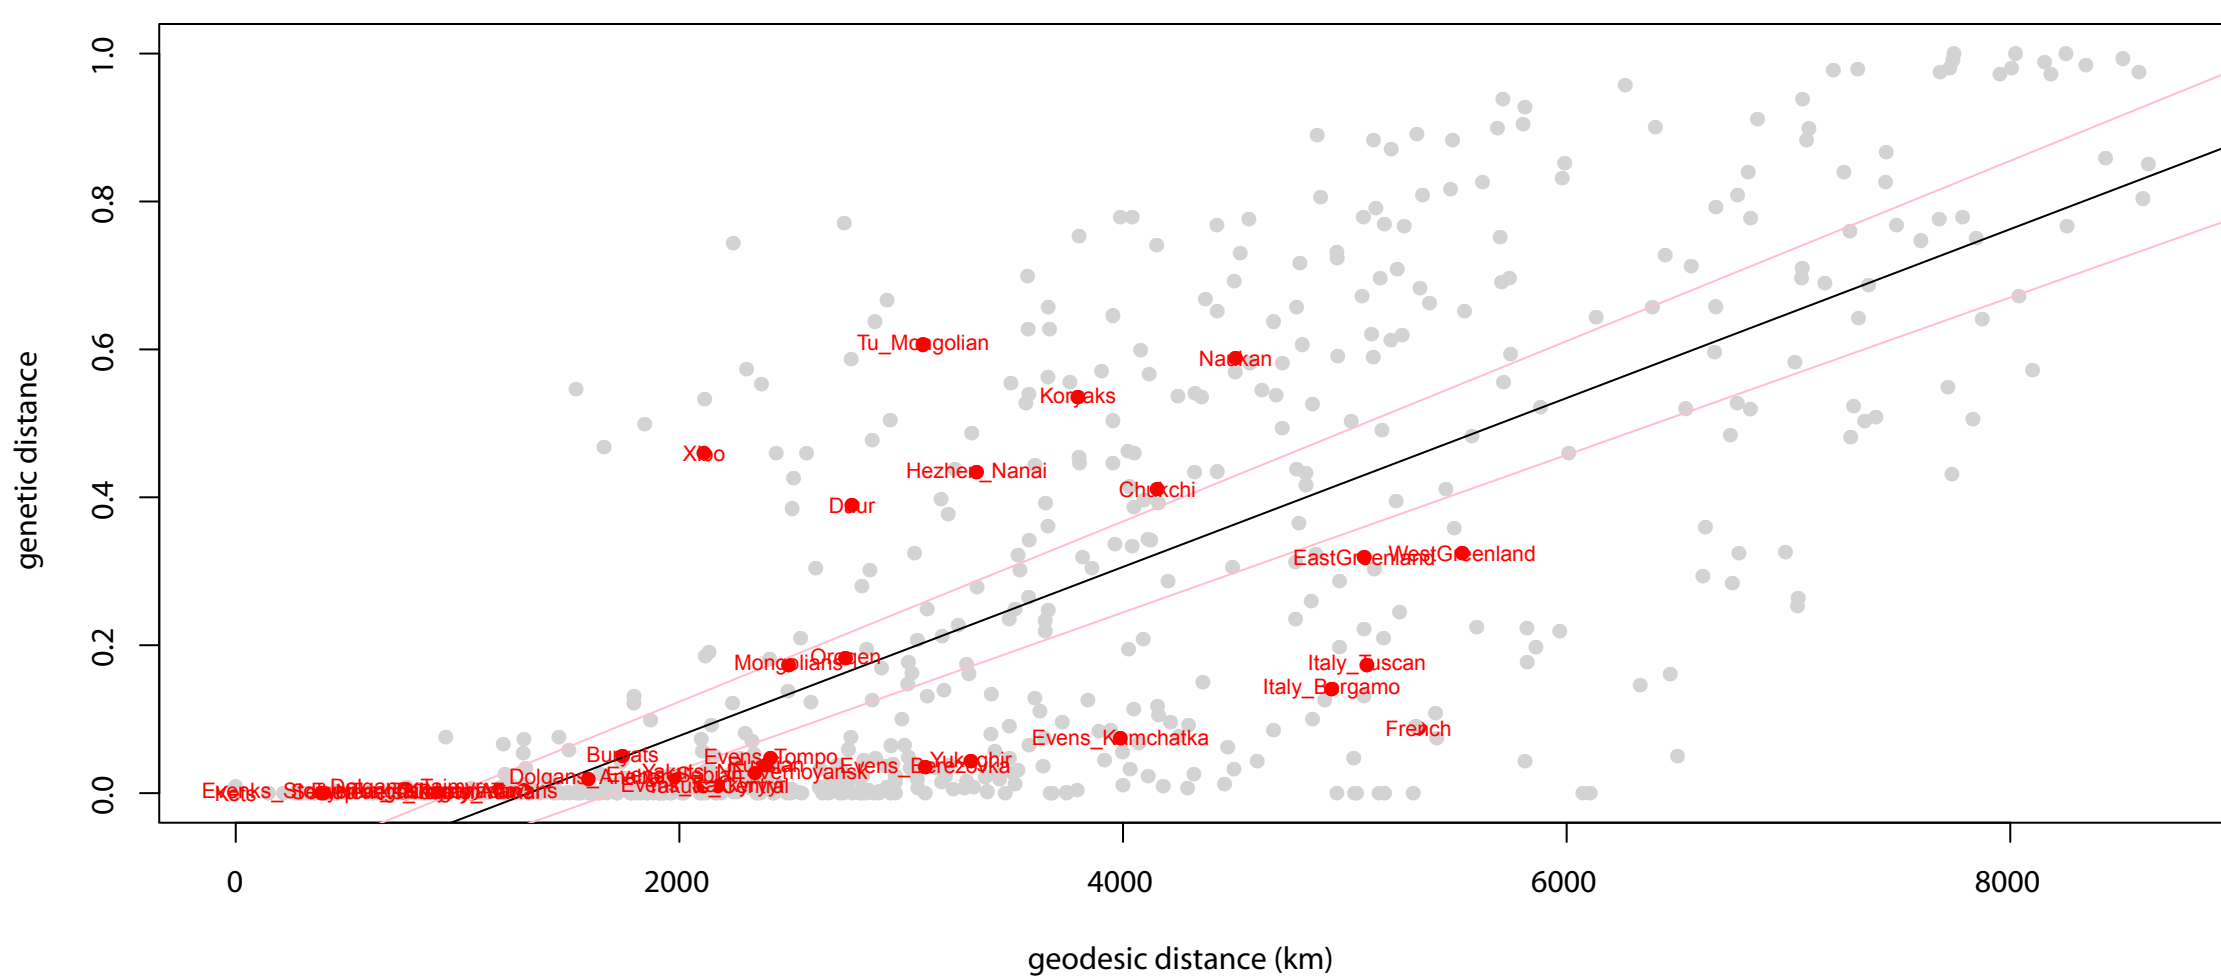

Khanty

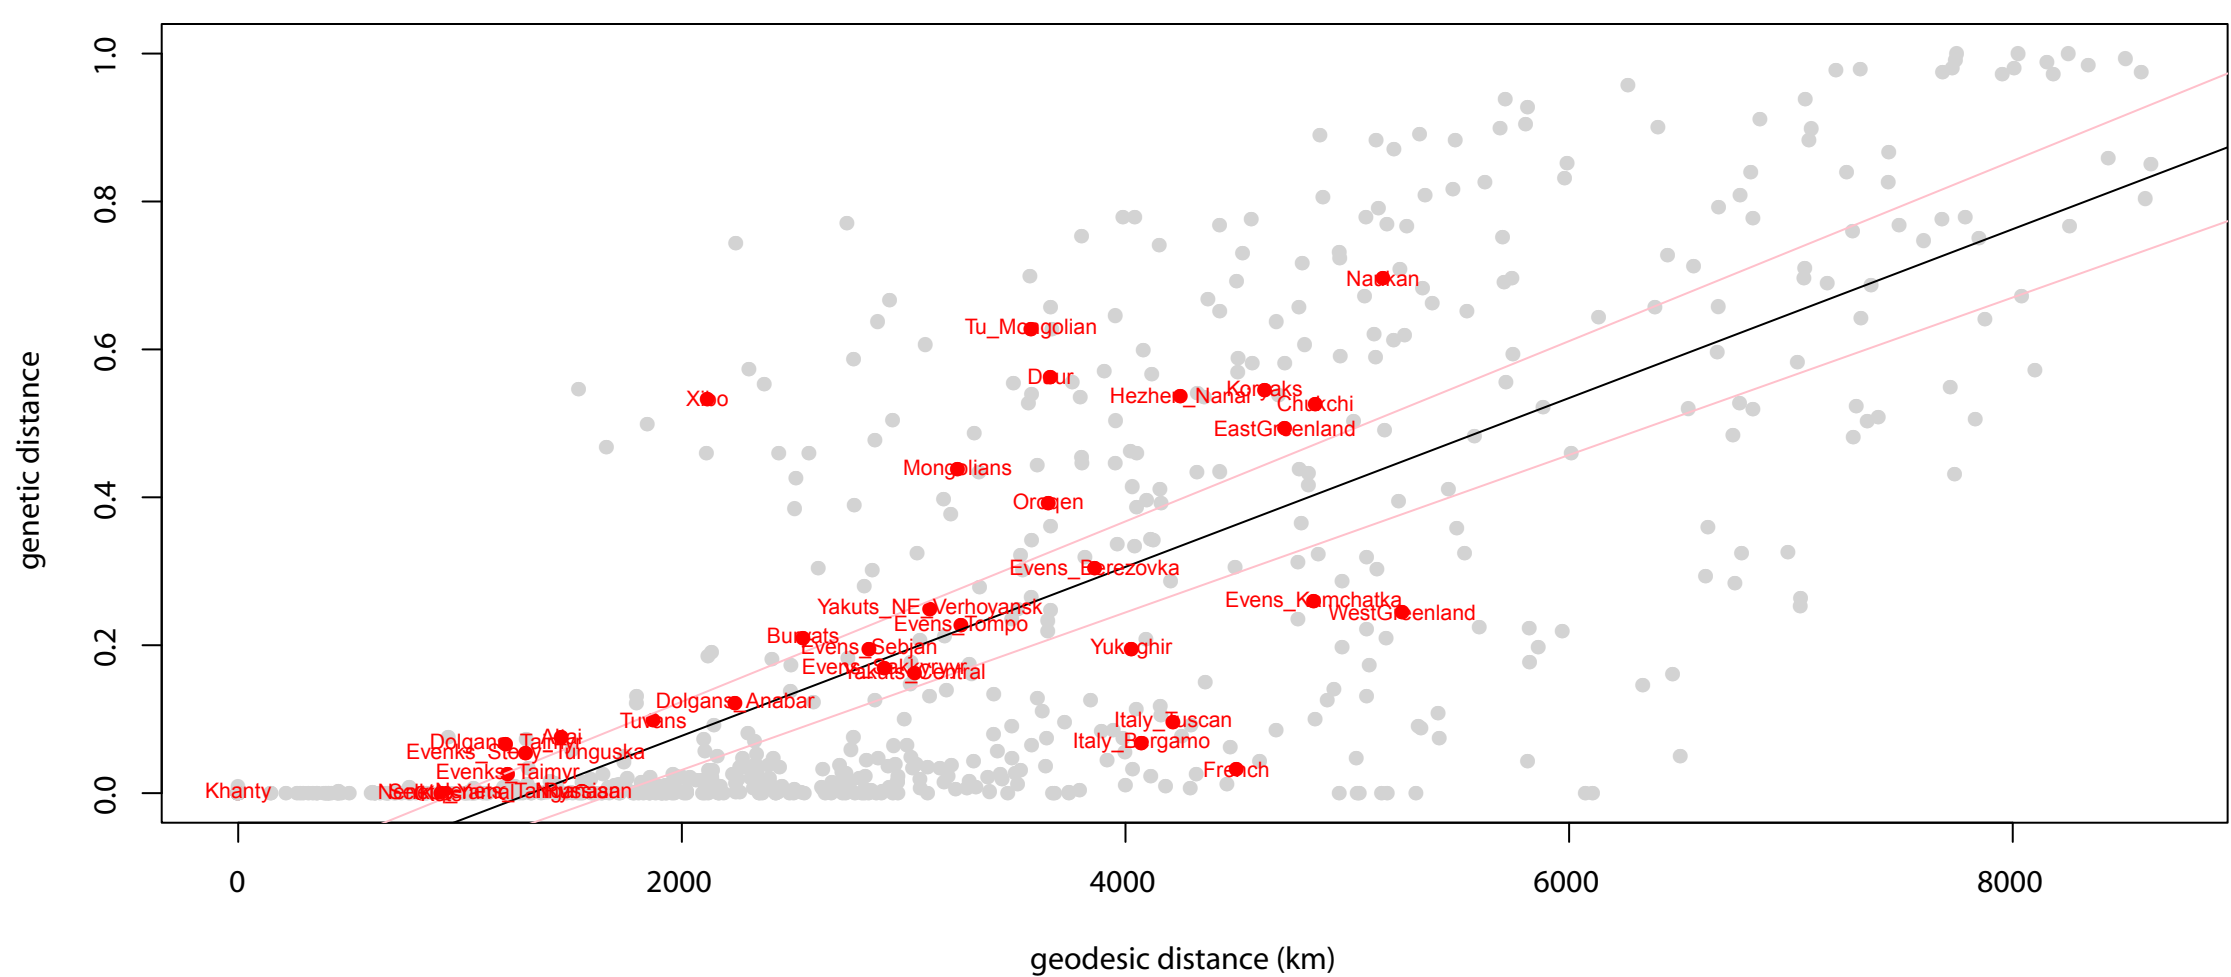

Koryaks

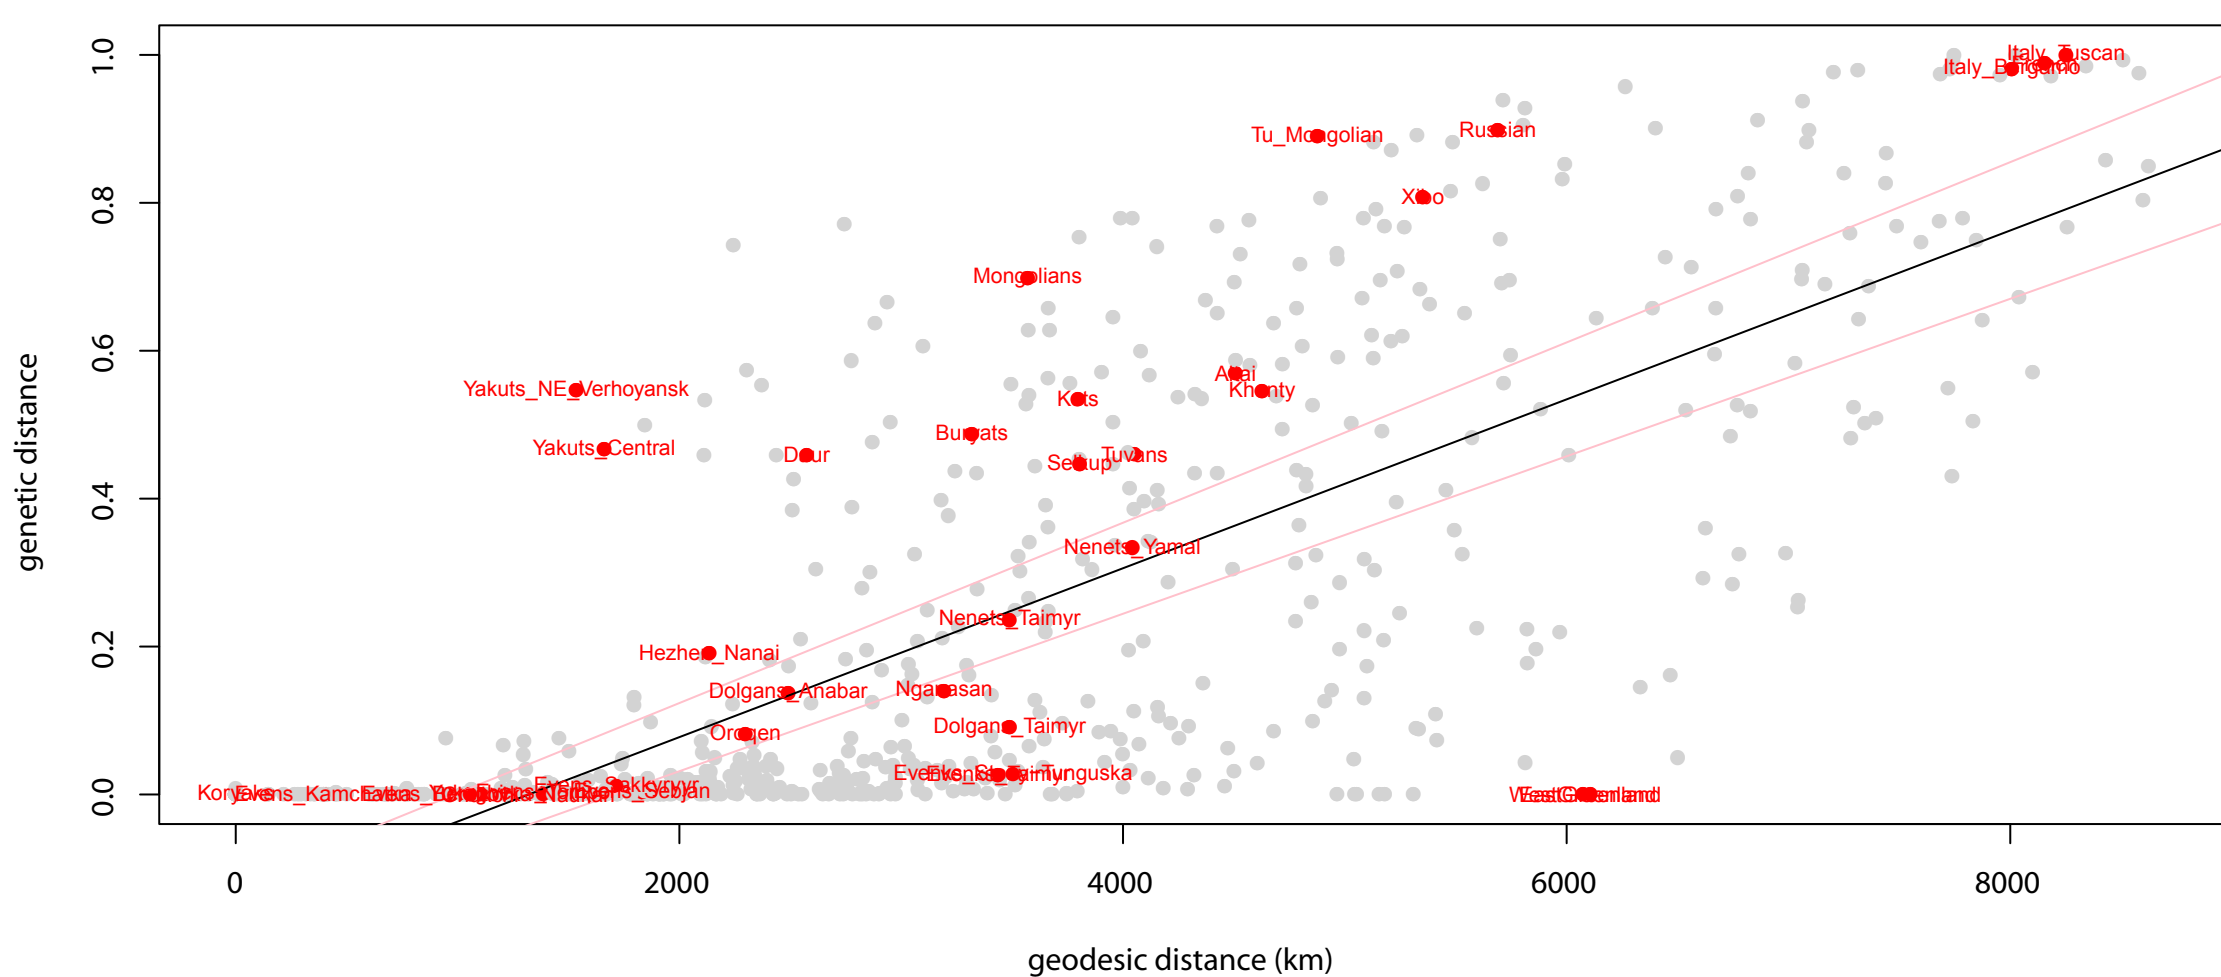

Mongolians

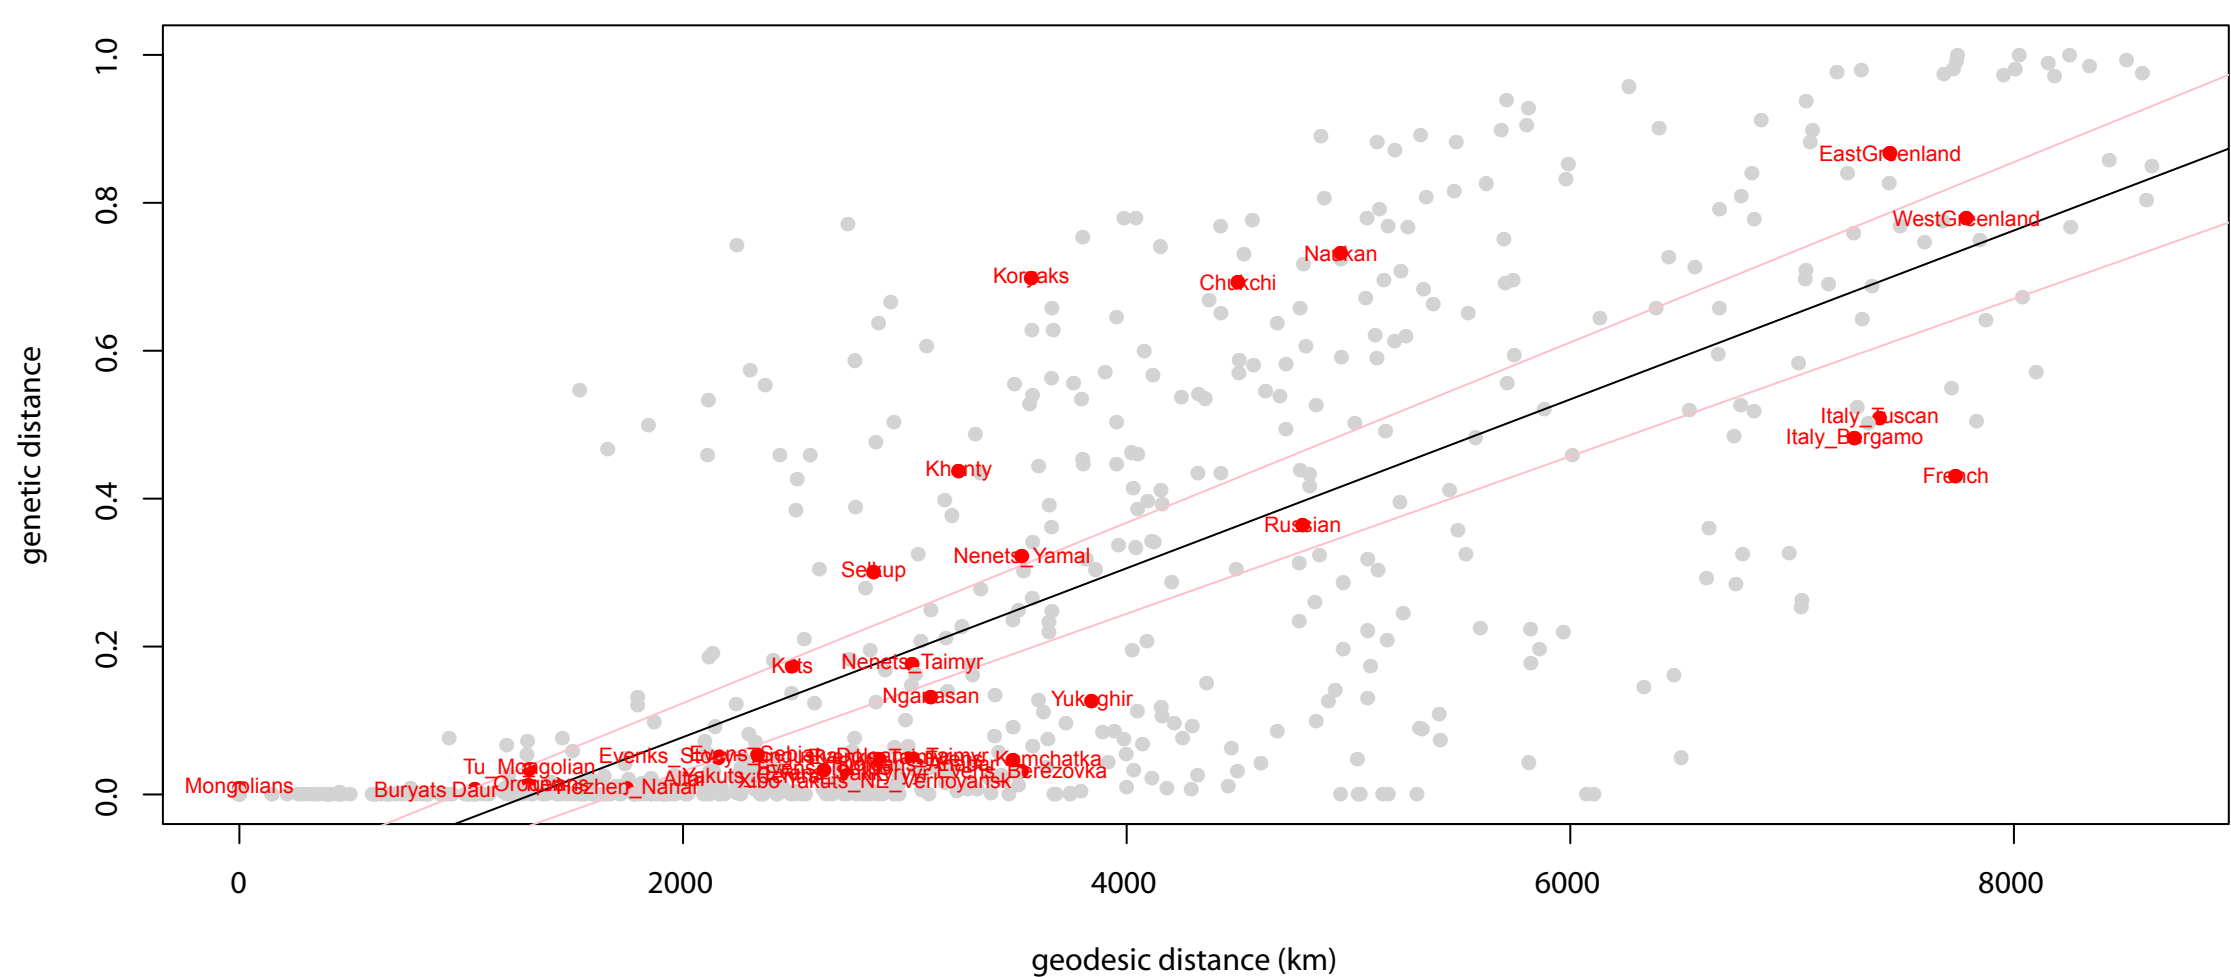

Naukan

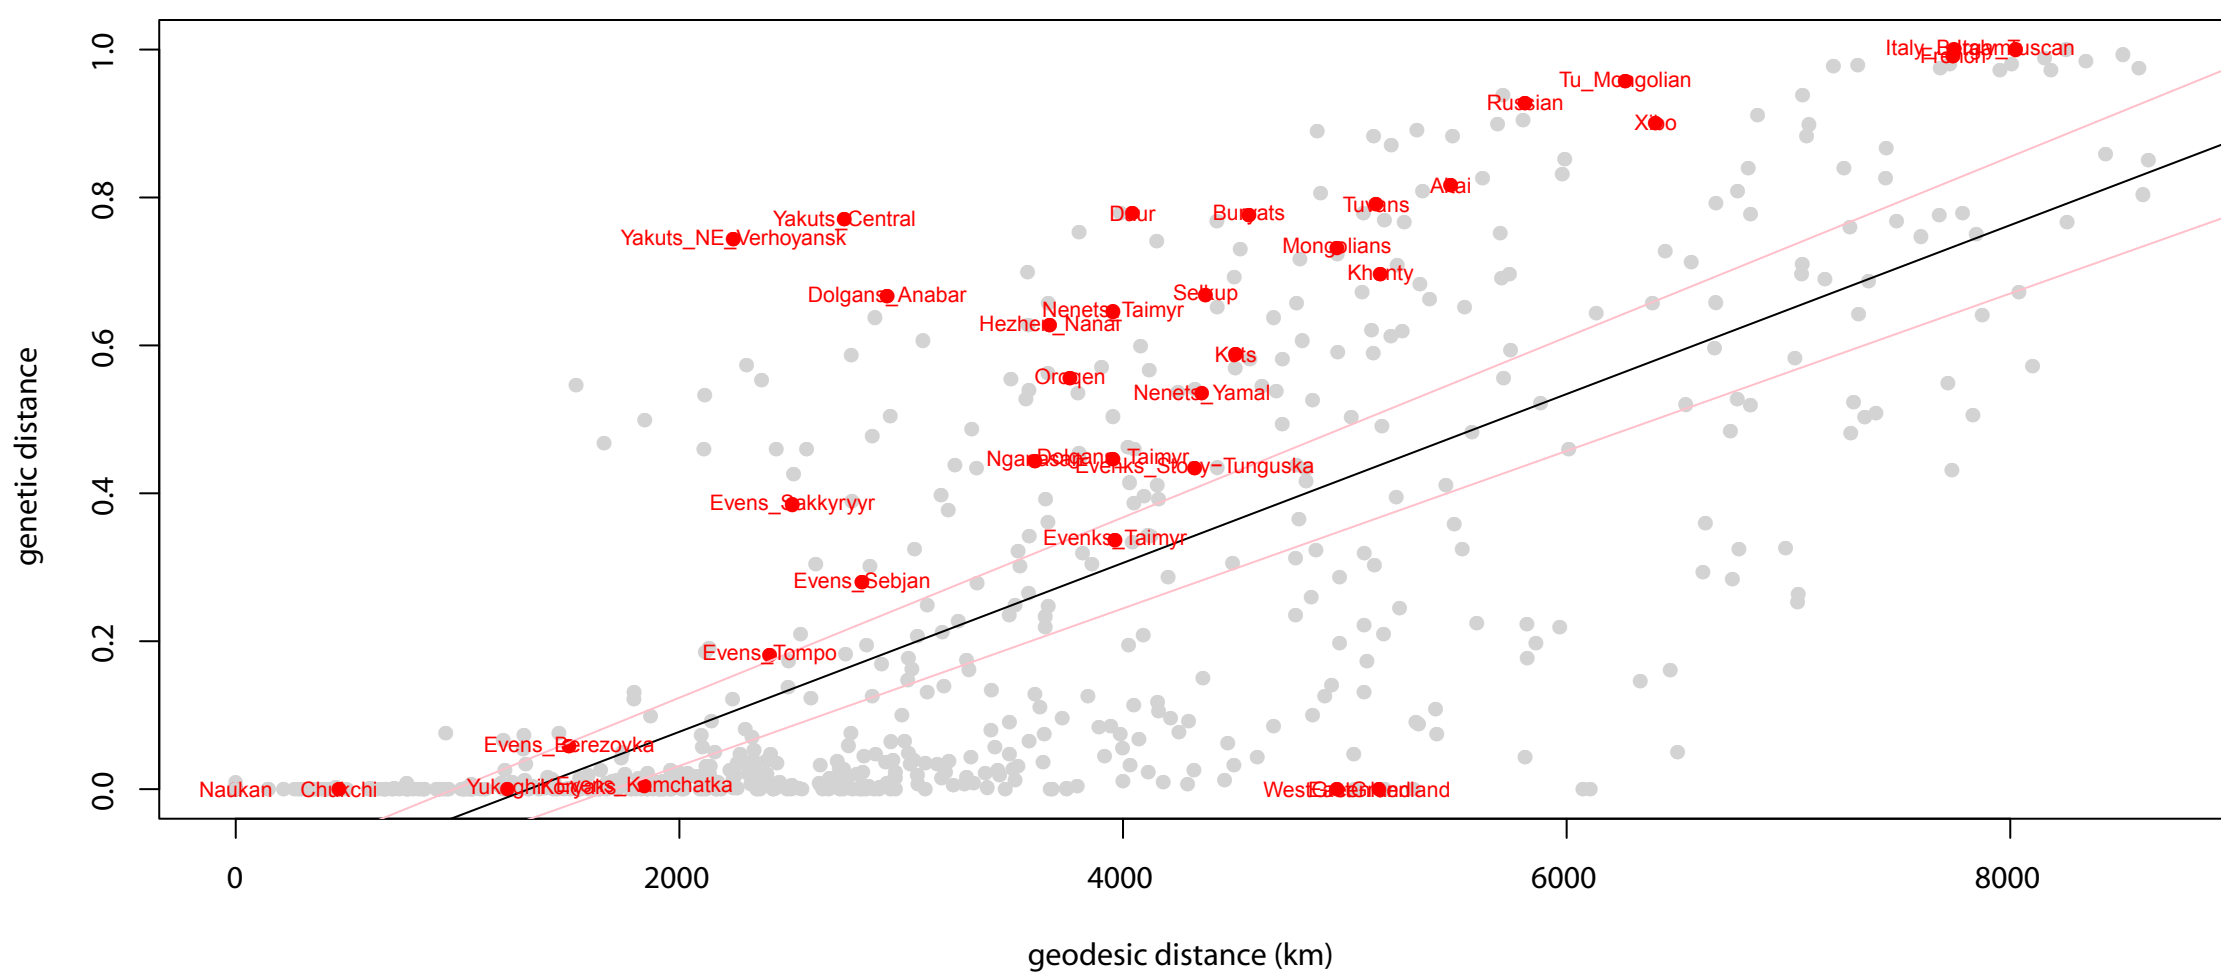

Nenets\_Taimyr

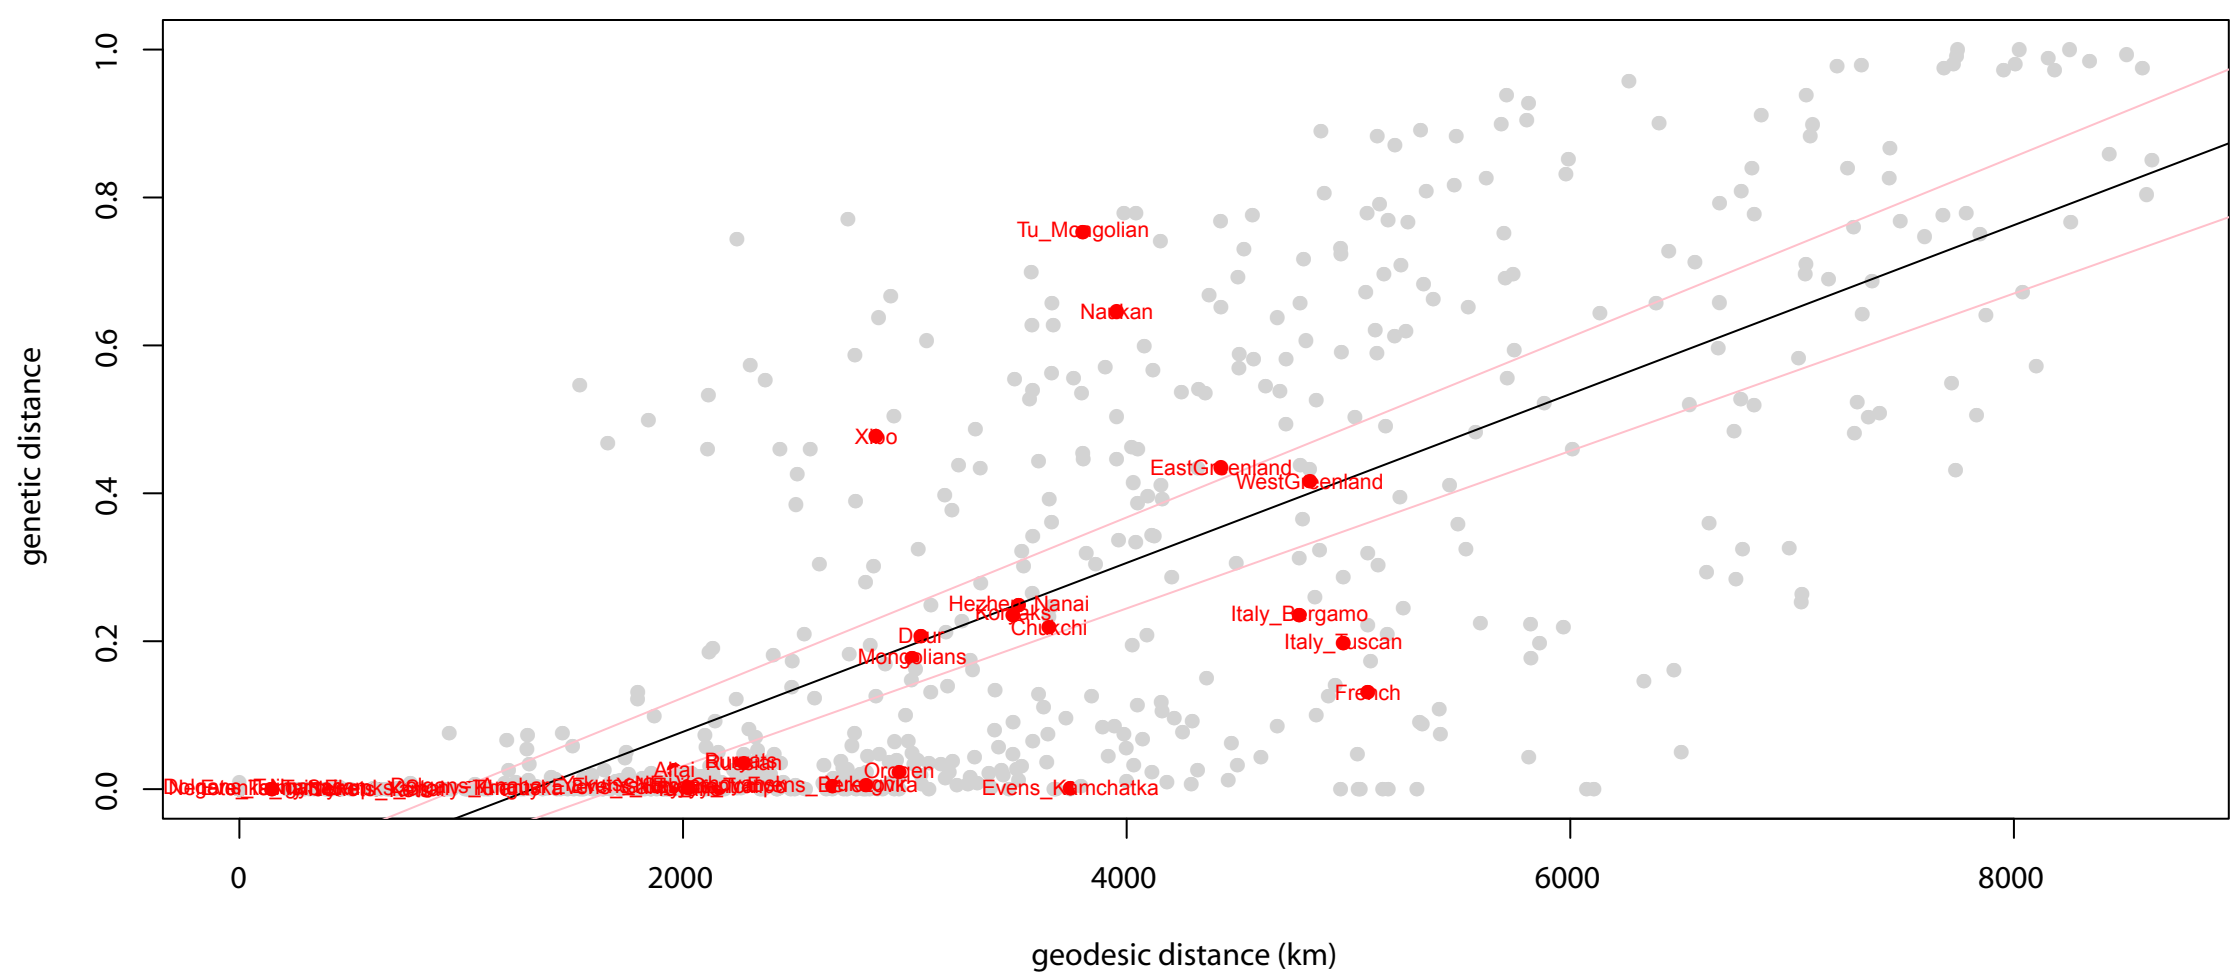



**WestGreenland**

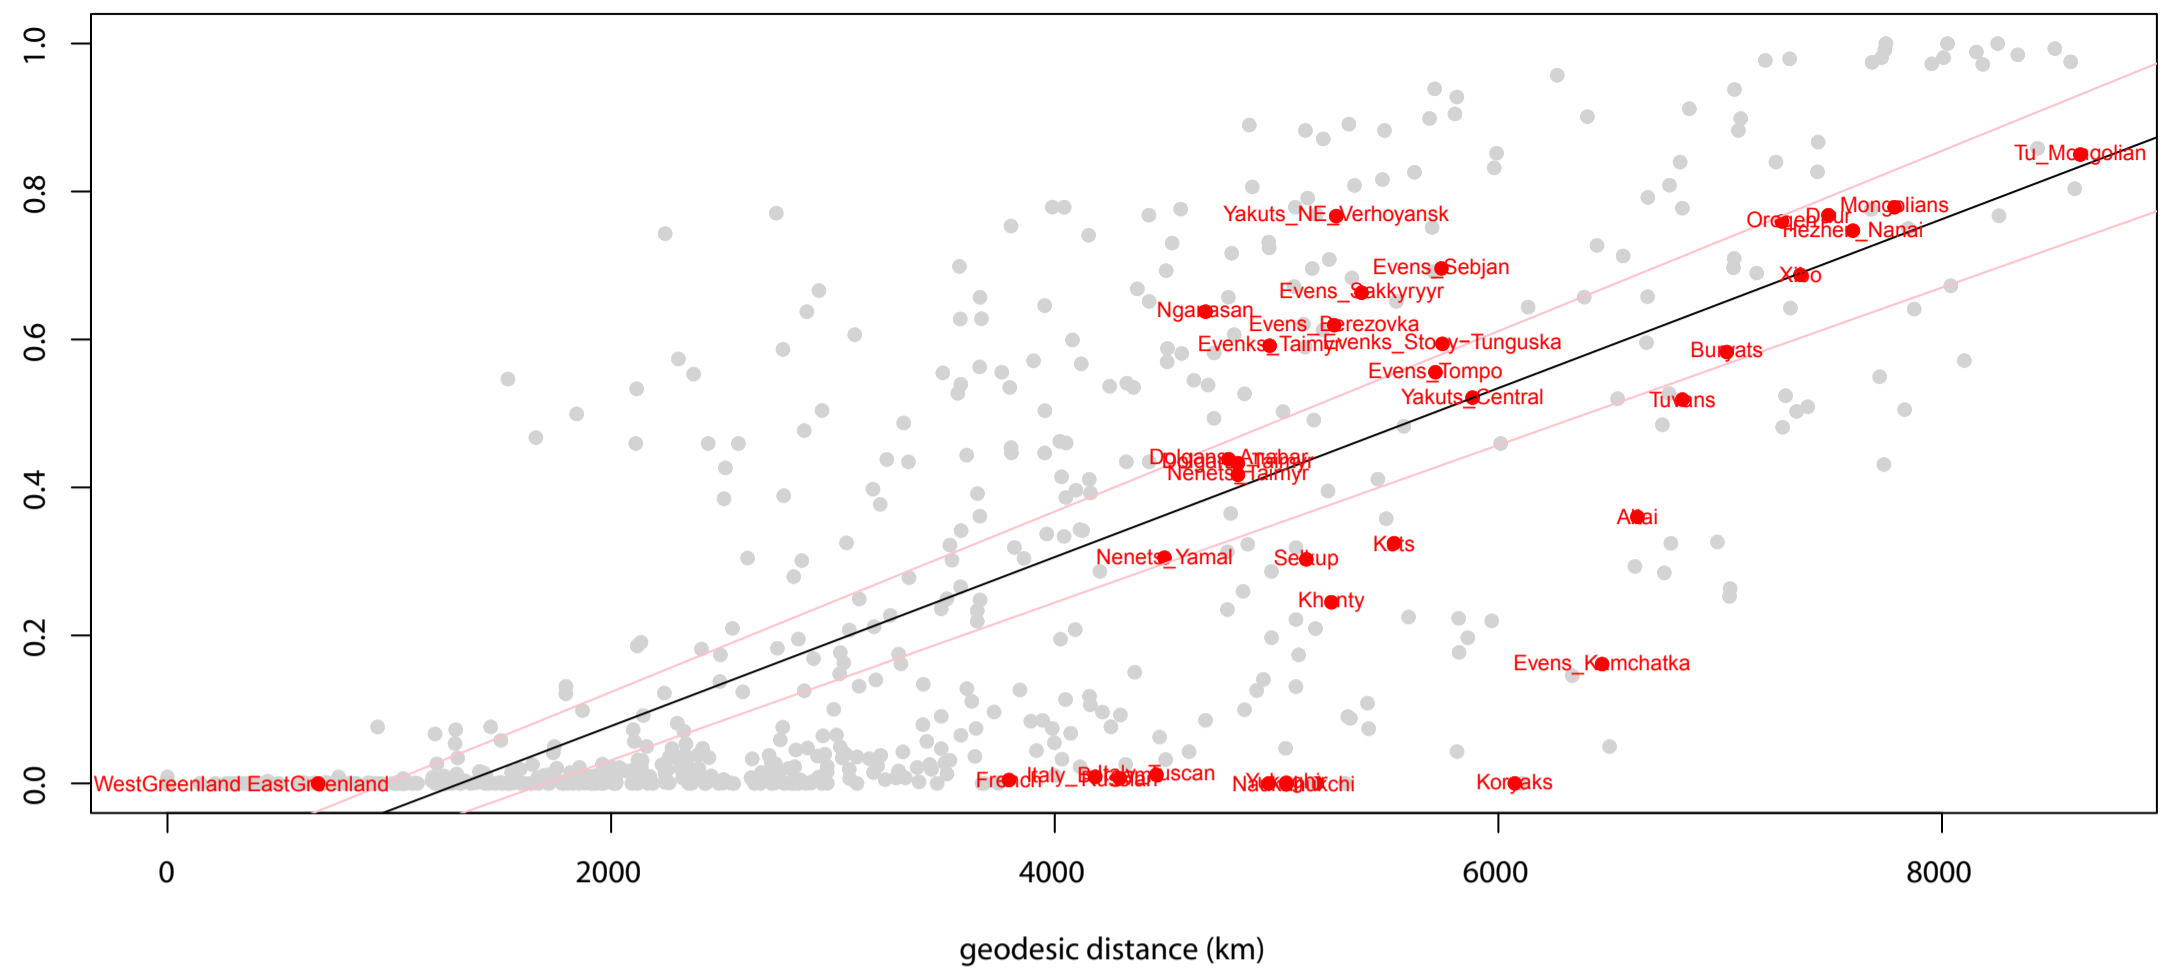

**Xibo**

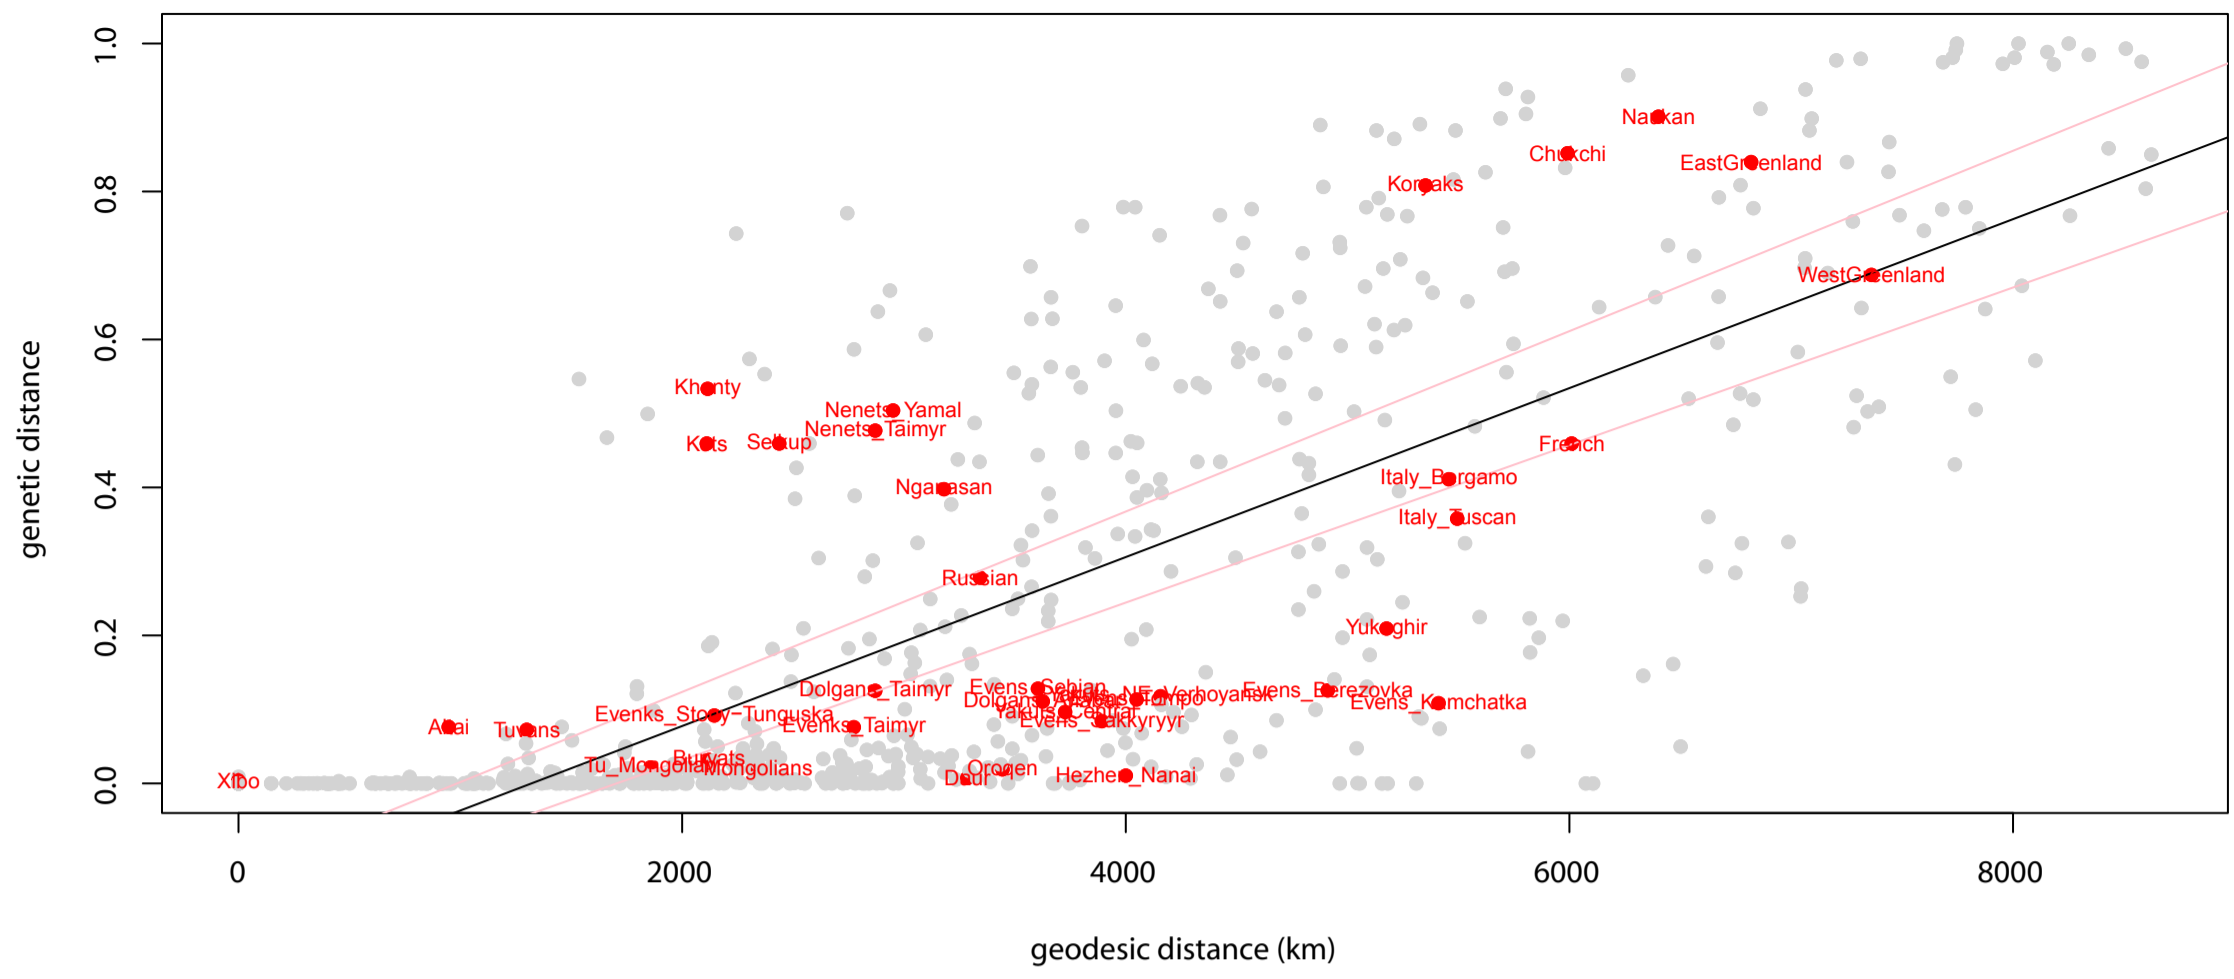

**Yakuts\_Central**

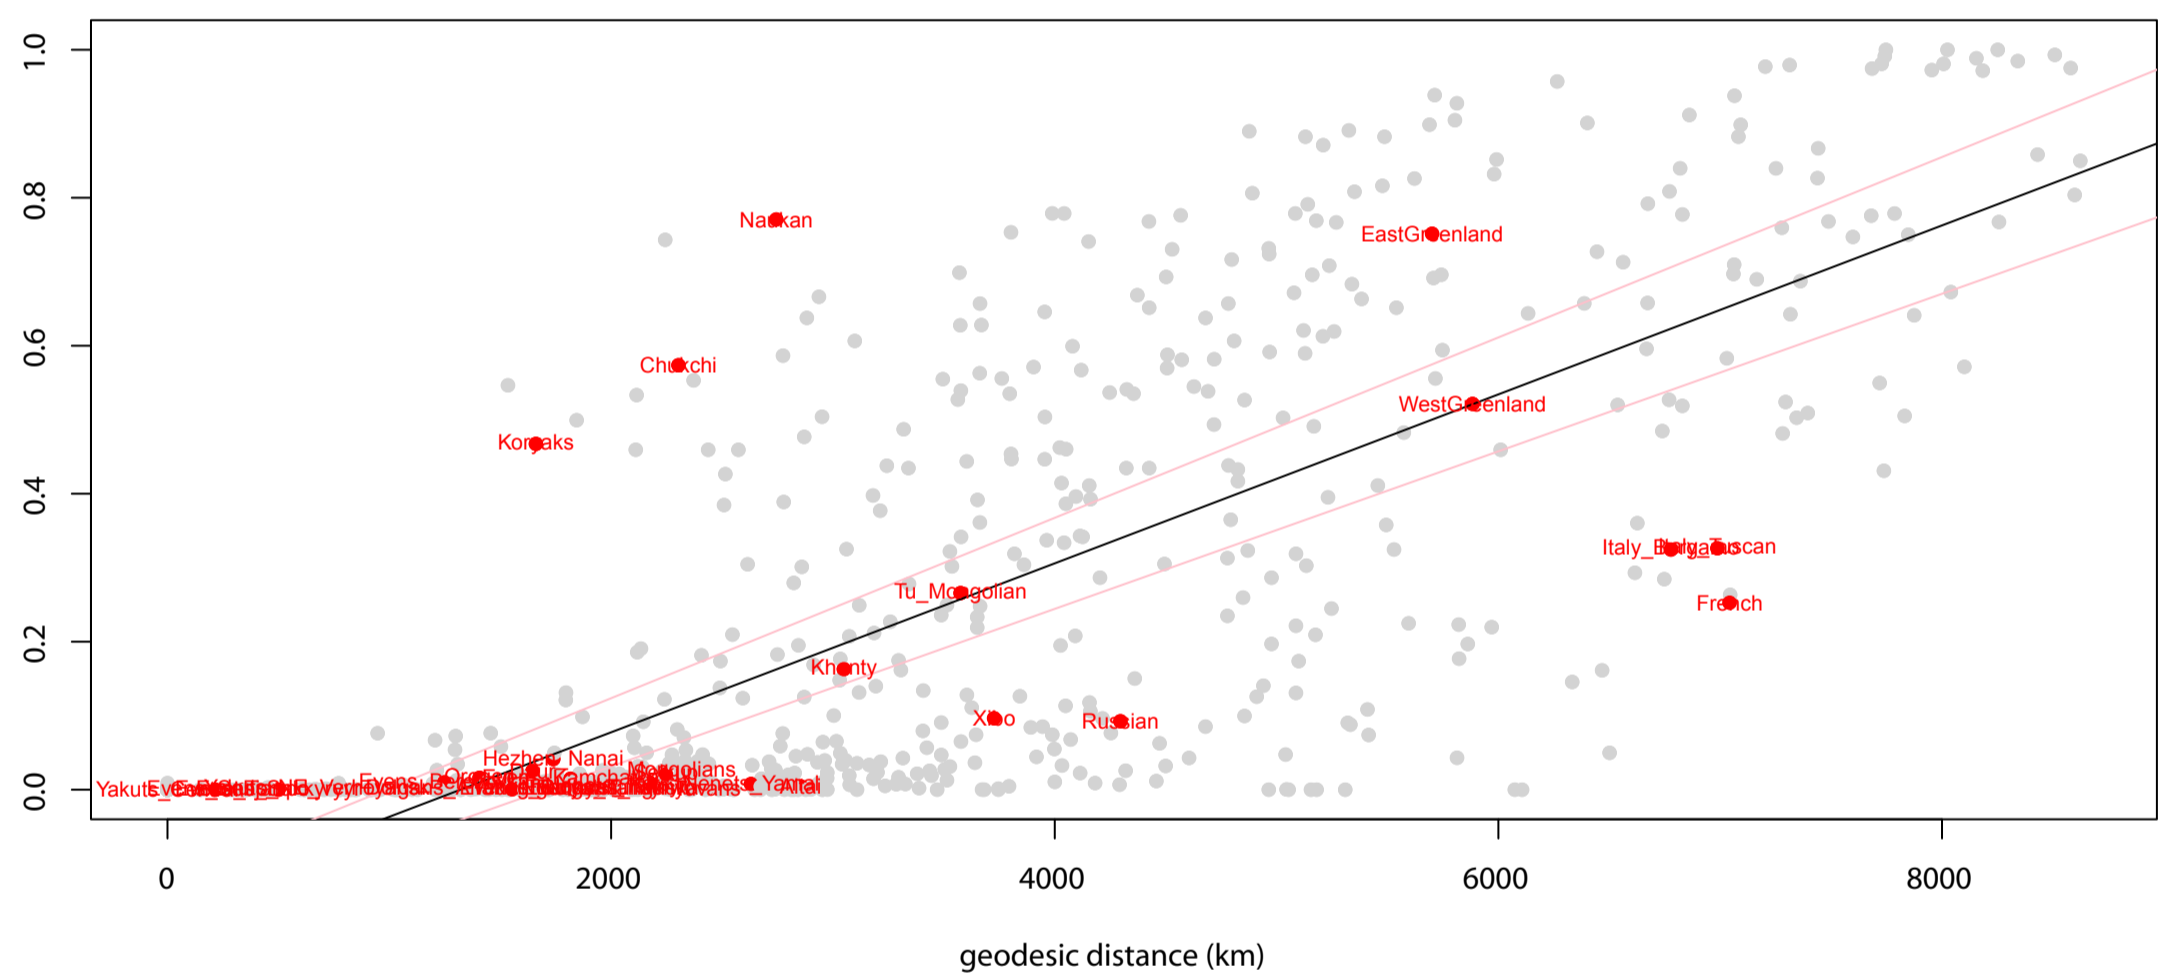

**Yakuts\_NE\_Verhoyansk**

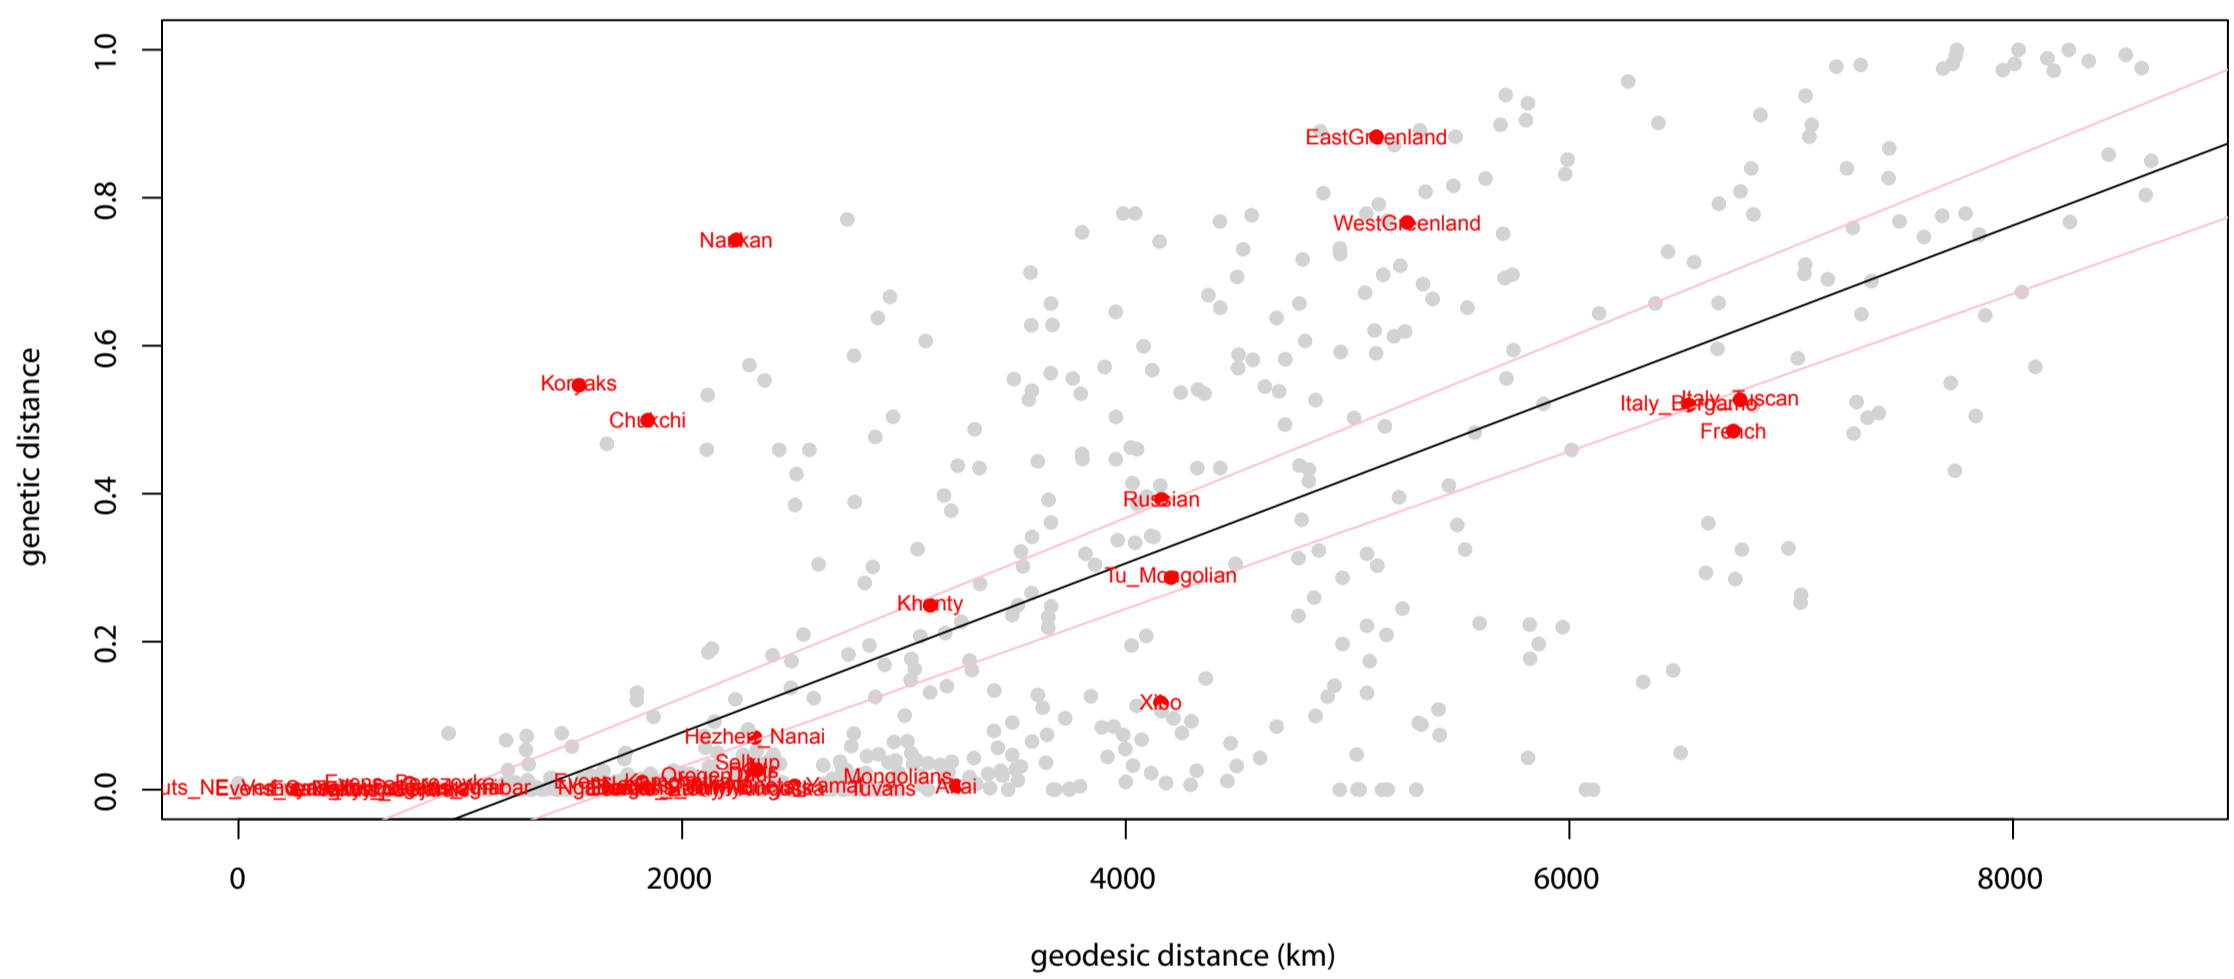

**Yukaghir**

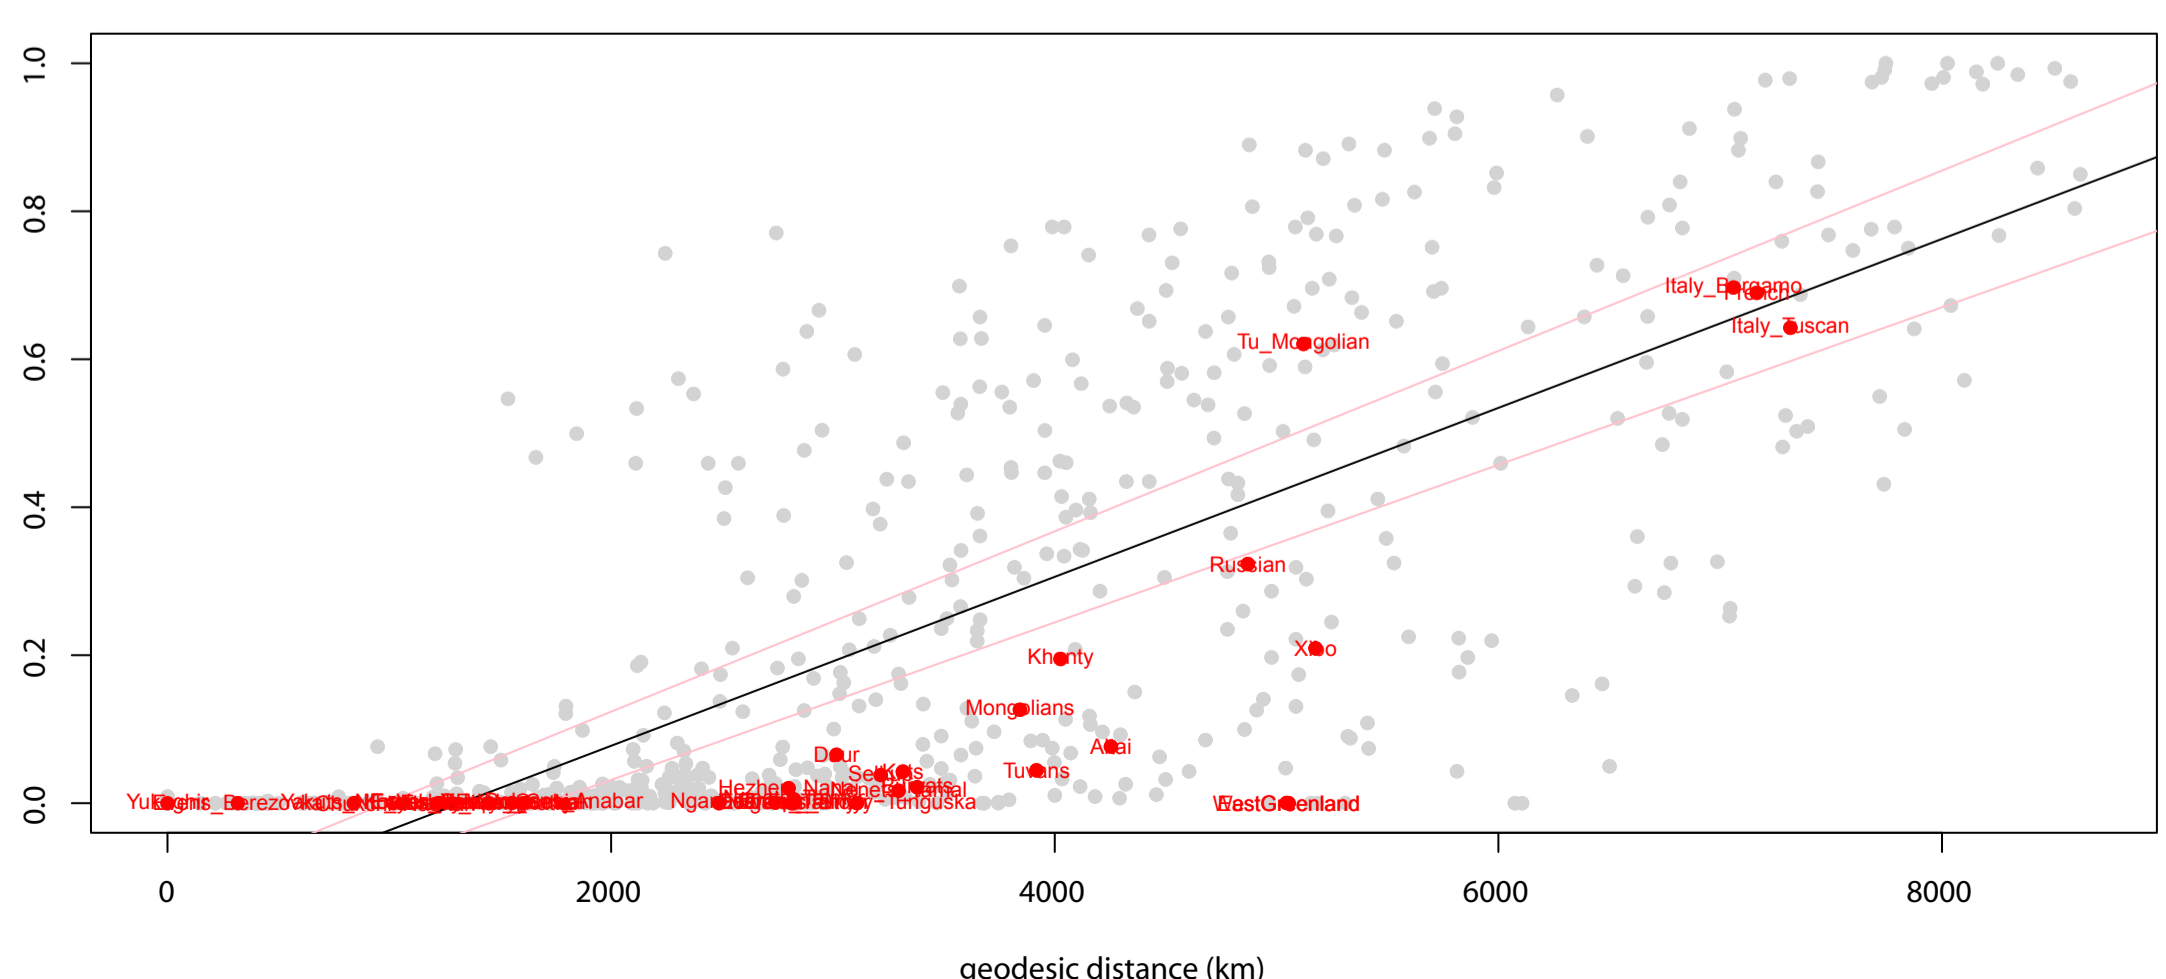

FIGURE S13. Relationship between genetic and geographic distances. Genetic distances were calculated based on the inverse of the IBD-sharing matrix. The regression line is drawn in black and the associated 95% confidence interval in red. In each plot red dots denote pairwise comparisons between the population indicated in the plot's title and every other population, while all other data points are in grey.



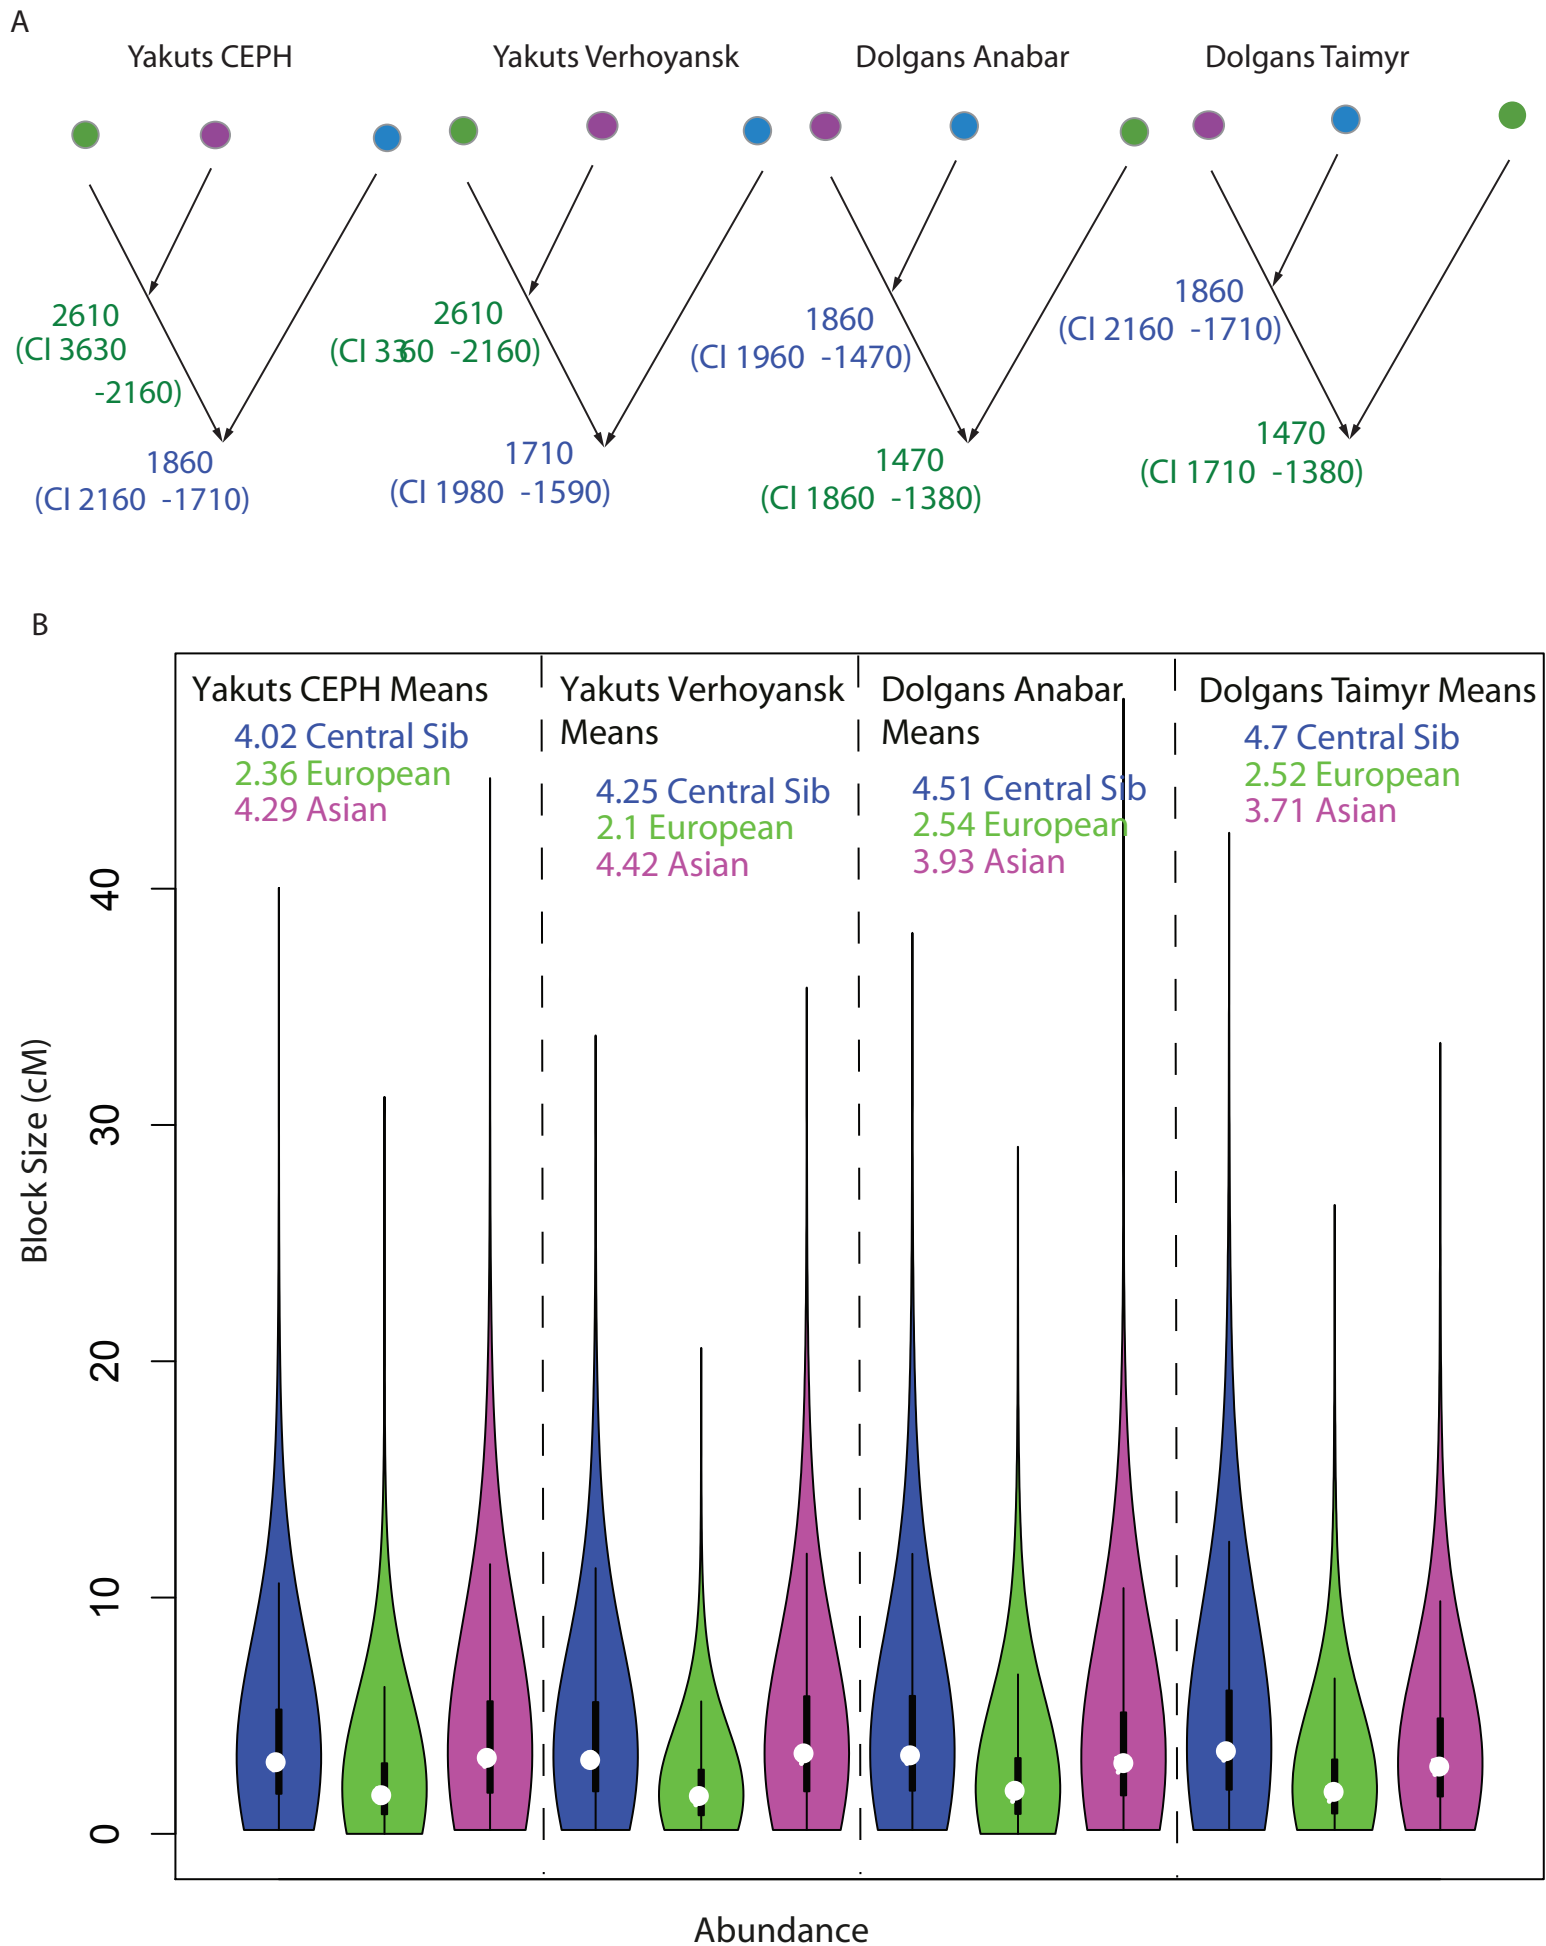

FIGURE S14. Admixture profiles for the northern Siberian Turkic-speaking populations: Yakuts and Dolgans. (A) Admixture history graphs and admixture dates inferred for each population and each admixture episode. Proxy parental populations for the different ancestral components (represented as circles) were as follows: Light Green = Italians, Blue = Nnganasan, Pink = Han Chinese. (B) Cumulative distribution of all ancestry blocks. For each population the plot captures the total abundance of blocks of each ancestry (x axis) of different genetic lengths in cM (y axis); the average width of the blocks of each ancestry and variance around the mean are also shown.

A

Evenks\_Taimyr  
Evenks\_Stony-Tunguska

Evenks\_Sakkyryyr  
Evenks\_Sebjan  
Evenks\_Tompo

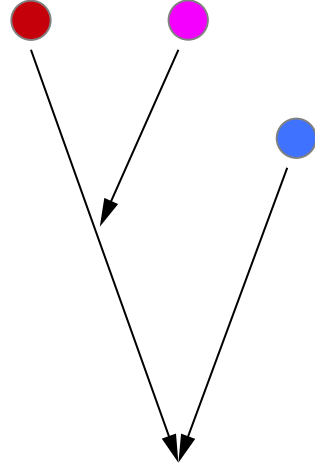

Evens\_Berezovka

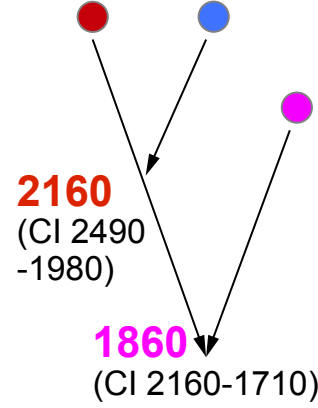

Evens\_Kamchatka

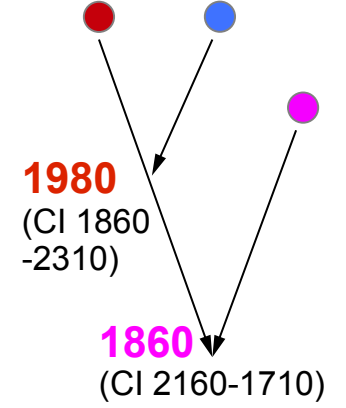

Xibo

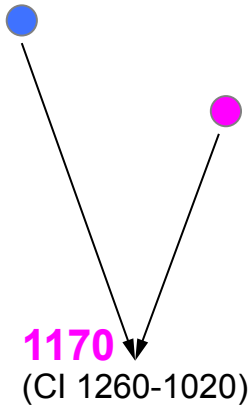

Oroqen

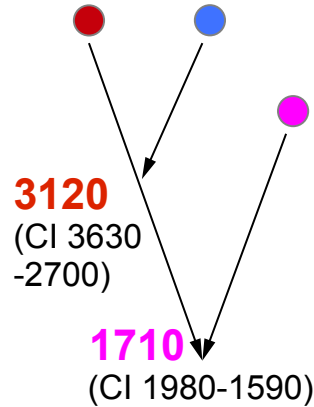

Hezhen

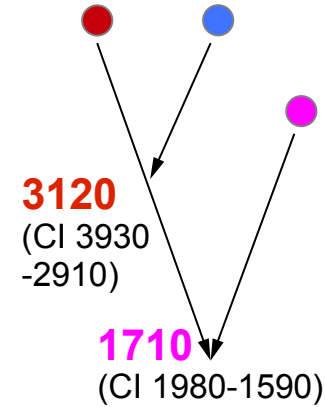

B

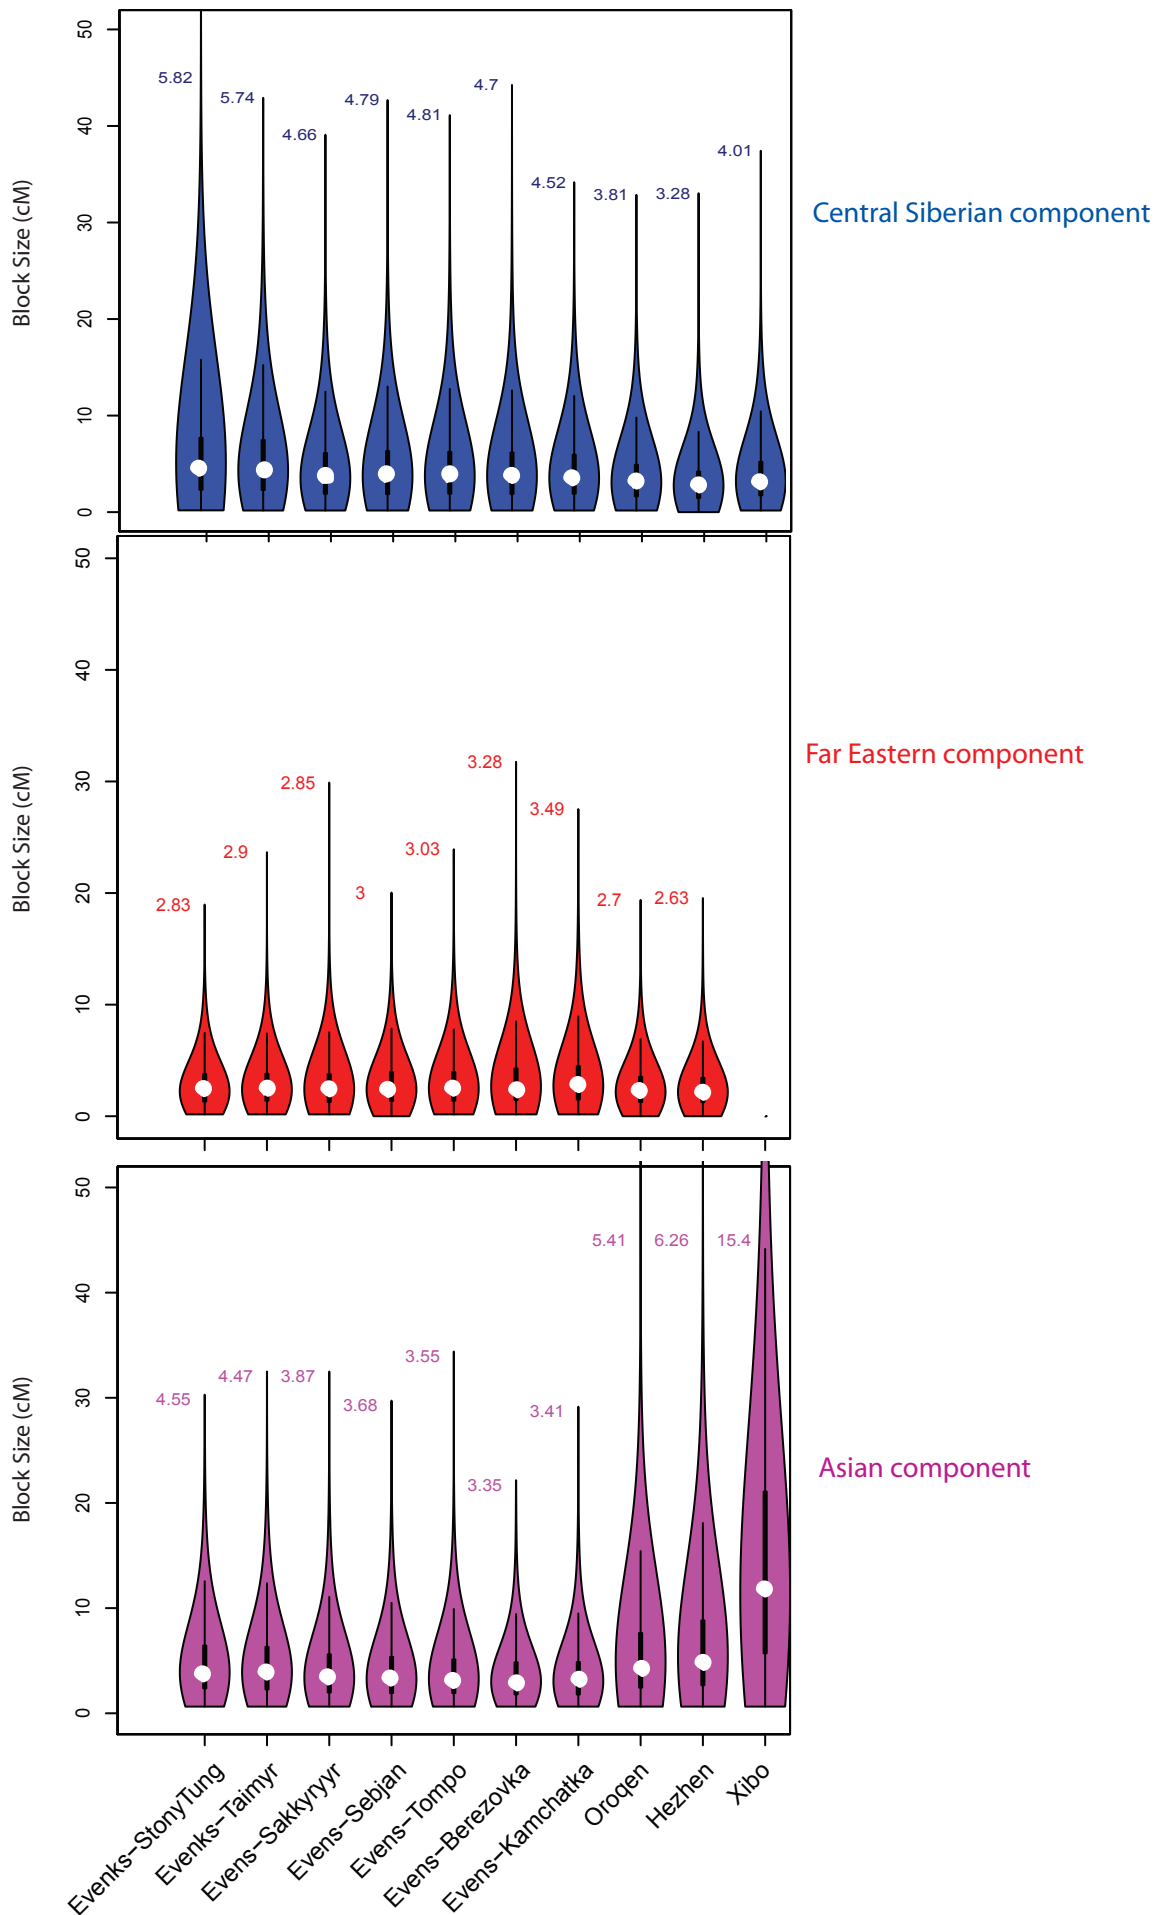

FIGURE S15. Admixture profiles for the Tungusic-speaking populations: Evenks, Evens, Oroqen, Hezhen and Xibo. (A) Admixture history graphs and admixture dates inferred for each population and each admixture episode. Proxy parental populations for the different ancestral components (represented as circles) were as follows: Blue = Nganasan, Red = Koryaks, Pink = Han Chinese. (B) Cumulative distribution of all ancestry blocks. For each population the plot captures the total abundance of blocks of each ancestry (x axis) of different genetic lengths in cM (y axis); the average width of the blocks of each ancestry and variance around the mean are also shown.

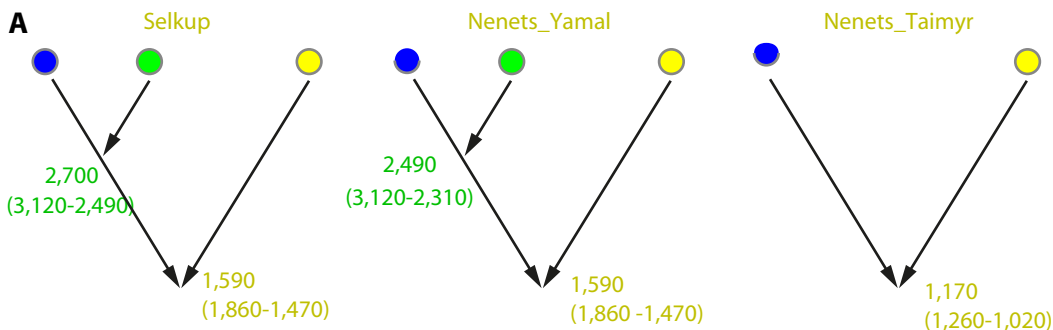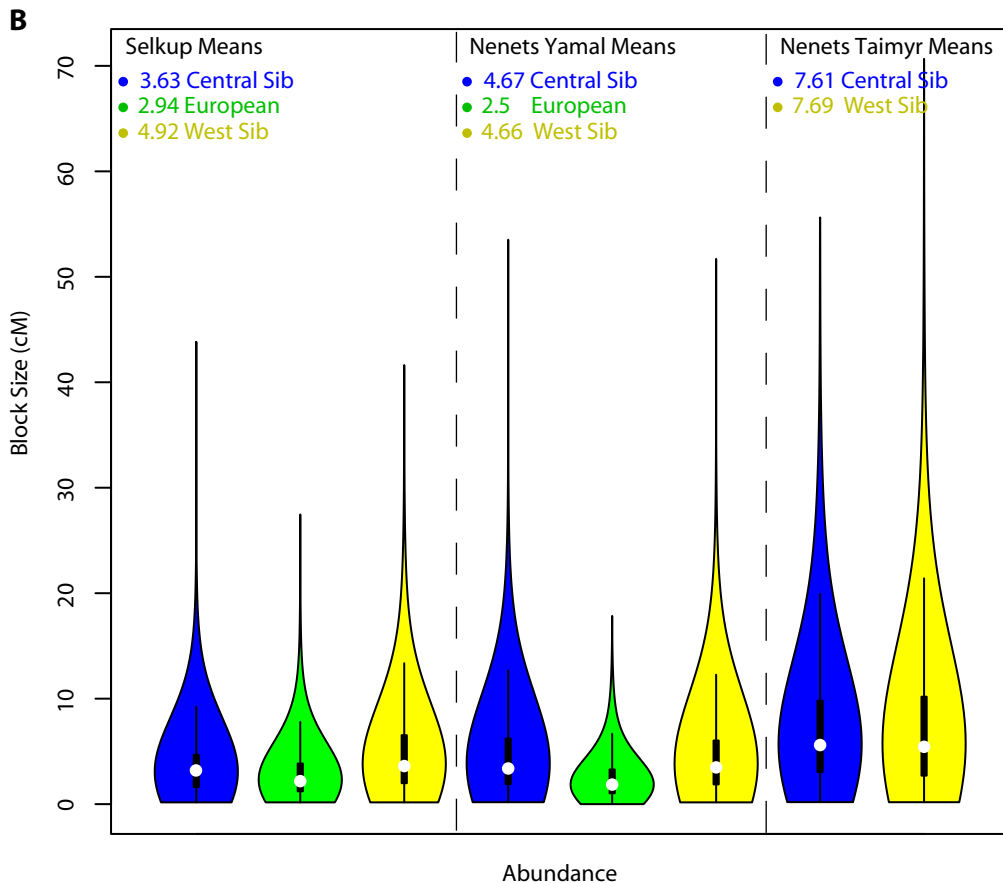

FIGURE S16. Admixture profiles for the Samoyedic-speaking populations: Selkup and Nenets. (A) Admixture history graphs and admixture dates inferred for each population and each admixture episode. Proxy parental populations for the different ancestral components (represented as circles) were as follows: Blue = Nganasan, Yellow = Khanty, Light Green = Italians. (B) Cumulative distribution of all ancestry blocks. For each population the plot captures the total abundance of blocks of each ancestry (x axis) of different genetic lengths in cM (y axis); the average width of the blocks of each ancestry and variance around the mean are also shown.

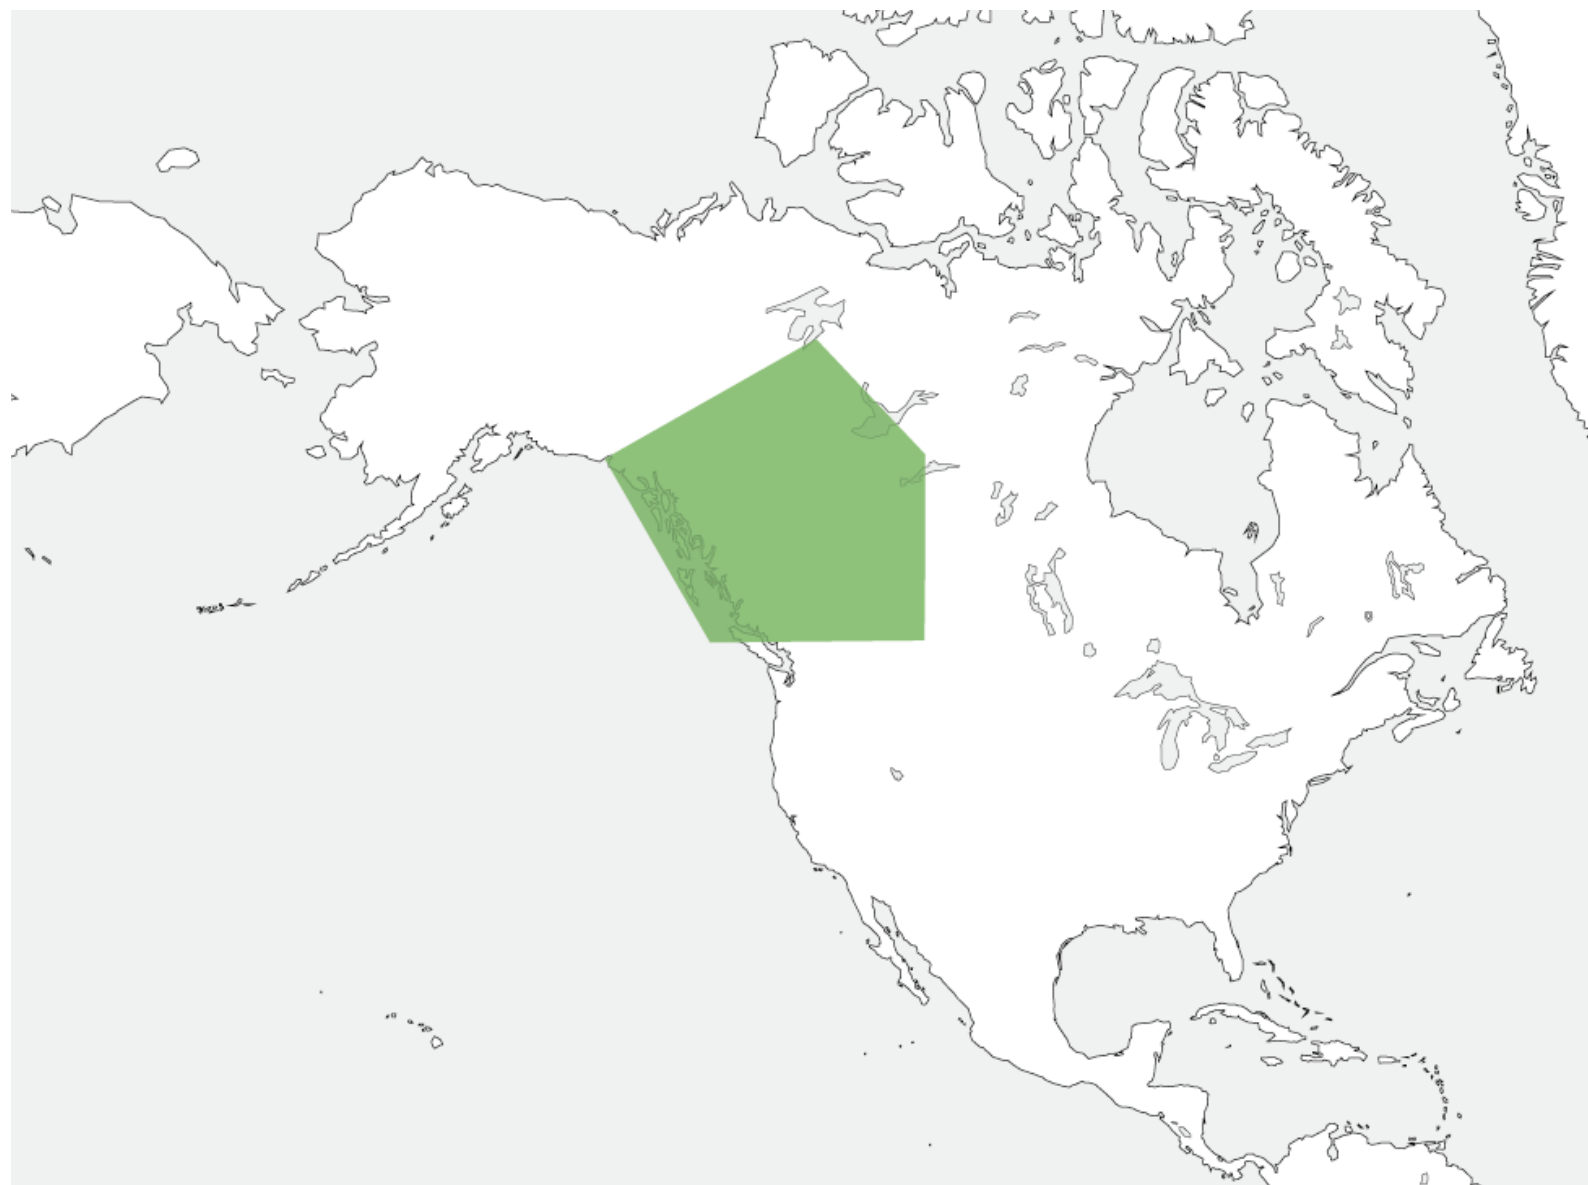

FIGURE S17. Extrapolated origins of the Siberian Naukan Yupik. The extrapolation is based on the results of the regression analysis of the genetic and geographic distances (Figure S22), which revealed that all the genetic distances between the Naukan Yupik and other populations in Siberia are elevated given the geographic distance between them. In order to improve the fit between the genetics and geography, the Naukan Yupik were assigned different sets of geographic coordinates in Alaska, Canada and Greenland, each time recalculating the regression coefficient. The best improvement was achieved when the Naukan Yupik were assigned any set of coordinates in the geographic region of Canada circumscribed here by the shaded area.

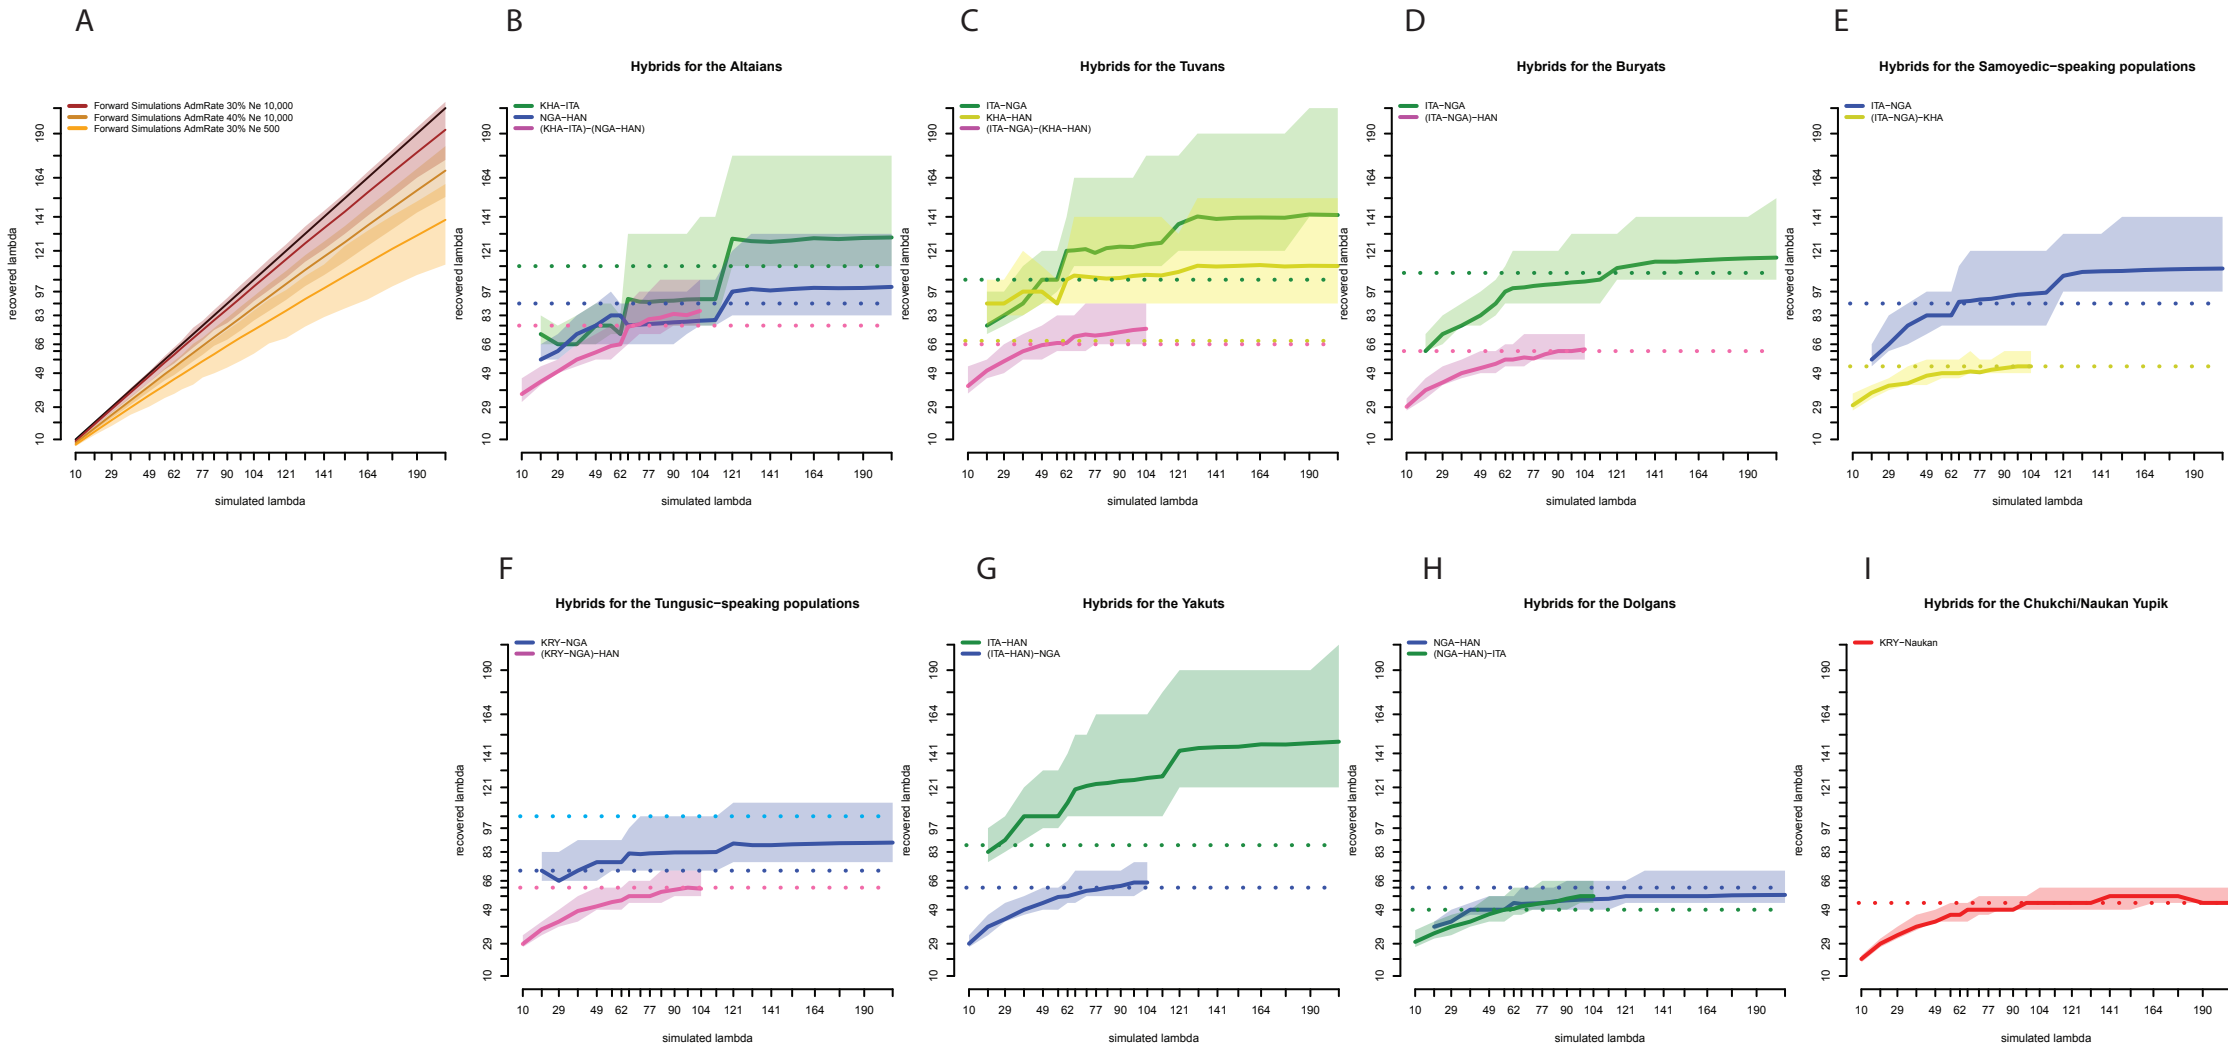

FIGURE S18. Assessment of the time-depth resolution of the study. (A) Admixture dates recovered from the results of forward simulations (100 simulations for each parameter setting) where we model dynamics of recombination in an admixed population with a certain rate of admixture and  $N_e$ . The observed number of breakpoints starts to deviate from the expected value (parameterized by  $\lambda$ ) beginning around 50-100 generations since the admixture event (see Text S1D for details and references). Accordingly, since the WT method recovers not the simulated number of breakpoints, but the time of admixture the observed number of breakpoints corresponds to, the recovered  $\lambda$  deviates from the simulated  $\lambda$ . (B-I) Recovery of the admixture dates from artificial genomes, generated from populations used in this study as proxies for the parental groups. Solid lines show recovered admixture dates in an artificially generated hybrid population where a more recent gene flow occurs on a background of an older admixture event. The shaded area denotes the 95% confidence interval. Dotted lines denote the date of admixture actually inferred from the Siberian data. In (F) the lighter blue dotted line indicates the date of the Red-Blue admixture inferred for the Oroqen, while the darker blue line indicates the date inferred for the Berezovka Evens.

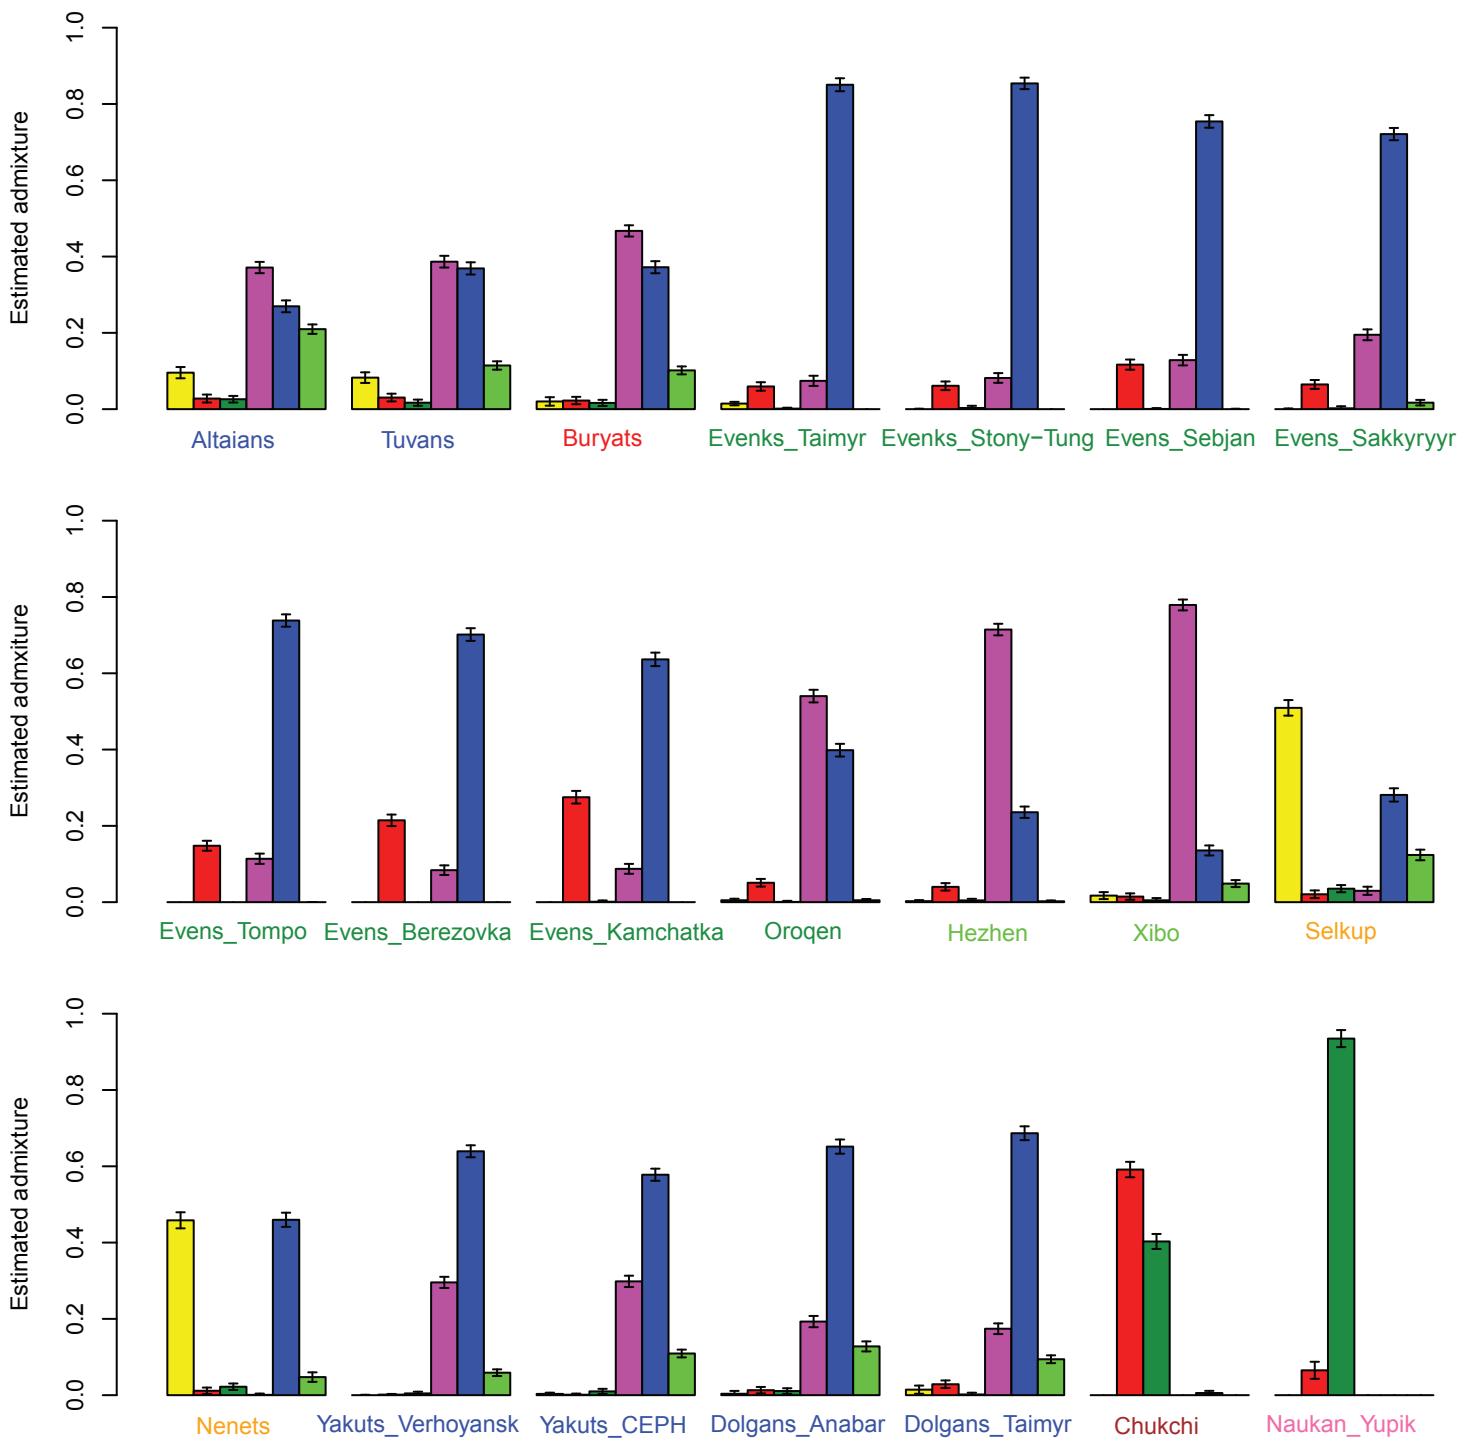

FIGURE S19. Admixture proportions and standard errors determined for each estimated admixture coefficient using a block bootstrap approach. Each color indicates a different ancestry component as described in the legend to Figure 1 of the main text.

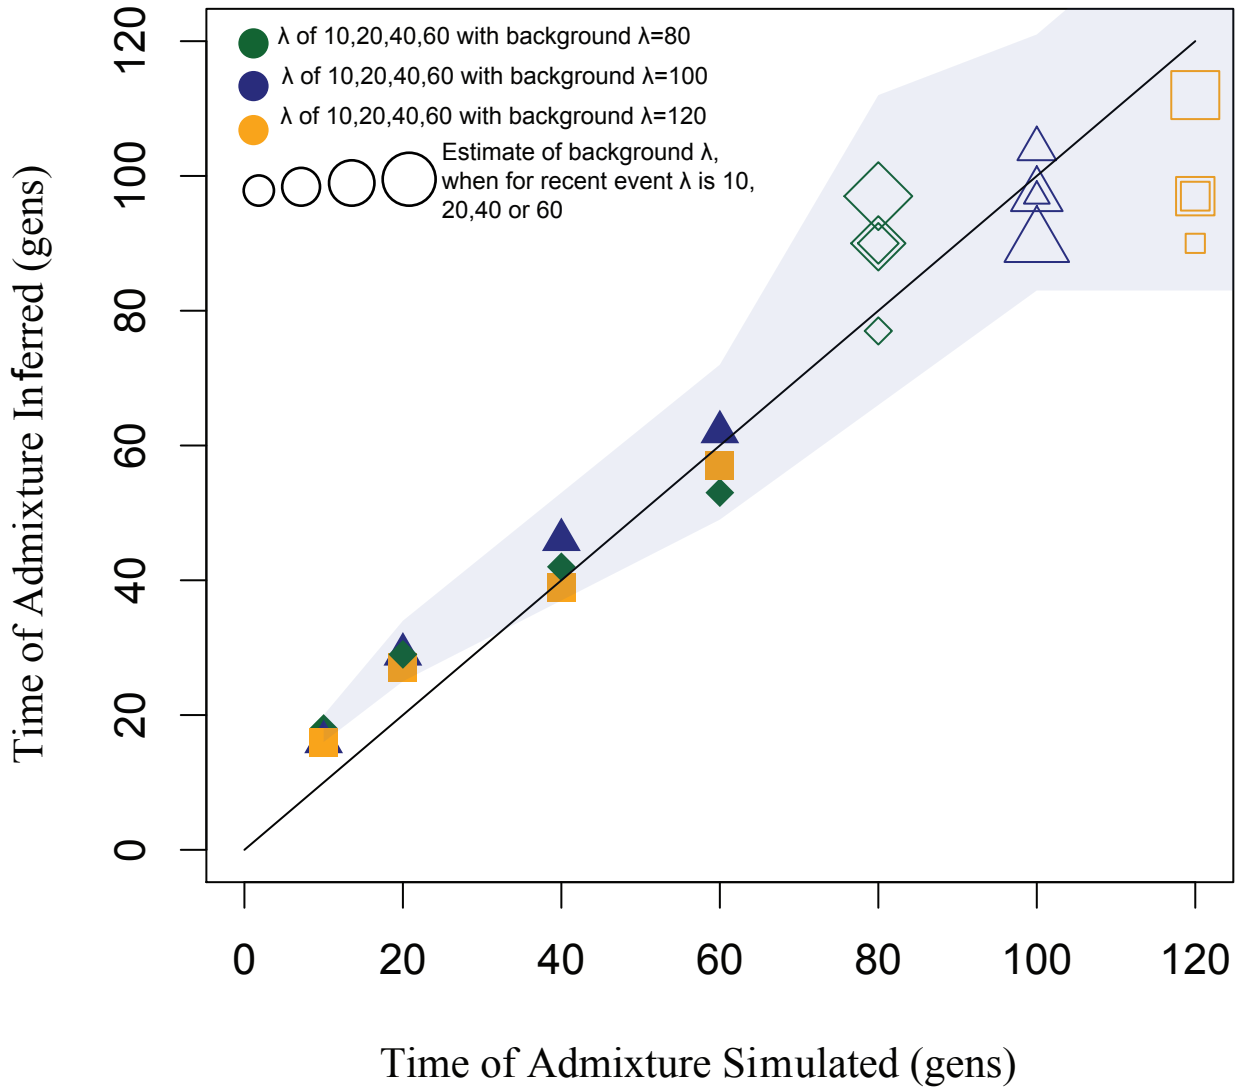

FIGURE S20. Performance of the wavelet transform analysis (adapted to include complex admixture scenarios) in recovering the simulated dates of admixture. The method was applied to 12 artificial datasets with different admixture histories. Each recent admixture time point ( $\lambda = 10, 20, 40$  and  $60$ ) was simulated three times, each time using a different admixture background ( $\lambda = 80, 100$  or  $120$ ). The shaded area denotes the 95% confidence interval for the inferred dates of admixture.



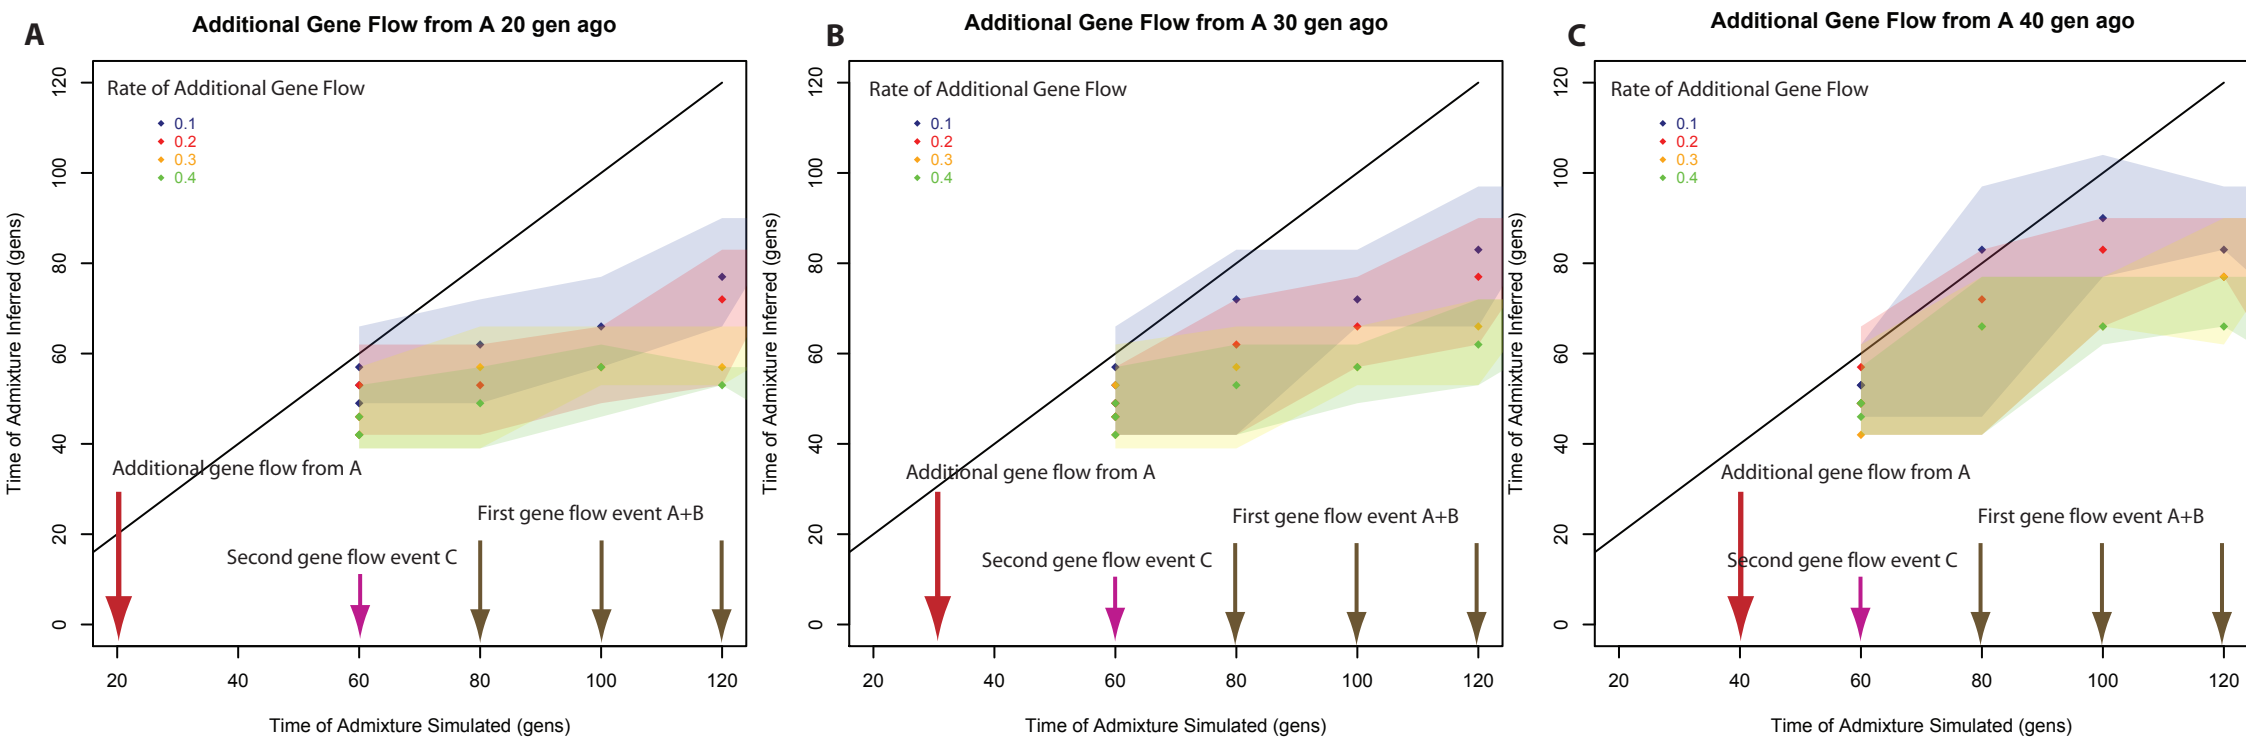

FIGURE S21. Admixture date estimates for artificially constructed admixed populations, where admixture history involved one ancestry which was contributed twice. Each panel shows a comparison of simulated vs. estimated dates of admixture for 12 sets of simulated populations (each with the same recent episode of admixture 60 generations ago, and a different earlier episode of admixture 120, 100 or 80 generations ago). Additional gene flow with four different admixture rates ( $\alpha = 0.1, 0.2, 0.3$  or  $0.4$ ) from a population which had already contributed to an earlier episode was simulated for each of these populations. The shaded area denotes the 95% confidence interval for the inferred dates of admixture. Additional gene flow was introduced at (A) 20 (B) 30 or (C) 40 generations ago.

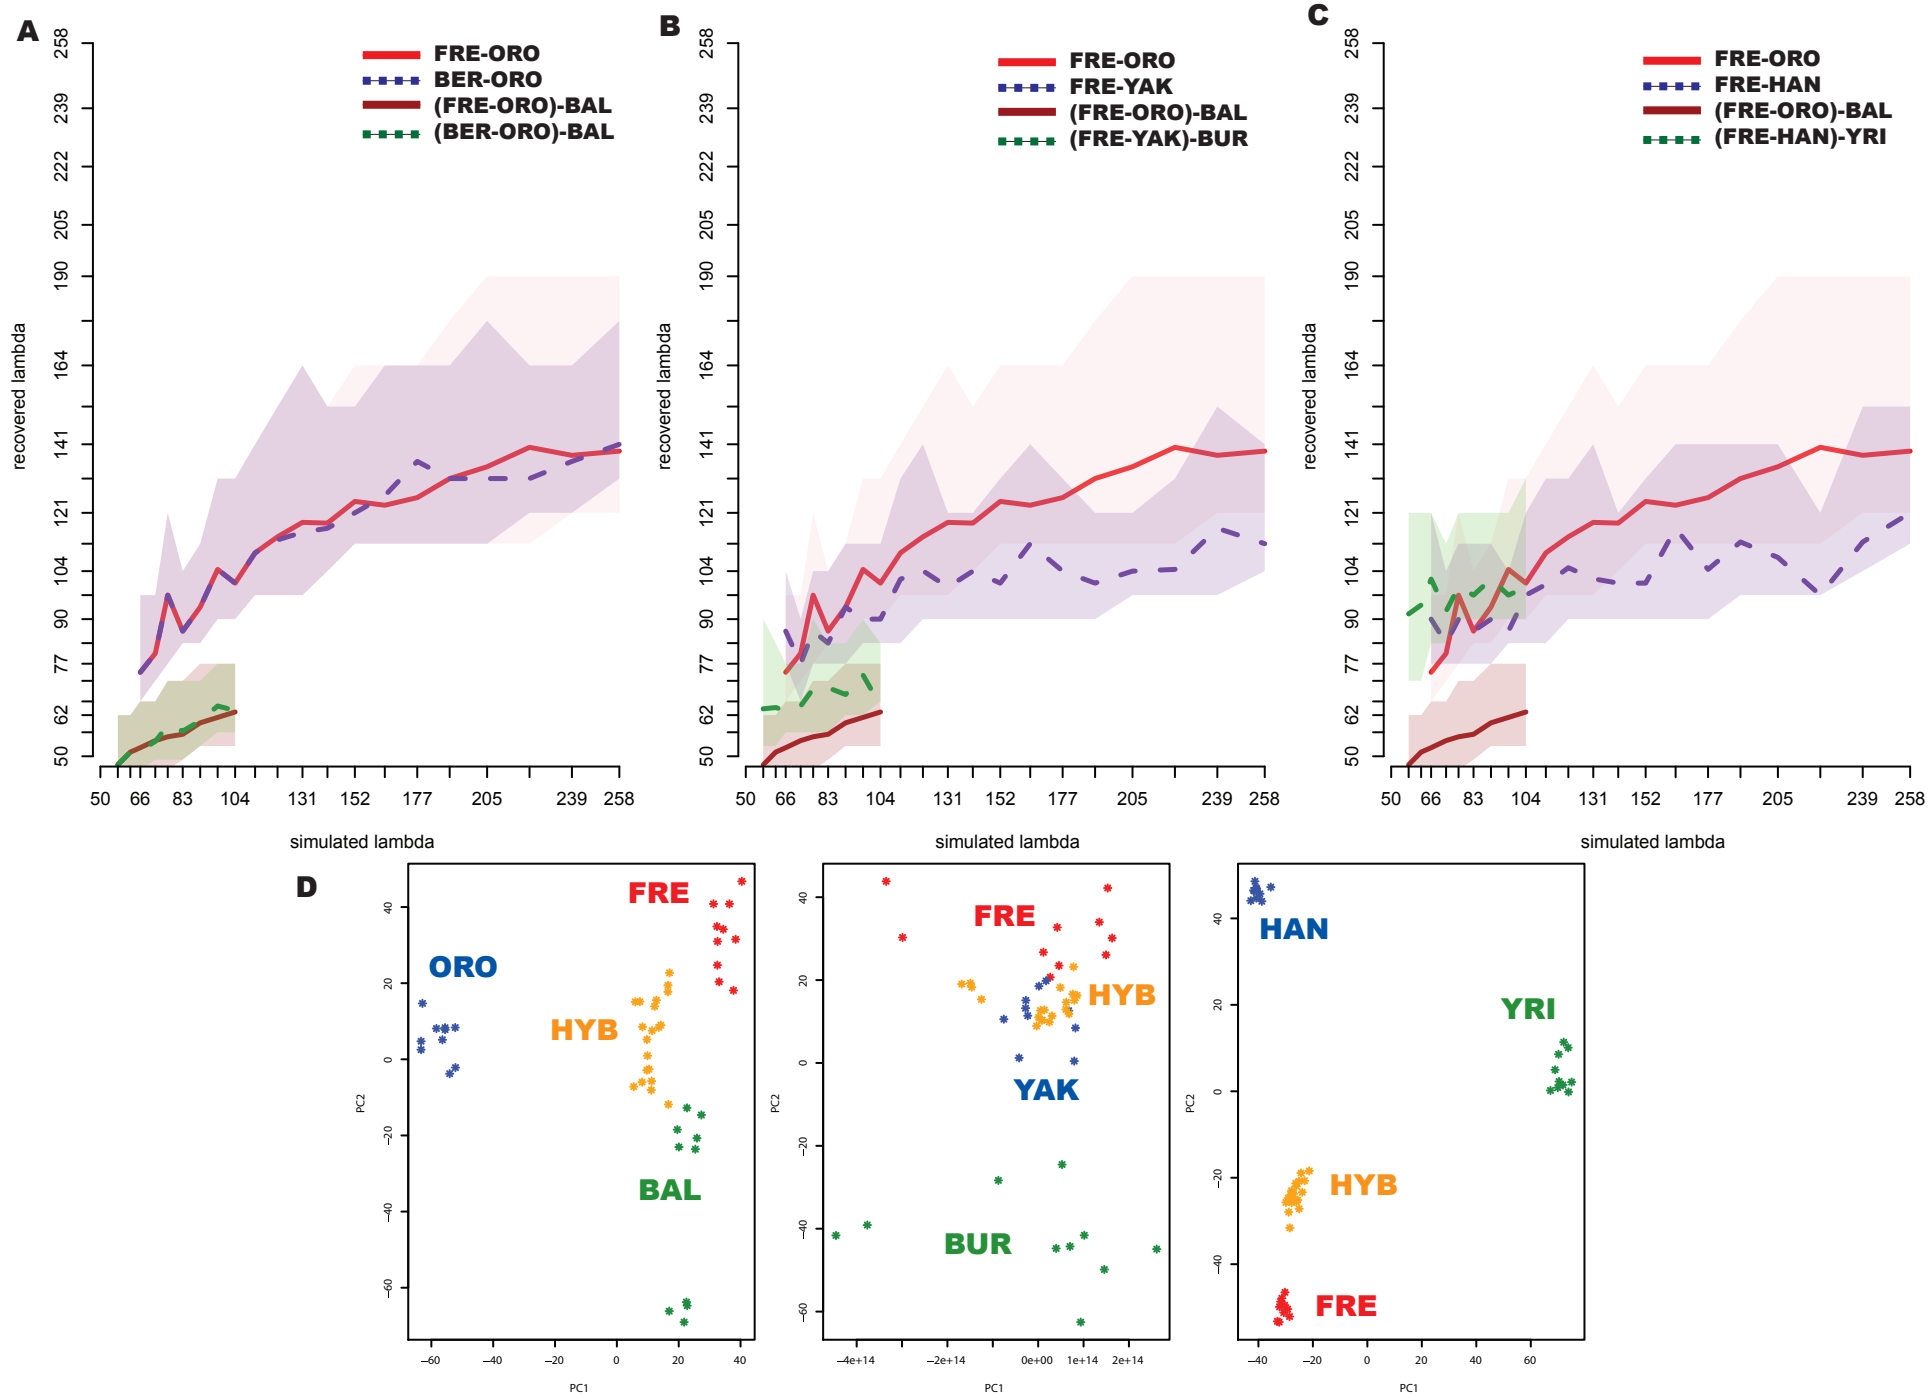

FIGURE S22. Sensitivity of PCAdmix and WT methods to mis-specification of parental groups. (A-C) Recovery of the admixture dates from artificial genomes. Solid lines show the result when the inference of ancestry along the chromosome by PCAdmix is based on the true source populations. Dotted lines show results obtained when mis-specified proxies are used in lieu of the true sources. (D) PCA results for SNPs used in the analysis.

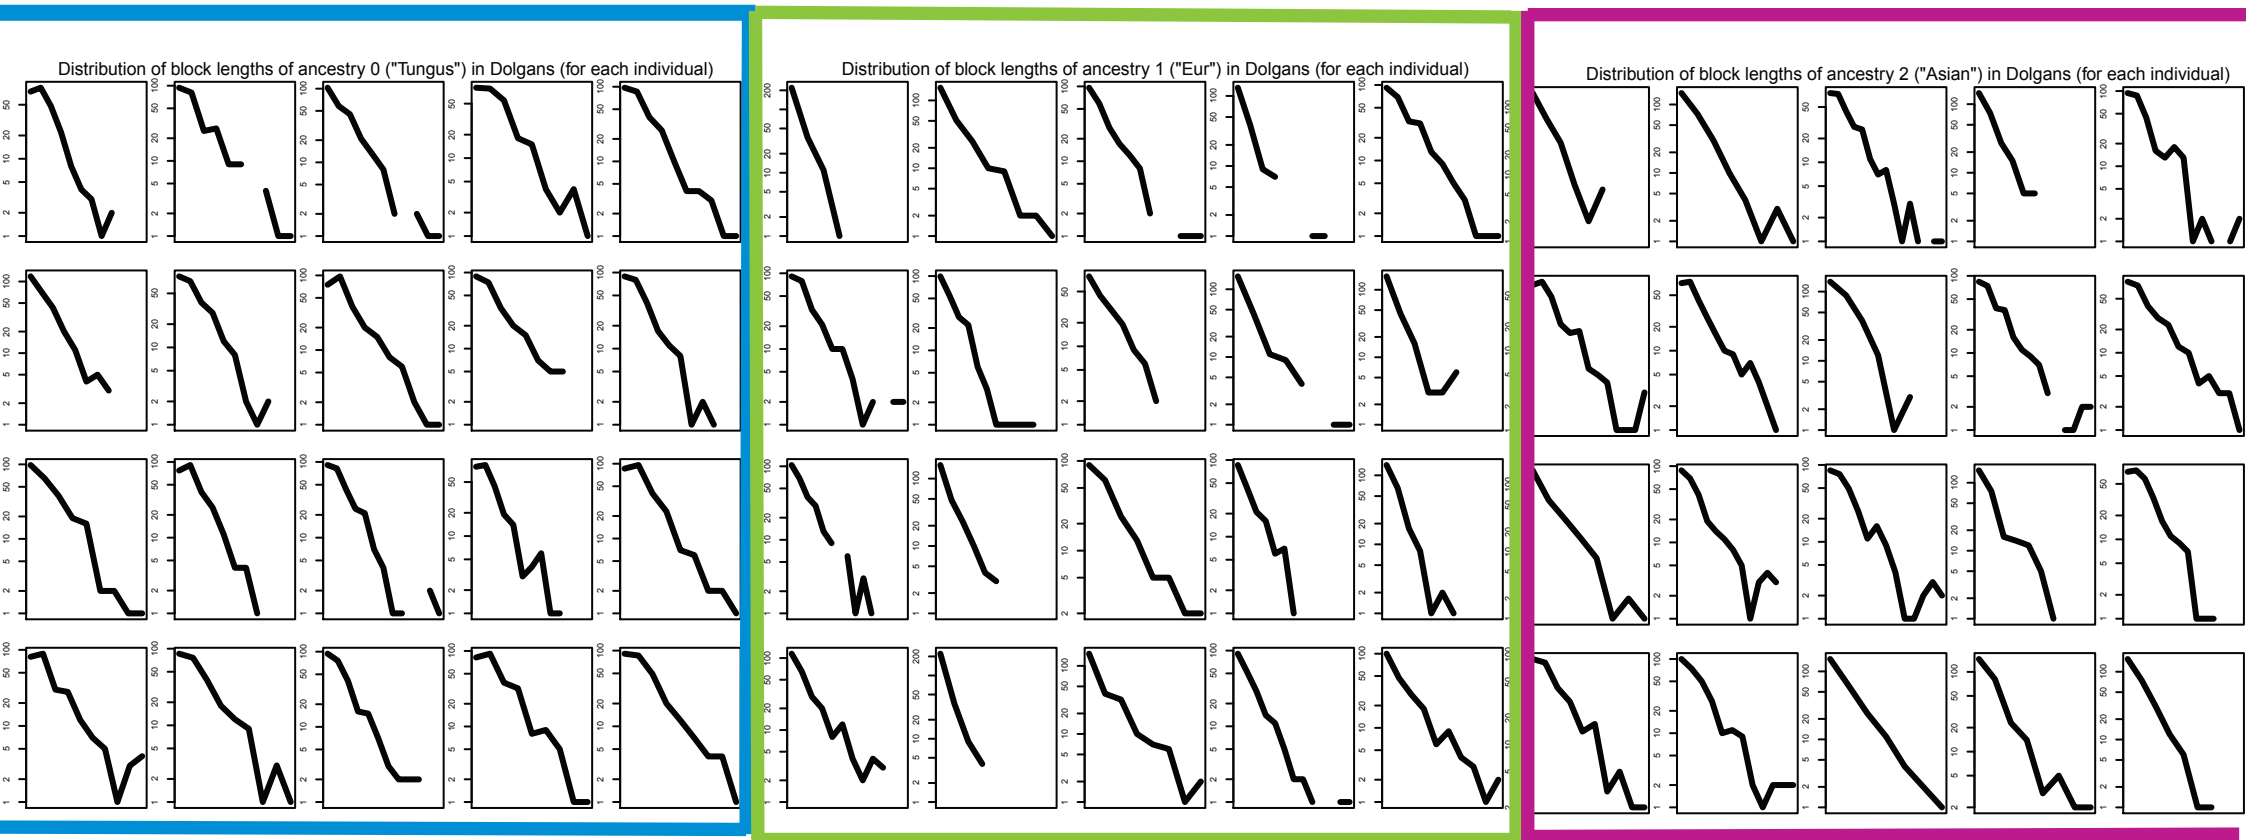

FIGURE S23. Test for excess of small-sized ancestry blocks as inferred by PCAdmix, with the expectation that an excess of short ancestral blocks would indicate erroneous insertions by PCAdmix. Shown is the genomewide distribution of block widths of each ancestry inferred for each Anabar Dolgan individual. Block width in (cM) is shown on the x-axis, while abundance is represented on the y-axis (note that the scale here is logarithmic).

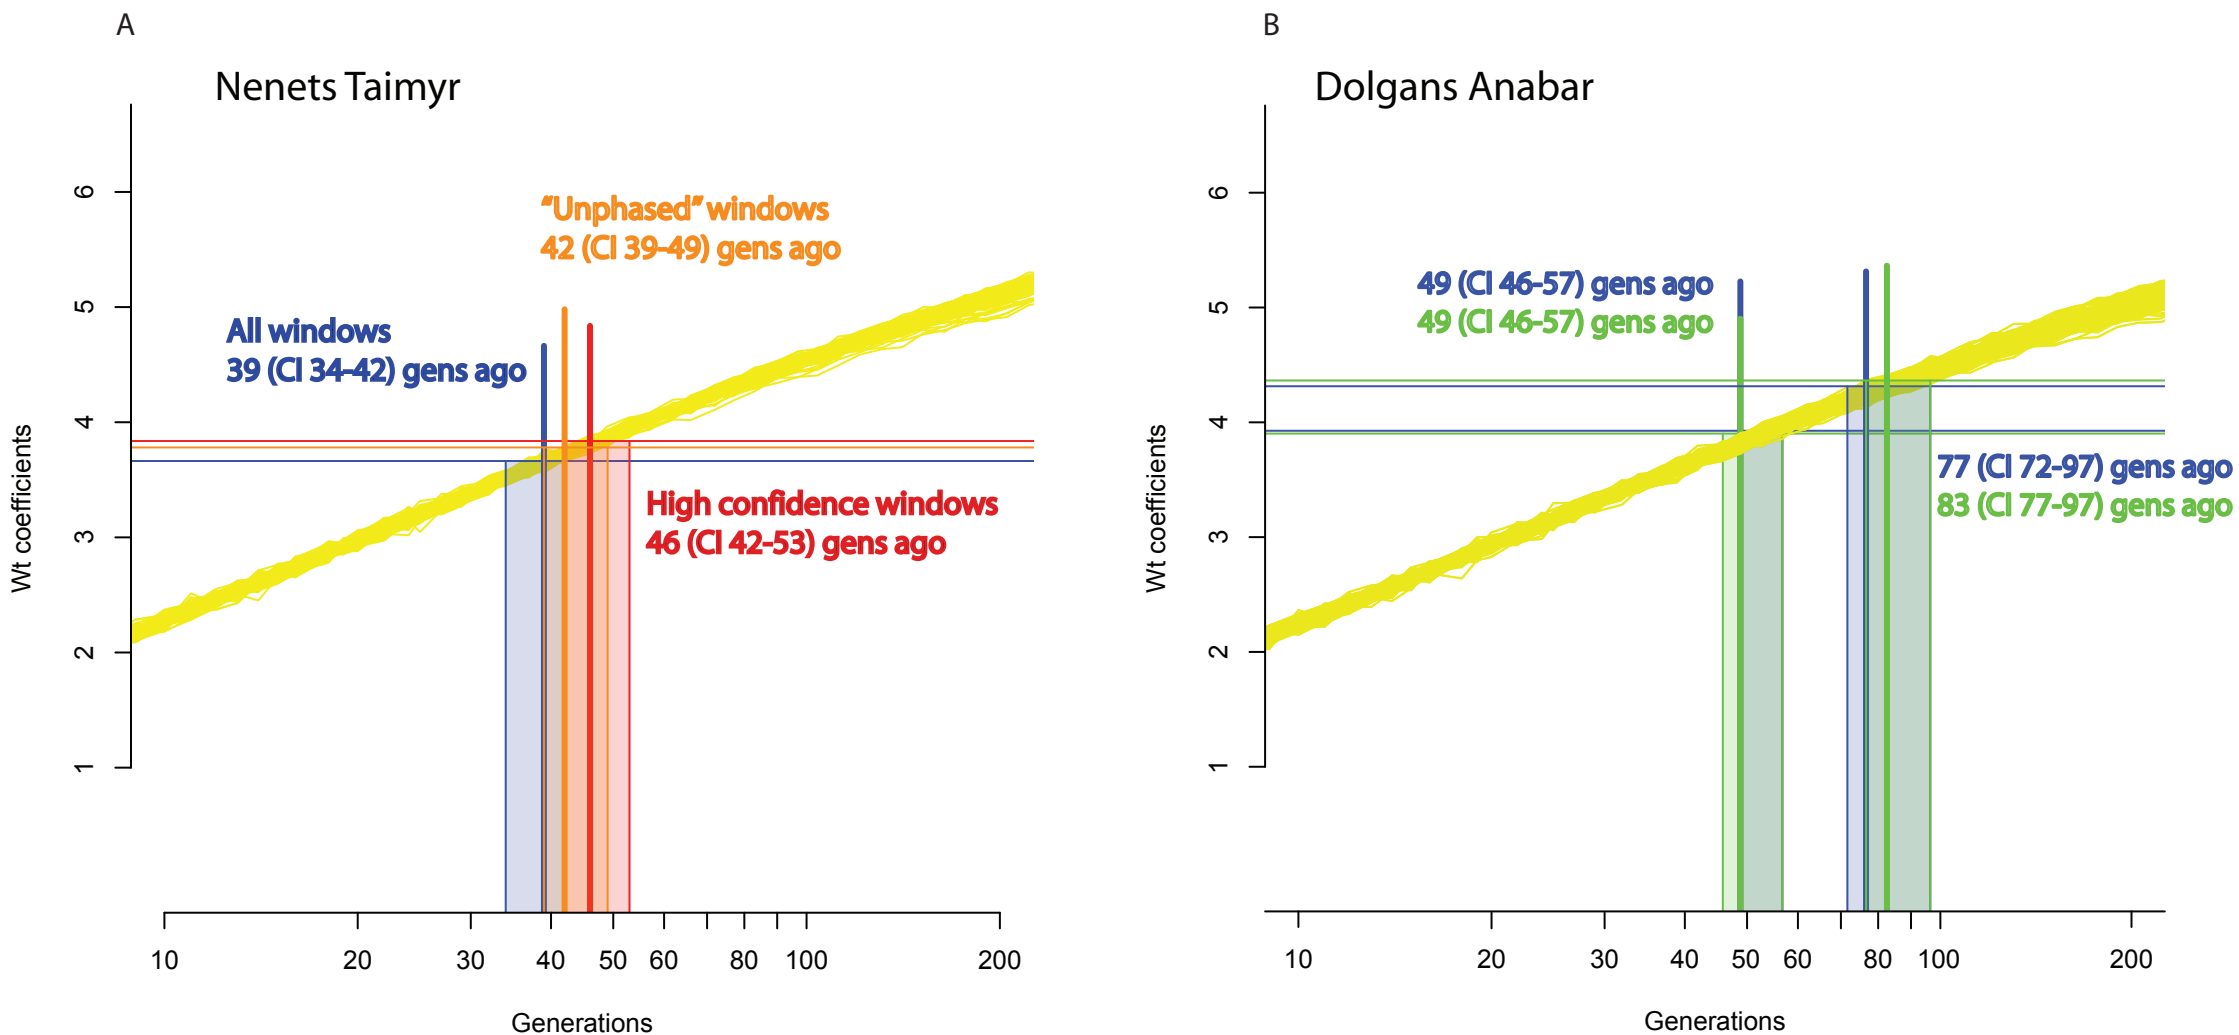

FIGURE S24. Testing the effect of the phasing switch error on time of admixture estimates. (A). Comparison of dates of admixture inferred using a full set of windows (blue) vs. only high confidence windows (red), and on artificially "unphased" data (orange). Dating is based on simulated data from 100 simulations with a 30% migration rate. Each curve represents a single admixed population. Average WT centers calculated for 100 chromosomes drawn at random from each population at exponentially growing time points are plotted as a function of time. Vertical lines indicate the time estimate, and shaded boxes define the confidence intervals. Time estimates are based on the entire unfiltered sample of Taimyr Nenets, and the admixture rate for the simulated data is chosen so as to match the empirical data. (B). Admixture time estimates (for two episodes of admixture) based on data phased with either BEAGLE or SHAPEit. Measurements obtained for a more recent vs. an older admixture episode using the BEAGLE-phased and SHAPEit-phased data are shown by blue and green horizontal lines, respectively. Vertical lines indicate the time estimate (blue font for the BEAGLE-phased, and green font for the SHAPEit-phased data), and shaded boxes define the confidence intervals. Time estimates are based on the entire unfiltered sample of Anabar Dolgans, and the admixture rate for the simulated data is chosen so as to match the empirical data.
